# Supplementary material for: Elucidating Polypharmacological Mechanisms of Polyphenols by Gene Module Profile Analysis
Source: Int J Mol Sci. 2014 Jun 25;15(7):11245–54. doi: 10.3390/ijms150711245 (PMC4139780; doi:10.3390/ijms150711245)
Supplement: Supplementary File 1 [file ijms-15-11245-s002.xlsx]

## Sheet: Table S1
Table S1. Gene module profiles of 1309 agents characterized by a 49-dimensional binary vector
	bicluster1	bicluster2	bicluster3	bicluster4	bicluster5	bicluster6	bicluster7	bicluster8	bicluster9	bicluster10	bicluster11	bicluster12	bicluster13	bicluster14	bicluster15	bicluster16	bicluster17	bicluster18	bicluster19	bicluster20	bicluster21	bicluster22	bicluster23	bicluster24	bicluster25	bicluster26	bicluster27	bicluster28	bicluster29	bicluster30	bicluster31	bicluster32	bicluster33	bicluster34	bicluster35	bicluster36	bicluster37	bicluster38	bicluster39	bicluster40	bicluster41	bicluster42	bicluster43	bicluster44	bicluster45	bicluster46	bicluster47	bicluster48	bicluster49
abamectin	0	0	1	0	0	0	0	0	1	1	1	0	0	0	0	0	0	1	0	0	0	0	0	0	0	0	0	0	0	0	1	0	1	0	0	0	1	0	0	0	0	0	1	0	0	1	1	0	0
acacetin	0	0	1	0	0	0	1	0	0	0	1	0	1	0	0	0	0	1	0	0	0	0	0	0	1	0	0	0	0	0	1	1	0	0	0	0	1	0	0	0	0	0	1	0	0	1	0	1	0
acebutolol	0	0	0	0	0	0	0	0	0	0	0	0	0	0	0	1	0	0	0	1	0	1	1	0	0	0	0	0	1	0	0	0	0	0	0	0	0	1	0	1	0	0	0	0	0	0	0	0	0
aceclofenac	1	1	0	0	0	1	0	1	0	0	0	0	0	0	0	1	0	0	0	0	0	0	0	0	0	0	0	0	0	0	0	0	0	0	0	0	0	0	0	0	0	1	0	0	1	0	0	0	1
acemetacin	0	0	0	0	0	1	0	0	0	0	0	0	0	0	0	0	0	1	0	1	0	0	0	0	0	0	1	0	1	0	0	0	0	0	0	0	0	1	1	0	0	0	0	0	0	0	0	0	0
acenocoumarol	0	0	0	0	0	1	1	0	0	0	0	0	0	0	0	0	0	0	0	1	0	0	0	0	0	0	0	0	0	0	0	0	0	0	0	0	0	0	0	0	0	0	0	0	0	0	0	0	0
acepromazine	1	1	1	1	0	0	0	0	1	0	0	1	1	1	0	0	0	1	1	0	0	0	0	1	1	1	0	0	1	0	1	1	0	0	1	0	1	0	0	1	0	0	1	1	1	0	0	0	0
acetazolamide	0	0	0	0	0	0	0	0	1	0	0	0	0	0	0	0	0	0	1	0	0	0	0	0	0	0	0	1	0	0	0	0	0	0	0	0	0	0	1	0	0	0	0	0	0	0	0	0	0
acetohexamide	0	0	0	0	0	0	0	0	1	0	0	0	0	1	0	0	0	1	1	1	0	0	0	0	0	1	1	1	0	0	0	1	0	0	1	0	0	0	0	1	0	0	0	0	0	1	0	0	0
acetylsalicylic acid	0	0	0	0	0	0	0	0	1	0	0	0	0	0	1	1	0	0	0	0	1	0	0	1	0	0	1	1	0	0	0	1	0	1	0	0	0	0	0	1	1	0	0	0	0	0	0	0	0
acetylsalicylsalicylic acid	0	0	0	0	0	1	0	0	0	0	0	0	0	0	0	0	0	0	1	0	0	0	0	0	0	1	0	1	0	0	0	0	0	0	0	0	0	0	1	0	0	0	0	0	0	0	0	0	0
aciclovir	0	0	0	0	0	1	1	1	0	0	0	0	0	0	0	0	0	1	0	1	1	1	0	0	0	1	1	0	0	0	0	0	1	0	0	0	0	0	0	0	0	1	0	0	0	0	0	0	0
aconitine	0	0	0	0	0	0	0	0	0	0	0	0	0	0	1	1	0	1	0	0	0	0	0	0	0	1	1	0	1	0	0	1	0	0	1	0	0	1	0	0	1	0	0	0	1	0	0	0	0
adenosine phosphate	1	1	0	1	0	1	0	1	0	0	0	0	0	0	1	0	0	0	0	0	1	0	0	0	0	0	0	0	0	0	0	1	0	0	0	0	0	0	1	0	0	1	0	0	1	0	1	1	0
adiphenine	0	0	0	0	0	1	0	0	1	0	1	0	0	0	0	1	0	0	0	1	0	0	0	0	0	0	1	0	0	0	0	0	0	0	0	0	0	1	1	0	0	0	0	0	0	0	0	0	1
adipiodone	1	0	0	0	0	0	1	0	0	0	0	0	0	0	0	0	0	1	0	0	0	0	1	0	0	1	0	1	0	0	0	1	0	0	0	0	0	1	0	0	1	0	0	0	0	0	0	0	1
adrenosterone	0	1	0	1	0	0	0	0	0	0	0	0	0	0	1	0	0	0	0	0	1	0	0	0	0	0	1	1	0	1	0	0	0	0	0	0	0	0	0	1	1	0	0	0	0	0	0	0	1
AG-012559	1	1	0	0	0	0	0	0	0	0	0	0	0	0	0	0	0	1	1	0	0	0	0	0	0	0	0	0	1	1	0	0	1	0	0	0	0	0	1	0	0	0	1	0	0	0	0	0	0
AG-013608	1	0	0	0	0	1	1	1	0	1	0	1	0	1	1	0	0	1	0	0	0	0	0	1	1	0	0	1	0	0	0	1	0	0	0	0	1	0	1	0	0	0	1	0	1	0	1	0	0
AG-028671	1	0	0	0	0	0	0	0	0	0	0	1	0	0	0	0	0	1	0	0	0	0	1	0	0	1	0	0	0	0	0	0	1	0	0	0	0	0	0	0	0	0	0	0	0	0	1	1	1
AH-23848	1	1	0	0	0	0	0	0	0	0	0	0	0	0	0	0	0	0	1	1	0	0	0	0	0	1	0	0	1	1	0	0	0	0	1	0	0	0	1	0	1	0	0	0	0	0	0	0	0
AH-6809	1	0	0	0	0	0	0	0	0	0	0	0	0	0	1	0	0	0	1	1	0	0	0	1	0	0	0	0	0	0	0	0	0	0	1	0	0	0	1	0	0	0	0	0	1	0	0	0	0
ajmaline	1	1	0	0	0	0	0	0	0	0	0	1	1	1	1	1	1	1	1	1	0	0	1	1	1	1	1	0	1	1	1	1	1	0	1	0	1	0	1	1	1	0	1	1	1	0	0	0	0
albendazole	0	1	0	0	0	0	0	0	1	1	0	1	1	0	0	1	0	0	1	0	1	0	0	1	0	0	0	1	0	0	0	0	0	0	1	0	0	0	0	0	0	0	0	0	0	1	1	0	0
alclometasone	0	1	0	1	0	0	0	0	0	0	0	0	0	0	0	0	0	0	0	1	0	0	1	0	0	0	0	0	0	0	0	0	0	0	0	0	0	0	1	0	0	1	1	0	0	0	1	0	1
alcuronium chloride	0	0	0	0	0	0	0	0	1	0	0	0	0	0	0	0	0	1	0	0	0	0	0	0	0	0	1	1	1	0	0	0	1	1	1	0	0	0	0	1	1	0	0	0	0	0	0	0	1
alexidine	0	0	0	1	0	0	1	1	0	1	0	1	1	0	1	0	1	1	1	0	0	1	1	0	1	0	0	1	1	1	1	0	1	0	0	0	0	0	0	1	0	0	1	1	0	1	1	0	0
alfadolone	0	0	0	1	0	1	0	1	1	0	0	0	0	0	0	1	0	0	0	1	0	0	0	0	0	0	0	0	0	1	0	0	0	1	0	0	0	0	1	0	1	0	0	0	0	0	0	0	0
alfaxalone	0	0	0	1	0	0	0	0	0	0	0	0	0	1	0	0	0	0	0	0	0	0	1	1	0	0	0	1	1	0	0	0	0	0	0	0	0	1	1	0	1	0	1	0	0	0	0	0	0
alfuzosin	0	1	0	0	0	0	0	0	0	0	0	0	0	0	0	0	0	1	1	0	0	0	0	1	0	0	1	1	0	0	0	1	0	0	0	0	0	0	0	0	0	0	0	0	0	0	0	0	0
alimemazine	0	0	0	1	0	0	0	0	0	0	1	1	0	0	0	0	0	1	1	1	0	0	0	0	0	0	0	0	0	0	0	1	0	1	0	0	0	0	0	0	0	0	1	1	0	1	1	0	0
allantoin	0	1	0	0	0	0	0	0	0	0	0	0	0	0	0	1	0	0	0	1	0	0	0	0	0	0	1	0	0	1	0	0	0	0	0	0	0	0	0	1	0	0	0	1	0	0	0	0	1
alpha-ergocryptine	0	0	0	0	1	0	0	0	0	1	1	1	0	0	1	0	0	1	0	1	0	0	1	0	0	0	0	0	0	1	0	0	1	0	0	0	1	0	1	0	0	0	0	0	0	1	1	0	0
alpha-estradiol	0	0	0	0	0	0	0	0	1	0	0	0	0	1	1	0	0	1	1	0	0	0	0	1	0	1	0	0	0	1	0	1	1	1	1	0	1	0	1	0	1	1	0	1	1	0	0	0	0
alpha-yohimbine	0	0	0	0	0	1	1	1	0	0	0	0	0	0	0	0	0	0	0	0	0	0	0	0	0	0	0	1	0	0	0	0	1	0	0	0	0	0	0	0	0	0	0	1	0	0	0	0	0
alprenolol	1	1	0	0	0	0	0	0	0	0	0	0	0	0	0	1	0	0	0	0	1	0	0	0	0	1	1	0	0	0	0	0	0	0	0	0	0	1	0	1	1	1	0	0	1	0	0	0	0
alprostadil	0	0	0	0	0	0	1	0	1	0	1	0	0	0	0	0	0	0	0	1	0	0	0	0	0	0	0	0	1	0	0	0	1	0	0	0	0	0	0	0	0	0	0	0	0	0	1	1	1
alsterpaullone	0	0	1	0	0	0	0	0	0	0	0	1	0	1	0	0	1	0	0	0	1	1	0	0	1	0	0	0	0	0	1	0	0	0	0	0	1	1	0	0	0	0	1	0	0	0	0	0	0
altizide	0	0	0	0	0	0	0	0	0	0	0	0	0	0	0	0	0	1	1	0	0	0	0	0	0	0	0	0	0	0	0	1	0	0	1	0	0	0	1	0	0	0	0	0	0	0	0	0	0
altretamine	0	0	0	0	0	0	0	0	1	0	0	0	0	0	0	0	0	0	0	0	0	0	1	0	0	0	0	0	1	1	0	0	1	0	0	0	0	0	1	0	0	0	0	0	1	0	0	0	1
alverine	0	0	0	0	0	0	0	0	1	0	0	1	0	0	0	1	0	0	1	0	0	0	1	1	0	1	1	0	1	0	0	0	0	0	0	0	0	1	0	0	1	1	1	1	0	0	1	0	1
alvespimycin	0	1	0	0	1	0	0	0	1	0	1	1	0	0	0	1	1	0	1	0	0	0	1	1	1	1	1	0	0	1	1	0	1	0	0	1	0	0	0	1	1	0	1	0	0	0	0	0	0
amantadine	1	0	0	0	0	0	0	0	0	0	0	0	0	0	1	0	0	0	0	1	1	1	0	1	0	0	0	1	1	0	0	0	1	0	0	0	0	1	0	0	0	0	0	0	0	0	0	0	0
ambroxol	1	1	0	0	0	1	0	1	0	0	0	0	1	0	1	1	0	1	1	0	0	0	1	1	0	1	1	1	0	1	0	0	0	0	0	0	0	0	1	0	1	1	1	1	1	0	0	0	0
amikacin	0	1	0	0	0	1	0	1	0	0	0	0	1	0	0	0	0	1	1	0	0	0	0	0	0	1	0	0	0	0	0	0	0	0	0	0	0	1	1	0	0	0	0	0	0	0	0	0	1
amiloride	0	0	0	0	0	0	0	0	0	0	0	1	0	0	0	1	0	0	0	0	0	1	0	0	1	1	0	0	0	1	0	0	0	0	0	0	0	1	1	0	0	0	0	0	1	0	0	1	1
aminocaproic acid	1	0	0	0	0	0	0	0	0	0	0	0	0	1	0	0	0	0	0	0	0	0	1	0	0	0	0	1	1	0	0	0	0	0	0	0	0	1	0	0	0	0	1	0	0	0	0	0	0
aminoglutethimide	0	0	0	0	0	1	0	0	0	0	0	0	0	0	0	1	0	1	0	0	0	0	0	0	0	0	0	0	0	0	0	0	0	0	0	0	0	0	1	0	0	0	0	0	0	0	0	0	1
aminohippuric acid	1	1	0	0	0	0	0	1	0	0	0	0	0	0	1	0	0	0	0	0	0	0	0	0	0	1	0	0	0	0	0	1	0	0	0	0	0	0	1	0	0	0	0	1	1	0	0	0	1
aminophenazone	0	0	0	0	0	0	0	0	0	0	0	0	0	0	0	1	0	0	1	0	0	0	0	0	0	0	0	1	0	1	0	0	0	1	0	0	0	0	0	0	0	0	0	0	0	0	0	0	1
aminophylline	0	0	0	0	0	0	0	0	0	0	0	0	0	0	0	1	0	0	0	0	0	0	1	0	0	0	0	0	0	1	0	0	0	0	0	0	0	1	0	1	0	1	0	0	0	0	0	0	1
amiodarone	1	0	1	1	0	0	0	0	0	1	0	1	1	1	0	1	0	1	0	1	0	0	0	1	1	0	0	1	1	0	0	0	0	1	0	1	1	0	1	0	0	0	1	0	0	1	1	0	0
amiprilose	0	0	0	0	0	1	0	1	0	0	0	0	0	0	0	1	0	0	1	0	0	0	0	0	0	1	0	0	0	1	0	0	0	1	0	0	0	0	1	0	0	0	0	0	0	0	0	0	1
amitriptyline	0	0	1	1	0	0	0	0	1	1	1	1	1	0	0	1	0	0	1	1	0	0	0	0	0	0	0	0	0	1	1	0	0	0	0	0	0	1	1	0	0	0	0	1	0	1	1	0	0
amodiaquine	0	0	0	1	0	0	0	0	0	0	0	1	0	0	1	0	0	1	0	0	1	1	0	0	0	0	0	0	0	0	0	0	0	1	0	0	0	0	0	0	0	1	0	1	0	0	0	1	0
amoxapine	0	1	0	1	0	0	0	0	1	1	1	1	1	0	0	0	0	1	1	0	0	0	0	1	0	0	1	0	0	0	1	1	0	0	0	0	0	0	0	1	0	0	1	0	0	1	0	0	0
amoxicillin	1	1	0	0	0	0	0	1	1	0	0	1	0	0	1	0	0	1	0	0	0	0	1	0	0	0	0	1	0	0	0	0	0	0	0	0	0	1	0	0	0	0	0	0	0	0	0	0	0
amphotericin B	0	1	0	1	0	0	0	0	0	0	0	0	0	0	0	0	0	1	1	0	1	0	0	0	0	0	0	0	0	1	0	1	1	1	0	1	1	0	0	0	0	0	1	1	0	0	0	0	0
ampicillin	0	0	0	0	0	0	1	0	0	0	0	0	0	0	0	0	0	0	0	0	0	1	0	0	0	0	0	1	0	0	0	0	1	1	0	0	0	0	0	0	0	0	0	0	0	0	0	0	0
amprolium	1	1	0	0	0	1	0	0	0	0	0	0	1	0	0	1	0	1	1	0	0	0	0	1	0	1	1	0	0	1	0	1	0	0	0	0	0	1	1	0	1	0	0	0	1	0	0	0	1
ampyrone	1	0	0	0	0	0	0	0	1	0	0	0	0	1	1	0	0	1	0	1	0	0	0	1	0	1	1	1	1	0	0	0	0	0	1	0	0	1	1	0	0	0	1	0	0	0	0	0	0
amrinone	0	0	0	0	0	0	1	0	1	0	0	0	0	0	0	0	0	1	1	0	0	0	0	0	1	0	0	0	0	0	0	1	0	1	0	0	0	0	0	0	0	0	1	0	1	0	0	1	1
amylocaine	0	0	0	0	0	0	0	0	0	0	0	0	0	1	0	0	0	1	1	0	0	0	0	1	0	1	0	0	0	0	0	1	1	0	1	0	1	1	1	0	0	0	1	0	0	1	0	0	0
anabasine	0	0	0	0	0	1	0	1	0	0	0	0	0	0	0	0	0	0	0	0	0	0	0	0	0	0	0	0	0	0	0	0	0	0	0	0	0	0	0	0	1	1	0	0	0	0	0	0	0
androsterone	0	0	0	1	0	0	0	1	1	0	0	0	0	0	1	0	0	0	0	0	0	0	1	0	0	0	0	1	0	1	0	1	0	0	0	0	0	1	0	1	0	1	0	0	0	0	0	0	0
anisomycin	1	1	0	0	0	0	0	0	1	0	0	0	1	0	0	0	1	0	1	0	0	1	1	1	0	1	1	0	1	1	1	1	0	0	1	0	0	0	1	1	1	0	0	0	1	1	1	1	0
antazoline	0	1	0	0	0	0	0	0	0	0	0	1	0	0	0	1	0	0	0	0	0	0	1	0	0	0	1	1	0	1	0	0	0	1	0	0	0	0	0	0	1	0	0	0	0	0	0	0	0
antimycin A	0	0	1	1	0	0	0	0	0	1	0	1	1	1	0	1	0	0	1	1	1	0	1	1	1	0	0	1	0	1	1	1	0	0	0	1	1	0	0	1	0	0	1	0	0	1	0	0	0
apigenin	0	0	1	0	0	0	1	1	0	0	1	0	1	0	0	0	0	0	0	0	0	1	0	1	1	0	0	0	0	0	1	0	0	0	0	0	1	1	0	1	0	0	1	0	0	1	0	1	0
apomorphine	1	0	1	1	0	0	0	0	1	1	1	0	0	1	1	0	0	1	0	1	1	0	0	0	1	1	0	0	0	0	0	0	0	1	0	0	1	1	0	0	0	0	1	0	0	0	0	1	0
apramycin	1	1	0	0	0	0	0	1	0	0	0	0	1	0	0	1	0	0	1	0	0	0	0	1	0	1	1	0	1	1	0	0	0	0	0	0	0	0	1	1	1	0	1	0	1	0	0	0	0
AR-A014418	1	0	0	0	0	1	0	1	0	0	0	0	0	0	0	0	0	0	0	0	0	1	0	0	1	0	0	0	0	0	1	0	0	1	0	0	0	0	0	0	0	0	0	0	0	0	0	0	0
arachidonic acid	0	0	0	0	0	1	0	0	0	0	0	0	1	0	0	0	0	1	0	0	1	0	0	0	0	1	1	1	1	0	0	0	1	0	0	0	0	1	0	0	1	0	0	0	1	0	0	0	0
arachidonyltrifluoromethane	0	0	0	0	1	1	1	1	1	1	1	0	0	0	0	0	0	0	0	0	1	0	1	0	0	1	0	0	0	0	0	0	1	1	0	1	0	0	1	0	1	1	1	0	1	0	0	0	0
arcaine	0	0	0	0	0	1	0	1	0	0	0	0	0	0	0	0	0	0	0	1	0	0	0	0	0	1	0	0	1	1	0	0	1	0	1	0	0	1	1	1	0	0	1	0	1	0	0	0	1
arecoline	1	1	0	0	0	1	1	1	0	0	0	0	0	0	0	0	0	0	0	0	0	0	0	0	0	0	0	1	1	0	0	0	0	0	0	0	0	1	0	0	0	0	0	0	1	0	0	0	0
artemisinin	0	0	0	0	0	0	0	0	1	0	0	1	0	0	1	0	0	0	0	1	1	0	0	0	0	0	1	0	0	0	0	0	0	1	0	0	0	0	0	0	1	1	0	0	0	0	0	0	0
articaine	0	0	0	0	0	0	0	1	0	0	0	0	0	0	0	0	0	0	0	0	1	0	0	0	0	0	0	0	0	0	0	0	1	1	0	0	0	0	0	0	1	0	1	0	1	0	0	0	0
ascorbic acid	0	0	0	0	0	0	1	0	0	1	0	0	0	0	0	0	0	0	0	0	0	0	0	0	0	0	0	0	0	0	0	0	0	1	0	1	0	1	0	0	0	0	0	0	0	0	0	1	1
asiaticoside	0	1	0	0	0	1	0	0	1	0	0	0	0	0	1	1	0	0	1	0	0	0	0	0	0	0	1	0	0	1	0	0	0	1	0	0	0	0	0	0	0	0	0	0	0	0	0	0	0
astemizole	0	0	1	1	0	0	1	0	1	1	1	1	1	0	1	0	1	0	0	0	1	1	1	0	0	0	1	1	0	0	1	0	0	0	0	1	0	0	0	1	0	0	1	0	0	1	1	0	0
atovaquone	1	0	0	0	0	0	0	0	0	0	0	0	0	1	0	0	1	1	0	0	0	0	0	1	1	0	0	0	1	0	1	1	0	0	1	0	0	1	0	1	1	0	1	0	1	1	0	0	0
atractyloside	0	0	0	0	1	1	1	1	1	0	0	0	0	0	0	0	0	0	0	1	1	0	0	0	0	0	0	0	0	0	0	0	1	0	0	0	0	1	0	0	1	0	0	0	0	0	0	0	1
atracurium besilate	0	0	0	0	0	0	0	0	1	0	0	0	0	0	0	0	0	0	1	1	0	0	0	0	0	1	0	0	0	0	0	0	0	0	0	1	0	1	1	0	0	0	0	0	0	0	0	0	0
atropine	0	0	0	0	0	0	0	0	1	0	0	0	0	1	0	0	1	1	1	1	0	0	0	0	0	1	1	1	1	1	1	0	1	0	1	0	1	0	1	0	0	0	1	0	1	0	0	0	0
atropine methonitrate	0	0	0	0	0	0	0	0	1	0	0	0	0	0	0	1	0	0	1	1	0	0	0	0	0	0	0	0	1	1	0	0	0	1	0	0	0	0	1	0	1	0	0	0	0	0	0	0	0
atropine oxide	0	0	0	0	0	1	1	1	1	0	0	0	0	0	1	0	0	0	0	0	0	0	0	0	0	1	0	1	0	1	0	0	1	0	0	0	0	0	0	0	0	0	0	0	0	0	0	0	0
azacitidine	0	0	1	0	0	0	1	0	1	1	0	1	1	1	1	0	1	0	0	0	1	0	0	0	0	0	0	0	0	0	1	0	0	0	0	0	1	1	0	0	0	0	1	0	0	0	0	0	0
azacyclonol	1	0	1	1	0	0	0	0	0	1	1	1	1	0	1	1	1	0	0	0	0	1	1	1	0	0	0	1	1	1	1	0	0	0	1	0	0	0	0	1	0	0	1	1	0	1	1	0	0
azaperone	0	0	0	0	0	0	0	0	0	0	0	0	0	0	1	0	0	0	1	0	0	0	0	1	0	0	0	0	0	0	0	0	0	1	0	0	0	0	0	0	1	0	0	0	0	0	0	0	0
azapropazone	0	0	0	0	0	0	1	0	0	0	0	0	0	0	0	0	0	1	0	1	0	0	0	0	0	0	0	0	1	0	0	0	0	0	0	0	0	1	0	0	1	0	1	0	0	0	0	0	0
azathioprine	0	0	0	0	1	0	0	0	0	1	1	1	0	0	0	0	0	1	0	1	1	1	0	0	1	1	0	0	0	0	0	0	1	1	0	1	0	0	0	0	0	0	1	0	0	1	0	0	1
azlocillin	0	0	0	0	0	0	0	0	0	0	0	0	0	1	0	0	0	1	0	0	0	0	0	0	0	1	0	0	0	0	0	1	0	0	1	0	0	0	0	0	0	0	1	0	1	0	0	0	0
aztreonam	0	1	0	0	0	0	0	0	0	0	0	0	0	0	1	1	0	0	0	1	0	0	0	0	0	0	1	0	0	1	0	0	0	0	1	0	0	1	0	1	0	0	0	1	0	0	0	0	0
bacampicillin	0	0	0	0	0	0	1	0	1	0	0	0	0	0	0	0	0	0	0	1	1	1	0	0	0	0	0	1	0	0	0	0	0	1	0	1	0	1	0	0	0	1	0	0	0	0	0	0	0
bacitracin	1	0	0	0	0	1	1	0	0	0	0	0	0	0	1	0	0	1	0	0	0	0	1	0	0	0	0	1	0	0	0	1	0	0	0	0	0	0	0	0	0	1	0	0	0	0	0	0	0
baclofen	0	0	0	0	0	0	0	0	0	0	0	0	1	1	0	0	1	0	0	0	0	0	1	0	0	1	0	0	1	1	0	0	1	0	1	0	1	0	1	1	0	0	1	1	1	0	0	0	0
bambuterol	0	0	0	0	0	0	0	0	1	0	0	0	0	1	0	0	0	0	0	1	0	0	0	0	0	1	0	1	0	0	0	0	0	0	0	0	0	0	0	0	0	0	0	0	0	0	0	0	0
BAS-012416453	0	1	1	1	0	1	0	1	1	0	0	0	1	0	0	0	0	0	1	0	0	0	0	0	0	0	0	0	0	1	0	0	1	0	0	0	1	0	1	0	0	0	1	0	0	1	1	0	0
BCB000038	1	0	0	0	0	0	0	0	0	0	0	0	0	1	1	0	1	1	0	1	0	0	1	1	0	1	0	0	1	1	0	1	0	0	1	0	1	1	1	0	1	0	1	0	1	0	0	0	0
BCB000039	1	0	0	0	0	0	0	0	0	0	0	0	0	1	1	0	1	0	0	0	0	0	1	1	1	1	1	1	1	0	0	1	0	0	1	0	0	1	1	1	0	0	1	0	1	1	0	0	0
BCB000040	0	0	0	0	0	0	0	0	0	1	0	0	0	0	1	0	0	0	0	1	1	0	0	1	0	0	0	1	0	0	0	0	0	0	0	0	0	1	0	0	0	0	0	0	0	0	0	0	0
beclometasone	0	0	0	0	0	0	0	0	1	0	0	0	0	0	1	0	0	1	1	0	0	0	0	1	0	1	1	1	1	0	0	0	0	0	0	0	1	0	0	1	1	0	1	0	0	0	0	0	1
bemegride	0	0	0	0	0	0	0	0	0	0	0	0	0	0	0	0	0	1	0	0	0	0	0	1	0	1	0	0	0	0	0	1	0	0	1	0	0	1	1	0	0	0	0	0	0	0	0	0	1
bendroflumethiazide	0	0	0	0	0	0	1	1	1	0	0	0	0	0	0	0	0	0	1	0	0	0	0	1	0	0	0	0	0	0	0	1	1	1	0	0	0	1	0	0	0	1	0	0	1	0	0	0	1
benfluorex	1	0	0	0	0	1	0	0	0	1	0	0	0	0	1	0	0	0	0	1	0	1	1	0	0	1	0	0	0	0	0	0	0	0	0	0	0	0	0	0	0	0	0	1	0	0	1	0	0
benfotiamine	0	0	0	0	0	0	0	1	1	0	0	1	0	0	1	1	0	0	0	0	0	0	1	0	0	0	1	0	0	1	0	0	0	0	0	0	0	0	0	1	1	0	0	1	1	0	0	0	0
benperidol	1	0	0	1	0	0	0	0	0	0	0	0	1	1	1	1	1	1	0	0	0	0	1	1	0	1	1	0	1	1	1	1	0	0	1	0	1	0	0	1	1	0	1	0	1	0	0	0	0
benserazide	1	0	0	0	0	1	0	0	0	0	0	0	0	0	0	0	0	1	0	0	0	0	0	1	0	1	1	0	1	0	0	1	0	0	0	0	0	1	1	0	1	0	0	0	1	0	0	0	1
benzamil	0	0	0	0	0	0	1	0	0	1	0	1	1	0	0	0	0	1	0	0	1	1	0	0	1	0	0	0	0	1	1	0	0	1	0	0	0	0	0	0	0	0	1	0	0	0	1	1	0
benzathine benzylpenicillin	0	0	0	0	0	1	0	1	1	0	0	0	0	0	0	1	0	0	0	1	0	0	0	0	0	0	0	0	1	0	0	0	0	0	0	0	0	0	1	0	1	0	0	0	0	0	0	0	0
benzbromarone	0	0	0	0	0	0	1	0	0	0	0	0	0	0	0	0	0	1	1	1	0	0	0	1	0	1	0	0	0	0	0	1	1	1	1	0	0	0	0	0	0	0	0	0	0	0	0	0	0
benzethonium chloride	0	0	0	1	0	0	1	0	0	1	0	1	1	0	0	0	1	1	1	0	0	1	1	0	1	1	0	1	0	0	1	0	1	0	0	0	1	0	0	0	0	0	1	0	0	1	1	0	0
benzocaine	0	0	0	0	0	0	1	0	0	0	0	0	0	1	0	0	0	0	0	1	1	0	1	0	0	0	0	0	1	0	0	0	1	0	0	0	0	1	0	1	0	0	0	0	0	1	0	0	0
benzonatate	0	0	0	0	0	0	0	0	0	0	0	0	0	0	0	0	0	0	1	0	1	0	0	0	0	0	0	0	0	1	0	0	0	0	0	0	0	1	0	0	0	0	0	0	0	0	0	0	0
benzthiazide	1	1	0	0	0	0	0	0	0	0	0	0	1	0	0	1	0	0	0	0	0	0	0	0	0	0	0	0	1	1	0	0	0	0	0	0	0	0	1	0	0	1	0	0	0	0	0	0	0
benzydamine	0	0	0	1	0	1	0	1	1	0	1	0	0	0	0	1	0	0	1	0	1	0	0	0	0	0	0	1	0	0	0	0	0	1	0	0	0	0	0	0	0	0	0	0	0	0	0	0	0
benzylpenicillin	0	0	0	0	0	0	0	0	1	0	0	0	0	1	0	0	0	1	1	0	0	0	0	1	0	0	0	1	1	0	1	1	0	0	1	0	0	0	0	0	0	0	0	0	0	1	0	0	0
bephenium hydroxynaphthoate	0	0	0	0	0	0	0	0	1	0	0	0	0	0	1	0	0	0	0	0	0	0	0	0	0	0	1	1	0	0	0	1	1	0	0	0	0	0	0	0	0	0	0	0	0	1	0	0	0
bepridil	1	1	1	1	0	0	0	0	0	1	0	1	1	0	0	0	1	1	0	0	0	1	1	1	1	0	0	1	0	0	1	1	0	0	1	0	0	0	0	1	0	0	1	1	1	1	1	0	0
berberine	0	0	0	0	0	0	0	0	0	0	0	1	1	1	0	0	1	0	1	0	0	0	1	1	0	1	0	0	0	0	1	1	1	0	1	0	1	1	1	1	0	0	1	1	1	1	0	0	0
bergenin	0	0	0	0	0	0	0	0	0	0	0	0	0	0	0	0	0	1	1	1	0	0	0	0	0	1	0	0	0	0	0	1	0	0	0	0	0	0	1	0	0	0	0	0	0	0	0	0	1
beta-escin	1	1	1	1	0	0	0	0	0	1	0	0	0	0	0	0	1	0	0	0	0	1	1	0	1	0	0	0	1	0	0	0	0	1	1	1	0	0	1	1	0	0	0	1	0	1	1	0	0
betahistine	1	1	0	0	0	0	0	1	0	0	0	0	1	0	1	1	0	0	1	0	0	0	0	1	0	0	1	0	0	0	0	0	0	0	0	0	0	0	0	0	1	0	0	0	1	0	0	0	1
betamethasone	0	0	0	0	0	1	1	0	1	0	0	0	0	0	1	0	0	0	0	0	0	0	1	0	0	0	0	0	0	1	0	1	1	1	0	0	0	0	0	0	1	0	0	0	0	0	0	0	1
betaxolol	1	1	0	0	0	0	0	0	0	0	0	0	0	1	1	1	0	1	1	0	0	0	0	1	0	1	0	1	0	0	1	1	0	0	1	0	1	1	1	1	0	0	1	0	1	1	0	0	0
betazole	0	0	0	0	0	0	0	0	1	0	0	1	0	0	0	0	0	1	1	0	0	0	1	0	0	1	1	0	0	0	0	1	0	0	1	0	0	0	0	0	0	0	0	0	1	0	0	0	0
bethanechol	0	0	0	0	1	1	1	1	1	0	0	0	0	0	0	0	0	0	0	0	0	0	0	0	0	1	0	0	0	0	0	0	1	0	0	0	0	0	0	0	0	0	0	0	1	0	0	0	0
betonicine	0	0	0	0	0	0	1	1	0	0	0	0	0	0	0	0	0	0	0	0	1	0	0	0	0	0	0	1	1	0	0	0	1	0	0	0	0	0	0	1	0	0	0	0	0	0	0	0	0
betulin	0	0	0	0	0	0	0	0	0	0	0	0	0	0	0	1	0	0	0	1	0	1	0	0	0	0	1	1	0	1	0	0	0	1	0	0	0	0	0	0	0	0	0	0	0	0	0	0	1
betulinic acid	1	0	0	1	1	1	1	1	0	1	1	0	0	0	0	0	0	0	0	1	1	0	0	0	0	0	0	0	0	0	0	0	0	1	0	1	0	1	0	0	1	0	1	0	0	0	0	0	0
bezafibrate	1	1	0	0	0	0	0	0	0	0	0	0	1	0	1	1	0	1	0	0	0	0	0	1	0	1	0	1	0	0	0	1	0	1	0	0	0	1	0	0	0	0	0	0	1	0	0	0	0
bicuculline	0	0	0	0	0	0	0	0	0	0	0	0	0	0	0	0	0	0	0	0	0	0	0	0	0	1	0	0	0	1	0	0	0	1	0	0	0	0	0	0	0	0	0	0	1	0	0	0	1
biotin	0	0	0	0	0	0	0	0	1	0	0	0	0	0	1	0	0	0	0	1	0	0	1	0	0	0	0	0	0	0	0	0	1	1	0	0	0	0	0	0	0	0	0	0	1	0	0	0	1
biperiden	0	0	0	0	0	0	0	0	0	0	0	0	0	0	0	0	0	0	0	1	1	0	1	0	0	0	0	0	1	0	0	0	0	1	0	0	0	0	0	0	0	0	1	1	0	0	0	0	0
bisacodyl	0	0	0	0	0	0	0	0	0	0	0	1	0	0	0	0	1	0	0	0	0	1	0	0	1	0	0	0	0	0	1	0	0	1	0	0	0	0	1	1	0	0	0	1	0	1	1	0	0
bisoprolol	0	1	0	0	0	0	0	0	0	0	0	0	0	0	0	0	0	1	1	0	0	0	0	1	0	0	1	0	0	1	0	1	0	1	0	0	0	0	0	0	1	0	0	0	0	0	0	0	0
blebbistatin	0	1	0	0	0	0	0	0	0	1	0	0	1	0	1	0	0	0	0	0	0	0	1	0	0	0	0	0	0	1	0	1	0	1	1	0	0	0	1	0	1	0	0	0	1	0	0	0	1
boldine	0	1	0	0	0	1	1	1	0	0	0	0	1	0	0	0	0	0	1	0	0	0	0	0	1	0	0	0	0	1	0	0	1	0	0	0	0	0	0	0	0	0	0	0	0	0	0	1	0
bretylium tosilate	0	0	0	0	0	0	1	0	1	0	0	0	0	0	0	0	0	0	0	0	1	1	0	0	0	0	0	0	0	0	0	0	1	1	0	0	0	1	0	1	0	0	0	0	0	1	0	0	0
brinzolamide	0	0	0	0	0	1	0	0	0	0	0	0	0	0	0	0	0	0	0	0	0	0	1	0	0	1	0	0	0	1	0	1	1	0	0	0	0	1	0	0	0	0	0	0	1	0	0	0	1
bromocriptine	1	1	0	1	0	0	0	0	0	1	1	1	0	0	0	0	0	1	0	0	0	0	0	1	0	0	1	1	0	0	0	0	0	0	0	0	1	1	0	1	0	0	0	0	0	0	1	0	0
bromopride	0	0	0	0	0	0	0	0	0	0	0	0	0	0	0	0	0	1	0	1	0	0	0	0	0	0	0	1	0	0	0	1	0	1	0	0	0	0	0	0	0	0	1	1	1	0	0	0	0
bromperidol	1	1	0	1	0	0	0	1	0	1	0	0	1	0	1	0	0	0	0	0	1	0	0	0	0	0	1	1	0	0	0	1	0	0	0	1	0	0	0	0	0	0	0	1	1	1	0	0	0
brompheniramine	0	0	0	0	0	1	1	1	0	0	1	0	0	0	0	1	0	0	0	0	0	0	0	0	0	1	0	0	1	1	0	0	1	0	1	0	1	0	0	1	1	0	1	1	1	0	0	0	1
bucladesine	0	0	0	0	0	0	1	0	0	0	0	0	0	0	0	0	0	0	0	1	1	1	0	0	0	0	1	0	0	0	0	0	0	0	0	0	0	0	0	0	0	0	0	0	0	0	1	0	0
budesonide	1	0	0	0	0	0	0	0	0	0	0	0	1	0	0	0	0	1	0	0	0	0	0	0	0	1	0	1	0	0	0	1	0	0	0	0	0	1	1	0	0	0	1	0	1	0	0	0	0
bufexamac	0	0	0	1	0	0	0	0	1	0	0	1	0	0	0	1	0	0	1	0	0	0	0	0	0	0	0	1	0	0	0	0	0	0	0	0	1	0	0	0	0	0	0	1	0	0	1	0	0
buflomedil	1	0	0	0	0	0	1	1	0	0	0	0	0	1	0	0	0	0	0	1	0	0	0	1	0	0	0	1	0	0	0	0	1	1	1	0	0	1	0	0	0	0	0	1	1	0	0	0	0
bumetanide	0	0	0	0	1	1	1	1	1	0	0	0	1	0	0	0	0	1	1	0	0	1	0	0	0	1	1	1	0	0	0	0	1	0	1	0	0	1	0	0	1	0	0	0	0	0	0	0	0
bupivacaine	0	0	0	0	0	0	0	0	0	0	0	0	0	0	0	0	0	0	0	0	0	0	0	0	0	0	0	1	0	0	0	0	0	0	0	0	0	1	0	0	0	0	0	0	0	0	0	0	0
bupropion	0	0	1	0	0	0	0	0	0	0	0	0	1	1	0	0	0	0	0	0	0	0	0	0	0	1	0	0	0	0	0	1	0	0	1	0	0	0	0	1	0	0	1	0	1	1	0	0	0
buspirone	0	0	0	0	0	0	0	0	1	0	0	0	0	0	0	1	0	0	1	0	0	0	0	0	0	1	0	0	0	1	0	0	0	0	0	0	0	0	0	0	1	0	0	0	0	0	0	0	0
butacaine	1	1	0	0	0	1	0	0	0	0	0	0	0	0	1	1	0	0	0	0	0	0	0	1	0	0	0	1	0	0	0	0	0	0	0	0	0	0	0	0	0	1	0	1	1	0	0	0	0
butamben	0	0	0	1	1	1	1	0	0	1	1	0	0	0	0	0	0	1	0	0	0	0	0	0	0	1	0	0	0	0	0	1	0	0	0	0	0	1	1	0	0	1	0	0	0	0	1	0	1
butein	1	1	1	0	1	0	0	0	0	1	1	1	1	1	0	1	1	1	1	0	0	0	0	1	1	0	0	1	1	0	1	1	1	0	1	1	1	0	0	1	0	1	1	0	0	0	0	1	0
butirosin	0	0	0	0	0	0	1	0	0	0	0	0	0	0	0	0	0	0	0	0	0	0	0	0	0	0	0	0	0	0	0	0	0	0	0	0	0	1	0	0	1	0	0	0	0	0	1	0	1
butoconazole	0	1	1	1	0	0	0	0	0	1	1	1	1	1	0	0	0	1	1	0	1	0	1	0	0	0	0	1	0	1	1	1	0	0	0	0	1	0	0	1	0	0	1	0	0	1	1	0	0
butyl hydroxybenzoate	1	1	0	0	0	1	0	1	1	1	1	0	0	0	1	1	0	0	1	0	0	1	0	1	0	0	1	0	0	1	0	0	0	0	0	0	0	1	0	1	1	1	0	0	0	0	0	0	0
BW-B70C	0	0	0	0	0	0	0	0	1	1	1	1	0	0	0	0	0	0	0	1	0	1	1	0	1	1	0	1	0	0	1	0	0	1	0	1	1	0	1	0	0	0	1	0	0	1	1	0	0
C-75	0	1	0	0	1	0	0	0	0	0	0	0	0	1	1	0	1	0	1	0	0	1	1	0	1	1	0	1	1	1	0	0	1	0	0	1	1	0	1	1	0	0	0	1	1	1	0	1	0
caffeic acid	1	1	0	0	0	0	0	0	0	0	0	0	1	0	0	0	0	1	0	0	0	0	0	1	0	1	1	0	1	0	0	1	0	0	1	0	0	1	1	0	1	0	0	0	0	0	0	0	1
calcium folinate	0	0	0	0	1	1	1	0	0	0	0	0	0	0	0	0	0	0	0	1	1	1	0	0	0	0	1	0	1	0	0	0	1	0	0	0	0	1	0	0	1	0	0	0	0	0	0	0	1
calcium pantothenate	1	1	0	0	0	0	0	0	0	0	0	0	0	0	0	0	0	0	0	0	0	0	1	0	0	0	0	1	1	0	0	0	0	0	0	0	0	0	1	1	0	0	0	0	0	0	0	0	0
calmidazolium	1	1	1	1	1	0	0	0	1	1	0	1	1	0	1	1	1	0	1	1	0	1	1	1	1	0	1	1	0	1	1	1	0	0	1	1	0	0	1	1	0	0	1	1	0	1	1	0	0
calycanthine	0	1	0	1	0	1	1	1	1	0	0	0	0	0	0	0	0	0	1	0	0	0	0	0	0	0	1	0	0	1	0	0	1	0	0	0	0	1	0	1	0	0	0	0	0	0	0	0	0
camptothecin	0	0	1	0	0	0	0	0	0	0	0	1	0	1	1	0	1	0	0	0	1	1	0	0	1	0	0	0	0	0	1	0	0	0	0	0	1	1	0	0	0	0	1	0	0	0	0	0	0
canadine	0	1	0	0	0	1	1	1	0	0	0	0	0	0	0	0	0	0	1	0	0	0	0	1	0	0	1	1	0	0	0	0	1	0	0	0	0	1	0	0	0	0	0	0	0	0	0	0	0
canavanine	0	0	0	0	0	0	0	0	0	0	0	0	0	1	0	1	1	1	0	0	0	0	1	1	1	1	0	0	1	1	0	1	0	0	1	0	0	0	1	1	1	0	1	0	1	1	0	0	1
canrenoic acid	0	0	0	0	0	0	0	0	0	0	0	0	0	0	1	1	0	0	0	0	0	0	1	0	0	1	0	1	1	0	0	0	0	0	0	0	0	0	1	1	0	0	1	0	0	0	0	0	1
cantharidin	1	1	0	0	0	0	0	0	0	0	0	0	1	1	0	0	1	0	0	0	0	1	0	1	0	0	0	0	0	1	1	1	0	0	1	0	1	0	0	1	0	0	1	0	1	1	0	1	0
capsaicin	1	1	1	0	0	0	0	0	0	0	1	0	0	0	1	1	0	1	1	0	0	0	0	1	0	0	1	1	0	1	0	1	0	0	0	0	1	0	0	1	0	0	0	0	1	0	0	0	0
captopril	1	0	0	0	0	1	0	1	0	0	0	0	0	0	1	1	0	0	1	1	1	0	1	0	0	0	0	1	0	1	0	1	0	0	0	0	0	0	1	0	1	0	0	0	1	0	0	0	0
carbachol	0	0	0	0	0	0	0	0	0	0	0	0	0	1	0	0	0	1	1	0	0	0	0	0	0	1	1	0	0	0	0	1	1	0	1	0	0	0	0	1	0	0	1	0	0	0	1	0	1
carbamazepine	0	0	0	0	1	0	1	0	0	1	1	0	0	0	1	0	0	0	0	0	1	0	0	0	0	0	0	0	0	0	0	1	0	1	0	0	0	0	0	0	0	0	0	0	0	0	0	0	0
carbarsone	0	0	0	0	0	0	0	0	1	0	0	0	0	0	0	0	0	0	1	0	0	0	0	0	0	1	0	0	0	1	0	0	1	0	1	0	0	0	0	0	1	0	0	0	0	0	0	0	0
carbenoxolone	0	0	0	0	0	0	0	0	0	0	0	0	0	0	1	0	0	0	0	0	0	0	0	0	0	0	0	1	0	0	0	0	0	0	0	0	0	1	0	0	1	0	0	0	0	0	0	0	0
carbimazole	0	0	0	0	0	1	0	1	1	0	0	0	0	0	0	0	0	0	1	0	0	0	0	0	0	0	1	0	0	1	0	0	1	0	0	1	0	0	0	0	1	0	0	1	0	0	0	0	1
carbinoxamine	0	0	0	0	0	0	0	0	1	0	0	0	1	0	0	1	0	1	1	0	0	0	1	0	0	1	0	0	0	1	0	1	0	1	1	0	0	0	1	0	1	0	1	0	0	0	0	0	1
carcinine	1	1	0	0	0	0	0	0	0	0	0	0	1	0	0	0	0	1	1	0	0	0	1	0	0	1	1	0	0	1	0	1	0	0	0	0	0	0	0	0	1	0	0	0	1	0	0	1	0
carisoprodol	0	1	0	0	0	0	0	1	1	0	0	0	1	0	0	1	0	0	1	0	0	0	0	0	0	1	0	0	1	1	0	0	0	0	0	0	0	0	1	1	0	0	0	0	0	0	0	0	0
carmustine	0	1	1	0	1	1	0	0	0	1	0	0	1	0	0	0	0	0	1	1	0	0	0	0	0	1	0	0	0	0	0	1	1	0	1	1	0	0	1	0	0	0	0	0	0	0	0	0	0
carteolol	1	0	0	0	0	1	1	0	0	0	0	0	0	0	0	0	0	1	0	0	0	0	0	0	0	1	0	1	0	0	0	1	0	1	0	0	0	0	0	0	0	0	0	0	1	0	0	0	0
CAY-10397	1	1	0	0	0	0	0	0	0	0	0	0	0	1	1	0	0	0	0	0	0	0	0	1	0	0	0	0	0	0	0	0	0	1	1	0	0	0	1	0	0	0	0	0	0	0	0	0	0
cefaclor	1	0	0	0	0	0	0	0	0	0	0	0	0	0	0	1	0	0	0	1	0	0	0	1	0	0	1	0	1	0	0	0	0	1	0	0	0	1	0	0	0	0	0	0	1	0	0	0	0
cefadroxil	0	0	0	0	0	0	0	0	0	0	0	1	0	0	0	1	0	1	0	0	0	0	0	1	0	1	0	1	0	0	0	1	0	0	0	0	0	1	0	0	0	0	1	0	1	0	0	0	0
cefalexin	1	1	0	0	0	0	0	0	0	0	0	0	0	0	0	1	0	0	0	0	0	0	1	1	0	1	0	0	0	0	0	1	0	0	0	0	0	1	0	0	0	0	0	0	1	0	0	0	0
cefalonium	0	0	0	0	0	0	0	0	1	0	0	0	0	0	0	0	0	1	1	0	0	0	0	0	0	1	0	0	1	1	0	0	0	1	1	0	0	0	1	0	1	0	0	0	1	0	0	0	1
cefalotin	0	1	0	0	0	0	0	0	0	0	0	0	0	0	1	0	1	1	1	0	0	0	1	0	0	0	0	1	0	1	0	1	0	1	1	0	0	0	0	0	0	0	1	1	0	0	0	0	0
cefamandole	0	0	0	0	0	0	1	0	0	0	0	0	0	0	0	0	0	0	0	1	1	1	0	0	0	0	0	0	0	1	0	0	1	1	1	0	0	1	0	0	1	0	0	0	0	0	0	0	1
cefapirin	0	0	0	0	0	0	0	0	1	0	0	0	0	0	0	0	0	1	1	0	0	0	0	0	0	0	0	1	0	0	0	0	0	1	0	0	0	1	0	0	0	0	0	0	0	0	0	0	1
cefazolin	0	0	0	0	0	0	0	0	0	0	0	0	0	0	0	0	0	0	1	1	1	0	0	0	0	0	0	0	0	0	0	0	0	0	0	0	0	0	0	0	0	0	0	0	0	1	0	0	1
cefepime	0	0	0	0	0	0	0	1	1	0	0	0	0	0	1	0	0	0	0	0	1	0	0	0	0	0	1	0	0	0	0	0	0	0	0	0	0	1	0	0	1	0	0	0	0	0	0	0	0
cefixime	1	1	0	0	0	0	0	0	0	0	0	0	0	0	0	0	0	1	0	0	0	0	0	1	0	0	0	1	0	0	0	1	0	1	0	0	0	0	0	0	0	1	0	0	0	0	0	1	0
cefmetazole	0	0	0	0	0	0	1	0	0	0	0	0	0	0	0	0	0	1	0	1	0	1	0	0	0	1	0	0	0	0	0	0	1	0	1	0	0	0	0	0	0	0	0	0	1	0	0	1	1
cefoperazone	0	0	0	1	0	1	1	1	0	0	0	0	0	0	0	0	0	0	0	0	0	0	0	0	0	0	0	1	0	0	0	0	0	0	0	0	0	1	0	0	0	0	0	0	0	0	1	0	1
ceforanide	0	1	0	0	0	0	0	0	0	0	0	0	1	0	0	0	0	1	1	0	0	0	0	1	0	0	0	0	0	0	0	0	1	0	1	0	0	1	0	0	1	0	0	0	1	0	0	0	0
cefotaxime	0	1	0	0	0	1	0	1	0	0	0	0	0	0	0	1	0	0	1	0	1	0	0	0	0	0	1	0	0	1	0	0	0	0	0	0	0	0	0	0	1	0	0	0	0	0	0	0	1
cefotetan	0	0	0	0	0	0	0	0	1	0	0	0	0	0	1	1	0	0	1	1	0	0	0	0	0	0	0	0	0	1	0	0	0	1	1	0	0	0	0	0	1	0	0	0	0	0	0	0	0
cefotiam	0	0	0	0	0	1	1	0	1	0	0	0	0	0	0	0	0	1	0	0	1	0	0	1	0	0	1	0	0	0	0	1	0	1	0	0	0	0	0	0	1	0	0	0	0	0	0	0	0
cefoxitin	0	0	0	0	0	0	1	1	0	0	0	0	0	0	0	0	0	0	0	0	1	0	0	0	0	0	0	1	0	0	0	0	0	1	0	0	0	1	0	0	0	0	1	0	0	0	0	0	0
cefsulodin	1	1	0	0	0	0	0	0	0	0	0	0	0	0	0	1	0	1	0	0	0	0	0	0	0	0	0	1	0	0	0	1	0	1	0	0	0	1	0	0	0	0	0	0	1	0	0	0	1
ceftazidime	0	1	0	0	0	0	0	0	0	0	0	0	0	0	0	0	1	0	1	0	0	0	0	0	0	1	1	1	1	0	0	0	1	0	0	0	0	0	0	1	1	0	1	0	0	0	0	0	0
cefuroxime	0	0	0	0	0	0	0	0	0	0	0	0	0	0	0	0	0	1	0	0	0	0	0	0	0	0	0	1	1	0	0	0	0	0	0	0	0	0	1	0	1	0	0	0	0	0	0	0	1
celastrol	0	1	1	0	1	0	0	0	0	1	1	0	1	0	0	0	1	0	1	0	0	0	1	1	0	1	1	0	1	1	1	0	0	0	1	1	1	0	0	1	0	0	1	1	0	1	1	1	0
celecoxib	0	0	0	0	1	1	1	1	0	1	0	0	0	0	0	1	0	0	1	0	0	0	0	0	0	0	1	0	0	0	0	0	1	1	0	0	0	0	1	0	1	0	0	0	0	1	1	0	0
cephaeline	1	1	0	0	0	0	0	0	1	0	0	0	1	0	0	1	0	0	1	1	0	1	1	1	0	1	1	0	1	1	1	1	0	0	1	0	0	0	1	1	1	0	0	0	1	1	0	1	0
cetirizine	1	1	0	0	0	0	0	0	0	0	0	0	0	0	1	0	0	1	0	0	0	0	0	0	0	1	0	0	0	0	0	1	0	0	0	0	0	0	0	0	0	0	0	0	1	0	0	0	0
chenodeoxycholic acid	0	0	0	0	0	1	1	1	0	0	1	0	0	0	1	0	0	0	1	0	0	0	0	0	0	1	0	0	0	0	0	0	0	0	0	0	0	0	0	0	0	0	0	0	0	0	0	0	0
Chicago Sky Blue 6B	0	0	0	0	0	1	0	0	0	0	0	0	0	0	0	1	0	0	0	0	0	0	1	0	0	1	0	0	1	1	0	0	0	0	0	0	1	0	0	1	0	0	1	1	1	0	0	0	1
chlorambucil	1	1	1	0	0	1	1	1	1	0	0	0	0	0	1	1	0	0	1	0	0	0	0	1	0	0	0	1	0	0	0	0	0	1	0	1	0	1	0	0	1	1	0	0	0	0	0	0	0
chloramphenicol	0	1	0	0	0	0	0	0	0	0	0	1	0	0	1	1	1	0	0	1	0	0	1	0	0	1	1	0	0	1	0	0	1	0	0	0	0	0	0	1	0	1	1	0	0	0	0	0	1
chlorcyclizine	0	0	1	1	0	0	0	0	1	1	1	1	0	0	0	0	0	1	0	1	0	1	1	0	1	0	0	1	0	1	1	0	1	0	0	0	0	0	1	1	0	0	1	1	0	1	1	0	1
chlorhexidine	1	1	0	0	0	0	0	0	0	1	0	1	0	0	1	1	1	1	0	1	0	0	1	0	1	1	0	0	1	1	1	0	0	0	0	0	1	0	1	1	0	0	1	1	1	0	0	0	0
chlormezanone	0	0	0	0	0	0	0	0	1	0	0	0	0	0	0	0	0	0	1	0	0	0	0	0	0	1	0	0	0	1	0	0	0	0	1	0	0	1	1	0	0	0	0	0	0	0	0	0	1
chlorogenic acid	0	0	0	0	0	1	1	1	0	0	1	0	0	0	0	0	0	0	0	0	0	0	0	0	0	0	0	1	1	0	0	0	0	0	0	0	0	1	0	0	1	0	0	0	1	0	0	0	1
chloropyramine	0	0	0	1	0	0	0	0	0	0	1	0	1	0	0	0	0	0	0	0	0	0	1	0	0	0	0	0	0	1	0	1	0	1	0	0	0	0	0	0	0	0	1	1	0	1	0	0	1
chloropyrazine	0	0	0	0	1	1	1	0	1	0	0	0	0	0	0	0	0	1	1	1	0	0	0	0	0	0	0	1	0	0	0	0	1	0	0	0	0	1	1	0	0	0	0	0	0	0	0	0	1
chloroquine	0	0	0	0	0	1	0	0	1	0	0	0	0	0	1	1	0	0	0	1	0	0	0	0	0	0	0	0	0	0	0	0	0	0	0	0	0	0	0	0	0	0	0	0	0	0	0	0	0
chlorphenamine	0	0	0	0	0	0	1	1	0	0	1	0	0	0	1	0	0	0	0	0	1	0	0	0	0	0	0	0	0	0	0	0	0	1	0	0	0	0	0	0	1	0	0	0	0	0	0	0	1
chlorphenesin	1	0	0	0	0	0	0	0	0	0	0	1	0	1	0	1	1	1	0	0	0	0	1	1	1	1	0	1	1	0	0	1	0	0	1	0	1	0	0	0	0	0	1	1	1	1	0	0	0
chlorpromazine	0	0	1	1	0	0	1	0	0	1	1	1	1	0	1	0	0	0	1	0	0	0	1	1	0	1	0	0	0	1	1	1	1	0	0	0	1	0	1	0	0	0	1	1	0	1	0	0	0
chlorpropamide	1	0	0	0	0	0	0	0	0	0	0	0	0	0	0	0	0	0	0	1	0	0	1	0	0	1	0	0	0	0	0	0	0	0	0	0	0	1	0	0	1	0	1	0	0	0	0	1	0
chlorprothixene	0	0	0	1	0	0	0	0	1	1	1	1	1	0	0	1	0	0	0	1	0	1	1	0	0	1	0	1	0	1	1	0	1	0	0	0	0	0	1	0	0	0	1	1	1	1	1	0	0
chlortalidone	0	0	0	0	0	1	0	0	1	0	0	0	0	0	0	0	0	0	0	0	0	0	0	0	0	0	1	1	0	0	0	0	0	0	0	0	0	1	0	0	1	1	0	0	0	0	0	0	0
chlortetracycline	1	1	1	0	0	0	0	0	0	0	0	0	1	1	1	1	1	1	0	0	0	0	1	1	1	1	1	0	1	1	0	1	0	0	1	0	0	1	1	1	1	0	1	1	1	0	0	0	0
chlorzoxazone	0	1	1	0	0	0	0	0	0	0	0	1	1	1	0	0	1	1	1	0	0	0	1	1	0	1	1	1	1	1	1	1	1	0	1	0	1	0	1	1	1	0	1	1	1	1	0	0	0
chrysin	0	0	1	0	0	0	1	1	0	0	1	0	1	0	1	0	0	1	0	0	1	1	0	0	1	0	0	0	0	0	1	0	0	0	0	0	1	1	0	1	0	0	1	0	0	1	0	1	0
ciclacillin	0	1	0	0	0	0	0	0	0	0	0	0	0	0	0	1	0	0	1	1	0	0	1	0	0	0	0	0	1	1	0	0	0	0	0	0	0	0	1	0	0	0	0	0	1	0	0	0	0
cicloheximide	0	1	0	0	0	0	0	0	1	0	0	0	1	0	0	0	1	0	1	1	0	1	1	1	0	1	0	0	0	1	1	1	0	0	1	0	0	0	0	0	1	0	0	0	0	0	1	1	0
ciclopirox	0	0	1	1	0	0	0	0	0	1	0	1	0	1	0	0	1	1	0	0	1	0	1	0	0	0	1	0	1	0	1	1	1	0	0	0	1	0	0	0	0	0	0	1	0	1	1	1	0
ciclosporin	0	0	1	1	0	0	0	0	0	1	1	0	1	0	0	1	0	1	0	1	0	0	0	0	0	0	0	0	0	1	1	0	0	1	1	0	1	1	0	1	0	0	1	0	0	0	0	0	0
cimetidine	1	1	0	0	0	0	0	0	0	0	0	0	0	0	1	1	0	0	1	1	0	0	0	1	0	0	1	1	0	1	0	0	0	1	0	0	0	0	0	1	0	0	0	0	0	0	0	0	0
cinchocaine	0	0	0	1	0	0	0	0	0	1	0	0	0	0	0	0	0	0	0	0	1	0	0	1	0	0	0	0	0	0	0	1	0	0	0	1	0	1	0	0	0	0	0	0	0	1	1	0	0
cinchonidine	0	0	0	0	0	0	0	0	1	0	0	1	0	0	0	1	0	0	1	1	1	0	0	0	0	0	1	0	1	1	0	0	0	0	0	1	0	0	1	0	1	0	0	1	0	0	0	0	1
cinchonine	0	1	0	0	0	1	0	1	1	0	0	1	1	0	0	1	0	0	1	0	0	0	0	0	0	1	1	1	0	1	0	0	0	0	0	1	0	0	0	0	1	0	0	0	0	0	0	0	0
cinnarizine	0	0	0	0	0	0	0	0	0	0	0	0	1	0	0	1	0	0	1	0	0	0	0	0	0	1	0	1	0	1	0	0	1	1	0	0	0	0	0	0	1	0	1	0	0	0	0	0	0
cinoxacin	1	1	0	0	0	0	0	0	0	0	0	0	0	0	1	1	0	0	0	0	0	0	0	1	0	1	1	0	1	0	0	0	0	0	0	0	0	0	0	1	0	0	0	0	0	0	0	0	1
ciprofibrate	0	0	0	0	0	1	0	0	1	0	0	0	0	0	0	1	0	0	1	1	0	0	0	0	0	1	0	0	0	0	0	0	0	0	0	0	0	0	1	0	0	0	0	0	1	0	0	0	1
ciprofloxacin	0	0	0	0	0	0	0	0	0	0	0	0	0	0	0	0	0	0	0	1	1	1	0	0	0	1	0	0	0	1	0	0	1	0	0	0	0	0	0	0	0	0	0	0	0	0	0	0	0
cisapride	0	0	0	1	0	1	1	1	0	1	1	0	0	0	0	0	0	1	1	0	1	0	0	1	0	0	0	0	1	0	0	0	0	0	0	0	1	1	1	0	1	0	0	0	0	0	1	0	1
citalopram	0	0	0	0	0	0	1	0	1	0	0	0	0	0	0	0	0	0	0	1	1	1	0	1	0	0	0	0	0	0	0	0	1	1	0	0	0	0	0	0	0	0	0	0	0	1	0	0	0
citiolone	0	0	0	0	0	0	1	0	1	0	0	0	0	0	1	0	0	0	0	0	1	0	0	0	0	0	0	1	0	0	0	0	0	1	0	0	0	0	0	0	0	0	0	0	0	0	0	0	0
clebopride	1	0	0	0	0	1	0	1	0	0	0	0	0	0	0	1	0	0	0	0	0	0	0	0	0	0	0	0	0	0	0	0	0	1	0	0	0	1	0	0	0	1	0	0	0	0	0	0	1
clemastine	0	0	0	1	0	1	0	0	0	1	1	1	0	0	0	0	0	1	0	1	1	0	0	0	0	0	1	0	1	0	1	0	1	0	0	0	0	0	0	0	0	0	0	1	0	1	0	0	0
clemizole	0	0	0	0	0	0	0	1	1	1	1	1	0	0	1	1	0	0	0	0	0	0	1	0	1	0	0	0	0	1	0	0	0	0	0	0	0	0	0	1	0	0	0	0	0	1	1	0	0
clenbuterol	0	0	0	1	0	0	0	0	0	0	0	0	0	0	0	0	0	0	0	0	0	0	1	0	0	0	0	0	0	0	0	1	0	0	0	0	0	0	1	0	0	1	0	1	0	0	1	0	1
clidinium bromide	0	0	0	0	0	0	1	0	0	0	0	0	0	0	0	0	0	0	1	1	1	0	0	0	0	0	0	0	0	0	0	0	0	1	0	0	0	0	0	0	0	1	0	0	0	0	0	0	0
clindamycin	0	1	0	0	0	0	0	0	0	0	0	0	0	0	0	1	1	0	1	0	0	0	1	0	0	0	1	0	0	1	0	1	0	1	1	0	1	0	0	1	1	0	1	1	0	0	0	0	0
clioquinol	0	1	1	0	0	0	0	0	0	1	0	1	1	0	1	1	1	0	0	1	0	1	1	0	0	0	1	1	1	1	1	0	0	0	1	1	0	0	0	1	1	0	1	0	1	0	0	0	0
clobetasol	1	0	0	1	0	0	0	0	0	0	0	0	0	0	0	0	0	1	1	0	0	0	0	0	0	0	1	0	1	0	0	1	0	0	0	0	0	0	1	0	0	0	1	0	0	0	0	0	0
clofazimine	0	1	0	0	0	0	0	0	0	1	1	1	0	0	0	0	1	1	0	1	0	0	1	0	1	1	1	0	0	0	0	0	1	0	0	1	0	0	0	0	0	0	1	1	0	1	1	0	0
clofibrate	0	1	1	0	0	0	0	0	1	0	0	1	0	1	0	1	1	1	0	0	1	0	1	0	1	1	1	0	1	0	1	1	1	0	1	0	1	0	0	0	1	0	1	0	1	1	0	0	0
clofilium tosylate	0	1	0	0	0	0	0	0	0	1	0	1	1	0	0	0	0	0	0	0	0	0	1	0	1	1	0	0	0	1	1	0	0	0	0	0	1	0	0	0	0	0	1	1	0	1	1	0	0
clomifene	1	1	0	1	0	0	0	0	1	1	0	1	1	0	1	1	1	1	1	0	0	1	1	1	1	1	0	0	0	0	1	1	0	0	0	0	0	0	0	0	0	0	1	0	1	1	1	0	0
clomipramine	0	0	1	1	0	0	1	1	0	1	1	1	1	1	0	0	1	0	0	1	1	0	1	0	1	1	0	1	1	0	1	1	1	0	0	0	1	0	0	1	0	0	1	1	0	1	1	0	0
clonidine	0	1	0	0	0	1	1	1	0	0	0	1	0	0	0	1	0	0	0	0	0	0	0	0	0	0	1	0	0	0	0	0	0	0	0	0	0	0	0	0	0	0	0	0	0	0	1	1	0
clopamide	1	0	0	0	0	0	0	1	0	0	0	0	0	0	1	1	1	0	1	0	0	0	1	1	0	1	1	0	1	1	0	0	0	0	1	0	1	0	1	1	0	0	1	0	1	0	0	0	0
cloperastine	0	1	1	0	0	0	0	0	1	1	1	1	1	0	0	1	1	1	0	0	0	1	1	1	1	0	0	1	1	0	1	0	0	0	0	1	0	0	0	1	0	0	1	1	0	1	1	0	0
clorgiline	1	0	0	0	0	0	1	0	0	1	0	0	0	0	0	0	0	0	0	0	1	1	0	1	0	0	0	0	0	0	0	1	0	0	0	0	0	1	0	0	0	0	0	0	0	1	1	1	0
clorsulon	0	0	0	0	0	1	0	1	0	0	0	0	0	0	1	1	0	0	0	1	0	0	0	0	0	1	0	0	0	1	0	0	1	0	0	0	0	0	0	0	0	0	0	0	0	0	0	0	0
clotrimazole	1	1	1	0	0	0	0	0	0	1	1	0	1	0	1	1	0	0	0	0	0	1	1	0	0	0	0	1	0	0	1	0	0	0	1	0	1	0	0	1	0	0	1	0	0	1	1	0	0
cloxacillin	0	0	0	0	0	0	1	0	0	0	0	0	0	0	0	0	0	0	0	0	1	0	0	1	0	0	0	0	0	0	0	1	0	0	0	1	0	1	0	0	0	0	0	0	0	0	0	0	0
clozapine	0	1	0	1	0	0	0	1	0	0	1	1	0	0	0	1	0	0	1	1	1	0	1	0	0	0	0	0	0	1	0	0	0	0	0	0	0	0	0	1	0	0	0	1	0	1	0	1	0
cobalt chloride	0	0	0	1	1	1	1	1	0	0	1	1	0	0	0	0	0	0	0	0	1	0	1	0	0	0	0	0	0	0	0	0	1	0	0	1	0	0	0	0	1	1	0	0	0	0	0	1	0
co-dergocrine mesilate	0	0	0	1	0	0	1	0	0	0	1	1	0	0	0	1	0	1	0	1	1	0	1	0	1	0	1	0	1	1	0	1	0	0	0	0	0	0	0	0	0	0	0	0	0	0	1	1	0
colchicine	1	1	0	0	0	0	1	0	0	1	0	0	1	0	0	1	1	0	0	0	0	0	1	1	1	0	1	0	1	1	0	1	0	0	1	0	0	1	0	0	0	0	0	1	0	1	1	0	1
colecalciferol	0	0	0	0	0	1	0	1	0	0	0	1	0	0	1	0	1	0	0	0	0	0	1	0	1	1	1	0	1	1	0	1	1	0	1	0	1	0	1	1	1	0	0	1	1	0	0	0	0
colforsin	0	0	0	0	0	0	1	0	0	0	1	0	0	1	1	0	0	1	0	0	1	0	0	0	1	0	0	0	1	0	0	1	1	0	0	0	1	0	0	0	0	0	0	0	1	0	1	0	0
colistin	0	0	0	0	0	0	0	0	0	0	0	0	0	0	0	1	0	0	0	1	1	0	0	0	0	0	0	0	0	0	0	0	1	0	0	0	0	0	0	0	0	0	0	0	1	0	0	0	1
conessine	0	1	0	1	0	0	0	0	0	0	0	0	0	0	1	0	0	0	0	1	1	0	1	0	0	0	0	1	0	0	0	0	1	0	0	0	0	0	0	0	0	0	0	0	0	0	0	0	1
convolamine	0	0	0	0	0	0	0	0	0	0	0	0	0	0	0	0	0	0	1	1	0	0	0	0	0	1	0	0	1	1	0	0	1	0	1	0	1	1	0	0	1	0	0	0	0	0	0	0	1
copper sulfate	0	0	0	0	1	1	0	0	1	1	0	0	0	0	1	0	0	0	0	1	1	0	0	0	0	0	1	0	1	0	0	0	1	1	1	1	0	0	1	0	0	0	0	0	0	0	0	0	0
coralyne	1	0	0	1	0	1	0	1	1	0	0	0	0	0	0	0	0	0	0	0	0	0	0	0	0	1	1	1	0	1	0	0	0	0	0	0	0	1	0	1	0	0	0	0	1	0	0	1	0
corbadrine	0	1	0	0	0	0	0	0	0	0	0	1	0	0	0	1	0	1	0	0	0	0	1	0	0	1	0	0	0	0	0	1	0	0	1	0	0	0	0	0	0	0	0	0	1	0	1	0	1
corticosterone	0	0	0	1	0	1	1	0	1	0	0	0	0	0	1	1	0	0	1	1	0	0	0	0	0	0	1	0	0	0	0	1	0	1	0	1	0	0	0	0	1	0	0	0	0	0	1	0	0
cortisone	0	0	0	0	0	0	0	0	1	0	0	0	0	1	0	0	0	0	0	1	0	0	0	1	0	0	0	1	0	0	0	1	0	1	1	0	0	0	0	0	0	0	1	0	0	0	0	0	0
corynanthine	0	1	0	1	0	1	1	1	1	0	0	0	0	0	1	0	0	0	0	0	1	0	0	0	0	0	1	0	0	1	0	0	0	1	0	1	0	0	0	0	1	0	0	0	0	0	0	0	1
cotinine	1	0	0	0	0	0	0	0	0	0	0	0	0	0	0	0	0	1	0	1	0	0	0	1	0	1	0	0	0	0	0	1	0	0	1	0	0	0	0	0	1	0	0	0	0	0	0	1	0
CP-319743	0	0	0	0	0	0	0	0	1	1	1	1	0	1	1	0	1	0	0	0	0	0	1	0	1	1	0	0	0	0	0	1	0	0	1	0	1	0	1	1	0	0	1	0	1	0	1	0	0
CP-320650-01	0	0	0	0	0	1	0	1	0	0	0	1	0	0	0	0	0	1	0	1	0	1	1	0	1	0	0	0	1	1	0	0	1	0	0	0	1	1	1	1	0	0	0	0	0	0	1	1	1
CP-645525-01	0	0	0	1	0	0	0	0	1	0	0	1	1	1	1	0	1	1	0	0	0	0	1	0	1	1	1	1	1	1	1	0	1	0	1	0	1	0	1	1	0	0	1	1	1	1	0	0	0
CP-690334-01	0	0	0	1	0	1	1	0	0	0	1	1	0	0	0	0	0	0	1	1	1	1	0	0	1	0	1	1	0	0	0	0	1	0	0	0	1	1	0	0	1	0	0	0	0	1	0	1	0
CP-863187	1	0	0	0	0	0	0	0	0	0	0	0	0	1	1	0	0	1	0	1	0	0	1	1	1	1	0	1	1	0	0	0	0	0	1	0	1	1	1	0	0	0	1	0	1	0	0	1	0
CP-944629	1	0	0	0	0	0	0	0	0	0	0	1	0	1	1	0	0	0	0	0	0	0	1	1	1	1	0	0	1	0	0	1	0	0	1	0	1	1	1	0	0	0	1	0	1	0	0	1	0
cromoglicic acid	1	0	1	0	0	0	1	1	0	0	0	0	0	0	0	0	0	0	0	0	0	0	1	0	0	1	0	0	1	0	0	0	0	0	0	0	0	0	1	0	0	0	0	1	0	0	0	0	0
crotamiton	1	1	0	0	0	0	0	0	0	0	0	0	0	0	1	0	0	0	0	0	1	0	0	1	0	0	1	1	0	0	0	0	0	1	0	0	0	0	0	1	0	1	0	0	0	0	0	0	0
cyanocobalamin	0	0	0	0	0	0	0	0	1	0	0	0	0	0	1	1	0	0	0	0	0	0	0	1	0	0	0	0	0	0	0	0	0	1	0	0	0	1	0	0	0	1	0	0	0	0	0	0	0
cyclic adenosine monophosphate	0	0	0	0	1	1	1	1	0	0	0	0	0	0	1	0	0	0	0	0	0	0	0	0	0	1	0	0	0	0	0	0	1	0	0	0	0	1	0	0	0	0	0	0	1	0	0	0	0
cyclizine	0	0	0	0	0	0	1	0	0	0	1	0	0	1	0	0	0	0	0	0	0	0	0	1	0	1	1	0	0	0	0	0	1	0	0	0	0	1	0	0	1	0	0	0	0	1	0	0	0
cyclobenzaprine	0	0	0	1	0	1	0	0	0	1	1	0	1	0	0	0	0	1	0	1	0	0	0	0	0	1	0	0	0	0	0	0	0	0	0	0	0	0	1	0	0	1	0	1	0	0	1	0	1
cyclopenthiazide	1	0	0	0	0	0	1	1	1	0	0	0	0	0	1	0	0	0	0	1	1	0	1	0	0	0	1	0	0	0	0	0	0	0	0	0	0	0	0	0	0	0	0	0	0	0	0	1	0
cyclopentolate	0	0	0	0	0	0	0	0	0	0	0	0	0	0	0	0	0	1	1	0	0	0	0	0	0	0	0	1	0	0	0	1	0	1	0	0	0	0	0	0	0	0	0	0	1	0	0	0	0
cycloserine	0	0	0	0	0	0	0	0	1	0	0	0	0	1	0	0	0	0	0	0	0	0	0	1	0	0	0	0	1	0	0	0	0	0	1	0	0	1	0	1	1	0	1	0	0	1	0	0	1
cyproheptadine	1	0	0	1	0	0	0	0	1	1	1	1	1	0	0	0	0	0	0	0	1	0	1	0	0	0	0	0	1	0	0	0	0	0	0	0	0	0	1	1	0	0	0	1	0	1	1	0	0
cyproterone	1	0	0	1	0	0	0	0	1	1	1	0	0	0	1	1	0	0	0	0	0	0	0	1	0	0	1	1	0	0	0	0	0	1	0	0	0	0	0	1	1	0	0	0	0	1	0	0	0
cytisine	0	0	0	0	0	1	0	1	1	0	0	0	0	0	0	1	0	0	0	1	0	0	0	0	0	0	1	0	0	0	0	0	0	0	0	1	0	1	0	0	1	0	0	0	0	0	0	0	0
cytochalasin B	0	0	0	0	0	0	1	0	0	1	0	1	1	0	0	0	0	0	0	0	1	0	0	0	0	0	0	1	0	0	1	0	1	0	0	1	0	1	0	0	0	0	1	0	0	1	1	0	0
dacarbazine	1	0	0	0	0	0	0	0	0	0	0	0	1	0	0	1	0	0	0	0	0	0	0	1	0	0	0	1	0	0	0	0	0	0	0	0	0	0	0	0	0	0	0	0	1	0	0	0	0
danazol	1	0	1	0	0	0	0	0	0	1	1	0	0	1	1	0	1	1	0	1	0	0	1	0	0	1	0	0	0	1	1	0	1	0	1	0	1	0	1	1	0	1	1	1	1	0	1	0	0
dantrolene	0	0	0	0	0	0	0	0	0	0	1	0	0	0	0	0	0	0	0	1	1	0	0	0	0	0	0	1	1	0	0	0	0	0	0	0	0	1	1	0	0	0	0	0	0	0	0	0	0
dapsone	0	0	0	0	0	1	0	0	1	0	0	0	0	0	0	0	0	0	0	1	0	0	0	0	0	0	1	0	1	0	0	0	0	0	0	0	0	0	0	0	0	0	0	0	0	0	0	0	0
daunorubicin	0	0	1	0	0	0	0	0	0	0	0	1	0	1	1	0	1	1	0	0	0	0	0	1	1	1	0	0	1	0	1	0	0	0	0	0	1	1	0	1	0	0	0	1	0	1	0	1	0
debrisoquine	0	0	0	0	0	0	0	0	1	0	0	0	0	0	1	1	0	0	0	1	0	0	1	0	0	0	1	0	0	0	0	0	1	0	0	0	0	1	0	0	0	0	0	0	0	0	0	0	0
decamethonium bromide	0	0	0	0	1	0	1	1	0	0	0	0	0	1	0	0	0	0	1	1	0	0	0	0	0	0	0	1	0	0	0	1	1	0	0	0	0	1	1	0	0	0	1	1	1	0	0	0	0
decitabine	0	0	0	0	0	1	0	0	0	0	0	0	0	0	0	1	0	0	1	1	0	0	0	0	0	0	1	0	0	0	0	0	1	0	0	0	0	1	0	0	0	0	0	0	0	0	0	0	0
deferoxamine	0	0	1	0	0	0	0	0	0	0	0	1	1	1	0	1	1	1	1	0	0	0	1	1	1	1	0	1	0	0	0	1	1	1	1	0	1	0	1	0	0	0	1	1	1	1	0	0	0
dehydrocholic acid	1	0	0	0	0	0	0	1	0	0	0	0	0	0	0	0	0	0	0	1	0	0	0	1	0	0	0	0	0	0	0	0	0	0	0	0	0	0	0	0	0	0	0	0	1	0	0	0	0
delsoline	0	0	0	0	0	0	0	0	1	0	0	0	0	0	0	0	0	1	0	1	0	0	0	0	0	0	0	0	0	0	0	1	1	0	0	0	0	0	0	0	0	0	0	0	0	0	0	0	0
demecarium bromide	0	1	0	0	0	0	0	0	0	0	0	0	0	0	0	0	0	0	0	1	0	0	0	0	0	1	0	0	1	0	0	0	1	0	0	0	0	0	1	0	0	0	0	1	0	0	0	1	0
demeclocycline	0	1	0	0	0	0	0	0	1	0	0	0	0	0	1	1	0	0	0	0	0	0	0	1	0	0	1	1	0	0	0	0	0	1	0	0	0	0	0	0	1	0	0	0	0	0	0	0	0
demecolcine	1	0	0	1	1	1	1	1	1	1	0	0	1	0	0	1	0	0	0	0	1	0	0	0	0	0	0	0	0	0	0	0	0	1	0	1	0	0	0	0	0	0	0	0	0	0	0	1	1
denatonium benzoate	0	0	0	0	0	0	0	0	0	0	0	0	0	0	0	0	0	0	0	0	0	0	0	1	0	0	0	1	0	1	0	0	0	0	0	0	0	1	0	0	1	0	0	0	0	1	0	0	0
deptropine	1	0	1	1	0	0	0	0	0	1	1	1	1	1	0	0	1	1	0	0	0	0	0	1	1	0	1	0	1	0	1	1	0	0	0	0	0	1	1	0	0	0	1	1	0	1	0	0	0
depudecin	0	0	0	0	0	0	1	0	0	0	0	0	0	1	0	0	0	0	0	0	1	0	0	0	0	0	1	0	1	0	0	0	0	0	0	0	1	0	1	0	1	0	0	0	0	0	0	0	0
dequalinium chloride	1	0	0	0	0	0	0	1	0	1	0	1	1	0	0	1	1	0	0	0	0	0	1	1	1	1	0	0	0	1	1	0	0	0	0	0	0	0	0	1	0	0	1	0	0	1	0	0	0
desipramine	0	0	0	1	0	1	1	1	1	1	1	1	1	0	0	0	0	1	1	0	1	0	0	0	0	0	0	0	0	1	0	0	1	1	0	0	0	0	0	0	0	0	0	1	0	1	1	0	0
desoxycortone	1	0	0	0	0	0	0	1	0	0	0	0	1	0	1	0	0	1	1	0	0	0	0	1	0	1	0	0	0	0	0	1	0	0	1	0	1	1	0	0	0	0	1	0	1	0	1	0	1
dexamethasone	0	0	1	1	0	0	0	0	1	0	0	0	0	1	0	0	0	0	0	0	1	0	0	0	0	0	0	0	1	0	0	1	0	1	0	0	1	1	0	1	0	0	1	0	0	0	0	0	1
dexibuprofen	0	1	0	0	0	1	0	1	0	0	0	0	0	0	1	1	0	0	1	0	0	0	0	1	0	1	0	0	0	0	0	0	0	0	0	0	0	1	1	0	0	0	0	0	1	0	0	0	0
dexpanthenol	0	0	0	0	0	0	0	0	1	0	0	0	0	0	0	0	0	1	1	0	0	0	0	0	0	1	0	1	0	0	0	0	0	0	0	0	0	0	1	0	0	0	0	0	0	0	0	0	0
dexpropranolol	1	1	0	0	0	0	0	0	1	0	0	1	1	0	1	1	0	0	0	0	0	0	0	0	0	0	0	1	0	0	0	0	0	0	0	0	0	0	1	0	0	0	0	0	0	0	0	1	0
dextromethorphan	1	0	0	0	0	0	0	0	0	0	1	1	0	0	0	0	0	0	0	0	0	0	0	1	1	0	0	1	1	0	0	0	0	0	0	0	0	0	0	1	0	0	1	0	0	1	0	0	0
dexverapamil	1	1	1	0	0	0	0	0	0	0	0	1	1	1	1	1	1	1	1	0	0	0	1	1	1	1	1	1	1	1	1	1	1	0	1	0	1	0	1	1	1	0	1	1	0	1	0	0	0
diazoxide	0	0	0	0	0	1	1	1	0	0	0	0	0	0	0	0	0	0	1	0	1	0	0	0	0	0	1	0	0	1	0	0	0	1	0	0	0	0	0	0	0	0	0	0	0	0	0	0	0
diclofenac	0	0	1	0	0	0	0	0	0	0	0	0	0	1	1	1	1	0	1	1	0	0	1	1	0	1	0	0	1	1	0	1	0	0	1	0	1	0	1	1	0	0	1	0	1	0	0	0	0
diclofenamide	0	0	0	0	0	1	1	1	1	0	0	0	0	0	1	0	0	0	0	1	1	0	0	0	0	0	0	0	0	0	0	0	1	1	0	0	0	0	0	0	0	0	0	0	0	0	0	0	0
dicloxacillin	0	0	0	0	0	0	0	1	0	0	0	0	0	0	0	1	1	0	0	1	0	0	1	0	0	0	1	0	1	1	0	0	1	0	0	0	1	0	1	1	0	0	1	1	1	0	0	0	0
dicoumarol	0	0	0	0	0	0	1	0	1	0	0	0	0	0	1	0	0	0	0	0	0	0	1	0	0	0	0	1	1	1	0	0	1	0	0	0	1	0	0	0	0	0	0	0	0	0	0	0	0
dicycloverine	0	0	0	0	0	1	0	1	0	1	1	0	1	0	0	0	0	0	0	0	0	1	1	0	0	1	0	0	0	1	0	0	1	0	0	0	0	0	1	0	0	1	1	1	1	0	1	0	0
dienestrol	0	1	0	0	1	1	0	0	0	1	1	0	1	0	1	1	0	0	0	0	0	1	0	1	0	0	0	1	0	0	0	1	0	1	0	0	0	0	0	0	1	1	0	0	0	0	1	0	0
diethylcarbamazine	1	0	0	0	0	0	0	0	0	0	0	0	0	0	0	1	0	0	0	1	0	0	0	0	0	0	1	1	0	0	0	0	0	0	0	0	0	0	0	0	0	0	0	0	0	0	0	0	1
diethylstilbestrol	0	0	0	1	1	1	1	1	0	1	1	0	1	0	0	1	0	0	1	1	1	1	0	0	0	0	0	0	0	1	1	0	0	1	0	1	1	0	0	0	0	1	0	0	0	0	1	1	1
difenidol	1	0	0	0	0	1	1	1	0	0	0	0	0	0	0	0	0	1	0	0	0	0	0	0	0	0	1	1	0	0	0	0	0	1	0	0	0	1	0	0	1	0	0	0	0	0	0	0	0
diflorasone	0	0	0	0	0	1	1	1	0	0	0	0	1	0	0	0	0	0	1	0	0	0	1	0	0	1	1	0	1	1	0	0	1	0	1	0	1	0	0	0	1	0	1	0	1	0	0	0	0
diflunisal	0	1	0	0	0	1	1	1	0	0	0	0	0	0	0	0	0	1	1	0	0	0	0	0	0	0	0	0	0	0	0	0	0	0	0	0	0	0	1	0	0	1	0	0	0	0	0	0	0
digitoxigenin	0	0	0	0	0	0	0	0	0	0	0	1	0	0	0	0	1	0	0	0	0	1	0	0	1	0	0	0	0	0	1	0	1	1	0	0	0	1	0	1	0	0	0	1	1	1	1	1	0
digoxigenin	0	0	0	0	0	1	0	0	0	0	0	1	0	0	0	0	1	0	0	0	0	1	0	0	1	0	0	0	1	0	1	0	1	1	0	0	0	1	1	1	0	0	0	1	0	1	1	0	0
digoxin	0	0	0	0	0	0	0	0	1	0	0	1	0	0	0	0	1	0	0	1	0	1	1	0	1	0	1	0	0	0	1	1	0	1	0	0	0	0	0	1	0	0	0	1	1	1	1	0	0
dihydroergocristine	0	1	0	1	0	0	0	0	0	0	1	1	0	0	0	0	1	0	1	1	0	0	1	0	0	0	1	0	1	1	0	1	1	0	0	0	1	0	1	1	0	0	0	1	0	0	1	1	0
dihydroergotamine	1	0	0	1	0	0	0	0	1	0	0	1	1	1	0	0	0	0	1	0	0	0	0	1	1	1	0	1	1	0	1	1	0	0	1	0	0	1	1	0	0	0	0	0	0	1	1	1	0
dihydrostreptomycin	0	0	0	0	0	0	0	1	0	0	0	0	0	0	0	0	0	0	1	0	0	0	1	0	0	1	0	1	1	0	0	0	0	0	0	0	0	1	1	0	1	0	0	1	0	0	0	0	1
dilazep	0	0	0	1	0	0	0	0	1	0	0	1	0	0	0	0	0	0	0	0	1	1	0	1	1	0	1	0	0	0	0	0	0	1	0	0	1	1	0	0	1	0	0	0	0	1	0	1	0
diloxanide	0	0	0	0	1	0	1	0	1	0	1	0	0	1	0	0	0	1	0	1	1	1	0	0	0	0	1	0	0	0	0	1	1	1	0	1	0	0	0	0	0	0	0	0	0	1	0	0	0
diltiazem	1	1	0	0	0	0	0	0	0	0	0	0	0	0	0	0	0	1	0	0	0	0	0	1	0	1	0	0	0	0	0	0	0	0	0	0	0	0	1	1	0	0	0	1	1	1	1	0	0
dimenhydrinate	0	0	0	0	0	1	0	0	0	0	0	0	0	0	0	0	0	0	1	1	0	0	0	0	0	0	0	0	0	0	0	0	0	0	0	0	0	1	0	0	0	0	0	0	0	0	0	0	1
dimethadione	1	1	0	0	0	0	0	0	0	0	0	0	0	0	0	0	0	0	0	0	1	0	0	1	0	0	0	1	0	0	0	1	0	0	0	0	0	0	0	0	0	1	0	0	0	0	0	0	0
dimethyloxalylglycine	0	0	0	0	0	1	1	1	0	0	0	1	1	1	0	0	1	1	0	0	1	1	0	0	1	1	1	0	1	0	1	0	1	0	0	0	0	0	0	0	0	0	0	1	0	0	0	1	0
dinoprost	0	1	0	0	0	1	0	1	0	0	1	0	0	0	0	0	0	0	1	0	0	0	0	0	0	1	1	0	0	1	0	0	1	0	1	0	0	0	0	1	1	0	0	1	1	0	1	0	1
dinoprostone	1	0	0	0	0	0	0	0	0	0	1	0	0	1	0	0	0	0	0	1	0	0	1	0	0	0	0	0	1	0	0	0	0	0	0	0	1	0	1	0	0	0	0	1	1	0	1	0	0
dioxybenzone	0	0	0	0	0	0	0	1	0	0	0	0	0	0	1	1	0	0	0	0	0	0	1	0	0	0	1	0	1	0	0	0	0	0	1	0	1	0	0	1	0	1	1	0	1	0	0	0	1
diperodon	0	0	0	1	0	1	1	1	0	0	0	1	0	0	0	0	0	0	1	0	0	0	0	0	0	0	0	0	0	1	0	0	1	1	0	0	0	0	0	0	0	0	0	0	0	0	1	0	0
diphemanil metilsulfate	0	0	0	0	1	1	1	1	1	0	1	0	0	0	0	0	0	0	0	0	0	0	1	0	0	1	0	1	0	1	0	0	1	0	0	0	0	0	1	0	0	0	0	0	0	0	0	0	1
diphenhydramine	0	0	0	0	0	1	0	0	1	0	1	1	0	0	0	0	0	0	0	1	0	1	0	0	0	0	0	0	0	0	0	0	0	0	0	0	0	1	0	0	0	1	0	0	0	0	0	0	1
diphenylpyraline	0	0	0	1	0	0	1	0	0	1	1	1	0	0	0	0	0	1	0	0	1	0	0	0	0	0	1	1	0	0	0	0	0	0	0	1	0	0	0	0	1	1	0	1	0	1	0	0	0
dipivefrine	1	1	0	1	0	0	0	0	1	0	1	1	0	0	1	1	0	0	0	0	0	0	1	1	1	1	1	1	1	0	0	0	0	0	0	0	0	0	0	1	1	1	0	0	0	0	1	1	1
diprophylline	0	0	0	0	0	0	1	0	0	0	0	0	0	0	0	0	0	0	0	1	1	0	0	0	0	0	0	0	0	0	0	0	1	1	0	0	0	0	0	0	0	0	1	1	0	0	0	0	0
dipyridamole	0	0	1	0	0	0	0	0	0	1	0	1	0	1	1	0	0	0	0	1	0	0	1	1	1	0	1	1	1	0	1	1	0	0	1	0	1	1	0	1	0	0	0	0	1	0	1	1	0
dirithromycin	1	1	0	0	0	0	0	0	0	0	0	1	0	1	0	1	1	1	1	1	0	0	1	0	0	0	1	1	1	1	1	1	1	0	1	0	1	0	0	1	0	0	1	1	1	0	0	0	0
disopyramide	1	0	0	0	0	0	0	1	0	0	0	0	0	0	0	0	0	0	0	0	0	0	0	0	0	0	1	0	1	0	0	0	0	0	0	0	0	1	0	0	0	0	0	0	0	0	0	0	0
disulfiram	0	1	0	0	1	1	0	0	0	1	1	1	1	0	0	1	0	0	0	0	0	0	1	0	0	0	0	0	0	1	1	0	0	0	0	1	0	0	1	0	0	0	0	0	0	1	0	1	1
dizocilpine	1	0	0	0	0	0	0	0	1	0	0	0	1	0	0	1	0	0	0	0	0	0	1	0	0	0	0	0	0	0	0	1	0	0	0	0	0	0	0	1	0	0	0	0	1	0	0	0	0
dl-alpha tocopherol	1	0	0	0	0	0	0	0	0	0	0	0	0	0	0	1	0	0	0	0	0	0	1	0	0	0	0	1	1	0	0	0	0	0	0	0	0	0	1	1	0	1	0	1	1	0	0	1	0
DL-PPMP	0	0	0	1	0	1	1	1	1	0	0	0	0	0	0	0	0	0	0	0	0	1	0	0	0	0	0	0	0	0	0	1	1	0	0	1	0	1	0	0	0	0	0	0	1	0	1	0	0
DL-thiorphan	0	1	0	0	0	0	0	1	1	0	0	0	0	0	0	0	0	0	1	0	0	0	0	0	0	0	0	1	0	0	0	0	0	0	0	0	0	0	0	1	0	0	0	1	0	0	0	0	0
dobutamine	1	1	0	0	0	0	0	0	0	0	1	1	0	0	1	1	0	0	0	0	1	0	1	0	0	0	1	0	1	0	0	0	0	0	0	0	0	0	0	1	0	1	0	0	0	0	1	0	0
docosahexaenoic acid ethyl ester	0	0	1	0	1	1	1	0	1	1	0	0	0	0	0	0	0	1	1	0	0	0	0	0	0	0	1	0	0	0	0	0	1	0	0	1	0	0	0	0	1	0	0	0	0	0	0	1	0
domperidone	0	0	0	1	0	1	0	1	1	1	1	0	1	0	1	1	0	0	0	0	0	0	0	0	0	0	1	0	0	0	0	0	0	0	0	0	0	0	0	1	1	1	0	0	0	0	0	0	0
dopamine	0	0	0	0	0	0	1	1	1	0	0	0	0	0	1	1	0	1	1	0	1	0	0	1	0	0	0	1	0	0	0	1	1	0	1	0	1	0	1	0	1	0	1	0	1	0	1	0	0
dorzolamide	0	0	0	0	0	0	0	0	1	0	0	0	0	0	0	0	0	0	0	1	0	0	0	0	0	0	1	1	0	0	0	1	1	1	0	0	0	0	0	0	0	0	0	0	1	0	0	0	1
dosulepin	0	0	0	1	0	1	1	1	1	1	1	1	0	0	1	0	0	0	0	0	1	0	0	0	0	0	0	0	0	0	0	0	0	1	0	1	0	1	0	0	0	0	0	1	0	0	1	0	0
doxazosin	1	1	0	0	0	0	0	0	0	0	1	0	1	1	0	0	0	1	1	0	0	0	0	1	0	1	1	1	0	0	0	1	0	0	1	0	0	0	0	0	1	0	0	0	0	0	0	0	0
doxepin	0	0	0	0	0	0	0	0	0	0	1	1	1	0	0	1	0	1	1	0	0	0	0	0	0	1	0	1	0	1	0	0	0	0	0	0	0	0	1	0	0	0	0	1	0	0	0	0	1
doxorubicin	0	0	1	0	0	0	1	0	1	0	0	1	0	1	0	0	1	0	0	0	1	0	0	0	1	0	0	0	0	0	0	0	0	1	0	0	1	1	0	0	0	0	1	0	0	0	0	0	0
doxycycline	0	0	0	0	0	1	1	1	0	0	0	0	0	0	1	0	0	0	0	0	1	0	0	0	0	0	0	0	0	0	0	0	0	1	0	0	0	0	0	0	0	1	0	0	0	0	0	1	0
doxylamine	1	1	0	0	0	1	0	1	0	0	0	0	1	0	0	1	0	1	1	0	0	0	0	0	0	1	0	0	0	1	0	1	0	0	0	0	0	0	1	0	0	0	0	0	1	0	0	0	1
drofenine	1	1	0	0	0	0	0	0	0	0	0	0	1	0	0	1	0	0	0	0	0	0	1	1	0	1	0	1	0	0	0	1	0	1	0	0	0	0	0	0	1	1	1	1	0	1	0	0	1
droperidol	0	0	0	1	0	0	1	0	1	0	0	0	0	1	0	0	0	1	1	0	0	0	0	0	0	0	0	0	0	1	1	1	1	0	1	0	0	0	0	0	0	0	0	1	0	1	0	0	0
dropropizine	0	0	0	0	0	0	0	0	0	0	0	0	0	0	0	0	0	0	0	0	0	0	0	0	0	0	0	0	0	1	0	1	0	1	0	0	0	0	0	0	0	0	0	0	0	0	0	0	0
dyclonine	0	0	0	1	1	1	1	1	1	1	0	0	0	0	0	0	0	0	0	0	0	0	0	0	0	1	1	0	0	0	0	0	1	0	0	1	0	0	0	0	0	0	0	0	0	0	0	0	0
dydrogesterone	0	0	0	0	0	1	1	1	0	0	1	0	0	0	0	0	0	1	0	1	0	0	0	0	0	0	0	0	0	0	0	1	0	0	0	1	1	1	0	0	1	0	0	0	0	1	1	0	1
ebselen	1	1	0	1	1	0	0	0	0	1	0	0	1	1	0	0	0	1	0	0	0	0	1	1	1	1	0	0	0	0	1	1	0	0	1	1	0	0	0	0	0	0	0	1	0	1	1	0	0
econazole	0	0	1	1	0	0	0	0	0	1	1	0	1	0	1	0	0	0	0	1	0	1	1	1	0	0	0	0	0	0	1	0	0	0	0	0	0	0	0	0	0	0	1	0	0	1	1	0	0
edrophonium chloride	0	0	0	0	0	0	0	0	0	0	0	0	0	0	0	0	0	1	0	1	1	0	0	0	0	1	0	0	0	0	0	1	0	1	0	0	0	0	0	0	0	0	0	0	1	0	0	1	0
eldeline	0	0	0	0	0	0	1	1	1	0	0	0	0	0	1	0	0	0	0	0	1	0	0	1	0	0	0	1	0	0	0	0	0	1	0	0	0	1	0	0	0	0	0	0	1	0	0	0	0
ellipticine	0	0	1	0	0	1	1	1	1	0	0	1	0	1	0	0	1	0	0	0	0	1	0	0	0	0	0	0	0	0	1	0	0	1	0	0	1	1	0	0	0	0	0	1	0	0	1	1	0
emetine	1	1	0	0	0	0	0	0	1	0	0	0	1	0	1	0	0	1	1	0	0	1	1	1	0	1	1	1	1	1	1	1	0	0	1	0	0	0	1	1	1	0	0	0	1	1	0	1	0
enalapril	0	0	0	0	0	1	1	1	0	0	0	0	0	0	0	0	0	0	0	0	0	1	0	0	0	0	0	0	0	0	0	0	1	0	0	0	0	1	0	0	1	0	0	0	0	0	0	0	0
enilconazole	0	0	0	1	0	0	0	0	0	1	0	0	0	1	0	1	0	0	0	1	0	0	0	0	0	0	0	0	1	0	0	0	0	0	0	0	1	0	0	1	1	0	1	0	0	0	1	0	0
enoxacin	0	1	0	0	0	0	1	1	0	0	0	0	0	0	0	1	0	0	1	0	0	0	0	0	0	0	0	0	0	0	0	0	0	0	0	0	0	0	0	0	0	1	0	0	0	0	0	0	0
epiandrosterone	0	0	0	1	0	0	0	0	0	1	0	0	0	0	0	0	0	1	0	0	0	0	1	0	0	0	0	0	1	0	0	0	1	1	0	0	1	0	0	1	0	1	0	0	0	1	1	1	1
epirizole	0	0	0	0	0	0	0	0	0	0	0	0	0	0	0	0	0	1	1	0	0	0	0	0	0	1	0	0	0	0	0	0	1	0	0	0	0	0	1	0	0	0	0	0	1	0	0	0	1
epitiostanol	0	1	0	1	0	1	0	0	1	1	1	0	0	0	0	0	0	0	1	0	1	0	0	0	0	0	1	0	0	1	0	0	0	0	0	0	0	1	0	0	1	1	0	0	0	0	0	0	1
epivincamine	1	0	1	0	0	0	0	0	0	0	0	0	1	1	1	0	0	0	1	0	0	0	0	1	0	1	0	0	1	0	1	1	0	0	1	0	0	1	0	1	1	0	1	1	1	0	0	0	0
equilin	0	0	1	1	1	1	1	1	0	1	1	0	0	0	1	0	0	0	0	0	0	0	1	0	0	1	1	0	0	0	0	0	1	0	0	1	1	0	0	1	1	1	0	0	0	0	0	1	0
erastin	1	0	1	1	0	0	0	0	0	1	1	1	0	1	1	0	0	1	0	0	0	0	1	1	0	0	0	1	1	0	1	0	0	0	0	0	1	0	1	1	0	0	1	0	0	1	1	0	0
ergocalciferol	0	0	0	0	0	0	0	0	0	0	0	0	0	0	0	0	0	0	1	0	0	0	0	1	0	1	0	0	1	1	0	0	0	1	1	0	1	0	1	0	1	0	0	0	0	0	0	0	1
erythromycin	0	0	0	0	0	0	0	0	1	0	0	0	0	0	0	1	0	0	0	1	0	0	1	0	0	1	0	0	0	0	0	1	0	1	0	0	0	0	0	0	0	1	0	0	0	0	0	0	0
esculetin	0	1	1	0	0	1	0	0	0	1	1	0	0	0	1	1	0	0	0	1	0	0	1	0	0	0	1	0	0	1	0	0	0	0	0	0	0	0	0	0	1	0	0	0	0	0	0	0	1
esculin	0	0	0	0	0	0	1	0	0	0	0	0	0	1	0	0	0	0	1	0	0	0	0	1	0	0	0	0	0	0	0	1	1	0	1	0	0	1	0	0	0	0	0	0	0	1	0	0	1
estradiol	0	0	0	1	1	1	1	1	1	0	1	0	0	0	0	1	0	0	1	0	1	0	0	0	0	0	0	0	0	0	0	0	0	1	0	0	0	0	0	0	1	1	0	0	0	0	0	0	1
estriol	0	1	1	0	0	0	0	0	0	0	1	0	1	1	0	1	0	0	1	0	0	0	0	0	0	0	0	0	0	1	0	0	0	1	1	0	1	0	0	1	1	1	1	0	0	0	0	0	0
estrone	0	1	0	0	0	0	0	0	0	1	1	0	1	0	0	1	0	0	0	0	0	0	0	0	0	0	0	1	0	1	0	1	0	0	0	0	0	0	0	0	1	1	0	0	1	0	1	0	0
estropipate	0	0	0	0	0	1	1	1	0	0	0	0	0	0	1	0	0	0	0	0	0	0	0	1	0	1	1	1	0	1	0	0	0	1	0	0	0	1	0	0	1	1	0	0	0	0	0	0	0
etacrynic acid	0	1	1	0	1	0	0	0	0	0	0	1	1	0	0	1	1	0	1	1	0	0	1	0	1	1	0	0	1	0	1	0	0	0	0	1	0	0	1	0	0	0	1	0	0	1	0	1	0
etamivan	0	0	0	0	0	0	0	0	1	0	0	0	0	0	1	0	0	1	0	1	0	0	0	0	0	1	0	0	0	1	0	0	0	0	0	0	0	0	0	0	0	0	0	1	1	0	0	0	0
etamsylate	0	0	0	0	0	0	0	0	1	0	0	0	0	1	1	0	0	0	0	0	0	0	0	1	0	0	0	1	0	0	0	1	0	1	0	0	0	0	0	0	0	0	1	0	0	0	0	0	0
etanidazole	0	0	0	0	0	0	0	0	0	0	0	0	0	0	0	0	0	1	1	0	0	0	1	0	0	1	0	0	0	0	0	1	0	0	0	0	0	0	1	0	0	0	0	0	1	0	0	0	1
ethambutol	0	0	0	0	0	0	0	0	0	0	0	0	0	0	0	1	0	0	0	0	0	0	0	1	1	0	0	0	0	0	0	0	0	0	1	0	0	1	1	1	0	0	0	0	1	0	0	0	1
ethaverine	0	0	0	0	0	0	0	0	0	0	0	1	0	1	0	1	0	1	0	0	0	0	1	0	0	1	0	0	1	0	0	0	0	1	0	0	1	0	0	1	0	0	1	0	0	0	1	0	0
ethionamide	0	0	0	0	0	0	0	0	0	0	0	0	0	0	0	0	0	0	0	1	0	0	0	0	0	0	0	0	0	1	0	0	1	0	0	0	0	0	0	0	0	0	0	0	0	0	0	0	0
ethisterone	1	0	1	1	0	0	0	0	0	0	0	0	1	1	0	0	0	1	1	1	0	0	0	1	0	0	1	0	1	0	1	1	1	0	1	0	0	1	0	0	1	1	0	0	1	0	0	0	0
ethosuximide	1	1	1	0	0	0	0	0	0	0	0	1	1	1	0	0	1	1	1	0	0	0	1	1	1	1	1	0	1	1	1	1	0	0	1	0	1	0	1	1	0	0	1	1	1	0	0	0	0
ethotoin	1	0	0	0	0	0	1	1	0	0	0	0	0	1	0	0	0	0	0	0	0	1	0	0	1	0	0	0	1	0	0	1	0	0	1	0	0	0	1	1	1	0	0	0	1	1	0	1	0
ethoxyquin	0	0	1	0	0	0	0	0	0	1	0	1	0	0	0	1	0	0	0	0	0	0	1	0	0	0	1	1	0	1	0	0	1	0	0	1	0	0	0	0	0	0	0	0	0	1	0	0	0
eticlopride	0	0	0	0	0	0	0	0	1	0	0	1	0	0	0	1	0	1	0	1	1	1	0	0	0	0	1	1	0	1	0	0	1	1	0	0	0	0	0	0	0	0	0	0	0	1	0	0	0
etidronic acid	0	1	0	0	0	1	0	0	1	0	0	0	0	0	1	1	0	0	1	0	1	0	0	1	0	0	0	1	0	0	0	0	0	1	0	0	0	1	0	0	0	0	0	0	0	0	0	0	0
etifenin	1	0	0	0	0	1	1	1	1	0	0	0	0	0	1	1	0	0	0	1	1	0	0	0	0	0	0	1	0	0	0	0	0	1	0	0	0	1	0	0	0	1	0	0	0	0	0	0	0
etilefrine	0	0	0	0	0	1	0	1	0	0	0	0	0	0	0	1	0	0	0	1	0	0	1	0	0	0	1	0	1	1	0	0	0	0	0	0	0	0	0	0	0	0	0	0	0	0	1	0	1
etiocholanolone	1	0	0	1	0	1	0	0	1	0	1	0	0	0	0	0	0	1	0	1	0	0	0	0	0	0	1	1	1	0	0	0	0	0	0	0	0	1	0	1	1	1	0	0	0	0	1	0	0
etodolac	1	0	0	0	0	1	1	1	1	0	0	0	0	0	0	0	0	0	0	0	0	0	0	0	0	0	0	0	0	0	0	0	1	0	0	0	0	0	0	0	0	0	0	0	0	0	1	1	0
etofenamate	1	1	0	0	0	0	0	1	0	0	0	0	0	0	1	1	0	0	0	0	0	0	0	0	0	1	0	0	0	0	0	0	0	0	0	0	1	0	1	0	1	0	1	0	1	0	1	0	0
etofylline	0	1	0	0	0	0	0	0	0	0	0	0	0	0	0	0	0	1	0	0	1	0	1	1	0	1	0	0	0	1	0	1	0	0	0	0	0	0	0	0	0	0	1	0	1	0	0	0	0
etomidate	0	0	0	0	0	0	0	0	1	0	0	0	0	1	0	0	0	0	0	0	0	0	0	0	0	0	1	0	0	1	0	0	0	1	0	0	0	0	0	1	0	0	1	0	1	0	0	0	0
etoposide	0	0	1	0	0	0	1	0	0	0	0	1	0	0	0	0	1	1	0	1	0	1	1	0	1	0	1	0	1	0	1	0	1	0	0	1	0	1	1	0	0	0	0	0	0	1	1	1	0
etynodiol	0	0	0	1	0	1	0	1	0	0	0	0	0	1	0	0	0	0	1	0	0	0	0	0	0	0	1	0	0	0	1	0	1	0	1	0	1	1	0	1	1	1	1	0	1	0	0	0	1
eucatropine	1	0	0	0	0	0	0	0	0	0	0	0	0	0	0	1	0	0	0	0	0	0	0	1	0	0	0	0	0	0	0	0	0	1	0	0	0	0	0	0	0	0	0	0	1	0	0	0	0
exemestane	1	0	1	0	0	0	0	0	0	0	0	1	0	1	1	1	1	1	1	1	0	0	0	1	1	0	1	1	1	1	1	1	1	0	1	0	1	0	0	0	1	0	1	1	0	1	0	0	0
exisulind	0	1	0	0	0	0	0	0	1	1	0	0	0	0	0	1	0	0	0	0	1	0	0	0	0	1	0	0	1	0	0	0	0	0	0	0	0	0	0	0	0	1	0	0	0	0	0	0	0
F0447-0125	0	0	0	0	1	0	0	0	1	1	0	0	1	0	1	0	1	0	1	0	0	1	0	0	0	1	0	1	1	0	1	0	1	0	0	1	0	0	1	0	1	0	0	1	0	0	0	1	0
famotidine	0	0	0	0	0	0	1	0	0	0	0	0	0	1	0	0	0	1	0	1	1	0	0	0	0	1	0	0	0	0	0	1	1	1	1	0	0	0	0	0	0	0	0	0	0	1	0	0	0
famprofazone	1	0	1	1	0	0	0	0	0	1	1	1	0	0	1	1	1	1	0	0	0	0	1	1	1	0	0	1	0	0	1	1	0	0	0	1	0	0	1	0	0	0	1	1	1	1	0	0	0
fasudil	0	0	1	1	0	1	1	0	1	0	0	0	1	0	0	0	0	0	1	0	0	0	0	0	1	0	0	0	0	1	1	1	0	0	0	0	0	0	1	0	1	0	1	1	0	0	0	0	0
felbinac	0	0	0	0	1	1	0	0	1	0	0	0	0	0	1	1	0	0	0	1	1	0	0	0	0	0	1	1	0	0	0	0	0	1	0	0	0	0	0	0	0	1	0	0	0	0	0	0	0
felodipine	0	0	1	0	0	0	1	0	1	1	0	0	0	0	1	0	1	0	0	0	0	1	1	1	0	1	0	0	1	0	1	0	1	0	1	0	1	0	1	1	0	0	1	0	0	1	1	0	0
fenbendazole	1	0	0	1	1	0	0	0	1	1	1	1	1	0	0	1	1	0	0	1	0	0	1	0	1	1	0	0	1	0	0	0	0	0	0	0	0	0	1	1	0	0	0	0	0	1	1	0	0
fenbufen	0	0	0	0	0	0	0	0	1	0	0	0	0	0	0	1	0	0	0	0	0	0	0	1	0	0	1	0	0	0	0	0	0	0	0	0	0	1	0	1	1	0	0	0	0	0	1	0	0
fendiline	0	0	0	1	0	0	0	0	0	1	0	1	1	0	0	0	0	0	1	1	0	1	1	1	0	1	0	0	1	1	1	0	0	0	1	0	0	0	0	1	0	0	0	1	0	1	1	0	0
fenofibrate	0	0	0	0	0	1	0	0	1	1	0	1	0	0	1	0	0	0	0	1	0	0	0	0	0	0	0	0	0	0	0	0	0	0	0	0	0	0	0	0	0	0	0	0	0	1	0	0	0
fenoprofen	1	0	0	0	0	0	1	1	1	0	0	0	0	0	1	0	0	0	0	1	0	0	0	1	0	0	0	1	0	0	0	0	0	1	0	0	0	0	0	0	0	0	0	0	0	1	0	0	0
fenoterol	0	1	0	0	0	0	0	0	1	0	0	1	0	0	0	1	0	0	0	0	0	0	1	0	1	0	0	1	0	0	0	1	0	1	0	0	0	0	1	0	1	0	0	0	0	1	1	1	1
fenspiride	1	0	0	0	0	0	1	0	0	0	0	0	0	1	0	0	0	0	0	1	0	0	0	1	0	1	0	0	1	0	0	1	0	0	0	0	0	0	0	0	0	0	0	1	1	0	0	0	0
finasteride	0	0	0	0	0	1	1	1	0	1	1	0	0	0	0	0	0	0	0	1	1	1	0	0	0	0	0	0	0	0	0	0	0	0	0	1	0	1	0	0	1	0	0	0	1	0	1	0	0
fipexide	0	0	0	0	0	0	0	0	1	0	0	0	0	1	0	0	0	0	1	0	0	0	0	1	0	0	0	1	0	1	0	0	0	1	1	0	1	0	0	0	0	0	1	0	0	1	0	0	0
fisetin	0	0	1	0	0	0	1	0	1	0	0	1	0	1	1	0	1	0	0	1	0	0	0	0	1	0	1	0	0	0	1	0	1	1	0	0	1	1	0	0	0	0	1	0	0	0	0	0	0
flavoxate	0	0	0	0	0	0	0	0	0	0	0	1	0	0	0	0	0	0	0	0	1	0	0	0	0	0	1	1	0	0	0	0	0	0	0	0	0	1	0	0	1	0	0	0	0	0	0	0	0
flecainide	0	0	0	1	0	1	1	1	1	0	0	0	0	0	0	1	0	0	1	0	0	0	0	0	0	0	1	1	1	1	0	0	1	1	0	0	0	0	0	1	1	0	0	0	0	0	0	0	1
florfenicol	0	0	0	0	0	0	0	1	0	0	0	0	0	0	0	1	1	0	0	0	0	0	1	0	0	0	0	0	1	0	0	0	0	0	0	0	0	0	0	1	0	0	0	1	1	0	0	0	1
flucloxacillin	0	0	0	0	0	0	1	0	0	0	0	0	0	0	0	0	0	0	0	0	0	0	0	0	0	1	0	0	1	0	0	0	1	0	0	0	0	1	0	0	1	0	0	0	1	0	0	0	1
flucytosine	0	0	0	0	0	0	0	0	0	0	0	0	0	0	0	0	0	0	0	1	1	0	0	0	0	0	0	1	0	0	0	0	1	0	0	0	0	0	0	0	0	0	1	1	0	1	0	0	1
fludrocortisone	0	0	0	1	0	1	1	1	0	0	0	0	0	0	0	0	0	0	0	1	1	0	0	0	0	0	0	0	0	0	0	0	0	0	0	0	0	1	0	0	0	1	0	0	0	0	0	0	0
fludroxycortide	0	1	0	0	0	0	0	1	1	0	0	0	0	0	0	1	0	0	1	0	0	0	0	0	0	0	1	0	0	0	0	0	0	0	0	0	0	0	0	1	1	1	0	0	0	0	0	0	0
flufenamic acid	0	1	1	0	0	0	0	0	0	0	0	0	1	1	0	1	1	1	1	0	0	0	1	1	0	0	1	0	0	1	0	1	0	0	1	0	1	0	0	1	1	0	1	1	1	0	0	0	0
flumequine	0	0	0	1	0	0	0	0	0	0	0	0	0	0	1	1	0	0	0	1	0	0	0	1	0	0	1	0	0	1	0	0	0	0	0	0	0	1	0	0	0	0	0	0	0	0	0	0	0
flumetasone	0	0	0	1	0	0	0	0	0	0	0	0	0	0	1	0	0	0	0	0	0	0	1	1	0	1	0	1	0	0	0	0	0	0	0	0	1	0	1	0	0	0	1	0	0	0	0	0	1
flunarizine	0	0	0	0	0	0	0	0	0	1	0	0	0	0	0	1	0	0	0	0	0	0	0	0	0	0	0	0	0	0	0	0	0	1	0	0	0	0	0	0	0	1	0	0	0	0	0	0	1
flunisolide	0	1	0	0	0	0	0	1	1	0	0	0	0	0	1	1	0	0	1	0	1	0	0	1	0	0	1	0	0	0	0	1	0	1	0	0	0	0	0	0	1	0	0	0	1	0	0	0	0
flunixin	0	0	0	0	0	0	0	0	1	0	0	0	0	1	1	0	1	0	0	0	0	0	0	1	0	0	0	1	0	0	0	0	1	0	1	0	1	0	1	0	0	0	0	1	1	1	0	0	0
fluocinonide	0	1	1	0	0	0	0	0	1	0	0	0	0	0	0	0	0	0	0	0	0	0	0	1	0	0	0	1	0	0	0	1	0	1	0	0	0	0	1	0	0	1	1	0	0	0	0	0	1
fluorocurarine	0	0	0	0	0	0	0	0	0	0	0	0	0	0	0	0	0	0	0	0	0	0	0	0	0	0	1	0	1	0	0	0	0	0	0	0	0	0	0	1	0	0	0	0	0	0	0	0	1
fluorometholone	0	0	0	1	0	0	1	0	0	0	0	0	0	1	0	0	0	0	1	0	0	1	1	0	0	0	0	1	0	0	0	1	1	1	1	1	1	0	0	0	0	0	1	0	0	0	0	0	0
fluoxetine	1	0	0	1	0	0	0	0	0	1	1	1	1	0	0	0	0	1	0	0	0	0	0	1	1	0	0	0	0	0	1	1	0	1	0	1	0	1	1	0	0	1	1	1	0	1	1	0	0
flupentixol	0	0	0	1	0	0	1	0	1	1	1	1	1	0	1	1	0	1	0	0	1	0	0	1	1	0	0	1	0	0	0	0	0	0	0	1	0	1	0	0	0	0	0	0	0	1	1	0	1
fluphenazine	0	0	1	1	0	0	1	0	0	1	1	1	1	0	0	0	1	1	1	1	1	1	1	1	1	0	0	0	0	1	1	1	1	0	0	1	1	0	0	0	0	1	1	1	0	1	1	0	0
flurbiprofen	0	0	0	0	0	0	0	0	1	0	0	0	0	0	1	1	0	0	0	1	0	0	1	0	0	0	1	1	1	0	0	0	0	0	0	0	0	0	0	1	0	1	0	0	0	0	0	0	0
fluspirilene	0	0	1	1	0	0	1	0	0	1	1	1	1	0	0	0	1	1	0	0	1	1	1	0	0	0	0	0	0	1	1	1	0	1	0	0	0	0	0	0	0	0	1	1	0	1	1	0	0
flutamide	0	0	1	0	0	0	0	0	1	0	0	0	0	0	0	1	0	0	1	1	1	0	0	0	0	0	1	0	0	0	0	0	0	0	0	0	1	0	0	0	1	0	0	0	0	0	1	0	0
fluticasone	0	0	0	1	1	1	1	1	0	0	1	0	0	0	1	0	0	0	0	1	1	0	0	0	0	0	0	0	0	0	0	0	1	1	0	1	0	1	0	0	0	1	0	0	0	0	1	0	0
fluvastatin	1	0	0	1	0	0	0	1	0	0	0	1	0	1	1	0	0	1	0	1	1	1	1	0	0	0	0	1	0	0	0	0	1	0	0	0	0	0	0	0	0	1	0	0	0	0	1	0	0
fluvoxamine	1	0	0	1	0	1	1	1	0	0	1	1	0	0	1	0	0	0	0	0	1	0	0	0	0	0	0	0	0	0	0	0	1	0	0	0	0	0	0	0	1	0	0	1	0	1	1	0	0
folic acid	0	0	0	0	0	1	1	1	0	0	0	0	0	0	0	0	0	0	1	1	0	0	0	0	0	0	0	0	1	0	0	0	1	0	0	0	0	1	0	0	0	1	0	0	0	0	0	0	0
foliosidine	0	0	0	0	0	1	1	1	0	0	0	0	0	0	0	0	0	0	1	0	0	0	0	0	0	0	0	0	0	1	0	0	0	1	0	0	0	0	0	0	0	0	0	0	0	0	0	0	1
fosfosal	0	0	0	0	0	0	0	0	0	0	0	0	0	0	0	0	0	1	0	0	0	0	0	0	0	1	0	0	0	1	0	1	0	1	0	0	0	0	0	0	0	0	0	0	1	0	0	0	1
fulvestrant	1	0	0	1	0	1	0	1	0	0	0	1	0	0	1	0	1	0	0	0	1	1	0	0	1	0	0	0	0	0	0	0	0	0	0	1	0	0	1	0	0	0	0	0	0	0	1	0	0
furaltadone	0	0	0	0	0	0	0	1	0	0	0	0	0	0	0	0	0	0	1	0	1	0	0	1	0	0	0	0	0	0	0	1	0	1	0	1	0	1	0	0	0	0	0	0	1	0	0	0	1
furazolidone	0	0	0	0	0	1	0	0	1	0	0	0	0	1	0	0	0	0	1	1	0	0	0	0	0	0	1	1	0	0	1	0	1	0	1	1	0	1	0	0	1	0	1	0	0	0	0	0	0
furosemide	0	0	0	0	0	1	1	1	0	0	0	0	1	0	0	0	0	0	1	0	0	0	0	0	0	0	0	0	0	0	0	0	0	0	0	0	0	0	0	0	0	1	0	0	0	0	0	0	0
fursultiamine	1	0	0	0	0	0	0	1	0	0	0	0	0	0	0	1	0	0	0	0	0	0	0	1	0	0	0	0	0	0	0	1	0	0	0	0	0	1	1	1	0	0	1	1	1	0	0	0	1
fusaric acid	1	1	0	0	0	0	0	0	0	0	0	0	0	0	0	0	0	0	0	0	0	0	1	0	1	1	0	0	1	0	0	0	0	0	0	0	0	0	0	1	0	1	0	0	0	0	0	0	1
fusidic acid	0	1	0	0	0	1	0	1	0	0	0	0	1	0	0	1	0	0	1	0	0	0	0	1	0	0	1	0	0	0	0	0	0	0	0	1	0	0	0	0	1	0	0	0	0	0	0	0	0
gabapentin	0	0	0	0	0	0	0	0	0	0	0	0	0	0	0	0	0	1	0	1	0	0	1	0	0	1	0	0	0	0	0	1	0	1	0	0	0	0	0	0	0	0	0	0	1	0	1	0	1
gabexate	0	0	0	0	0	1	1	1	1	0	0	0	0	0	0	0	0	0	0	1	0	0	0	0	0	0	0	0	0	0	0	0	1	0	0	0	0	1	0	0	0	0	0	1	1	0	0	0	0
galantamine	1	0	0	0	0	0	0	0	0	0	0	0	0	0	1	0	0	0	0	0	0	0	0	1	0	0	1	1	0	1	0	0	0	0	0	0	0	1	0	1	1	0	0	0	0	0	0	0	1
gallamine triethiodide	0	0	0	0	0	0	1	0	1	0	0	0	0	0	0	0	0	0	1	0	0	0	0	0	0	1	0	0	0	1	0	1	1	0	0	0	0	0	0	0	1	0	0	0	0	0	0	0	0
ganciclovir	0	0	0	0	0	0	0	0	1	0	0	0	0	0	1	0	0	0	0	0	0	0	0	1	0	0	0	1	0	0	0	1	0	0	0	0	0	0	0	0	0	0	0	0	0	0	0	0	1
gefitinib	1	1	1	0	0	0	0	0	1	1	0	1	1	1	1	1	1	1	1	0	0	0	1	1	1	1	1	1	1	1	1	1	0	1	1	0	1	0	1	1	1	0	1	0	1	0	0	0	0
geldanamycin	0	0	0	1	1	0	0	0	1	1	1	1	0	0	0	0	1	0	1	0	0	0	1	0	1	0	0	0	0	1	1	0	1	0	0	1	0	0	0	0	0	0	1	0	0	0	0	0	0
gelsemine	0	0	0	0	0	1	1	1	0	0	0	0	1	0	0	0	0	0	0	0	0	0	0	0	0	1	0	1	1	1	0	0	1	0	0	0	0	1	1	0	1	0	0	0	1	0	0	0	0
gemfibrozil	1	1	0	0	0	0	0	0	0	0	0	0	0	0	0	1	0	0	0	0	0	0	0	1	0	0	1	0	0	1	0	0	0	0	0	0	0	0	0	0	0	1	0	0	1	0	0	0	0
genistein	0	0	0	1	0	1	1	1	0	0	1	0	0	0	0	0	0	0	1	0	1	0	0	0	1	0	0	0	0	0	0	0	0	0	0	1	1	1	0	0	1	1	0	0	0	0	1	1	0
gentamicin	0	0	0	0	0	1	0	0	0	0	0	0	0	0	1	0	0	0	0	1	0	0	0	1	0	0	0	0	1	0	0	0	0	1	0	0	0	0	1	0	0	1	0	0	0	0	0	0	1
gibberellic acid	0	0	0	0	0	1	1	1	0	0	0	0	0	0	1	1	0	0	0	1	0	0	1	0	0	0	1	0	0	0	0	0	0	0	0	0	0	0	0	0	0	0	0	0	0	0	0	0	0
ginkgolide A	1	0	0	0	0	0	0	1	0	0	0	0	0	1	0	0	0	0	0	0	0	0	1	1	1	1	0	0	1	0	0	0	0	0	1	0	0	1	0	1	0	0	1	1	1	0	0	0	0
glafenine	1	0	0	0	0	0	0	1	0	1	0	0	0	0	0	0	0	0	0	0	0	1	0	0	1	0	1	0	0	0	0	0	0	0	0	0	0	0	0	0	0	1	0	0	0	0	1	1	0
glibenclamide	0	1	1	0	0	0	0	0	1	0	0	0	0	1	0	1	1	1	1	1	0	0	1	1	0	1	1	1	0	1	1	1	1	0	1	0	1	0	0	1	1	0	1	1	1	1	0	0	0
gliclazide	0	0	0	0	0	0	1	0	1	0	0	0	0	1	1	0	0	0	0	0	0	0	0	1	0	0	0	1	0	0	0	1	0	0	1	0	0	1	0	0	1	0	1	0	0	1	0	0	0
glimepiride	0	0	0	0	0	0	0	0	0	0	0	0	0	1	0	0	0	0	1	0	0	0	0	1	0	0	0	1	1	0	0	0	0	0	1	0	0	0	1	0	0	0	1	1	0	0	0	0	1
glipizide	1	0	0	0	0	1	1	0	0	0	0	0	0	0	1	0	0	1	0	0	1	0	0	1	0	1	0	0	0	0	0	0	0	1	0	0	0	1	0	0	1	1	0	0	0	0	0	0	0
gliquidone	0	0	0	0	1	0	1	0	0	0	0	0	0	0	0	0	0	1	0	1	0	0	0	0	0	0	1	0	0	0	0	0	1	0	1	0	0	1	0	0	0	0	0	0	1	0	1	0	0
glycocholic acid	1	1	0	0	0	0	0	0	0	0	0	0	0	0	0	0	0	1	0	0	0	0	0	1	0	1	0	1	0	0	0	0	0	0	0	0	0	1	1	0	0	0	0	0	1	0	0	0	0
glycopyrronium bromide	0	0	0	0	0	0	0	0	0	0	0	0	0	0	0	0	0	0	0	1	0	1	0	0	0	0	0	0	0	1	0	0	1	1	1	0	0	0	0	0	0	0	0	0	0	0	0	0	1
Gly-His-Lys	0	0	0	0	1	0	1	0	1	0	1	0	0	0	0	0	0	0	0	1	1	0	0	0	0	0	0	0	0	0	0	0	1	1	0	0	0	0	0	0	0	0	0	0	0	0	0	0	0
gossypol	0	1	1	1	0	0	1	0	0	1	0	1	1	0	0	0	0	1	1	1	0	1	1	0	0	0	0	1	0	0	1	1	1	0	1	0	1	0	0	0	0	0	1	0	0	1	1	0	0
gramine	0	1	0	0	0	1	0	1	1	0	0	0	0	0	0	1	0	0	1	0	0	0	0	0	0	0	0	1	0	1	0	0	0	0	0	0	0	0	0	1	1	0	0	0	1	0	0	0	0
griseofulvin	1	1	0	0	0	0	0	0	0	0	0	0	0	0	0	1	1	0	0	0	1	0	0	1	0	0	1	0	0	0	0	0	0	0	0	0	0	0	0	1	0	0	0	1	0	0	1	1	0
guaifenesin	0	0	0	0	0	0	1	0	0	0	0	0	0	1	0	0	0	0	0	1	0	1	0	1	0	0	0	0	0	0	0	1	1	1	1	0	0	1	0	0	0	0	0	0	0	1	0	0	1
guanabenz	0	0	0	1	1	1	1	1	0	1	1	0	0	0	0	0	0	0	0	0	1	1	0	0	0	0	0	0	0	0	0	0	1	1	0	0	0	1	0	0	0	1	0	0	0	0	0	0	1
guanadrel	0	0	0	0	1	0	0	0	0	0	0	0	0	0	0	0	0	0	0	1	1	0	0	0	0	0	0	0	0	0	0	0	0	1	0	0	0	0	0	0	0	0	0	0	0	0	0	0	1
guanethidine	1	0	0	0	0	0	0	0	0	0	0	0	0	0	0	0	0	0	0	0	0	0	0	0	0	0	0	0	0	0	0	0	0	1	0	0	0	0	0	0	0	0	0	0	1	0	0	0	0
guanfacine	0	0	0	1	0	0	0	0	1	0	0	0	0	0	0	0	0	0	0	0	0	0	0	1	0	0	0	0	0	1	0	0	0	1	0	0	0	1	0	0	0	0	0	0	1	0	0	0	1
GW-8510	0	0	1	0	0	0	0	0	1	0	0	1	0	1	0	0	1	0	0	0	1	1	0	0	1	0	0	0	0	0	1	0	0	1	0	0	1	1	0	0	0	0	1	0	0	0	0	0	0
H-7	0	0	1	0	0	0	0	0	1	0	0	1	0	1	0	0	1	0	0	0	1	0	0	0	1	0	0	0	0	0	0	0	0	0	0	0	1	1	0	0	0	0	1	0	0	0	0	0	0
H-89	1	1	0	0	0	0	0	0	0	0	0	0	0	0	0	0	0	0	1	1	0	0	0	0	0	1	0	0	0	1	0	0	0	0	0	0	0	0	1	0	0	0	0	0	0	0	0	0	1
halcinonide	0	1	0	1	0	0	0	0	0	0	0	0	0	0	0	0	0	0	1	0	0	0	0	0	0	0	0	0	0	1	0	0	0	0	0	0	0	0	0	0	0	0	1	0	0	0	0	0	0
halofantrine	0	0	0	1	1	1	0	0	0	0	0	1	0	0	1	1	0	0	0	1	0	0	1	0	1	0	1	0	0	0	0	0	0	1	0	1	0	0	0	0	0	0	0	0	0	1	0	0	1
haloperidol	0	0	0	1	0	1	1	1	0	1	1	1	1	0	0	1	0	0	1	0	1	0	0	0	0	0	0	0	0	0	0	0	0	1	0	1	0	0	0	1	0	1	0	1	0	1	0	0	0
harmaline	1	1	0	0	0	1	0	1	0	0	0	0	1	0	1	1	0	0	1	0	0	0	0	0	0	0	0	0	0	1	0	0	0	0	0	0	0	1	0	1	0	1	1	0	1	0	0	1	1
harmalol	1	0	0	0	0	1	0	1	0	0	0	0	0	0	0	0	0	0	0	0	0	0	0	0	0	0	0	1	0	1	0	0	0	0	0	0	0	1	0	0	0	0	0	0	0	0	0	1	0
harman	0	0	0	0	0	0	1	1	0	0	0	0	1	0	0	0	0	1	0	0	0	0	0	0	1	0	0	0	0	1	0	0	1	0	0	0	0	0	0	0	0	0	0	0	0	0	0	1	1
harmine	0	0	1	0	0	0	1	1	0	0	0	0	0	1	0	0	0	0	0	0	0	1	0	0	1	0	0	0	0	0	1	0	0	0	0	0	1	1	0	0	0	0	1	1	0	0	0	1	0
harmol	0	0	0	0	0	0	1	1	0	0	0	0	0	0	0	0	0	1	0	0	1	1	0	0	1	0	0	0	0	0	1	0	1	0	1	0	0	1	0	0	0	0	1	1	0	0	0	1	0
harpagoside	0	0	0	0	0	1	1	1	1	0	0	0	0	0	0	0	0	0	0	0	1	0	0	0	0	0	1	0	1	0	0	0	0	0	0	0	0	0	0	1	0	0	0	0	1	0	0	0	1
HC toxin	0	0	0	1	1	0	0	0	0	0	0	1	0	1	0	0	1	0	1	0	0	1	0	0	1	0	1	0	0	0	1	1	1	0	0	0	1	0	0	0	1	0	0	1	0	0	0	1	1
hecogenin	1	0	0	0	0	0	0	0	0	0	0	0	0	0	1	1	0	0	0	1	0	0	0	0	0	0	0	0	0	0	0	0	0	1	0	0	0	0	0	0	0	0	0	0	1	0	0	0	0
heliotrine	0	1	0	0	0	0	0	0	0	0	0	0	0	0	0	1	0	1	1	0	0	0	0	0	0	0	0	0	0	0	0	0	0	1	0	0	0	0	1	1	0	0	0	0	0	0	0	0	0
helveticoside	0	0	0	0	0	0	0	0	1	0	0	1	0	0	0	0	1	0	0	0	0	1	0	0	1	0	0	0	1	0	1	0	1	1	0	0	0	0	1	1	0	0	0	1	0	1	1	0	0
hemicholinium	1	0	0	0	0	0	0	0	0	0	0	0	0	0	1	0	0	1	0	0	0	0	1	0	0	1	1	0	0	1	0	1	0	0	0	0	0	0	0	0	1	0	0	1	1	0	0	0	1
heptaminol	0	0	0	0	0	1	0	0	0	0	0	0	1	0	0	1	0	1	0	0	0	0	0	0	0	1	0	0	0	1	0	0	0	0	0	0	0	0	1	0	0	0	0	0	1	0	0	0	1
hesperetin	1	1	0	0	0	0	0	0	0	1	1	0	0	0	1	0	0	1	0	0	1	0	0	1	1	1	0	1	1	0	0	1	0	0	0	0	0	0	1	1	1	1	0	0	0	0	0	1	0
hesperidin	0	1	0	0	0	1	0	1	0	0	0	0	1	0	0	0	0	1	1	0	0	0	0	1	0	1	0	1	0	0	0	1	1	0	0	0	0	0	0	0	0	0	0	0	0	0	0	0	0
hexamethonium bromide	0	0	0	0	0	0	0	1	0	0	0	0	0	0	1	1	0	0	0	0	1	0	0	0	0	0	0	0	0	1	0	0	0	0	0	0	0	0	1	1	0	0	0	0	0	0	0	1	0
hexestrol	0	0	0	0	1	0	0	0	0	1	1	0	1	1	0	0	0	0	0	0	0	1	0	1	0	0	0	1	1	0	1	1	1	0	1	0	1	1	0	1	1	1	1	0	0	1	1	0	1
hexetidine	0	1	0	1	0	1	1	1	1	1	1	1	0	0	0	0	0	0	0	1	0	1	0	0	0	0	1	1	0	0	1	0	1	0	0	1	0	1	0	1	0	0	0	1	0	1	1	0	0
hexylcaine	0	0	0	0	0	1	1	1	0	0	0	0	0	0	1	0	0	0	0	0	1	0	0	0	0	0	1	1	0	0	0	0	1	1	0	0	0	1	0	0	1	1	0	1	0	0	0	0	0
HNMPA-(AM)3	1	1	1	0	0	0	0	0	1	1	0	1	1	1	1	1	1	1	1	1	0	0	1	1	1	1	1	1	1	1	1	1	1	0	1	0	0	1	1	1	0	0	1	1	1	1	0	0	0
homatropine	0	0	0	0	0	0	1	0	0	0	0	0	0	0	1	0	0	0	0	1	0	0	0	0	0	0	1	1	0	0	0	0	0	0	0	0	0	1	0	0	0	0	0	0	1	0	0	0	1
homochlorcyclizine	0	0	0	1	0	1	1	1	0	1	1	1	1	0	0	0	0	0	0	0	0	0	0	0	1	0	0	0	0	0	1	0	0	0	0	1	0	0	0	0	0	0	0	1	0	1	1	0	0
homosalate	0	1	0	0	0	1	0	1	0	0	0	0	0	0	0	1	0	0	1	0	0	0	0	1	0	0	0	1	0	0	0	0	0	1	0	0	0	0	0	0	0	0	0	0	1	0	0	0	1
hycanthone	1	0	1	0	0	1	1	0	0	0	0	1	0	0	0	0	0	1	0	1	0	0	0	0	1	0	0	0	0	0	1	0	0	0	0	0	0	1	0	0	0	0	0	1	0	0	0	1	0
hydralazine	0	0	1	0	0	0	0	0	0	0	0	0	0	0	1	1	0	0	0	1	0	0	0	0	0	0	0	0	1	0	0	0	0	0	0	0	0	1	1	0	1	0	0	0	0	0	0	0	1
hydrastine hydrochloride	0	1	0	0	0	0	0	0	0	0	0	0	0	0	0	1	1	0	1	0	0	0	0	0	0	0	1	0	1	1	0	0	1	0	1	0	1	0	0	1	0	0	0	0	0	0	0	0	0
hydrastinine	1	1	0	0	0	0	0	0	0	0	0	0	0	0	0	0	0	0	1	0	0	0	0	1	0	0	1	0	0	0	0	1	0	0	0	0	0	0	0	0	0	1	1	0	0	0	0	0	0
hydrochlorothiazide	0	0	0	0	0	1	0	1	0	0	0	0	0	0	1	0	0	0	0	1	1	0	1	0	0	0	0	1	0	1	0	0	0	1	0	0	0	0	1	0	0	0	0	0	0	0	0	1	1
hydrocortisone	0	0	0	0	0	0	0	1	1	0	0	0	0	0	1	0	0	0	0	1	0	0	0	0	0	0	0	0	0	0	0	0	1	0	0	0	0	0	0	0	0	0	0	0	0	0	0	0	0
hydrocotarnine	1	0	0	0	0	0	0	1	0	0	0	0	1	1	0	0	0	0	1	0	0	0	0	1	0	1	0	0	0	0	0	0	0	0	1	0	0	1	0	1	1	0	1	0	1	0	0	0	0
hydroflumethiazide	0	0	0	0	0	0	0	0	0	0	0	1	1	0	0	0	0	1	0	0	0	1	0	0	1	1	1	0	0	0	0	0	0	0	0	0	0	0	0	0	1	0	0	0	0	0	0	0	0
hydroquinine	0	0	0	0	0	1	0	0	0	0	0	0	0	0	0	0	0	0	0	0	0	1	1	0	0	1	0	0	0	1	0	0	0	0	0	1	0	0	0	0	0	0	0	1	0	1	0	0	0
hydroxyachillin	0	0	0	0	0	0	1	1	0	0	0	0	0	0	1	0	0	0	0	1	0	1	0	1	0	0	0	0	0	0	0	0	0	0	0	0	0	1	0	1	0	0	0	0	0	1	0	0	0
hydroxyzine	0	0	0	0	0	0	0	1	0	0	0	1	0	0	0	1	0	0	0	1	0	0	0	0	0	1	0	0	0	1	0	0	0	1	0	0	0	0	1	1	0	0	0	1	1	0	0	0	1
hymecromone	0	0	0	0	0	0	0	0	0	0	1	0	0	0	0	0	0	1	0	0	0	0	0	0	0	0	0	0	0	0	0	1	0	0	0	0	0	0	0	0	0	0	0	0	0	0	0	1	0
hyoscyamine	0	1	0	0	0	0	0	1	1	0	0	0	1	0	1	0	1	0	1	0	0	0	1	0	0	1	1	0	0	1	0	1	1	0	1	0	0	0	0	1	1	0	0	1	1	0	0	0	0
IC-86621	0	0	0	0	0	0	0	0	1	0	0	0	0	0	1	1	0	0	0	1	0	0	0	0	0	0	0	0	0	0	0	0	1	1	0	0	0	0	1	0	0	0	0	0	0	0	0	0	0
idazoxan	0	0	0	0	1	0	0	0	0	0	0	0	1	0	0	0	0	1	0	0	0	0	0	1	1	1	0	0	0	1	0	0	0	0	0	1	0	0	1	0	0	0	0	0	0	0	0	0	1
idoxuridine	0	1	1	0	0	0	0	0	1	0	0	1	0	0	1	1	0	0	1	0	1	0	0	0	0	0	0	0	0	1	0	1	0	1	0	0	1	0	1	0	0	1	0	0	0	0	0	0	1
ifenprodil	1	1	0	0	0	0	0	0	0	0	0	1	0	0	1	1	0	0	0	0	0	0	1	1	0	0	1	1	1	0	0	0	0	0	0	0	0	0	0	1	0	0	0	1	0	1	0	0	0
ifosfamide	0	0	0	0	0	1	1	1	0	0	0	0	0	0	0	0	0	0	0	0	0	0	0	0	0	0	1	1	1	1	0	0	1	0	0	0	0	0	0	0	0	0	0	1	1	0	0	0	0
ikarugamycin	0	0	0	1	0	1	1	1	0	0	0	0	0	0	0	0	0	0	0	0	0	0	0	0	0	0	1	0	0	0	0	0	0	0	0	0	0	1	0	0	0	0	0	0	0	0	1	0	0
iloprost	0	0	0	1	1	1	1	1	0	1	1	0	0	0	0	0	0	0	0	1	1	1	0	0	0	0	0	0	0	0	0	0	0	1	0	1	0	0	1	0	1	1	0	0	0	0	1	1	0
imatinib	1	0	0	1	1	1	1	1	0	1	1	0	0	0	0	0	0	1	0	1	0	0	0	0	0	0	0	0	0	0	0	0	0	0	0	1	0	1	0	0	1	1	0	0	0	0	1	1	0
imidurea	0	1	0	0	0	0	0	0	0	0	0	0	1	0	0	1	0	0	1	0	0	0	0	1	0	1	0	0	1	1	0	0	0	0	0	0	1	0	1	1	0	0	1	0	1	0	0	0	1
imipenem	0	0	0	0	0	0	0	0	1	0	0	0	0	0	1	0	0	0	0	0	0	0	1	0	0	1	0	0	0	1	0	0	0	0	0	0	0	0	1	0	0	0	0	0	1	0	0	0	1
imipramine	0	0	0	1	0	0	0	0	1	1	1	1	0	0	0	1	0	0	1	0	0	0	0	0	0	0	0	0	0	1	0	0	0	0	0	0	0	0	0	0	0	0	0	1	0	0	1	0	0
indapamide	0	0	0	0	0	1	1	1	0	0	0	0	0	0	0	0	0	0	1	0	0	0	0	1	0	0	0	0	0	1	1	0	1	0	1	0	0	1	0	1	1	0	0	0	1	0	0	0	0
indometacin	0	0	0	1	1	0	0	1	0	1	1	0	0	0	0	1	0	0	0	0	1	0	0	0	0	0	0	0	0	0	0	0	0	1	0	0	0	0	0	0	1	0	0	0	0	0	0	1	1
indoprofen	0	0	0	0	1	0	1	0	0	0	0	0	0	0	0	0	0	0	0	0	0	1	0	0	0	0	0	0	0	1	0	0	0	1	0	1	0	0	0	0	0	0	0	0	0	0	0	0	1
iobenguane	0	1	0	0	0	0	0	0	0	0	0	0	0	0	0	1	0	0	0	1	0	0	1	0	0	0	1	0	0	1	0	0	0	0	0	0	0	0	0	0	0	0	0	0	0	0	0	0	0
iocetamic acid	0	0	0	0	1	1	0	0	0	0	0	0	0	0	0	0	0	0	0	1	0	1	0	0	0	0	1	0	1	0	0	0	1	0	0	0	0	0	0	1	1	0	0	0	0	0	0	0	1
iodixanol	0	0	0	0	0	1	1	1	0	0	0	0	0	0	0	0	0	0	0	1	0	1	0	0	0	0	0	0	1	0	0	0	1	0	0	0	0	0	1	0	0	0	0	0	0	0	0	0	0
iohexol	1	0	0	0	0	1	1	1	0	0	0	0	0	0	1	0	0	0	0	1	1	0	1	0	0	0	1	0	1	0	0	0	0	0	0	0	0	1	0	1	0	1	0	0	0	0	0	0	0
ionomycin	1	1	1	1	0	0	0	0	0	1	1	0	1	1	1	1	0	0	1	0	0	0	1	1	0	1	0	0	1	0	1	0	1	0	1	0	1	0	0	1	0	0	1	1	0	0	1	0	0
iopamidol	0	0	0	0	1	1	1	1	0	0	0	0	1	0	0	0	0	0	1	0	0	0	0	0	0	1	0	0	0	1	0	0	1	0	0	0	0	0	0	0	1	0	0	0	0	0	0	0	1
iopanoic acid	1	1	0	0	0	0	0	1	0	0	0	1	1	0	0	0	1	0	0	0	0	0	1	0	0	1	1	0	1	1	0	1	0	0	0	0	0	0	1	0	0	0	0	1	0	0	0	0	1
iopromide	0	0	0	0	0	0	1	1	0	0	0	0	0	0	0	0	0	0	0	0	0	0	0	0	0	0	1	0	0	0	0	0	0	1	0	0	0	0	0	0	0	1	0	0	0	0	0	0	0
ioversol	0	0	0	0	0	0	1	1	0	0	0	0	0	0	0	0	0	0	0	0	1	0	0	0	0	0	1	0	0	0	0	0	1	1	0	0	0	0	0	1	0	0	0	0	0	0	0	0	0
ioxaglic acid	0	0	0	0	0	0	0	0	1	0	0	0	0	0	0	0	0	0	0	1	0	0	0	0	0	0	1	0	0	0	0	0	0	1	0	0	0	1	0	1	0	0	1	0	0	0	0	0	0
ipratropium bromide	1	0	1	0	0	0	0	0	0	0	0	0	1	1	0	0	1	0	0	0	0	0	0	1	0	0	1	0	1	0	0	1	0	0	1	0	1	0	0	1	0	0	1	1	1	0	0	0	0
iproniazid	0	0	0	0	0	0	1	0	1	0	0	0	0	0	0	0	0	1	1	0	0	0	0	1	0	0	0	1	0	0	0	0	0	0	0	0	0	0	0	0	0	0	0	0	0	0	0	0	0
irinotecan	0	0	1	0	0	0	0	0	0	0	0	0	0	1	1	0	0	0	0	0	0	1	0	1	1	1	1	0	1	0	1	1	0	0	1	0	1	1	0	1	0	0	1	1	0	1	0	1	0
isocarboxazid	0	0	0	0	0	0	0	0	1	0	0	0	0	0	0	0	0	0	1	1	1	1	0	0	0	0	0	0	0	0	0	0	1	0	0	0	0	0	0	0	0	0	0	0	0	0	0	0	1
isoconazole	0	0	1	1	1	0	1	0	1	1	1	0	0	0	0	0	0	0	0	0	1	1	0	0	0	0	0	0	0	0	1	0	0	0	0	1	0	0	0	0	1	0	1	0	0	1	1	0	0
isocorydine	1	0	0	0	0	1	1	1	0	0	0	0	0	0	1	0	0	0	0	0	0	0	0	0	0	0	1	0	0	0	0	1	1	0	0	0	0	0	0	0	1	0	1	1	0	0	0	0	0
isoetarine	0	0	0	0	0	0	0	0	0	0	0	1	0	0	0	1	0	0	0	0	0	0	1	0	0	0	0	0	0	1	0	0	0	0	0	0	0	0	1	0	0	0	0	0	0	0	1	0	1
isoflupredone	0	0	0	1	0	1	0	0	1	0	0	0	0	0	0	0	0	0	0	1	0	0	0	0	0	0	0	0	1	0	0	0	0	0	0	0	0	1	1	0	0	0	0	0	0	0	0	0	0
isometheptene	0	0	0	0	0	1	1	1	1	0	0	0	0	0	0	0	0	0	0	1	1	0	0	0	0	0	0	0	1	0	0	0	0	0	0	0	0	1	0	0	0	0	0	0	0	0	0	0	0
isoniazid	1	0	0	0	0	1	1	1	0	0	1	0	0	0	0	0	0	0	1	0	1	0	0	0	0	0	1	0	0	0	0	1	0	0	0	0	0	1	0	0	1	0	0	0	0	0	0	0	0
isopropamide iodide	0	0	0	0	0	0	0	0	0	0	0	0	0	0	0	0	0	0	1	0	0	0	0	1	0	0	0	0	0	1	0	0	0	0	0	0	0	0	0	0	0	0	0	0	0	0	0	0	1
isosorbide	0	0	0	0	0	1	0	1	0	0	0	0	0	0	1	0	0	0	0	0	0	0	1	0	0	0	1	1	1	1	0	0	1	0	0	0	0	0	1	0	0	0	0	1	1	0	0	0	1
isotretinoin	0	0	1	0	0	0	1	0	0	1	0	0	1	0	1	0	0	1	1	0	0	0	0	0	0	0	1	0	1	0	1	0	0	0	0	1	0	0	0	0	1	0	0	0	0	0	1	1	0
isoxicam	0	0	0	0	0	1	1	1	1	0	0	0	0	0	0	0	0	0	1	0	0	1	0	0	0	1	0	0	0	0	0	0	1	0	0	0	0	1	1	0	0	0	0	0	0	0	0	0	1
isoxsuprine	0	0	0	0	0	0	0	0	0	0	0	0	0	0	0	0	1	0	0	0	0	0	1	0	0	0	0	0	1	1	0	1	0	0	0	0	0	1	1	1	0	0	1	0	0	0	1	0	1
isradipine	0	1	0	0	0	0	1	1	0	1	1	0	1	1	0	0	0	0	0	0	0	0	0	1	0	1	0	0	0	0	0	1	0	0	1	0	1	0	1	0	1	0	0	0	1	0	0	0	1
ivermectin	0	0	1	0	0	1	1	1	1	1	1	1	1	0	1	0	0	0	1	0	1	1	0	0	0	0	0	1	0	0	1	0	0	1	0	1	1	0	0	0	0	1	1	0	0	1	1	0	0
josamycin	0	0	0	1	0	0	0	0	0	0	0	0	0	1	0	1	0	1	0	1	0	0	1	0	0	0	0	0	1	1	0	0	1	0	1	0	1	0	0	1	0	0	1	0	0	1	0	0	0
kaempferol	0	0	1	0	0	0	0	0	1	1	1	0	0	0	1	0	0	1	0	0	1	0	0	0	1	0	0	1	0	0	0	0	0	1	0	1	1	0	0	0	1	1	0	0	0	0	0	1	1
kanamycin	0	0	0	0	0	0	0	0	0	0	0	0	0	1	0	0	0	1	0	0	0	0	0	1	0	0	1	0	1	0	0	0	0	0	1	0	0	0	0	1	0	0	0	0	0	1	0	0	1
karakoline	0	0	0	0	1	1	1	1	1	0	0	0	0	0	1	0	0	0	0	0	1	1	0	0	0	0	0	0	0	1	0	1	1	0	0	0	0	0	1	0	0	0	0	1	0	0	0	0	1
kawain	0	0	0	0	0	0	0	0	1	0	0	0	0	0	1	0	0	0	0	0	0	0	0	0	0	0	0	0	0	1	0	1	0	1	0	0	0	0	0	0	0	0	0	0	0	0	0	0	1
ketanserin	1	1	1	1	0	0	0	0	0	0	0	1	0	0	1	1	0	0	0	1	0	0	1	1	1	0	0	0	0	0	0	1	0	0	0	0	0	0	1	0	0	1	0	0	1	0	0	1	0
ketoconazole	0	0	0	1	0	0	0	0	1	0	0	0	0	0	0	1	0	0	0	0	0	0	0	0	0	0	0	1	0	1	0	0	0	0	1	0	1	1	0	1	0	0	0	0	0	0	1	0	0
ketoprofen	0	0	0	0	0	0	0	0	0	0	0	0	0	0	0	0	0	1	0	0	1	0	0	0	0	0	0	0	0	1	0	1	0	1	0	0	0	0	0	0	0	0	0	0	0	0	0	0	0
ketorolac	0	0	0	0	0	0	0	0	0	0	0	0	0	0	0	0	0	0	0	1	0	0	0	0	0	0	0	1	0	1	0	0	1	0	0	0	0	0	0	0	0	1	0	0	1	0	0	0	0
ketotifen	0	0	0	0	0	1	0	0	0	0	1	0	1	0	0	0	0	0	1	1	0	0	0	0	0	0	0	1	0	0	0	0	0	1	0	1	0	1	1	0	0	0	0	0	0	0	0	0	0
khellin	0	0	0	0	0	0	0	0	0	0	0	0	0	0	0	0	0	0	0	1	0	1	1	0	0	0	1	0	1	0	0	0	1	0	1	0	0	1	0	1	0	0	1	0	0	0	0	0	1
kinetin	1	1	0	0	0	0	0	0	0	0	0	0	0	0	1	1	0	0	0	0	0	1	1	0	1	0	0	1	0	0	0	1	0	0	0	0	0	0	1	0	0	0	0	1	0	0	0	1	0
labetalol	0	0	0	1	0	0	0	0	1	0	0	1	0	0	1	0	0	0	1	0	1	0	0	1	0	0	1	0	0	1	0	1	0	1	0	0	0	0	0	0	0	0	0	0	0	1	1	0	0
lactobionic acid	1	1	0	0	0	0	0	0	0	0	0	0	0	0	0	0	0	0	1	0	0	0	1	0	0	0	0	0	0	0	0	0	0	1	0	0	0	0	0	0	0	1	1	0	0	0	0	0	0
lanatoside C	0	0	0	0	0	0	0	0	1	0	0	1	0	0	0	0	1	0	0	0	0	1	0	0	1	0	0	0	1	0	1	0	0	1	0	0	0	0	1	1	0	0	0	1	1	1	1	1	0
lansoprazole	0	0	0	0	0	1	0	0	0	0	0	0	0	0	0	0	0	0	0	1	0	0	0	0	0	0	0	0	0	0	0	0	0	0	0	1	0	0	1	0	0	0	0	0	1	0	0	0	1
lasalocid	0	0	0	1	0	1	1	1	0	1	1	0	0	0	0	0	0	0	0	1	1	0	0	0	1	0	0	1	1	0	1	0	1	0	0	0	0	0	0	1	0	1	1	1	0	1	1	0	0
latamoxef	1	1	0	0	0	0	0	0	0	0	0	1	1	1	1	0	1	1	1	0	0	1	0	1	1	0	0	1	0	0	1	1	1	0	1	0	1	0	0	0	0	0	1	0	0	1	0	0	0
laudanosine	1	1	1	0	0	0	0	0	0	0	0	1	1	0	1	0	1	0	1	0	0	0	1	1	0	1	1	0	1	1	0	1	1	0	1	0	1	0	1	1	0	0	1	1	1	0	0	0	0
leflunomide	0	0	0	0	0	0	0	0	0	0	0	1	0	0	0	0	0	0	0	1	1	1	0	0	0	0	1	0	1	0	0	0	1	0	0	0	0	0	0	1	1	0	0	0	0	0	1	0	0
letrozole	0	0	0	0	0	1	1	1	1	0	0	0	0	0	0	0	0	0	0	0	0	0	0	0	0	0	0	0	0	1	0	0	0	1	0	1	0	0	0	0	1	1	0	0	0	0	0	0	1
levamisole	0	0	0	0	0	0	0	0	0	0	0	0	0	1	1	0	0	1	0	0	0	0	0	1	0	1	0	0	0	0	0	1	0	1	1	0	0	0	0	0	0	0	1	0	0	1	0	0	0
levcycloserine	0	1	0	0	0	1	0	1	0	0	0	0	0	0	0	1	0	0	1	0	0	0	0	1	0	0	1	0	0	0	0	0	0	1	0	0	1	0	0	1	0	0	0	0	1	0	0	0	0
levobunolol	0	0	0	0	0	1	0	1	0	0	0	0	0	0	1	0	0	0	0	1	0	0	0	0	0	1	0	0	0	1	0	0	0	0	0	0	0	0	1	0	1	0	0	0	0	0	0	0	1
levocabastine	0	1	0	0	0	0	0	1	0	0	0	0	1	0	0	1	0	0	1	0	0	0	0	0	0	0	0	0	0	1	0	0	0	0	0	0	0	0	1	0	1	0	0	0	0	0	0	0	1
levodopa	1	0	0	0	0	1	0	1	0	0	0	0	0	0	1	0	0	0	0	0	0	0	1	0	0	1	0	0	0	0	0	1	0	0	0	0	0	0	1	1	0	1	0	0	1	0	0	1	0
levomepromazine	0	0	1	1	0	1	0	1	1	1	1	1	1	0	0	0	0	1	1	1	1	0	0	0	0	0	1	0	1	0	1	0	1	0	0	1	1	0	0	1	1	0	0	1	0	1	1	0	1
levonorgestrel	1	1	0	1	0	0	1	1	1	1	1	0	0	1	1	0	0	0	0	0	0	0	0	1	0	0	0	1	1	0	0	0	1	0	0	0	1	0	0	0	1	1	0	0	0	0	1	0	0
levopropoxyphene	0	0	0	0	0	1	1	1	0	0	0	0	0	0	0	0	0	0	0	1	0	0	0	0	0	0	0	0	1	0	0	0	1	0	0	0	0	1	0	0	0	0	0	0	1	0	0	0	0
levothyroxine sodium	0	0	0	0	0	0	0	0	0	0	0	0	0	0	0	1	0	0	1	1	0	0	0	0	0	0	0	1	0	1	0	1	0	1	0	0	0	0	0	0	0	0	0	0	1	0	0	0	0
lidocaine	0	0	0	0	0	1	0	1	0	0	0	0	0	0	0	0	0	0	0	0	0	0	1	0	0	0	0	1	0	0	0	0	0	1	0	0	0	1	0	0	0	1	0	0	1	0	0	1	0
lidoflazine	0	0	0	1	0	0	0	0	0	0	1	0	0	1	0	0	0	0	0	0	1	0	0	0	0	0	1	0	1	0	0	0	1	0	1	0	0	1	0	1	0	0	0	0	0	0	1	0	0
lincomycin	0	0	0	0	0	1	0	1	0	0	0	0	0	0	0	1	0	0	0	0	0	0	0	0	0	0	0	0	0	0	0	0	0	0	0	0	0	0	0	0	1	0	0	0	0	0	0	0	0
liothyronine	1	1	0	0	0	0	0	1	0	0	0	0	1	0	0	1	0	0	1	0	0	0	0	0	0	0	1	0	0	1	0	0	0	1	0	0	0	0	0	1	1	0	0	0	0	0	0	1	0
lisinopril	0	0	0	0	0	0	0	0	1	0	0	0	0	0	0	0	0	1	0	0	0	0	0	0	0	0	1	1	0	0	0	0	0	0	0	0	0	0	0	0	1	0	0	0	0	0	0	0	0
lisuride	0	0	0	1	0	1	1	1	0	0	1	0	0	0	0	0	0	0	0	1	0	0	1	0	0	0	0	0	0	0	0	0	1	1	0	1	0	0	0	0	0	0	0	0	0	0	0	0	0
lithocholic acid	0	0	0	0	0	1	1	1	1	0	0	0	0	0	0	1	0	0	0	1	0	0	1	0	0	0	0	0	0	1	0	0	0	1	0	0	0	0	0	0	0	0	0	0	0	0	0	0	1
LM-1685	0	0	1	0	0	0	0	0	1	1	0	1	1	1	1	1	1	1	1	0	1	1	1	1	1	1	1	0	0	0	1	1	1	1	1	0	1	0	1	1	0	0	1	0	0	1	0	0	0
L-methionine sulfoximine	0	0	0	0	0	0	0	0	0	0	0	0	0	0	1	1	0	0	0	1	0	0	1	0	0	1	0	1	0	0	0	1	0	0	0	0	0	0	0	0	0	1	0	0	0	0	0	0	1
lobelanidine	1	1	0	0	0	0	0	1	0	0	0	0	0	0	0	0	0	0	0	0	0	0	0	0	0	0	1	0	0	0	0	0	0	0	1	0	0	1	0	1	1	0	1	1	1	0	0	0	0
lobeline	0	1	0	0	0	0	0	0	0	0	0	1	0	1	1	0	1	1	1	1	0	0	1	0	0	1	1	1	1	1	1	0	1	0	1	0	1	0	1	1	1	0	1	1	0	1	0	0	0
lomefloxacin	0	0	0	0	0	0	0	0	0	0	0	0	0	0	0	0	0	1	0	0	1	0	0	0	0	0	0	0	0	0	0	1	0	0	0	0	0	1	0	0	0	0	0	0	0	0	0	0	1
lomustine	1	1	1	1	1	0	0	0	0	1	0	0	1	0	1	0	0	1	1	0	0	0	0	1	1	1	0	0	1	1	1	0	0	0	1	1	0	0	1	0	1	0	0	0	0	1	0	1	0
loperamide	0	0	1	1	0	0	0	0	0	1	1	1	1	0	1	0	1	1	0	1	0	1	1	0	1	1	0	0	1	1	1	1	1	1	0	1	1	0	1	1	0	0	1	1	0	1	0	0	0
loracarbef	1	0	0	0	0	0	0	0	0	0	0	0	0	0	1	1	0	0	0	0	0	0	0	0	0	0	0	0	0	1	0	0	0	0	0	0	0	0	1	0	0	0	0	0	1	0	0	0	0
lorglumide	1	0	0	0	0	0	0	0	0	0	0	0	0	1	0	0	0	1	0	0	0	0	1	1	0	1	0	0	0	0	0	1	0	0	1	0	0	0	0	0	0	1	0	1	1	0	0	0	0
lovastatin	0	0	0	1	0	1	0	0	0	0	1	1	0	0	0	1	0	1	0	1	1	1	0	1	0	0	1	0	1	0	0	0	0	0	0	0	0	1	0	0	0	1	1	0	0	0	1	0	0
loxapine	0	0	0	1	1	1	0	1	0	1	1	0	0	0	0	0	0	0	0	1	0	0	1	0	0	0	0	0	0	0	0	0	1	0	0	0	0	0	1	0	0	0	0	0	0	0	1	0	0
lumicolchicine	1	1	0	0	0	0	0	0	0	0	0	0	0	0	0	0	0	1	0	0	0	0	1	0	0	1	0	0	1	1	0	0	0	0	0	0	0	0	1	0	0	1	0	0	1	0	0	1	1
luteolin	0	0	1	0	0	0	0	0	0	0	1	0	1	0	0	0	0	1	0	0	0	1	0	1	1	0	1	0	0	0	1	1	0	0	0	0	1	1	0	1	0	1	1	0	0	0	0	1	0
LY-294002	0	0	0	0	0	0	1	0	0	0	0	1	1	0	0	0	1	0	0	0	1	1	1	1	1	0	0	0	0	0	1	0	1	0	0	0	1	0	0	0	0	0	1	0	0	1	0	1	0
lycorine	0	1	0	0	0	0	0	0	1	0	0	0	1	0	0	0	0	0	1	1	0	1	1	0	0	1	0	0	1	1	1	0	1	0	1	0	0	0	0	1	1	0	0	0	0	1	0	0	0
lymecycline	0	0	0	0	0	0	0	0	1	0	0	0	0	0	0	0	0	0	0	0	0	0	0	0	0	0	0	1	0	0	0	0	0	0	0	0	0	0	0	0	0	0	0	0	0	0	0	0	1
lynestrenol	0	1	0	0	0	0	0	0	1	1	1	0	1	0	0	0	0	1	1	0	0	1	0	1	0	1	0	0	0	0	0	1	0	0	0	1	0	0	0	0	0	1	0	0	0	0	1	0	0
lysergol	0	0	0	0	0	0	0	0	0	0	0	0	0	1	0	0	0	1	1	0	0	0	1	1	0	1	0	0	1	0	0	1	0	0	1	1	1	0	1	0	0	0	0	1	0	0	0	1	0
mafenide	1	1	0	0	1	1	1	1	0	0	1	0	0	0	0	0	0	1	0	0	1	0	0	0	0	0	1	0	0	0	0	0	0	0	0	0	0	0	0	0	0	0	0	0	0	0	0	0	0
maprotiline	0	0	0	1	0	0	1	0	0	1	1	1	1	0	0	0	1	1	0	1	1	1	1	0	1	0	0	0	0	0	1	0	1	0	0	1	1	0	0	0	0	0	1	1	0	1	1	0	1
mebendazole	0	0	0	1	0	0	0	0	0	1	0	0	1	0	0	0	1	0	0	0	1	0	1	1	1	0	0	0	0	0	1	1	1	1	1	0	0	0	0	1	0	0	0	1	0	0	1	0	0
mebeverine	1	0	0	1	0	1	0	1	0	0	0	1	0	0	0	1	0	0	0	0	0	0	0	0	0	0	1	1	0	0	0	0	0	0	0	0	0	1	0	0	1	0	0	1	0	0	0	0	0
mebhydrolin	0	0	0	1	0	0	1	0	0	1	0	1	0	0	0	0	0	0	0	1	1	0	1	0	0	0	0	0	1	0	0	0	0	0	0	0	0	1	0	0	0	0	1	1	0	1	0	0	1
mecamylamine	0	0	0	0	0	1	0	1	1	0	0	0	0	0	0	0	0	0	1	0	0	0	0	0	0	1	0	0	1	1	0	0	0	0	0	0	0	0	1	0	0	0	0	0	1	0	0	0	1
meclocycline	0	0	0	0	0	0	1	1	0	1	0	0	0	0	0	1	0	0	0	0	0	1	0	0	0	0	1	0	1	1	1	0	1	0	1	0	0	0	0	1	1	1	1	0	1	0	0	1	0
meclofenamic acid	1	1	0	0	0	1	1	1	0	0	0	0	0	0	0	0	0	1	0	0	0	0	0	0	0	1	1	0	1	0	0	0	1	0	0	0	0	0	1	0	1	0	0	1	1	0	0	0	0
meclofenoxate	1	1	0	0	0	0	0	0	1	0	0	0	0	1	1	0	0	0	0	0	0	0	0	1	0	0	0	1	0	0	0	0	0	0	0	0	0	0	0	0	0	0	0	0	0	0	0	0	0
meclozine	1	0	0	0	0	0	0	0	0	1	0	1	1	0	0	0	0	0	0	0	0	1	0	1	1	0	0	0	0	0	1	0	0	0	0	0	0	1	0	0	0	0	1	0	0	1	0	0	0
medrysone	1	1	1	0	0	0	0	0	0	0	0	0	0	1	1	0	0	0	0	0	0	0	0	1	0	0	1	1	0	0	0	1	0	0	1	0	1	0	0	1	0	0	1	0	0	1	0	0	0
mefenamic acid	0	0	0	1	0	0	1	1	1	0	0	0	0	0	0	0	0	0	0	0	1	0	0	0	0	0	0	1	0	0	0	0	0	0	0	0	0	0	0	0	0	0	0	0	0	0	0	0	0
mefexamide	0	0	0	0	0	0	0	0	0	0	0	0	0	0	0	0	0	1	0	1	0	0	0	0	0	0	0	1	0	0	0	0	0	0	0	0	0	1	1	0	0	0	0	0	0	0	0	0	1
mefloquine	1	1	1	1	0	0	1	1	0	1	1	1	1	0	0	1	0	1	1	0	1	1	1	0	1	0	0	1	0	0	1	0	0	0	0	1	0	0	0	1	0	0	0	0	0	1	1	1	0
megestrol	0	0	0	1	0	0	0	0	0	1	1	0	0	0	0	1	0	1	0	1	0	0	0	0	0	1	1	0	0	0	0	0	0	0	0	0	0	1	0	1	0	1	0	1	0	1	0	0	0
meglumine	0	0	0	0	0	1	0	0	1	0	0	0	0	0	1	0	0	0	0	0	1	0	0	0	0	0	0	0	0	0	0	0	1	1	0	0	0	0	0	0	0	0	0	0	0	0	0	0	0
melatonin	0	0	0	0	1	1	0	1	1	0	0	0	0	0	1	0	0	0	1	0	0	0	0	0	0	0	1	0	0	1	0	0	1	1	0	0	0	0	0	0	1	0	0	0	0	0	0	0	0
memantine	0	0	0	0	0	1	0	0	0	0	1	0	0	0	0	0	0	1	0	1	0	0	0	0	0	1	0	0	0	0	0	1	1	0	0	0	0	1	0	0	1	0	0	1	0	1	0	0	1
menadione	0	0	1	0	1	0	0	0	0	0	0	0	1	1	1	0	1	0	1	0	0	1	1	1	0	0	1	1	1	0	1	1	1	0	1	1	1	1	0	1	1	0	0	1	0	1	1	0	0
mepacrine	0	0	0	0	0	1	0	1	0	0	0	1	0	0	0	0	0	1	0	0	1	1	0	0	1	0	0	0	0	0	1	0	0	1	0	1	0	0	1	0	0	1	0	1	0	0	1	1	0
mepenzolate bromide	0	0	0	0	0	0	0	1	1	0	0	0	0	0	1	1	0	0	0	0	0	0	0	0	0	0	1	0	0	0	0	0	0	1	0	0	0	0	0	1	1	0	0	0	1	0	0	0	0
mephenesin	0	0	0	0	0	0	0	0	0	0	0	0	0	0	0	0	0	0	0	0	1	0	0	1	0	0	0	0	0	0	0	0	0	0	1	0	0	1	0	0	0	0	1	0	0	0	0	0	1
mephentermine	0	0	0	0	0	0	0	0	0	0	0	0	0	0	0	0	0	0	1	0	0	0	1	1	0	0	0	0	0	0	0	1	1	0	1	0	0	1	0	0	0	0	0	0	0	0	1	0	1
mephenytoin	0	0	0	0	0	0	0	0	0	0	0	0	0	0	0	0	0	0	0	0	1	0	0	0	0	0	1	0	0	0	0	0	1	0	0	0	0	0	0	0	1	0	1	0	0	0	0	0	0
meprylcaine	1	0	0	0	0	1	0	1	1	0	0	0	0	0	0	1	0	0	0	1	1	0	0	0	0	0	1	1	0	0	0	0	0	0	0	0	0	1	0	0	0	1	0	0	1	0	0	0	0
meptazinol	1	1	0	0	0	1	0	1	0	0	1	1	1	0	0	1	0	0	1	0	1	0	0	0	0	0	0	1	0	1	0	0	1	0	0	0	0	0	0	0	0	1	0	1	0	0	0	0	0
mepyramine	0	0	0	0	0	0	0	0	0	0	0	0	1	0	0	0	0	0	1	0	1	0	0	0	0	0	0	0	0	0	0	0	0	1	0	0	0	0	0	0	0	0	1	0	0	0	0	0	0
merbromin	0	0	0	0	1	1	1	1	1	0	1	0	0	0	0	0	0	0	0	1	1	0	0	0	0	0	1	0	0	0	0	0	0	0	0	1	0	1	0	0	1	0	0	0	0	0	0	0	1
mercaptopurine	0	0	1	0	0	0	0	0	0	0	0	1	1	1	1	0	1	0	1	0	0	1	0	1	1	0	0	0	1	0	1	1	1	0	1	0	1	1	0	0	0	0	0	0	0	1	0	0	0
meropenem	0	1	0	0	0	0	0	0	0	0	0	0	0	0	0	0	0	0	0	0	0	0	0	0	0	0	0	0	0	1	0	0	0	0	0	0	0	0	1	0	0	0	0	0	0	0	0	0	1
mesalazine	1	1	0	0	0	0	0	0	0	0	0	0	0	1	1	0	1	1	1	0	0	0	1	1	0	0	1	0	1	1	1	1	1	0	1	0	1	0	1	1	1	0	1	1	1	0	0	0	0
mesoridazine	0	1	0	0	0	0	0	0	1	0	1	0	1	0	0	0	0	0	0	0	0	0	0	0	0	0	0	0	0	1	0	0	1	0	0	0	0	0	1	0	0	0	0	1	0	0	0	0	0
mestranol	0	0	0	0	0	0	0	0	0	1	1	0	0	1	0	0	0	1	0	0	0	1	1	1	0	0	0	0	1	0	1	1	0	0	0	0	1	1	1	1	0	1	0	0	1	1	1	0	1
metacycline	0	1	0	0	0	0	0	0	1	0	0	0	0	0	0	1	0	1	1	0	1	0	0	0	0	0	1	1	0	0	0	1	0	1	0	0	0	0	0	0	1	0	0	0	1	0	0	0	0
metamizole sodium	1	0	0	0	0	0	0	0	0	0	0	0	0	1	1	0	0	0	0	0	0	0	1	0	0	1	0	1	0	0	0	0	0	1	0	0	0	0	0	0	0	1	0	1	1	0	0	0	0
metampicillin	1	0	0	0	1	1	1	1	0	0	0	0	0	0	0	0	0	0	0	0	0	0	0	0	0	0	0	0	0	0	0	1	1	0	0	0	0	1	0	0	0	0	0	0	1	0	0	0	0
metanephrine	0	0	0	0	0	0	0	0	0	0	1	0	0	0	0	0	0	0	0	0	1	0	0	0	0	0	1	0	0	0	0	0	0	1	0	0	0	0	0	0	0	0	0	0	1	0	1	1	0
metaraminol	1	0	0	0	0	0	0	0	0	0	0	0	0	0	1	1	0	0	0	0	1	0	0	1	0	0	0	0	1	1	0	0	0	1	0	0	0	0	0	0	0	0	0	0	0	0	1	0	1
meteneprost	0	0	0	1	0	1	0	0	1	0	0	0	0	0	1	0	0	0	0	1	0	0	1	0	0	0	0	1	1	0	0	0	0	0	0	0	0	0	0	0	0	0	0	0	0	0	1	1	1
metergoline	1	0	0	1	0	0	0	0	0	1	1	1	0	0	1	0	0	1	0	0	1	1	1	0	1	0	0	0	0	0	1	1	0	0	0	1	0	0	0	0	0	0	0	1	0	1	1	0	1
metformin	1	1	1	0	0	0	0	0	1	0	0	1	0	1	1	1	1	1	0	0	0	0	1	1	1	1	1	1	1	1	0	1	1	0	1	0	1	0	1	1	0	0	1	1	0	0	0	0	0
methacholine chloride	0	1	0	0	0	0	0	0	0	0	0	0	0	1	0	0	0	0	0	0	0	0	0	1	0	1	0	1	0	0	0	0	0	0	1	0	0	0	0	0	0	0	0	1	1	0	0	0	0
methanthelinium bromide	0	0	0	0	0	0	0	0	0	0	0	0	0	0	0	1	0	0	0	1	0	0	0	0	0	0	0	1	0	1	0	0	0	1	0	0	0	0	0	0	0	0	0	0	0	0	0	0	1
methapyrilene	1	1	0	0	0	0	0	0	0	0	0	0	1	0	1	0	0	0	1	0	0	0	0	0	0	1	0	0	0	0	0	1	0	0	0	0	0	0	1	0	0	0	1	1	1	0	0	0	0
methazolamide	0	0	0	0	0	0	1	1	0	0	0	0	0	0	0	0	0	0	0	0	1	0	0	0	0	0	0	1	0	0	0	0	0	1	0	0	0	0	0	0	0	0	0	0	0	0	0	0	0
methocarbamol	0	0	0	0	0	0	0	0	0	0	0	0	0	0	0	0	0	0	1	1	1	0	0	0	0	0	0	1	0	0	0	1	0	1	0	0	0	0	1	0	0	0	0	0	1	0	0	0	0
methotrexate	0	0	1	0	0	0	1	0	0	0	0	1	1	1	1	0	0	0	0	0	0	0	0	0	1	0	0	0	0	0	0	0	0	0	0	0	1	1	0	0	0	1	1	0	0	1	1	0	0
methoxamine	1	1	0	0	0	0	0	0	0	0	0	0	0	0	0	1	0	0	0	1	0	0	0	1	0	0	0	0	0	0	0	0	0	0	0	0	0	1	0	0	0	1	0	0	1	0	0	1	0
methoxsalen	0	0	0	0	0	0	0	0	1	0	0	0	0	0	0	0	0	0	0	1	0	0	1	0	1	0	1	0	0	0	0	1	1	1	1	0	0	0	1	0	0	0	0	0	0	1	0	0	0
methylbenzethonium chloride	0	1	0	1	0	0	1	0	0	1	1	1	1	0	0	1	1	1	1	0	0	1	1	1	1	0	0	0	0	1	1	0	1	0	0	0	1	0	0	1	0	0	1	1	0	1	1	0	0
methyldopa	1	0	0	0	0	0	0	1	0	0	0	0	1	0	0	0	0	0	0	0	0	0	1	0	0	1	0	0	1	0	0	0	0	0	0	0	0	1	0	0	0	0	0	0	0	0	0	0	0
methyldopate	0	0	0	0	0	1	1	1	0	0	0	0	0	0	0	0	0	0	0	1	1	1	0	1	0	0	0	0	1	0	0	0	0	0	0	0	0	1	0	0	0	0	0	0	0	0	0	0	0
methylergometrine	1	1	0	0	0	1	1	1	0	0	0	1	1	0	0	0	0	0	1	0	0	0	0	1	1	0	0	0	0	0	1	1	0	0	0	0	0	1	1	0	1	0	0	0	1	0	1	1	0
methylprednisolone	0	0	0	0	0	0	0	0	0	0	0	0	0	0	0	0	0	0	1	0	1	0	0	0	0	0	0	1	0	0	0	1	0	1	0	0	0	0	0	0	1	0	0	0	0	0	1	0	0
meticrane	0	0	0	0	0	0	0	0	1	0	0	0	0	0	1	1	0	0	0	0	0	0	0	1	0	1	1	0	0	0	0	0	0	0	0	0	0	0	0	1	1	0	0	0	0	0	0	0	0
metitepine	0	0	0	1	0	1	1	1	0	1	1	1	1	0	0	0	0	0	0	0	0	1	0	0	0	0	0	0	0	1	0	0	0	0	0	1	0	0	0	0	0	1	0	1	0	0	1	0	1
metixene	0	0	1	1	0	0	1	0	0	1	1	1	0	0	0	0	1	1	0	0	0	1	1	0	1	0	1	0	1	1	1	0	1	0	0	1	1	0	1	1	0	0	1	1	0	1	1	0	1
metoclopramide	0	0	0	0	0	0	0	0	1	0	0	0	0	0	0	0	0	0	0	0	0	1	0	0	0	0	0	0	1	1	0	0	0	0	0	0	0	1	1	0	0	0	0	0	0	0	0	0	0
metolazone	1	0	0	0	0	0	0	0	0	0	0	0	0	0	1	1	0	0	0	0	0	0	1	0	0	1	0	0	0	0	0	0	0	0	0	0	0	1	1	1	0	0	0	1	1	0	0	0	0
metoprolol	0	1	0	0	0	1	0	0	0	0	0	0	0	0	1	0	0	1	1	1	0	0	0	0	0	0	1	1	1	0	0	0	1	0	0	0	0	0	1	0	0	0	1	0	0	0	0	0	0
metrifonate	0	0	0	0	0	0	0	0	1	0	0	0	0	0	0	1	0	1	1	0	0	0	0	0	0	1	0	1	0	1	0	0	0	0	0	0	0	0	1	0	0	0	0	0	1	0	0	0	0
metrizamide	0	0	0	0	0	0	0	0	1	0	0	0	0	0	0	1	0	0	1	1	0	0	0	0	0	0	0	0	0	1	0	0	0	1	0	0	0	0	0	0	1	0	0	0	0	0	0	0	0
metronidazole	0	1	0	0	0	1	0	0	1	0	0	0	1	1	1	0	0	0	1	1	0	0	0	1	0	1	1	1	1	1	1	1	1	0	1	0	1	0	1	0	1	0	1	0	1	0	0	0	0
metyrapone	1	1	1	0	0	0	0	1	1	0	0	1	0	0	1	0	0	0	0	0	1	0	0	0	1	0	1	1	0	0	0	0	0	0	0	0	0	0	0	0	0	1	0	0	0	0	0	1	0
mevalolactone	0	1	0	0	0	1	1	1	0	0	0	0	0	0	1	0	0	1	0	0	0	0	0	1	0	1	1	1	0	0	0	0	0	0	0	0	0	0	0	0	0	0	0	0	0	0	0	0	0
mexiletine	0	0	0	1	0	0	0	1	0	0	0	0	0	0	0	0	0	0	0	0	1	0	0	0	0	0	0	1	0	1	0	0	0	1	0	0	0	0	0	0	1	0	0	0	0	0	0	0	1
MG-132	1	1	1	1	1	0	0	0	1	1	0	0	1	0	0	1	1	0	0	0	0	0	1	0	0	0	0	0	0	1	1	0	0	0	1	1	0	0	0	1	0	0	0	1	1	1	0	1	0
MG-262	0	1	1	1	1	0	0	0	0	1	0	0	1	0	1	0	1	0	1	0	0	0	1	0	0	0	0	0	0	1	1	0	0	0	0	1	1	0	0	1	0	0	0	1	1	0	0	1	0
mianserin	0	0	0	1	0	0	0	0	0	0	1	0	0	0	0	0	0	0	1	0	1	0	0	0	0	0	1	0	0	1	0	0	1	1	0	0	0	0	0	0	0	1	1	0	0	0	0	0	1
miconazole	0	0	0	1	0	0	1	0	0	1	1	0	0	0	0	0	0	0	0	0	0	1	1	0	0	0	0	0	0	0	1	1	0	1	0	0	0	0	0	0	0	0	1	0	0	1	1	0	0
midecamycin	1	1	1	0	0	0	0	0	0	0	0	0	1	1	0	1	0	1	1	0	0	0	1	1	1	1	1	0	1	0	1	1	0	0	1	0	1	0	1	0	1	0	1	0	1	0	0	0	1
midodrine	1	0	0	0	0	0	0	0	0	0	0	0	0	0	0	0	0	0	0	1	1	0	0	0	0	0	0	1	1	0	0	0	0	0	0	0	0	1	1	0	0	0	0	0	0	0	0	0	0
mifepristone	1	0	1	0	0	1	0	1	0	1	0	1	1	0	1	1	0	0	1	0	0	0	0	0	0	0	0	0	0	0	1	0	0	0	0	0	1	0	0	0	0	0	1	0	0	0	1	0	0
milrinone	0	1	0	0	0	0	0	0	0	0	0	0	0	0	1	0	0	1	0	0	0	0	1	0	0	0	0	0	0	0	0	0	0	1	0	0	1	0	0	0	1	0	0	0	1	0	1	0	1
mimosine	0	0	0	0	0	0	1	0	0	0	0	0	0	0	0	0	0	1	0	1	1	0	1	0	0	0	0	0	0	0	0	0	1	0	0	0	0	0	0	0	0	0	0	1	0	0	0	0	0
minaprine	1	1	0	0	0	0	0	0	0	0	0	0	1	0	0	0	0	0	1	0	0	0	0	0	0	0	0	0	0	0	0	1	0	0	0	0	0	1	0	0	0	0	0	0	1	0	0	1	0
minocycline	0	0	0	0	0	0	1	1	0	1	0	0	0	0	0	0	0	0	1	0	1	1	0	0	0	0	0	0	0	0	1	1	1	0	0	0	0	1	0	0	0	0	0	0	0	0	0	0	0
minoxidil	0	0	0	0	0	1	1	1	0	0	0	0	0	0	0	0	0	0	0	0	1	0	0	0	0	0	0	0	0	0	0	0	1	0	0	0	0	0	0	0	0	0	0	0	0	0	0	0	0
mitoxantrone	1	0	1	0	0	1	0	0	1	0	0	0	1	1	0	0	1	0	0	0	0	0	0	0	0	0	0	0	0	0	1	0	0	0	0	0	0	1	0	0	0	0	1	0	0	0	0	1	0
MK-886	0	1	0	0	0	0	0	0	0	0	0	0	0	0	0	1	0	0	0	0	0	0	1	0	1	1	1	0	1	0	0	0	1	1	1	0	0	0	0	0	1	0	0	0	0	0	0	0	0
molindone	0	1	0	0	0	1	0	1	0	0	0	0	1	0	0	1	0	0	1	0	0	0	0	0	0	0	1	0	0	1	0	0	0	1	0	0	0	0	0	0	1	0	0	0	1	0	0	0	0
molsidomine	0	1	0	0	0	0	0	1	1	0	0	0	0	0	0	1	0	0	0	0	0	0	1	0	0	0	1	0	0	0	0	0	0	0	0	0	0	0	0	0	1	0	0	0	0	0	0	0	0
mometasone	0	0	0	1	1	1	1	1	1	1	1	0	0	0	0	0	0	0	1	0	1	1	0	0	0	0	1	0	0	0	1	0	1	1	1	1	0	0	0	1	1	0	0	0	0	1	1	0	0
monastrol	1	1	0	0	0	0	0	0	1	1	0	1	0	0	1	1	1	0	1	1	0	0	1	1	1	0	0	1	0	0	1	1	1	0	1	0	1	0	1	1	1	0	1	0	0	1	0	1	0
monensin	0	0	1	1	0	1	1	0	0	1	1	1	0	0	1	0	0	0	0	1	1	0	1	0	1	0	0	0	0	0	1	0	1	0	0	0	1	0	0	0	0	0	1	0	0	1	0	0	1
monobenzone	1	0	1	0	0	0	0	0	0	1	1	0	1	0	1	0	0	1	0	0	0	0	0	0	1	1	0	0	1	0	0	0	0	0	0	1	0	0	1	0	0	1	0	0	0	1	0	0	0
monocrotaline	0	0	0	0	0	0	0	1	0	0	0	0	0	0	0	1	0	0	0	0	0	0	0	0	0	0	0	0	0	1	0	0	0	0	0	0	0	0	0	0	1	0	0	0	1	0	0	0	1
monorden	0	0	0	0	1	0	0	1	1	1	0	1	0	0	0	1	1	0	1	0	0	0	1	0	1	0	0	0	0	1	1	0	0	0	0	1	0	0	0	0	1	0	0	0	0	0	0	0	0
moracizine	0	0	0	0	0	0	0	0	0	0	0	0	0	0	0	0	0	0	0	0	0	0	0	0	0	0	0	1	0	1	0	0	0	1	0	0	0	1	0	0	0	0	0	0	1	0	0	0	1
morantel	0	0	0	0	0	0	0	0	1	0	0	0	1	0	1	0	0	0	1	0	0	0	0	0	0	1	0	0	0	1	0	1	0	1	0	0	0	0	1	0	1	0	0	0	1	0	0	0	0
moroxydine	1	1	0	0	0	1	0	1	0	0	0	0	1	0	0	1	0	0	1	0	0	0	0	1	0	0	0	0	0	0	0	0	0	0	0	0	0	0	1	0	1	1	1	0	1	0	0	0	0
moxisylyte	0	0	0	0	0	0	0	0	1	0	0	0	1	0	0	1	0	0	1	0	0	0	0	0	0	1	0	0	0	1	0	0	0	0	0	0	1	0	1	0	1	0	0	0	0	0	0	0	0
moxonidine	0	0	0	0	0	0	0	1	1	0	0	0	0	0	0	0	0	0	0	0	0	0	0	0	0	0	0	0	0	1	0	0	1	0	0	0	0	0	0	0	1	0	0	0	0	0	0	0	1
MS-275	1	0	1	0	0	1	0	1	0	0	0	1	0	1	1	0	1	0	1	0	0	1	0	1	1	0	1	1	0	0	0	1	1	1	0	0	1	1	0	0	0	1	1	0	0	0	1	1	0
mycophenolic acid	0	0	1	0	0	0	0	0	0	0	1	1	0	1	0	1	1	0	0	0	1	0	0	0	1	0	1	0	0	0	0	0	1	0	0	0	1	1	0	0	0	0	0	0	0	0	0	0	1
myosmine	1	0	0	0	0	1	1	1	0	0	0	0	0	0	0	0	0	0	0	1	1	0	0	0	0	0	0	1	0	0	0	0	0	0	0	0	0	0	0	0	0	1	0	0	0	0	0	0	0
myricetin	0	0	1	0	1	0	1	0	0	1	1	0	0	0	0	0	0	0	0	1	0	0	0	0	0	1	0	0	0	0	0	0	1	0	0	1	0	0	0	0	0	0	0	1	0	1	1	0	0
N6-methyladenosine	1	1	0	0	0	0	0	0	0	0	1	0	0	0	0	1	0	0	0	1	0	0	1	0	0	1	1	0	0	0	0	0	1	0	0	1	0	0	0	0	1	0	0	0	0	1	1	0	1
nabumetone	1	1	0	0	0	0	0	0	0	0	0	0	0	0	0	0	0	1	0	0	0	0	1	0	0	0	1	0	0	0	0	1	0	0	0	0	0	1	0	0	0	1	0	0	0	0	1	0	0
N-acetyl-L-aspartic acid	0	0	0	0	0	0	1	0	0	0	0	0	0	0	0	0	0	1	1	0	0	0	0	0	0	1	0	1	1	0	0	0	1	0	1	0	1	1	1	0	1	0	0	0	0	0	0	0	1
N-acetyl-L-leucine	0	0	0	0	0	0	0	0	1	0	0	0	0	1	0	0	0	0	0	0	0	0	0	0	0	1	0	1	0	0	0	0	1	0	1	0	0	0	0	0	0	0	0	1	1	1	0	0	0
N-acetylmuramic acid	1	0	0	0	0	0	0	0	1	0	0	0	0	0	0	0	0	1	0	1	0	0	0	0	0	1	0	0	0	0	0	1	0	1	0	0	0	1	0	0	0	0	0	0	1	0	0	0	0
nadide	0	0	0	0	0	0	0	0	0	0	0	0	0	0	0	0	0	0	0	1	1	0	0	0	0	0	0	0	0	0	0	0	0	0	0	0	0	0	0	0	0	0	0	0	0	0	1	0	1
nadolol	0	0	0	0	0	1	0	0	1	0	0	0	0	0	1	1	0	0	1	1	0	0	0	0	0	1	1	0	0	0	0	0	0	0	0	0	0	1	0	1	1	0	0	0	0	0	0	0	0
nafcillin	1	1	0	0	0	1	0	0	1	0	0	0	0	0	1	1	0	0	0	0	0	0	0	0	0	0	1	0	0	1	0	0	0	0	0	0	0	1	0	1	1	1	0	0	0	0	0	0	1
naftidrofuryl	0	0	0	0	0	0	1	0	1	0	0	0	0	0	0	1	0	0	0	1	1	1	1	0	0	0	0	0	0	0	0	0	1	1	0	0	0	0	0	0	0	1	1	0	0	1	0	0	0
naftifine	0	0	0	0	0	0	1	0	0	1	0	0	1	0	0	0	0	0	0	0	0	1	0	0	0	1	0	0	0	1	1	0	1	0	0	0	0	0	0	0	0	0	1	0	0	1	0	0	0
naftopidil	1	1	0	0	0	0	0	1	1	0	0	1	0	0	1	1	0	0	0	1	1	0	0	0	0	0	0	0	0	1	0	0	0	0	0	0	0	0	0	0	0	1	0	0	0	0	0	0	1
nalbuphine	0	0	0	0	0	1	1	1	0	0	0	0	0	0	0	0	0	0	1	0	0	0	0	0	0	0	1	0	0	1	0	0	0	0	0	0	0	0	0	0	1	0	0	0	0	0	0	0	0
nalidixic acid	0	1	0	0	0	0	0	0	0	0	0	0	0	0	0	0	0	0	1	0	1	0	0	1	0	0	0	0	0	1	0	0	0	1	0	0	0	1	0	0	1	0	0	0	0	0	0	0	1
naloxone	1	1	0	0	0	0	0	0	0	0	0	0	0	0	0	1	0	1	0	0	1	0	0	1	0	1	1	1	0	0	0	0	0	1	1	0	0	0	0	0	0	0	0	0	0	0	0	0	0
naltrexone	0	0	0	0	0	1	1	1	0	0	1	0	0	0	0	0	0	0	1	0	1	0	0	0	0	0	1	0	0	0	0	0	0	1	0	0	0	0	0	0	0	1	0	0	0	0	0	0	0
napelline	1	1	0	0	0	0	0	0	0	0	0	1	0	0	0	1	1	0	0	0	0	0	1	0	0	1	0	0	1	0	0	0	0	0	0	0	0	0	1	1	0	0	1	1	0	0	0	0	0
naphazoline	1	1	0	0	0	0	0	0	0	0	0	1	0	0	1	1	0	0	0	0	0	0	0	0	0	0	0	0	0	1	0	0	0	1	0	0	0	0	1	0	1	0	0	0	0	0	0	0	0
naproxen	0	1	0	0	0	1	0	0	1	0	0	0	0	0	0	1	0	0	1	1	0	0	0	0	0	0	1	0	1	0	0	0	0	0	0	0	0	1	1	0	0	1	0	0	0	0	0	0	0
naringenin	0	0	0	1	0	1	1	0	1	0	1	0	0	0	1	1	0	1	0	1	1	0	0	0	0	0	1	0	0	0	0	0	0	0	0	0	0	1	0	0	1	1	0	0	0	0	0	0	0
naringin	1	1	0	0	0	0	0	0	0	0	0	0	1	0	0	0	1	0	0	0	0	0	1	1	1	0	1	1	1	0	0	0	0	0	0	0	0	1	0	1	0	0	0	1	1	0	0	0	0
natamycin	0	1	0	0	0	0	0	0	0	0	0	0	0	0	1	0	0	0	0	0	1	0	0	0	0	0	0	1	0	1	0	0	0	1	0	0	0	0	0	0	0	1	1	0	0	0	0	0	0
nefopam	0	0	0	0	0	0	0	0	0	0	0	0	0	0	1	0	0	0	0	1	0	0	1	0	0	0	0	0	0	1	0	0	1	0	0	0	0	0	0	1	0	1	0	1	0	0	0	0	1
neomycin	0	0	0	0	0	0	1	0	1	0	0	0	0	0	0	0	0	0	0	0	1	0	0	0	0	0	0	1	0	0	0	0	0	1	0	0	0	0	0	0	1	0	0	0	0	0	0	0	0
neostigmine bromide	0	0	0	0	0	0	0	0	1	0	0	0	0	0	1	1	0	1	0	1	0	0	0	0	0	1	0	0	1	0	0	0	0	1	0	0	0	0	0	0	1	0	0	0	1	0	0	0	0
netilmicin	0	0	0	0	0	0	0	0	1	0	0	0	0	0	0	1	0	0	0	1	0	0	0	0	0	0	0	0	0	0	0	0	0	1	0	0	0	0	0	1	0	1	1	0	0	0	0	0	0
nialamide	0	1	0	0	0	0	0	0	0	0	0	0	0	0	0	0	0	0	0	0	1	0	0	0	0	0	0	1	1	0	0	0	0	1	0	0	0	0	1	0	0	0	0	0	0	0	0	0	0
nicardipine	0	0	0	0	0	0	1	0	0	1	0	0	0	0	0	0	0	0	0	0	1	0	0	0	0	0	0	0	0	0	0	0	0	1	0	0	0	0	0	0	0	0	0	0	0	0	1	0	1
nicergoline	0	0	1	1	0	0	0	0	1	0	0	1	0	0	0	0	0	1	1	0	0	0	0	0	0	0	0	0	0	0	1	0	0	0	1	0	1	1	0	1	0	0	1	0	0	1	1	0	0
niclosamide	0	1	1	1	0	0	1	0	0	1	0	1	1	0	0	0	1	1	0	0	0	1	1	0	1	0	0	1	1	0	1	0	1	0	0	0	0	0	0	1	0	0	1	1	0	1	1	1	0
nicotinic acid	0	0	0	0	0	0	0	0	0	0	0	0	0	0	1	1	0	0	0	1	0	0	1	0	0	0	0	0	1	0	0	0	1	0	0	0	0	0	0	1	1	0	0	0	0	0	0	0	0
nifedipine	0	0	1	0	1	0	0	0	1	1	0	0	1	0	0	1	0	0	1	1	1	0	0	0	1	0	0	0	1	0	1	0	0	1	0	1	1	0	1	1	0	0	1	0	0	1	0	1	0
nifenazone	0	0	0	0	1	1	1	1	0	0	0	0	0	0	0	0	0	1	0	0	1	0	0	0	0	1	0	0	0	0	0	1	1	1	0	0	0	0	0	0	1	0	0	0	1	0	0	0	0
niflumic acid	0	0	0	0	0	0	1	1	0	0	0	0	0	0	0	0	0	0	0	1	0	0	0	0	0	0	0	0	0	0	0	0	1	0	0	0	0	1	1	0	1	0	0	0	1	0	0	0	0
nifuroxazide	0	0	1	0	0	1	1	0	0	1	0	0	1	0	0	0	0	1	0	0	0	1	0	1	1	1	0	0	0	0	1	1	1	0	0	1	0	0	0	0	0	0	0	0	0	0	1	0	1
nifurtimox	1	1	0	0	0	0	0	0	0	0	0	0	0	0	0	1	0	1	0	0	0	0	0	1	0	1	0	0	0	0	0	0	0	0	0	1	0	0	1	0	0	0	0	0	1	0	0	0	0
nilutamide	1	0	0	0	0	0	0	0	1	0	0	0	0	0	0	0	0	1	0	0	0	0	0	1	0	0	0	0	1	0	0	0	0	0	0	0	0	1	0	1	1	0	1	0	1	0	0	0	1
nimesulide	0	0	0	0	0	0	0	0	0	0	0	0	0	0	0	1	0	0	0	1	0	0	0	0	0	1	0	0	0	0	0	1	1	0	0	0	0	0	0	0	0	0	0	0	1	0	0	0	0
nimodipine	1	1	0	0	0	0	0	1	0	0	1	0	0	0	0	1	0	0	1	0	0	0	0	1	0	0	1	1	0	0	0	0	0	0	0	0	0	1	1	1	1	1	0	0	0	0	1	0	0
nipecotic acid	0	0	0	0	0	0	0	0	0	0	0	0	0	0	0	1	0	0	0	0	1	0	0	0	0	0	0	1	0	0	0	0	0	1	0	0	0	0	0	1	0	0	1	0	1	0	0	0	0
niridazole	0	0	0	0	0	0	0	0	0	0	0	0	0	0	0	1	0	0	0	0	0	0	0	0	0	0	0	0	1	0	0	0	0	1	0	0	0	0	0	1	0	0	1	0	1	0	0	0	1
nisoxetine	1	0	0	1	0	0	1	0	0	1	0	0	0	0	0	0	0	0	0	0	0	0	0	0	0	0	0	1	0	1	0	0	0	0	0	0	0	0	0	0	0	1	0	0	0	0	0	0	0
nitrendipine	0	1	1	0	0	0	0	1	0	0	0	0	0	1	0	1	1	0	1	1	0	0	1	1	0	1	0	1	1	1	0	0	0	0	1	0	1	1	1	1	0	1	1	1	0	0	0	0	0
nitrofural	1	1	0	0	0	1	0	1	0	0	0	0	0	0	0	0	0	1	1	0	0	0	0	1	0	1	0	0	1	0	0	0	0	0	0	1	0	1	1	0	1	0	1	0	1	0	1	0	0
nitrofurantoin	0	0	0	0	0	0	0	0	1	0	0	0	0	0	1	0	0	1	1	0	0	0	0	1	0	1	0	0	0	1	1	1	0	0	0	0	1	0	1	0	1	0	0	0	0	0	0	0	1
nizatidine	0	0	0	0	0	0	0	1	0	0	0	0	0	0	0	1	0	0	0	0	0	0	0	0	0	0	1	0	0	1	0	0	0	0	0	0	0	0	0	0	0	0	0	0	0	0	0	0	0
nocodazole	1	1	0	0	0	0	0	0	0	1	0	0	1	0	1	1	1	0	0	0	0	1	1	1	1	0	0	0	1	0	0	0	0	0	1	0	0	1	0	1	1	0	0	1	0	0	1	1	0
nomegestrol	1	0	0	1	0	1	1	0	0	0	0	0	0	0	0	0	0	0	0	0	0	0	1	0	1	0	0	1	1	0	0	0	0	0	0	0	0	1	1	0	0	0	0	0	0	0	1	0	0
nomifensine	0	0	0	0	0	1	1	1	1	0	1	0	0	0	0	0	0	0	1	0	1	0	0	0	0	0	0	1	0	0	0	0	0	0	0	1	0	0	0	0	0	0	0	0	0	0	1	0	0
norcyclobenzaprine	1	0	1	1	0	0	0	0	0	1	1	1	1	0	1	0	0	1	0	0	0	0	1	0	1	1	0	1	0	0	0	0	0	0	0	1	1	0	1	0	0	0	0	1	0	1	1	0	0
nordihydroguaiaretic acid	0	0	1	1	1	0	1	0	1	1	1	1	0	0	0	0	0	1	1	0	0	0	0	0	0	0	0	0	0	1	0	1	1	1	0	1	0	0	0	0	0	1	0	0	0	1	0	0	0
norethisterone	0	0	1	1	0	0	0	0	0	0	0	0	0	0	0	0	0	0	0	0	0	0	0	0	0	0	0	0	0	1	0	0	0	1	0	0	1	0	0	0	0	1	1	0	0	0	0	0	1
noretynodrel	0	0	0	1	1	0	0	0	0	1	1	0	0	0	0	0	0	1	1	0	0	0	0	0	1	0	0	0	1	0	0	0	1	0	1	1	1	0	1	0	0	1	0	0	0	0	1	0	0
norfloxacin	0	0	0	0	0	1	1	1	1	0	0	0	0	0	0	0	0	0	0	0	1	0	0	0	0	0	0	0	0	0	0	0	1	1	0	0	0	0	0	0	0	0	0	0	0	0	0	0	0
nortriptyline	0	0	1	1	0	0	0	0	0	1	1	1	1	0	1	1	0	1	0	1	0	0	1	1	1	0	0	0	0	0	1	0	0	1	0	1	0	0	0	0	0	0	0	1	0	1	1	0	0
noscapine	0	0	0	0	0	0	0	0	1	0	0	0	0	0	0	1	0	1	0	0	0	1	0	0	0	0	1	0	0	1	0	0	0	1	0	0	0	0	0	0	1	0	0	0	0	0	0	0	0
novobiocin	1	1	1	0	0	0	0	0	1	0	0	1	0	1	1	1	1	1	1	0	0	0	1	1	1	1	0	1	1	1	1	1	1	1	1	0	1	0	1	1	0	0	1	0	1	0	0	0	0
N-phenylanthranilic acid	0	0	0	0	0	0	0	0	1	0	0	0	0	1	1	1	0	1	0	0	1	1	0	1	0	0	0	0	0	0	1	1	0	0	1	0	0	1	0	1	1	0	0	0	1	0	0	0	0
NS-398	1	1	0	0	0	1	0	1	0	0	0	0	0	0	0	0	0	0	1	0	0	0	0	0	0	1	0	1	0	1	0	0	1	0	0	0	1	0	1	0	0	0	0	0	0	0	0	0	0
NU-1025	0	1	0	0	0	0	0	0	1	0	0	0	0	0	0	1	0	1	0	0	0	0	1	0	1	0	0	0	1	0	0	1	1	0	1	0	0	0	0	0	1	0	1	0	0	1	0	1	0
nystatin	1	0	0	0	0	0	1	0	0	0	0	0	0	1	0	0	0	0	0	1	1	0	1	0	0	0	0	0	1	0	0	0	1	0	0	0	0	1	0	1	0	0	1	1	0	1	0	0	0
octopamine	0	0	0	0	0	0	0	0	1	0	0	0	0	0	1	1	0	0	0	1	0	0	1	0	0	1	0	1	0	1	0	0	0	0	0	0	0	0	1	0	0	0	0	0	1	0	1	0	1
ofloxacin	1	1	0	0	0	1	0	1	0	0	0	0	0	0	0	1	0	0	1	0	1	0	0	1	0	0	0	0	0	1	0	0	0	1	0	0	0	1	0	0	0	0	0	0	0	0	0	0	0
oleandomycin	0	0	0	0	0	0	0	0	0	0	0	0	0	0	0	1	0	0	0	1	1	0	0	0	0	1	0	0	0	0	0	0	0	1	0	0	0	0	0	1	0	0	0	0	1	0	0	0	1
oligomycin	1	1	1	0	0	1	0	1	0	1	0	1	1	0	1	0	0	1	0	0	1	0	1	1	0	1	1	0	1	1	1	0	1	0	1	0	1	0	0	0	1	0	1	0	1	0	0	0	0
omeprazole	1	1	0	0	0	0	0	1	0	0	0	0	1	0	1	0	0	0	1	0	0	0	0	1	0	0	0	1	0	0	0	1	0	1	0	0	0	0	0	0	1	0	0	0	0	0	0	1	0
ondansetron	0	0	0	0	0	0	0	0	0	0	0	0	0	0	0	0	0	0	0	1	1	0	0	0	0	0	0	1	0	0	0	0	1	0	0	0	0	1	0	0	0	0	0	0	0	0	0	0	1
orciprenaline	0	0	0	0	0	1	1	0	0	0	0	0	0	0	0	0	0	0	1	0	0	0	0	1	0	0	0	0	0	1	0	0	0	0	0	0	0	0	1	0	1	1	0	0	0	0	1	0	1
orlistat	0	0	0	1	0	1	0	0	0	0	0	0	0	1	1	0	0	0	1	0	0	0	0	0	0	1	0	0	1	1	0	1	0	0	0	0	0	0	1	0	0	0	1	0	1	0	0	0	0
ornidazole	1	1	0	0	0	0	0	0	0	0	0	0	0	0	0	0	0	0	0	0	1	0	0	1	0	0	1	0	0	0	0	1	0	0	0	0	0	0	0	1	0	0	0	0	1	0	0	0	0
orphenadrine	0	0	1	1	0	0	0	1	1	0	1	1	1	0	0	1	0	0	1	0	0	0	0	0	0	0	0	0	0	1	0	0	0	0	0	0	0	0	1	0	0	0	0	1	0	1	0	0	1
ouabain	0	0	0	0	0	0	0	0	0	0	0	1	0	0	0	0	1	0	0	0	0	1	0	1	1	0	1	0	1	0	1	0	0	0	0	0	0	1	1	1	0	0	0	1	1	1	1	1	0
oxamic acid	1	0	1	0	0	0	0	0	1	0	0	1	0	1	1	1	1	1	0	0	1	0	1	1	1	1	1	0	0	0	1	1	0	1	1	0	1	1	1	1	0	0	1	1	1	1	0	0	0
oxamniquine	1	0	0	0	0	1	0	1	0	0	0	0	0	0	0	0	0	0	0	1	0	0	0	0	0	1	1	0	1	0	0	0	0	0	0	0	0	0	1	0	0	0	0	1	1	0	0	0	1
oxantel	0	0	0	0	0	0	0	0	1	0	0	0	0	0	1	1	0	1	1	1	0	0	0	0	0	0	0	1	0	0	0	1	1	1	0	0	0	0	0	0	0	0	0	0	1	0	0	0	0
oxaprozin	0	0	0	0	0	0	0	0	0	1	0	1	0	0	0	0	0	0	1	0	0	1	0	0	0	0	0	0	0	0	0	0	1	1	0	0	0	0	0	0	0	0	0	0	0	1	0	0	1
oxedrine	0	0	0	0	0	0	0	0	0	0	1	0	0	0	1	0	0	0	0	0	0	0	1	0	0	0	0	1	0	0	0	0	0	0	0	1	0	1	0	0	0	1	0	1	0	0	1	1	1
oxetacaine	0	1	0	1	0	1	0	0	1	0	1	0	1	0	0	0	0	1	1	0	0	0	0	0	0	1	1	0	0	1	0	1	0	0	0	0	1	1	1	0	0	1	0	0	1	0	1	0	0
oxolamine	0	0	0	0	1	0	0	0	0	0	0	0	0	0	0	1	0	0	1	1	0	1	0	0	0	0	1	0	1	0	1	0	1	1	0	1	0	0	0	1	0	0	0	0	0	0	0	0	1
oxolinic acid	1	0	0	0	0	1	0	1	1	0	0	0	1	0	0	0	0	1	1	0	0	0	0	0	0	0	1	0	0	1	0	0	0	0	0	0	0	0	0	1	0	0	0	1	0	0	0	0	0
oxprenolol	0	0	0	0	0	0	0	0	1	0	0	0	0	1	0	0	0	0	1	0	0	0	0	1	0	0	0	0	0	1	0	1	1	1	1	0	0	0	0	0	0	0	1	0	1	1	0	0	0
oxybenzone	0	1	0	0	0	1	0	0	0	1	0	0	0	0	0	0	0	0	1	1	0	0	0	1	0	0	0	0	0	0	0	0	1	0	0	0	0	0	0	0	0	1	0	0	1	0	1	0	1
oxybuprocaine	1	0	0	1	0	1	1	1	0	0	0	0	0	0	0	0	0	0	0	0	1	0	0	0	0	0	0	1	0	0	0	0	0	0	0	0	0	0	0	0	0	0	0	1	1	0	0	0	0
oxybutynin	1	1	0	0	0	0	0	0	0	1	0	0	0	0	0	0	0	0	0	0	0	1	1	0	0	0	0	1	0	0	0	1	0	1	0	0	0	0	0	0	0	0	1	0	0	0	0	1	0
oxymetazoline	0	0	0	0	0	0	0	0	0	0	0	1	0	0	0	0	0	0	0	0	0	0	0	0	0	0	0	0	1	0	0	0	0	0	0	0	0	0	0	0	0	0	0	0	0	1	0	0	0
oxyphenbutazone	0	0	0	0	1	0	1	0	0	1	0	1	1	0	0	0	0	0	0	0	0	1	0	0	0	0	1	1	1	0	1	0	1	0	0	1	0	0	0	0	1	0	0	0	0	0	1	0	1
oxytetracycline	0	0	0	0	0	0	0	0	0	0	0	0	0	0	0	0	0	0	1	0	1	0	0	0	0	1	0	0	0	1	0	1	0	0	1	0	0	0	1	0	0	0	0	0	0	0	0	0	0
ozagrel	0	0	0	0	0	0	0	0	1	0	0	0	0	0	1	1	0	0	0	1	0	0	0	0	0	0	1	1	0	0	0	0	0	1	0	0	0	1	0	1	0	0	0	0	1	0	0	0	0
paclitaxel	1	1	0	1	0	0	0	0	0	1	1	0	1	0	0	1	1	1	0	0	0	0	1	1	1	1	1	0	1	0	1	1	1	0	1	0	0	1	1	1	1	0	1	0	1	1	0	0	0
palmatine	1	1	0	0	0	0	0	0	0	0	0	1	1	0	1	1	1	1	1	0	0	0	1	1	0	1	0	0	1	1	0	0	0	0	1	0	0	0	1	0	0	0	1	1	1	0	0	0	1
pancuronium bromide	0	0	0	0	0	0	0	0	0	0	0	0	0	0	1	0	0	0	0	0	1	0	0	0	0	0	0	1	0	0	0	0	0	1	0	0	0	0	0	0	1	1	0	0	0	0	0	0	1
papaverine	0	0	0	0	0	0	0	0	1	0	0	1	0	0	1	0	0	0	0	0	0	1	1	0	1	0	0	1	0	0	0	1	0	0	0	0	1	0	0	0	0	1	0	0	0	1	1	0	0
paracetamol	0	1	1	0	0	0	1	1	1	0	0	0	0	0	0	1	0	0	1	0	1	0	0	1	0	0	1	1	0	0	0	0	0	1	0	0	0	0	0	1	0	0	0	1	0	0	0	0	0
pararosaniline	0	1	0	0	0	0	0	0	0	1	0	1	1	0	0	0	0	0	0	0	0	1	1	0	1	0	0	0	0	1	1	0	0	0	1	1	0	0	0	0	0	0	1	0	0	1	0	1	1
parbendazole	0	0	0	0	0	0	0	0	0	0	0	0	1	0	0	1	1	0	0	1	0	0	0	1	0	0	0	1	0	0	0	0	0	1	1	0	0	1	0	1	1	0	0	0	0	1	0	0	0
pargyline	1	1	0	0	0	0	0	0	0	0	0	1	0	1	0	0	1	0	0	0	0	0	1	0	0	1	0	0	1	0	0	1	1	0	1	0	0	0	1	1	0	0	0	1	1	1	0	0	0
paromomycin	0	0	0	0	0	0	0	0	0	0	0	0	0	0	0	0	0	1	0	1	0	0	0	0	0	1	1	0	0	0	0	0	1	0	1	0	0	0	0	0	0	0	0	0	0	1	0	0	0
paroxetine	0	0	0	1	1	0	1	1	0	0	0	0	0	0	0	0	0	1	0	0	1	1	0	0	0	0	0	0	1	0	0	0	1	0	0	0	0	0	1	0	0	0	0	0	0	1	0	0	0
parthenolide	0	0	1	1	1	0	0	0	1	1	1	1	1	0	0	0	1	0	0	0	0	0	0	1	0	0	0	0	0	0	1	0	0	0	0	1	0	1	0	0	0	0	0	1	0	1	0	1	0
pempidine	0	0	0	0	0	0	0	0	1	0	0	1	0	0	1	0	0	0	0	0	1	0	0	0	0	0	1	0	0	1	0	1	1	1	0	0	0	0	0	0	1	0	0	0	1	0	0	0	0
penbutolol	0	0	0	1	0	0	0	0	1	1	1	0	0	0	0	0	0	1	0	1	1	1	0	0	0	0	0	0	0	0	0	0	0	1	0	0	0	0	0	0	0	0	0	0	0	1	0	0	0
pentamidine	1	1	0	0	0	0	0	0	0	0	0	1	0	0	0	1	0	0	0	0	0	0	0	1	0	1	0	1	0	0	0	0	0	0	0	0	0	0	0	0	1	0	1	1	0	0	0	0	0
pentetic acid	0	0	0	0	1	0	1	1	0	0	0	0	0	0	1	1	0	0	0	0	1	0	0	0	0	0	0	1	0	0	0	0	0	1	0	0	0	0	0	0	0	1	0	0	0	0	0	0	1
pentetrazol	0	1	0	0	0	1	1	1	1	0	0	0	1	0	0	0	1	1	1	0	0	0	1	0	0	1	1	0	0	1	0	1	1	0	1	0	1	0	0	0	1	0	1	1	1	0	0	0	0
pentolonium	0	0	0	0	0	0	0	0	1	0	0	0	0	0	0	1	0	0	0	0	1	0	0	0	0	0	0	0	0	1	0	0	0	1	0	0	0	0	0	0	1	0	0	0	0	0	0	0	1
pentoxifylline	0	0	0	0	0	1	1	1	1	0	0	0	0	0	0	0	0	1	0	1	0	0	0	0	0	0	0	0	1	0	0	0	1	0	0	0	0	1	1	0	0	0	0	0	1	0	0	0	1
pentoxyverine	1	1	1	0	0	0	0	0	0	0	0	0	1	1	0	0	0	1	0	0	0	0	1	1	0	1	0	0	0	0	0	1	0	0	1	0	0	0	0	0	0	1	1	1	1	0	0	0	0
pepstatin	1	0	0	0	0	1	0	0	0	0	0	0	0	0	0	1	0	0	0	0	0	0	0	0	0	0	0	0	1	0	0	0	0	1	0	0	0	0	1	0	1	0	0	0	0	0	0	0	1
pergolide	0	0	0	0	0	0	0	0	0	0	0	1	0	0	0	0	0	0	0	0	0	0	1	0	0	0	1	0	0	0	0	0	1	0	0	0	0	0	1	0	0	0	0	0	0	1	1	0	0
perhexiline	1	1	0	1	0	0	0	1	0	1	1	1	1	0	0	0	1	0	0	1	0	1	1	0	1	0	1	0	1	0	1	0	0	0	0	0	0	0	1	1	0	0	1	1	0	1	1	1	0
perphenazine	0	0	1	1	0	0	1	0	0	1	1	1	0	0	0	0	0	1	0	1	1	1	1	0	1	0	0	0	1	0	1	0	1	0	0	1	0	0	0	1	0	0	0	1	0	1	1	0	0
PF-00539745-00	0	0	0	0	0	1	0	0	0	0	0	0	0	0	0	0	0	0	0	0	0	0	0	1	0	0	0	0	1	1	0	0	1	0	0	0	0	0	1	0	0	0	0	0	0	0	0	0	1
PF-00539758-00	0	0	0	0	0	0	0	0	1	0	0	1	0	0	1	0	0	0	0	1	1	0	0	0	0	0	1	0	1	0	0	0	0	0	0	0	1	0	0	1	0	0	1	0	0	0	0	0	0
PF-00562151-00	1	1	1	0	0	0	0	0	0	0	0	0	0	0	1	0	0	0	1	0	0	0	0	0	0	0	1	1	0	1	0	0	1	0	0	0	1	0	1	0	0	0	1	0	0	0	1	0	0
PF-00875133-00	1	0	0	1	0	0	0	0	0	1	1	0	0	0	0	0	0	0	0	1	0	0	0	0	0	1	0	0	0	1	0	1	0	0	0	0	1	0	1	0	0	0	0	0	0	0	1	0	0
PF-01378883-00	1	0	0	0	0	0	0	0	0	0	0	0	1	0	1	0	0	0	0	0	0	0	1	0	0	1	0	1	1	0	0	0	0	0	0	0	1	0	1	0	0	0	1	0	0	1	1	0	0
PHA-00665752	1	1	1	1	0	0	0	0	0	0	0	0	0	1	0	0	0	0	1	0	0	0	1	1	1	1	0	0	1	0	0	1	0	0	1	0	1	1	1	1	1	0	1	0	0	0	0	1	0
PHA-00745360	0	0	0	0	1	1	1	1	0	0	0	0	0	0	0	0	0	1	0	1	1	1	0	0	0	0	0	0	1	0	0	0	1	1	0	0	1	1	0	0	0	0	0	0	0	0	0	0	1
PHA-00767505E	1	0	0	0	0	0	0	0	0	0	0	0	0	0	0	0	0	0	1	0	0	0	1	0	0	0	0	0	0	1	0	0	0	0	0	0	0	0	1	0	0	0	0	0	0	0	0	0	0
PHA-00816795	1	1	1	0	0	1	0	0	0	0	0	0	0	0	1	0	0	0	0	0	0	0	0	0	0	0	0	0	0	0	0	0	0	0	0	0	0	0	1	0	0	0	0	0	1	0	0	0	0
PHA-00846566E	0	1	0	0	0	0	0	0	0	0	0	0	0	1	0	0	0	1	0	0	0	0	0	1	0	0	0	0	1	0	0	0	0	0	1	0	0	0	0	0	1	0	0	0	0	0	0	0	0
PHA-00851261E	0	0	0	1	0	0	1	1	0	0	0	0	0	0	0	0	0	0	1	0	0	1	1	1	1	1	0	0	0	1	0	0	0	0	1	0	0	0	1	0	1	0	1	0	1	0	0	1	1
phenacetin	1	0	0	0	0	0	0	0	0	0	0	0	0	0	0	1	0	0	1	1	0	0	0	0	0	0	1	0	0	0	0	0	1	0	0	0	0	0	0	0	0	0	0	1	1	0	0	0	1
phenanthridinone	0	0	0	0	0	1	1	1	0	0	0	0	0	0	0	0	0	0	0	0	1	1	0	0	1	0	0	0	0	0	0	0	0	1	0	0	0	0	0	0	0	1	0	0	0	0	0	1	0
phenazone	1	1	0	0	0	1	1	1	0	0	0	0	1	0	0	1	0	1	1	0	0	0	0	0	0	0	0	0	0	0	0	1	0	0	0	0	0	1	1	0	1	1	0	0	1	0	0	0	1
phenazopyridine	1	0	0	1	0	0	0	0	0	1	0	1	1	0	1	0	0	1	0	1	1	1	0	1	1	0	1	0	0	0	0	1	0	0	0	1	0	0	0	1	0	0	0	0	0	1	1	1	0
phenelzine	0	0	0	0	0	0	0	1	0	0	0	0	0	0	0	0	0	0	1	0	0	1	0	0	0	0	0	1	0	1	0	0	1	0	0	0	0	0	1	0	0	0	0	0	0	0	0	0	0
pheneticillin	0	1	0	0	0	1	0	0	0	0	0	0	0	0	0	0	0	0	0	1	0	0	0	0	0	0	1	0	1	0	0	0	0	0	0	0	0	1	0	0	1	0	0	0	0	0	0	0	0
phenformin	0	0	0	0	0	0	0	0	1	0	0	0	0	0	1	0	0	1	0	1	1	0	0	0	0	0	0	0	0	0	0	1	0	1	0	0	0	0	0	0	0	0	0	0	0	0	0	0	0
phenindione	0	0	0	0	0	0	0	1	1	0	0	0	0	0	1	0	0	0	0	0	1	0	0	0	0	0	0	1	0	0	0	0	0	1	0	1	0	0	0	0	0	0	0	0	0	0	0	0	1
pheniramine	0	0	0	0	0	1	1	1	0	0	1	0	0	0	0	0	0	0	0	1	0	0	0	0	0	0	0	0	0	0	0	0	1	0	0	0	0	1	0	0	0	0	0	0	1	0	0	0	0
phenoxybenzamine	1	0	1	0	1	0	0	0	0	1	1	1	1	1	1	0	0	0	1	0	0	0	0	1	1	0	0	1	0	0	1	1	0	0	1	1	0	1	0	1	0	0	0	1	0	0	1	1	0
phensuximide	1	0	0	0	0	0	1	0	0	0	0	0	0	0	1	0	0	0	0	0	0	0	0	0	0	1	0	0	0	0	0	0	0	0	0	0	0	0	0	0	0	0	0	0	1	0	0	0	0
phentolamine	0	0	0	1	0	0	1	1	0	0	1	0	0	0	0	0	0	0	0	0	1	0	0	1	0	0	0	0	0	0	0	1	0	1	0	0	0	1	0	0	0	0	1	0	0	1	1	0	0
phenyl biguanide	0	0	0	0	0	1	0	0	1	0	0	0	0	0	0	1	0	0	0	0	1	1	0	0	0	0	0	0	1	0	0	0	0	1	0	1	0	0	0	0	1	1	0	0	0	0	0	0	0
phenylpropanolamine	0	0	0	1	1	0	0	1	0	0	0	0	0	0	0	0	0	0	0	0	1	0	0	0	0	0	0	0	0	0	0	0	0	1	0	0	0	0	0	0	0	0	0	0	1	0	0	0	0
phthalylsulfathiazole	1	1	0	0	0	0	0	1	0	0	0	0	0	1	1	0	0	0	0	0	0	0	0	1	0	0	1	1	0	0	0	0	0	0	1	0	0	0	0	1	0	0	0	1	0	0	0	0	0
physostigmine	0	1	0	0	0	0	0	0	1	0	0	0	0	1	1	0	0	0	0	0	0	0	0	1	0	0	1	0	0	0	0	1	0	0	1	0	0	1	0	1	0	0	0	0	0	0	0	0	0
picotamide	0	0	0	0	0	0	0	0	0	0	0	0	0	0	0	0	0	0	0	1	1	0	0	0	0	0	0	0	0	0	0	0	0	0	0	0	0	1	0	0	0	0	0	0	0	0	0	0	0
picrotoxinin	0	0	0	0	0	0	1	1	0	0	0	0	0	1	1	0	0	1	0	0	0	0	0	0	1	1	0	1	0	0	0	1	1	0	0	0	0	0	0	0	0	0	0	1	1	1	0	1	0
pilocarpine	0	0	0	0	0	0	0	0	1	0	0	0	0	0	0	0	0	0	0	1	0	0	0	0	0	0	0	0	0	1	0	0	0	1	0	0	0	0	0	0	0	1	0	0	0	0	0	0	1
pimethixene	0	0	0	1	0	0	0	0	0	1	1	1	0	0	0	0	0	1	0	1	1	0	0	1	0	0	0	0	0	0	1	1	0	1	0	0	0	0	0	0	0	0	0	1	0	1	0	0	0
pimozide	1	1	1	1	0	0	0	0	0	1	1	1	1	0	0	1	1	0	1	0	0	1	1	1	0	0	1	1	1	0	1	1	0	0	1	0	0	0	0	1	1	0	1	0	0	1	1	0	0
pinacidil	0	0	0	0	0	0	0	0	1	0	0	0	0	0	0	0	0	1	1	0	0	0	1	0	1	1	0	0	0	0	0	1	0	0	0	0	1	0	0	0	1	0	1	0	0	0	0	1	0
pindolol	0	0	0	0	0	1	1	1	0	0	0	0	0	0	0	0	0	0	0	0	0	0	0	0	0	0	0	0	0	0	0	0	0	1	0	0	0	0	0	0	0	0	0	0	0	0	1	0	1
pioglitazone	1	1	1	0	0	1	0	0	0	0	0	0	0	0	1	0	0	0	0	0	0	0	0	1	0	1	0	1	1	1	0	0	0	0	1	0	1	0	1	0	0	0	1	1	1	0	0	1	0
pipemidic acid	1	1	0	0	0	1	0	1	0	0	0	0	1	0	1	0	0	0	0	0	0	0	0	1	0	0	0	0	0	0	0	1	0	0	0	0	0	1	1	0	0	0	0	0	1	0	0	0	1
pipenzolate bromide	0	0	0	0	0	0	0	0	1	0	0	0	0	0	0	0	0	1	0	0	0	0	0	0	0	0	0	0	0	0	0	0	0	1	0	0	0	0	0	0	0	0	0	0	0	0	0	0	1
piperacetazine	0	0	0	1	0	0	1	0	0	1	1	1	1	0	0	0	0	1	1	0	0	0	0	0	1	1	0	0	0	1	0	0	1	0	0	0	0	0	1	0	0	0	0	1	0	1	1	0	0
piperacillin	0	0	0	0	0	0	0	0	1	0	0	0	0	0	0	1	0	0	0	0	0	0	1	1	0	1	0	0	0	1	0	0	0	1	0	0	0	1	1	0	1	0	0	0	1	0	0	0	1
piperidolate	1	1	0	0	0	0	0	0	0	0	0	0	0	0	0	0	0	0	0	0	0	0	1	0	1	0	0	1	0	0	0	1	0	0	0	0	0	0	0	0	0	0	0	1	1	0	0	0	0
piperine	1	0	0	0	0	0	0	0	0	0	0	0	1	0	0	1	0	1	1	0	0	0	0	1	0	0	0	0	0	1	0	0	0	1	1	0	0	1	0	0	1	0	1	0	1	0	0	0	1
piperlongumine	0	0	1	0	1	0	0	0	1	1	0	1	1	1	0	0	1	1	1	0	0	1	1	1	0	0	0	1	1	0	1	1	0	0	1	1	1	0	0	1	0	0	0	1	1	0	0	1	0
piracetam	1	0	0	0	0	0	0	1	1	0	0	0	0	0	1	1	0	0	0	0	1	0	0	0	0	0	1	0	0	0	0	1	0	1	0	0	0	0	0	1	0	0	0	0	1	0	0	0	0
pirenperone	0	0	0	1	0	0	0	0	0	1	0	0	0	0	0	0	0	1	0	1	0	0	1	0	0	0	1	1	0	0	0	1	0	1	0	0	0	0	0	0	0	0	0	1	0	0	0	0	1
pirenzepine	0	0	0	0	0	0	0	0	1	0	0	0	0	0	1	0	0	0	0	0	1	0	0	0	0	0	0	0	0	0	0	0	0	0	0	0	0	0	0	0	0	0	0	0	0	0	0	0	0
piretanide	0	0	0	0	0	1	1	0	0	0	0	0	0	0	0	0	0	0	1	0	0	0	0	0	0	0	0	0	0	1	0	0	1	1	0	0	0	0	0	0	0	0	0	0	0	0	0	0	1
piribedil	1	1	1	1	0	0	0	1	0	0	0	1	1	0	1	1	1	0	0	0	0	0	1	0	0	0	1	0	0	1	0	1	0	0	0	0	0	0	1	1	0	1	0	1	0	0	0	1	0
pirinixic acid	0	0	1	0	0	0	1	0	0	0	0	0	0	1	1	0	0	1	1	0	1	0	0	1	0	1	1	0	0	0	0	1	1	1	1	0	1	0	1	1	1	0	1	0	1	1	0	0	0
pirlindole	0	0	0	1	0	0	1	0	0	0	0	1	0	0	0	0	0	1	0	1	0	0	0	0	0	0	0	0	0	0	0	0	1	0	0	0	0	0	0	0	0	0	0	0	1	1	0	0	0
piromidic acid	0	0	0	0	0	0	0	0	1	0	0	0	0	0	0	1	0	0	1	1	0	0	0	1	0	0	0	1	0	0	0	0	0	1	1	0	0	1	0	0	1	0	0	0	0	0	0	0	1
piroxicam	0	0	0	0	0	1	1	1	0	0	0	0	0	0	0	0	0	1	1	0	0	0	1	0	0	1	1	0	0	1	0	1	0	1	0	0	0	0	0	0	0	0	0	0	1	0	0	0	0
pivampicillin	1	1	0	0	0	0	0	1	1	0	0	1	1	0	1	1	0	0	0	0	0	0	1	1	0	0	1	1	0	1	0	1	0	0	0	0	0	0	0	1	0	1	0	0	1	0	0	1	1
pivmecillinam	0	0	0	0	0	0	0	0	0	0	0	0	0	1	0	0	0	0	0	0	0	0	0	0	0	0	0	0	1	0	0	0	0	1	1	0	0	1	1	0	0	0	1	0	1	0	0	0	1
pizotifen	0	0	1	1	0	0	0	0	0	1	1	0	1	0	0	0	0	0	0	1	1	0	0	0	0	0	0	0	0	1	1	0	0	0	0	0	0	1	0	0	0	0	0	1	0	1	0	0	0
PNU-0230031	1	0	1	0	0	0	1	1	0	0	0	0	1	0	0	0	0	1	0	0	0	0	0	0	1	1	0	1	0	1	0	1	0	0	0	0	0	0	0	0	0	0	0	0	0	0	0	1	0
PNU-0251126	0	0	1	0	0	0	0	0	0	0	0	0	0	0	0	0	0	0	0	0	1	0	0	0	1	0	0	0	0	0	0	0	0	0	0	0	0	1	0	0	0	0	0	0	0	0	0	1	1
PNU-0293363	0	0	1	0	0	0	0	0	1	0	0	0	0	0	1	0	0	1	0	1	0	0	0	0	1	0	0	0	0	0	0	0	1	1	0	0	0	0	0	0	0	0	0	1	0	0	0	0	1
podophyllotoxin	0	1	0	1	0	1	1	0	0	1	0	0	1	0	0	1	0	0	0	1	1	0	0	0	0	0	1	0	0	0	0	0	0	0	0	1	0	0	0	0	0	1	0	0	0	1	1	0	0
practolol	1	1	0	0	0	1	0	1	0	0	0	1	1	0	1	1	1	0	0	0	0	0	1	1	1	0	1	0	0	0	0	1	0	0	0	0	0	0	0	1	1	0	0	0	1	0	0	0	0
pralidoxime	1	1	0	0	0	1	0	1	1	0	0	0	0	0	1	1	0	0	1	1	1	0	0	0	0	0	1	1	0	1	0	0	0	1	0	0	0	0	0	1	1	0	0	0	0	0	0	0	0
pramocaine	0	0	0	0	0	0	0	1	0	0	0	1	0	0	1	0	0	0	0	0	0	0	0	0	0	0	0	0	1	0	0	0	1	0	0	0	0	0	1	0	0	0	0	0	1	1	0	1	0
prasterone	0	0	0	1	0	0	0	0	0	1	0	0	0	1	0	0	0	1	1	0	0	0	1	1	0	0	1	0	1	1	1	1	1	0	1	0	1	1	0	1	1	1	0	0	0	0	0	0	1
praziquantel	0	0	0	0	0	0	0	0	0	0	0	0	0	0	0	0	0	1	0	1	0	0	0	0	0	0	0	0	0	0	0	1	0	0	0	0	0	0	0	0	0	0	0	0	0	0	0	0	0
prazosin	1	0	0	1	0	1	1	1	0	0	0	0	0	0	0	0	0	0	0	0	1	1	0	1	0	0	0	1	0	0	0	0	0	1	0	0	0	1	0	0	0	1	0	0	0	0	0	1	1
prednicarbate	0	0	0	1	0	0	1	0	1	0	0	0	0	0	0	0	0	0	1	0	0	0	0	0	0	0	0	1	1	0	0	0	0	0	0	0	1	1	0	0	1	0	0	0	0	0	0	0	0
prednisolone	0	0	0	0	0	1	0	0	0	0	0	0	0	0	0	0	0	0	0	0	0	0	0	0	0	0	0	1	0	0	0	0	0	0	0	0	0	0	0	0	0	1	0	0	0	0	1	0	0
prednisone	0	0	0	1	1	1	1	1	0	0	1	0	0	0	0	0	0	0	0	0	1	0	0	0	0	0	0	1	0	1	0	0	0	1	0	1	0	0	0	0	0	1	0	0	0	0	1	0	1
pregnenolone	0	0	0	0	1	0	0	1	0	1	1	0	0	0	0	0	0	0	0	1	1	0	0	0	0	0	0	0	0	0	0	0	1	0	0	0	0	0	0	0	0	1	1	1	1	0	0	0	0
prenylamine	0	1	1	1	0	0	0	0	0	1	1	1	1	0	0	0	1	1	1	0	0	1	1	1	0	0	0	0	1	1	1	0	1	0	1	1	0	0	0	1	1	0	1	1	0	1	1	0	0
Prestwick-1080	1	1	0	0	0	1	0	1	1	0	0	0	1	0	0	1	0	0	1	0	0	0	0	0	0	0	0	0	0	1	0	0	0	0	0	0	0	0	1	0	0	0	0	1	1	0	0	0	0
Prestwick-1082	0	0	0	0	0	1	0	0	0	0	0	0	0	0	0	0	0	0	1	0	0	0	0	0	0	1	0	0	0	1	0	0	1	0	0	1	0	1	1	0	1	0	0	0	1	0	0	0	1
Prestwick-1083	1	1	0	0	0	1	0	1	0	0	0	0	1	0	0	0	0	0	1	0	0	0	0	0	0	1	0	0	0	1	0	1	0	0	0	0	0	0	1	0	0	0	0	1	1	0	0	0	1
Prestwick-1084	1	1	0	0	0	0	0	0	0	0	0	0	0	0	1	0	0	0	0	0	1	0	0	0	0	0	1	1	0	0	0	0	0	0	0	0	0	0	0	1	1	0	0	0	0	0	0	1	0
Prestwick-1085	0	0	0	0	0	0	0	0	0	0	0	0	0	0	0	1	0	0	0	0	1	0	0	0	0	0	0	1	0	1	0	0	1	0	0	0	0	0	0	0	0	0	0	0	0	0	0	0	1
Prestwick-1100	0	1	1	0	0	0	0	0	0	0	0	0	0	0	0	1	0	1	0	0	0	0	0	1	0	0	0	0	0	1	0	0	0	1	0	0	0	0	1	0	0	1	0	0	1	0	1	0	0
Prestwick-1103	0	0	0	0	1	1	1	1	0	0	0	0	0	0	0	0	0	0	0	1	1	1	0	0	0	0	1	0	0	0	0	0	0	1	0	0	0	1	0	0	1	0	0	0	1	0	0	0	0
Prestwick-559	1	1	0	1	0	0	0	0	0	0	0	1	1	1	0	0	1	1	1	0	0	0	0	1	1	0	1	0	1	1	0	1	0	0	1	0	1	0	1	1	1	0	1	0	0	0	0	0	0
Prestwick-642	0	0	0	0	0	0	0	0	0	0	0	0	0	0	0	1	0	0	0	1	0	0	1	0	0	1	0	0	0	1	0	0	0	0	0	0	0	0	0	0	0	0	0	0	0	0	0	0	1
Prestwick-664	0	1	0	0	0	0	0	0	0	0	0	0	0	0	0	0	0	0	0	0	0	0	0	1	0	1	0	0	0	0	0	0	1	0	0	0	0	0	0	0	0	0	0	0	1	0	0	0	0
Prestwick-665	0	0	0	0	0	0	0	0	0	0	0	0	0	1	0	0	0	0	1	0	0	0	0	1	0	0	0	0	0	0	0	1	0	0	1	0	0	0	0	0	1	0	1	0	1	0	1	0	0
Prestwick-674	0	0	1	0	0	0	0	0	1	0	0	0	0	0	0	0	0	0	0	0	0	0	0	1	0	1	0	0	1	0	0	0	0	0	0	0	1	0	1	0	0	0	1	0	0	0	0	0	0
Prestwick-675	0	0	0	0	0	1	0	0	1	0	0	0	0	0	0	0	0	0	1	1	0	1	0	0	0	1	0	0	0	1	1	0	0	1	1	0	0	0	0	0	1	0	0	0	0	0	0	0	0
Prestwick-682	0	0	0	0	0	0	1	1	0	0	0	0	0	0	0	0	0	0	0	0	1	0	0	1	0	0	1	0	1	0	0	0	1	0	0	0	0	1	0	1	0	0	0	0	0	1	0	0	0
Prestwick-685	0	0	0	1	0	0	1	0	0	0	0	1	0	1	1	0	0	0	0	0	0	0	0	1	1	1	0	1	1	0	0	0	1	0	1	0	0	0	1	0	0	0	0	1	0	1	0	1	0
Prestwick-689	0	0	0	0	0	0	0	0	1	0	0	0	0	0	0	0	0	1	0	0	0	0	0	0	0	1	0	0	0	1	0	0	0	1	0	0	0	0	0	0	0	0	0	0	0	0	0	0	1
Prestwick-691	0	0	0	0	0	1	0	1	0	0	1	0	0	0	0	1	0	0	0	1	0	0	1	0	0	1	1	1	1	1	0	0	0	1	0	0	0	1	1	0	0	0	0	0	0	0	0	0	0
Prestwick-692	0	0	0	0	0	1	0	0	0	0	0	0	0	0	0	1	0	0	0	1	0	0	0	0	0	0	1	1	0	1	0	0	1	0	0	0	0	1	0	0	0	0	0	0	0	0	0	0	1
Prestwick-857	0	0	0	0	0	0	0	0	1	0	0	0	0	0	0	0	0	1	0	1	0	0	0	0	0	0	0	1	0	0	0	1	1	1	0	0	0	1	0	0	0	0	0	0	1	0	0	0	0
Prestwick-860	0	1	0	0	0	0	0	0	1	0	0	0	0	0	0	0	0	0	1	0	1	0	0	1	0	0	1	0	0	0	0	0	0	0	1	0	0	0	0	1	0	0	0	0	0	0	0	0	0
Prestwick-864	0	1	0	0	0	0	0	0	1	0	0	0	0	0	0	0	0	1	1	0	0	0	0	0	0	1	0	0	0	0	0	0	0	1	0	0	0	0	1	0	0	0	0	0	0	0	0	0	0
Prestwick-920	0	0	0	0	0	0	0	0	0	0	0	0	0	0	0	1	0	0	0	1	0	0	0	0	0	1	0	1	0	1	0	0	0	1	0	0	0	0	0	0	0	0	0	1	1	0	0	0	0
Prestwick-967	0	0	0	0	1	0	1	0	1	0	0	0	0	0	0	0	0	0	0	0	1	1	0	0	0	0	1	0	0	1	0	0	1	1	0	1	0	0	0	0	1	1	0	0	0	0	0	0	1
Prestwick-972	0	0	0	0	0	0	0	0	0	0	0	0	0	0	0	0	0	0	0	1	1	0	0	0	0	0	0	0	0	0	0	0	1	0	0	0	0	0	1	0	0	0	0	0	1	0	0	0	0
Prestwick-981	0	0	0	0	0	0	0	0	0	0	0	1	0	0	0	0	0	0	0	1	0	0	0	1	0	0	1	0	0	0	0	0	0	0	1	0	0	0	0	0	0	0	0	1	0	1	0	0	1
Prestwick-983	0	0	0	0	0	0	0	0	0	0	0	0	0	0	0	0	0	0	0	1	1	0	1	0	0	0	1	0	1	0	0	0	0	0	0	0	0	0	1	0	0	0	0	0	0	0	1	1	0
Prestwick-984	1	1	0	0	0	1	0	0	0	0	0	0	1	0	1	1	0	0	1	0	1	0	0	1	0	0	1	0	0	1	0	0	0	1	0	0	0	1	0	0	1	0	0	0	0	0	0	0	0
pridinol	0	0	0	0	0	0	0	0	0	0	0	0	0	0	0	1	0	1	1	0	0	0	0	0	0	1	0	0	0	0	0	1	0	1	1	0	0	0	0	0	1	1	0	1	1	0	0	0	1
prilocaine	0	0	0	0	0	0	1	1	1	0	0	0	0	0	0	0	0	0	1	0	0	0	0	0	0	0	0	0	0	1	0	0	0	1	0	0	0	1	0	0	0	0	0	0	0	0	0	0	1
primaquine	1	0	1	0	0	0	1	1	1	0	0	0	0	1	1	0	1	0	0	1	0	0	0	0	0	0	0	0	0	0	1	0	1	0	1	1	0	1	0	0	0	0	0	1	0	1	0	0	0
primidone	0	1	0	0	0	1	0	0	0	0	0	0	0	0	0	0	0	1	1	0	0	0	0	0	0	1	1	0	1	1	0	0	0	0	0	0	0	1	1	0	1	0	0	0	0	0	0	0	1
proadifen	0	1	0	1	0	1	0	0	0	1	0	0	1	0	1	0	0	1	0	0	0	1	0	1	0	0	1	0	0	0	0	1	0	0	0	0	0	0	0	0	1	0	0	1	0	1	1	0	0
probenecid	1	1	0	0	0	0	0	0	0	0	0	0	0	0	1	0	0	1	0	0	1	0	0	1	0	0	1	0	1	0	0	0	0	0	0	0	0	0	0	1	1	0	0	0	0	0	0	0	0
probucol	0	1	0	0	0	0	0	1	0	0	0	0	0	0	0	1	0	0	0	0	0	0	0	0	0	0	1	1	0	0	0	0	0	0	0	0	0	0	1	0	0	1	0	0	0	0	0	0	1
procainamide	1	1	0	0	0	0	0	0	0	0	0	0	0	0	1	1	0	0	1	0	0	0	0	1	0	0	1	0	0	1	0	1	0	0	1	0	0	0	0	0	0	0	0	0	1	0	0	0	0
procaine	1	0	0	0	0	0	0	0	0	0	0	0	0	0	0	0	0	0	0	0	0	0	1	0	0	1	0	1	0	0	0	1	0	0	0	0	0	0	0	0	0	0	0	0	1	0	0	0	0
procarbazine	1	1	0	0	0	0	0	0	0	0	0	1	0	0	1	0	0	0	0	0	1	0	1	0	0	0	1	0	0	1	0	1	0	0	0	1	0	0	1	0	0	0	0	0	0	0	0	0	1
prochlorperazine	0	0	0	1	0	0	1	0	0	1	1	1	1	0	0	0	1	1	1	0	1	1	1	1	1	0	0	0	0	1	1	1	1	1	0	1	1	0	0	1	0	0	1	1	0	1	1	0	0
procyclidine	1	0	0	0	0	0	0	0	0	1	1	0	0	0	0	0	0	0	0	1	1	0	1	0	0	0	0	0	0	0	0	0	0	0	0	1	0	1	0	0	0	1	0	0	0	0	0	0	1
profenamine	0	0	0	0	0	0	0	0	1	1	1	1	0	0	0	0	0	0	0	1	1	0	1	0	0	0	0	1	0	0	1	1	1	1	0	1	0	0	0	0	0	1	1	1	0	1	0	0	0
progesterone	0	1	0	1	0	0	0	0	0	0	0	0	0	1	0	0	0	1	1	0	1	0	0	0	0	0	1	0	0	1	0	1	0	1	1	0	1	0	0	0	0	1	1	1	0	1	1	0	0
proglumide	1	0	0	0	0	0	1	0	1	0	0	0	0	0	0	0	0	0	0	0	1	0	0	0	0	0	0	1	0	0	0	1	0	1	0	0	0	0	0	0	0	0	0	0	1	0	0	0	0
proguanil	1	1	0	1	0	1	0	0	0	0	0	1	1	0	1	0	0	1	1	0	0	0	0	0	0	0	1	0	0	1	0	0	0	0	0	0	0	0	0	0	0	0	0	0	0	0	0	0	0
promazine	1	1	1	1	0	0	0	0	0	1	1	1	1	0	0	0	1	1	1	0	0	0	1	1	1	1	1	0	0	0	1	1	1	1	0	1	1	0	0	0	0	1	1	1	1	1	1	0	0
promethazine	1	0	1	1	0	0	0	1	0	0	1	0	1	0	0	0	0	0	0	0	0	0	0	1	1	0	0	0	1	0	0	0	0	0	0	0	0	1	1	1	0	0	1	1	0	1	0	0	1
pronetalol	1	1	0	0	0	1	0	1	1	0	0	1	0	0	1	1	0	0	1	0	0	0	0	0	0	0	1	0	0	0	0	0	0	0	0	0	0	0	0	1	1	1	0	0	0	0	0	0	0
propafenone	1	1	1	1	0	0	0	0	1	0	0	1	1	1	0	1	1	1	1	0	0	0	1	1	1	1	0	0	0	1	1	1	0	0	0	0	1	1	1	1	0	0	1	1	0	1	0	0	0
propantheline bromide	1	0	0	0	0	0	1	0	0	0	0	0	0	0	0	0	0	0	0	1	0	1	1	1	1	0	0	1	0	0	0	1	0	1	0	0	0	0	1	0	0	0	0	1	1	1	0	0	0
propidium iodide	0	0	0	0	0	1	1	0	0	0	0	0	0	0	0	0	0	1	1	0	0	0	0	0	0	0	1	0	1	0	0	0	1	0	0	0	0	0	1	0	1	0	0	0	0	0	0	0	1
propofol	0	0	0	0	0	0	1	0	1	1	0	0	0	0	1	0	0	0	0	0	0	1	0	1	0	0	0	0	0	0	1	1	0	0	1	0	0	0	0	0	0	0	0	0	0	1	1	0	0
propoxycaine	0	0	0	0	0	0	0	1	0	0	0	0	0	0	0	0	0	0	0	0	0	0	0	0	0	0	0	0	1	0	0	0	0	0	0	0	0	1	0	0	1	0	1	0	0	0	0	0	0
propranolol	1	0	0	1	0	0	0	0	0	0	0	1	0	0	0	0	0	1	0	0	0	0	1	0	1	0	0	1	0	0	0	1	0	0	0	0	0	0	0	0	0	1	0	0	0	1	0	0	0
propylthiouracil	0	0	0	0	0	0	0	0	0	0	0	0	0	1	1	0	0	1	0	0	0	0	1	1	0	1	0	1	0	0	0	1	0	1	1	0	0	0	0	0	0	0	0	0	1	1	0	0	0
proscillaridin	0	0	0	0	0	0	0	0	0	0	0	1	0	0	0	1	1	0	0	0	0	1	0	0	1	0	1	0	1	0	1	0	0	1	0	0	0	0	1	1	0	0	0	1	1	1	0	0	0
protoveratrine A	0	1	0	0	0	0	0	1	0	0	0	0	1	0	0	0	0	0	1	0	0	0	0	0	0	1	0	1	0	1	0	0	0	0	0	0	0	0	1	0	1	0	1	0	1	0	0	0	0
protriptyline	0	1	1	1	0	0	0	0	0	1	1	1	1	0	0	0	1	1	1	0	0	0	1	0	0	1	0	0	0	1	1	1	1	0	0	1	1	0	1	0	0	0	0	1	0	1	1	0	0
proxymetacaine	0	1	0	1	0	0	0	1	0	0	0	1	1	0	0	0	0	0	1	0	0	0	1	0	0	1	0	0	0	1	0	1	1	0	0	0	0	0	0	1	1	0	0	1	1	0	0	0	0
proxyphylline	1	0	0	0	0	0	0	0	0	0	0	0	0	0	0	1	0	0	0	0	0	0	1	0	0	0	1	0	0	1	0	0	0	0	0	0	0	0	0	1	0	0	1	0	1	0	0	1	0
pseudopelletierine	1	1	1	0	0	0	1	1	0	0	0	1	0	0	1	0	1	0	0	0	0	0	0	0	1	0	0	0	1	0	0	1	0	1	1	0	0	0	0	0	0	0	0	1	0	0	0	1	0
puromycin	1	1	1	0	1	0	0	0	0	1	0	1	1	0	0	0	1	1	1	0	0	0	1	1	1	1	0	1	0	1	1	1	1	0	1	0	0	0	1	1	0	0	0	0	0	0	1	1	0
pyrantel	1	1	0	0	0	1	0	1	1	0	0	0	0	0	1	0	0	0	0	0	0	0	0	0	0	0	1	0	0	1	0	0	0	0	0	0	0	0	0	1	1	0	0	0	0	0	0	0	0
pyrazinamide	1	1	0	0	0	0	0	1	0	0	0	0	1	0	0	1	0	0	1	0	0	0	0	1	0	1	1	0	0	0	0	0	0	0	0	0	0	0	0	1	1	0	1	0	1	0	0	0	0
pyridoxine	1	0	0	0	0	0	1	1	0	0	0	0	0	0	0	0	0	0	0	0	0	0	0	0	0	0	0	0	0	0	0	0	0	0	0	0	0	0	1	0	0	0	0	0	0	0	0	0	0
pyrimethamine	0	1	1	0	0	1	0	1	0	0	1	1	1	0	1	0	0	1	1	0	0	0	0	0	0	0	0	1	0	1	0	1	0	1	0	0	1	0	1	0	0	0	0	0	0	0	1	0	1
pyrithyldione	0	0	0	0	0	0	1	0	0	0	0	0	0	0	0	0	0	0	0	1	0	0	0	0	0	0	1	1	0	0	0	0	0	0	0	0	0	0	0	0	0	0	0	0	0	0	0	0	0
pyrvinium	1	1	1	1	0	0	0	0	0	1	0	1	1	0	1	0	1	0	0	0	0	0	1	0	1	0	0	0	0	1	1	0	0	0	0	0	0	0	0	1	0	0	1	1	0	1	1	1	0
quercetin	0	0	1	0	0	0	1	1	1	1	1	0	0	0	0	0	0	0	0	1	1	1	0	0	1	0	0	0	0	0	0	0	1	1	0	1	0	1	0	0	0	0	1	0	0	0	1	1	0
quinethazone	0	1	0	0	0	0	0	0	0	0	0	0	0	0	0	1	0	0	1	0	0	0	0	1	0	0	0	0	1	0	0	0	0	1	0	0	0	0	1	0	0	0	0	0	0	0	0	0	0
quinidine	0	0	0	0	0	0	1	0	0	0	0	0	0	0	0	0	0	0	1	0	0	0	0	0	0	0	0	1	1	1	0	0	1	0	1	1	0	1	1	0	0	0	0	1	0	1	0	0	1
quinisocaine	0	0	1	0	0	0	1	0	0	1	1	1	1	0	1	0	0	0	1	0	1	1	0	0	0	0	0	1	0	1	1	1	1	0	0	1	0	0	0	0	1	0	0	0	0	1	1	0	1
quinostatin	1	0	0	0	0	0	0	0	0	0	0	1	0	0	0	0	1	0	0	1	1	1	1	1	1	0	0	1	0	0	1	0	0	0	0	0	1	1	0	1	0	0	1	0	0	1	0	0	0
quinpirole	0	0	0	0	0	0	1	1	1	0	1	0	0	0	0	0	0	0	0	1	1	1	0	0	0	0	0	1	0	0	0	0	0	0	0	0	0	0	0	0	0	1	0	0	0	0	1	1	0
quipazine	0	0	0	0	0	0	0	1	0	0	0	0	0	0	0	0	0	0	0	1	0	0	0	0	0	0	1	0	1	0	0	0	1	0	0	0	0	0	0	0	0	0	1	0	0	0	0	0	0
racecadotril	1	1	0	0	0	1	0	1	0	0	1	0	1	0	0	0	0	0	1	0	0	0	0	0	0	1	1	0	1	1	0	0	1	0	1	0	0	1	0	1	1	0	0	1	0	0	0	0	0
raloxifene	0	0	0	1	0	1	1	1	1	0	1	1	0	0	0	0	0	0	0	0	1	1	0	0	1	0	0	0	0	0	0	0	0	0	0	1	0	0	0	0	0	0	0	0	0	1	1	1	0
ramifenazone	0	0	0	0	0	0	0	0	1	0	0	0	0	0	0	0	0	1	0	1	0	0	0	0	0	1	0	0	0	0	0	0	0	0	0	0	0	0	1	0	1	0	0	0	0	0	0	0	1
ramipril	0	0	0	0	0	0	0	0	1	0	0	0	0	1	0	0	0	0	0	0	1	0	0	0	0	0	0	0	0	0	0	0	1	1	1	0	0	1	0	0	0	0	1	0	0	0	0	0	0
ranitidine	1	1	0	0	0	1	0	1	0	0	0	0	0	0	0	0	0	0	0	0	0	0	0	0	0	1	1	1	0	0	0	1	0	0	0	0	0	0	0	0	0	0	0	0	0	0	0	0	0
R-atenolol	0	0	0	0	0	0	0	1	0	0	0	0	0	0	0	0	0	0	0	1	0	0	0	0	0	0	0	0	0	0	0	0	1	0	0	0	0	0	0	0	0	0	0	1	1	0	0	0	0
raubasine	0	0	0	1	0	0	1	1	1	0	1	1	0	0	0	0	1	0	0	0	0	0	0	0	0	0	1	1	0	0	0	0	0	0	0	0	0	1	1	0	0	0	0	0	0	0	0	0	0
remoxipride	1	0	0	0	0	0	0	0	0	0	0	0	0	0	0	1	1	0	0	0	0	0	1	0	1	0	0	1	1	0	0	0	0	0	0	0	0	1	1	1	0	0	1	0	0	0	0	0	0
repaglinide	0	1	1	0	0	0	0	0	0	0	0	0	0	1	0	0	0	0	1	0	0	0	0	1	0	1	0	0	0	1	0	1	0	0	1	0	1	0	0	0	0	0	1	0	1	0	0	0	0
rescinnamine	1	0	0	1	0	0	0	0	0	1	0	1	0	0	1	1	0	0	0	0	0	1	0	1	1	0	1	0	0	0	1	0	0	0	0	0	1	1	0	0	0	0	0	0	0	0	1	1	0
reserpine	0	0	1	1	0	0	0	0	0	1	0	1	0	1	1	0	0	1	0	0	0	1	0	1	1	0	0	0	1	0	1	1	0	0	0	0	1	1	0	0	0	0	0	0	0	0	1	0	1
resveratrol	0	0	1	1	0	0	1	0	0	1	1	1	1	1	1	0	0	1	0	0	0	1	0	1	1	0	1	1	1	0	1	0	1	0	0	0	1	1	0	0	0	1	0	0	0	1	0	1	0
retrorsine	1	1	0	0	0	0	0	0	1	0	0	0	1	0	0	1	0	0	1	0	0	0	0	1	0	0	1	1	0	1	0	0	0	0	0	0	0	0	0	0	1	0	0	0	1	0	0	0	0
ribavirin	0	0	0	0	1	1	1	1	0	0	1	0	0	0	0	0	0	0	0	1	1	0	0	0	0	0	1	0	0	0	0	0	1	0	0	0	0	0	0	0	0	1	0	0	1	1	0	0	0
riboflavin	1	0	0	0	0	0	0	0	0	0	0	0	0	0	0	0	0	0	0	0	0	0	0	1	0	1	0	0	0	0	0	1	0	0	0	0	0	0	0	0	0	0	0	0	1	0	0	0	1
ribostamycin	0	0	0	0	0	0	0	0	1	0	0	0	0	0	0	0	0	1	0	0	0	0	0	0	0	0	1	1	0	0	0	1	0	1	0	0	0	0	0	0	1	1	0	0	0	0	0	0	0
ricinine	0	1	0	0	0	0	0	0	0	0	0	0	0	0	0	0	0	0	0	0	1	0	0	0	0	0	1	1	0	0	0	0	0	1	0	0	0	0	0	0	0	0	0	0	0	0	0	0	0
rifabutin	1	1	0	0	0	1	0	0	0	0	0	1	1	0	1	0	0	0	1	0	0	0	0	1	1	1	1	1	0	0	1	0	0	0	0	0	1	0	1	0	1	0	0	1	0	0	1	1	0
rifampicin	0	0	0	0	0	1	0	0	0	0	0	0	0	0	0	0	0	0	0	0	0	0	0	0	0	0	1	0	1	1	0	0	1	0	0	0	0	0	0	0	0	0	0	0	1	0	0	0	1
rilmenidine	1	0	0	0	1	0	1	0	0	0	0	0	0	0	0	0	0	1	0	0	0	0	1	0	0	1	0	0	0	0	0	1	1	0	0	1	0	1	0	0	0	0	0	0	1	0	0	0	1
riluzole	0	0	0	0	0	0	0	0	0	0	0	0	0	0	1	1	0	0	0	0	1	1	0	1	1	0	1	0	0	1	0	0	0	1	0	0	0	1	0	0	1	0	0	0	0	0	0	1	1
rimexolone	1	0	0	0	0	0	0	0	0	0	0	0	0	1	1	1	1	0	0	0	0	0	1	0	0	0	0	1	1	0	0	0	0	1	0	0	1	0	1	1	0	0	1	1	0	1	0	0	0
risperidone	0	0	0	0	0	0	0	0	1	0	0	0	0	0	0	0	0	0	0	0	0	0	0	0	0	0	0	0	0	0	0	0	0	1	0	0	0	1	0	0	0	0	1	0	1	0	0	0	1
ritodrine	0	0	0	0	0	0	0	0	0	0	0	0	0	0	0	0	0	0	0	0	0	0	0	0	0	0	0	0	0	1	0	1	0	0	1	0	0	1	1	0	1	0	0	1	0	0	1	0	1
rofecoxib	0	1	1	0	0	0	0	0	0	0	0	1	0	1	1	1	1	1	1	0	0	0	0	1	1	1	1	1	1	1	1	1	1	1	1	0	1	0	1	1	1	0	1	1	0	1	0	0	0
rolipram	0	0	0	0	0	0	0	0	1	0	0	0	0	0	1	1	0	0	0	1	0	0	1	0	0	0	0	1	0	1	0	0	0	1	0	0	0	0	1	0	0	0	0	0	0	0	1	0	1
rolitetracycline	1	0	0	0	0	0	0	1	1	0	0	0	0	0	1	0	0	0	0	0	0	0	1	0	0	1	0	0	0	1	0	0	0	0	0	1	0	0	0	1	0	0	0	1	0	0	0	1	1
ronidazole	1	0	0	0	0	0	0	0	1	0	0	0	0	0	1	1	0	0	0	0	0	0	0	0	0	0	0	1	0	0	0	0	0	1	0	0	0	0	0	1	0	0	0	0	1	0	0	0	0
rosiglitazone	0	0	0	1	1	1	0	1	0	0	1	0	0	0	0	0	0	0	0	0	1	0	0	0	0	0	0	0	0	1	0	0	0	1	0	0	1	0	0	1	1	1	0	0	1	0	0	0	0
rotenone	0	0	0	0	0	0	0	0	0	1	0	1	1	0	0	0	1	0	0	1	1	0	1	0	0	0	0	0	0	0	1	1	0	1	0	0	0	0	0	0	0	0	1	0	0	1	0	0	0
rottlerin	0	0	0	0	0	0	1	0	1	1	0	0	1	0	0	0	0	0	0	1	1	1	0	1	0	0	0	1	0	0	1	0	0	0	0	1	1	0	0	0	0	0	1	0	0	1	1	0	0
roxarsone	1	1	0	0	0	0	0	0	0	0	0	0	1	0	1	0	0	0	0	0	0	0	0	0	0	0	0	1	0	1	0	0	0	0	0	0	0	1	0	0	0	1	1	0	1	0	0	1	1
roxithromycin	1	0	0	0	0	0	0	0	1	0	0	0	0	0	1	1	0	0	0	1	1	0	1	1	0	0	0	1	1	0	0	0	0	0	0	0	0	0	0	1	0	0	0	0	0	0	0	0	0
salbutamol	0	0	0	0	0	0	0	0	0	0	0	0	0	0	0	0	0	0	0	0	0	0	1	0	0	0	0	0	0	1	0	1	0	1	0	0	0	0	1	0	0	0	0	0	0	0	1	0	1
salsolidin	1	1	0	0	0	0	0	0	1	0	0	0	1	0	1	1	0	0	1	0	0	0	0	1	0	0	1	0	0	1	0	0	0	1	0	0	0	0	0	0	1	0	0	0	0	0	0	0	1
salsolinol	1	1	0	0	0	0	0	0	0	0	0	0	0	0	0	1	0	1	0	1	0	0	1	0	1	0	0	0	0	0	0	0	0	0	0	0	0	1	0	0	0	0	0	0	1	0	0	0	0
sanguinarine	1	0	0	0	1	0	0	0	0	0	0	0	1	1	0	0	1	1	1	0	0	1	0	1	0	1	0	1	1	0	1	1	0	0	1	1	1	1	1	1	0	0	1	1	0	1	0	0	0
santonin	1	1	0	0	0	0	0	0	0	0	0	0	0	0	0	0	1	0	1	0	0	0	1	0	0	0	0	0	1	1	0	0	1	0	0	0	0	0	1	0	0	0	1	1	1	0	0	0	1
saquinavir	1	0	0	1	0	0	0	0	1	0	1	0	0	0	0	1	0	1	0	1	0	0	1	0	0	0	0	1	0	0	0	1	0	0	0	0	0	0	0	0	0	0	0	0	0	0	0	0	0
SB-202190	1	0	0	0	0	0	0	0	0	0	0	0	0	1	1	0	0	1	0	0	0	0	0	0	0	0	0	0	1	0	0	1	0	0	0	0	0	0	1	0	0	0	1	0	0	0	0	0	0
SB-203580	1	1	0	0	0	0	0	1	0	0	0	0	0	0	0	0	0	0	1	0	0	0	0	0	0	0	0	1	0	0	0	0	1	0	0	0	0	0	1	0	0	0	0	0	0	0	0	0	0
SC-19220	0	0	0	0	0	0	0	0	0	0	0	0	0	1	0	0	0	1	0	0	0	0	0	1	0	0	0	0	1	0	0	0	0	1	1	0	0	0	1	0	0	0	0	0	0	0	0	0	0
SC-560	1	1	0	0	0	1	0	1	0	0	0	0	0	0	0	0	0	0	0	1	0	0	0	0	0	0	0	1	0	1	0	0	1	0	0	0	0	0	1	0	0	0	0	1	0	1	0	0	0
SC-58125	1	1	1	0	0	0	0	0	1	0	0	1	0	1	1	1	1	1	1	1	0	0	1	1	1	1	1	0	1	1	1	1	1	0	1	0	1	0	1	1	1	0	1	1	0	1	0	0	0
scopolamine	0	0	0	0	0	0	0	1	1	0	0	0	0	1	1	0	0	0	0	1	1	1	0	1	0	0	0	1	1	0	0	0	1	0	1	0	0	1	0	1	0	0	0	0	0	1	0	0	0
scopolamine N-oxide	0	1	0	0	0	0	0	1	0	0	0	0	0	0	0	1	0	0	1	0	0	0	0	0	0	1	0	0	0	1	0	0	0	0	0	0	0	0	0	0	0	0	0	1	1	0	0	0	0
scopoletin	0	0	0	0	0	0	0	1	0	0	0	0	0	0	0	0	0	0	0	0	0	0	0	0	0	0	0	0	0	0	0	0	0	0	0	0	0	0	0	0	1	1	0	0	1	0	0	0	0
scoulerine	0	0	0	0	1	0	1	0	1	1	0	0	1	0	0	0	0	0	0	0	1	0	1	1	0	0	0	0	0	0	1	0	0	1	0	0	0	1	0	0	0	0	0	0	0	1	1	0	0
scriptaid	1	1	1	1	1	1	0	0	0	0	0	1	0	1	0	0	1	0	1	0	0	1	0	1	1	0	1	1	0	0	0	0	1	0	0	0	1	0	1	0	0	0	0	1	0	0	1	1	0
securinine	0	0	0	0	1	0	0	0	1	1	0	0	1	0	0	0	1	0	1	0	0	0	0	0	1	1	0	0	0	1	1	0	0	0	1	1	0	0	0	0	1	0	0	1	0	1	0	1	1
selegiline	1	0	0	0	0	1	0	1	0	0	0	0	0	0	1	0	0	0	0	0	1	0	0	1	0	0	1	1	0	0	0	0	0	1	0	0	0	1	0	0	0	0	0	0	1	0	0	0	0
semustine	1	0	1	0	1	0	0	0	0	1	1	0	1	0	1	1	0	0	1	1	0	0	0	0	1	0	0	0	0	1	1	0	0	0	0	1	0	0	0	0	0	0	0	0	0	0	1	1	0
seneciphylline	1	0	1	0	0	0	0	0	0	0	0	0	0	0	0	1	0	0	0	0	0	0	1	1	1	1	0	1	1	1	0	0	0	0	0	0	0	1	1	1	1	0	0	0	0	0	0	1	1
serotonin	0	0	0	0	0	0	0	0	0	0	0	0	0	1	0	0	0	0	0	0	0	0	1	0	0	1	0	0	0	1	0	0	1	0	0	0	0	0	0	1	0	1	1	1	1	0	0	0	1
sertaconazole	0	1	0	1	0	0	0	0	0	1	1	0	1	0	0	0	0	0	0	1	0	0	1	0	0	0	0	0	0	0	0	1	0	0	0	0	1	0	0	0	0	0	1	0	1	0	1	0	0
simvastatin	0	0	0	1	0	0	0	0	0	0	1	0	0	0	0	1	0	0	0	0	0	1	0	1	0	0	0	0	1	0	0	0	0	1	0	1	0	0	0	1	0	0	1	0	0	0	1	0	1
sirolimus	0	0	0	0	0	0	1	1	0	0	0	1	0	0	0	1	1	0	0	0	1	1	0	1	1	0	0	0	0	0	1	0	1	0	0	0	1	1	0	0	0	0	1	0	0	0	1	0	0
sisomicin	0	0	0	0	0	0	0	0	0	0	0	0	0	0	0	1	0	0	0	1	0	0	1	0	0	0	1	1	1	1	0	0	1	0	1	0	0	0	1	0	0	0	0	0	0	0	0	0	0
sitosterol	0	0	0	0	0	0	0	0	0	0	0	0	0	0	0	1	0	0	0	0	0	0	0	0	0	0	0	0	0	1	0	0	0	0	0	0	0	0	1	0	1	0	0	0	0	0	0	0	1
skimmianine	0	0	0	0	0	0	0	0	1	0	0	1	0	1	0	0	1	0	1	1	0	1	1	0	0	0	1	1	0	0	0	1	1	0	1	0	1	0	0	1	1	0	0	0	0	0	0	0	0
sodium phenylbutyrate	0	0	0	0	1	0	1	1	0	0	1	1	0	0	0	1	0	0	1	0	1	0	0	0	0	0	0	0	0	0	0	1	0	1	0	0	1	0	1	1	0	0	0	0	0	0	0	1	0
solanine	0	1	0	0	0	0	0	1	0	0	0	0	0	0	1	0	1	0	0	0	0	0	1	1	0	1	1	1	1	1	0	1	0	0	0	0	1	0	1	1	1	0	1	1	0	0	1	0	0
solasodine	0	1	0	1	0	0	1	1	0	0	0	0	0	1	1	0	1	0	0	0	1	0	0	1	0	0	1	0	0	0	0	1	1	1	1	0	1	0	0	1	0	0	1	1	1	0	0	0	0
sotalol	0	0	0	0	0	0	1	1	0	0	0	0	0	0	0	0	0	0	1	0	0	0	0	0	0	0	0	0	0	0	0	0	0	0	0	0	0	1	0	0	1	0	0	0	0	0	0	0	1
spaglumic acid	0	0	0	0	0	0	0	0	1	0	0	0	0	1	0	0	0	1	0	0	0	0	0	0	0	0	0	1	0	0	0	0	0	1	0	0	0	1	0	0	1	0	1	0	1	0	0	0	0
sparteine	0	0	0	0	0	0	0	0	1	0	0	0	0	0	0	1	0	1	0	1	0	0	0	1	0	1	0	1	0	0	0	1	0	1	0	0	0	0	0	0	0	0	0	0	1	0	0	0	0
spectinomycin	1	0	0	0	0	0	1	0	0	0	0	0	0	0	1	0	0	0	0	0	1	0	0	1	0	0	1	0	0	1	0	0	0	0	0	0	0	1	0	1	1	1	0	0	0	0	0	0	0
spiperone	0	1	1	1	0	0	0	0	0	1	1	0	1	0	0	1	1	0	1	1	1	1	1	0	0	1	0	0	1	1	1	1	0	0	1	0	0	0	0	0	0	0	0	1	0	1	1	0	0
spiradoline	0	1	0	0	1	1	1	1	0	0	0	0	0	0	0	0	0	0	1	1	0	1	0	0	0	0	0	0	0	0	0	0	1	0	0	0	0	0	0	0	1	0	0	1	0	0	0	0	0
spiramycin	0	0	0	1	0	0	0	0	1	0	0	0	0	0	0	0	0	0	0	0	0	0	0	0	0	0	1	0	0	0	0	0	1	0	0	0	0	0	0	0	1	0	0	0	0	0	0	0	1
spironolactone	0	0	0	1	0	0	0	0	0	0	0	0	0	0	0	0	0	1	0	0	0	1	0	0	1	0	0	0	0	1	0	1	0	0	0	0	1	1	0	0	0	0	0	0	0	1	0	1	1
splitomicin	0	0	0	0	0	1	1	0	0	0	0	0	1	0	0	0	0	1	0	0	0	1	0	0	0	0	1	0	1	0	0	0	0	0	0	1	0	1	1	0	1	0	0	0	0	0	0	1	0
S-propranolol	1	1	0	1	0	1	0	1	0	0	0	1	1	0	0	0	1	1	1	0	0	0	1	0	0	1	1	0	0	1	0	1	0	0	0	0	0	0	1	0	0	0	0	1	1	0	0	0	1
SR-95531	1	1	0	0	0	0	0	0	1	0	0	0	1	0	1	1	0	1	1	0	0	0	0	0	0	1	0	0	0	1	0	1	0	0	0	0	0	0	0	0	1	0	1	0	1	0	0	0	0
SR-95639A	0	0	0	0	0	0	0	0	0	0	0	0	0	0	0	0	0	0	0	0	0	0	1	0	0	0	0	0	1	0	0	0	1	0	0	0	0	0	1	0	0	0	0	1	0	0	0	0	0
stachydrine	0	0	0	0	0	1	1	0	1	0	0	0	0	0	0	0	0	0	0	0	1	0	0	1	0	0	1	1	0	0	0	1	0	1	0	0	0	0	0	0	0	1	0	0	0	0	0	0	0
staurosporine	0	0	1	1	0	1	1	0	1	0	0	1	0	1	1	0	1	0	0	0	1	1	0	1	1	0	0	0	0	0	1	0	1	0	0	0	1	0	0	1	1	0	1	0	0	0	1	0	0
STOCK1N-28457	1	1	0	0	0	1	0	1	0	0	0	0	0	0	1	0	0	0	1	1	0	0	0	0	0	1	0	1	0	0	0	0	0	0	0	0	0	0	1	0	0	0	0	1	1	0	0	0	0
STOCK1N-35215	1	0	1	0	1	0	0	0	0	1	0	0	1	0	1	0	1	0	0	0	0	0	1	1	1	1	0	0	1	0	1	0	0	0	1	1	0	0	1	1	1	0	1	1	0	1	1	0	0
STOCK1N-35696	1	1	1	0	1	0	0	0	0	1	0	0	1	0	0	0	1	0	1	0	0	0	1	0	0	1	0	0	0	1	1	0	0	0	0	0	0	0	0	0	0	0	0	1	0	1	0	0	0
STOCK1N-35874	0	0	0	0	1	0	1	0	0	1	0	0	1	0	0	0	0	0	0	0	0	0	1	0	0	0	0	0	0	0	0	0	1	1	1	0	0	0	0	0	0	0	0	1	0	1	0	0	0
streptomycin	0	0	0	0	1	1	1	1	0	0	0	0	0	0	0	0	0	1	1	0	0	0	0	0	0	1	0	0	0	0	0	0	1	0	0	0	0	0	0	0	1	0	0	0	0	0	0	0	1
streptozocin	0	0	0	0	1	1	1	1	0	0	0	0	0	0	0	0	0	0	0	0	0	0	0	0	0	1	0	0	0	0	0	0	1	0	0	0	0	1	1	0	0	1	0	0	0	0	1	0	1
strophanthidin	0	0	0	0	0	0	0	0	0	0	0	1	0	0	0	0	1	0	0	0	0	1	0	0	1	0	0	0	1	0	1	0	0	1	0	0	0	0	0	1	0	0	0	1	1	1	1	0	0
succinylsulfathiazole	0	0	0	0	0	0	0	0	0	0	0	0	0	0	1	0	0	0	0	1	1	0	0	0	0	0	0	1	1	0	0	0	1	0	0	0	0	1	0	0	0	0	0	0	0	1	0	0	0
sulconazole	1	1	0	1	0	0	0	0	1	1	1	1	1	1	1	1	0	0	1	0	0	1	0	1	0	0	0	0	0	0	1	0	0	0	1	1	0	0	0	1	0	0	1	0	0	1	1	0	0
sulfabenzamide	0	0	0	0	0	1	1	1	0	0	0	0	0	0	0	0	0	0	0	0	0	0	0	1	0	0	0	1	0	0	0	1	0	1	0	0	0	1	1	0	1	0	0	0	1	0	0	0	0
sulfacetamide	0	0	0	0	0	0	0	0	0	0	0	0	0	0	0	0	0	0	0	0	0	0	0	0	0	1	0	0	0	1	0	0	0	0	0	0	0	1	1	0	0	0	0	0	0	0	0	0	0
sulfachlorpyridazine	1	0	0	0	0	0	0	1	0	0	0	0	0	0	0	0	0	0	0	0	0	0	1	0	0	1	1	0	0	1	0	0	0	0	0	0	0	0	1	0	1	0	1	0	1	0	0	0	0
sulfadiazine	0	1	0	0	0	0	0	0	0	0	0	0	1	0	0	0	0	0	1	0	0	0	0	0	0	1	1	0	1	1	0	0	0	0	0	0	0	0	0	1	1	0	0	0	0	0	0	0	0
sulfadimethoxine	0	0	0	0	0	1	1	1	0	0	0	0	0	0	0	0	0	0	0	1	1	1	0	0	0	0	0	0	1	0	0	0	1	1	0	0	0	1	0	1	1	0	0	0	0	0	0	0	1
sulfadimidine	1	0	0	0	0	0	0	1	0	0	0	1	0	0	0	1	0	0	0	0	0	0	1	0	0	1	0	0	1	1	0	0	0	0	0	0	0	0	1	0	0	0	0	0	0	0	0	0	0
sulfadoxine	1	1	0	0	0	1	0	1	1	0	0	0	0	0	1	0	0	1	0	0	0	0	0	0	0	0	0	0	0	0	0	0	0	0	0	0	0	1	0	0	0	0	0	0	0	0	0	0	0
sulfafurazole	1	1	0	0	0	0	0	0	0	0	0	0	0	0	0	0	0	0	0	0	0	0	1	1	1	0	0	0	0	0	0	1	0	0	0	0	0	0	0	0	0	0	1	0	1	0	0	0	0
sulfaguanidine	0	0	0	0	1	1	1	1	0	0	0	0	0	0	0	0	0	0	1	0	1	1	0	0	0	0	0	0	0	0	0	0	1	0	0	0	0	0	0	0	1	0	0	0	1	0	0	0	0
sulfamerazine	0	0	0	0	0	0	0	0	0	0	0	0	0	0	0	0	0	0	0	1	0	0	0	0	0	1	0	0	1	0	0	0	0	1	0	0	0	0	1	0	0	0	1	0	1	0	0	0	0
sulfamethizole	0	0	0	0	0	0	0	0	0	0	0	0	0	0	1	1	0	0	0	1	0	0	0	0	0	0	0	1	0	0	0	0	0	0	0	0	0	0	0	0	0	0	0	0	0	0	0	0	1
sulfamethoxazole	0	0	0	0	0	0	0	0	1	0	0	0	0	0	1	0	0	0	0	0	0	0	0	0	0	0	0	0	0	0	0	0	0	0	0	0	0	1	0	0	1	0	0	0	0	0	0	1	1
sulfamethoxypyridazine	1	0	0	0	0	0	0	0	0	0	0	0	0	1	1	0	0	1	0	1	0	0	0	1	0	0	0	1	0	0	0	1	0	0	0	0	0	0	0	0	0	0	0	0	0	0	0	0	0
sulfametoxydiazine	1	1	0	0	0	0	0	1	0	0	0	0	0	0	1	1	0	0	0	0	0	0	0	1	0	0	0	1	0	0	0	1	0	0	0	0	0	0	0	0	0	0	0	0	1	0	0	0	0
sulfamonomethoxine	1	0	0	0	0	1	1	1	0	0	0	0	0	0	1	0	0	0	0	1	1	0	0	0	0	0	0	1	0	0	0	0	0	1	0	0	0	0	0	0	0	1	0	0	0	0	0	0	0
sulfanilamide	0	0	0	0	0	0	0	0	1	0	0	0	0	0	0	0	0	1	0	0	0	0	0	1	0	1	0	0	0	0	0	1	0	0	0	0	0	0	0	0	0	1	0	0	1	0	0	0	0
sulfaphenazole	0	0	0	0	0	0	0	0	1	0	0	0	0	0	1	0	0	0	0	0	0	0	0	0	0	0	1	1	0	1	0	0	0	0	0	0	0	1	0	1	1	0	0	0	0	0	0	0	1
sulfapyridine	1	1	0	0	0	0	0	0	0	0	0	1	0	0	1	1	0	0	0	1	0	0	1	0	1	0	1	0	1	0	0	0	0	0	0	0	0	0	1	1	0	1	0	0	0	0	0	0	0
sulfaquinoxaline	0	0	0	0	0	1	0	0	0	0	0	0	0	0	0	0	0	0	0	0	0	0	0	0	0	0	0	0	0	0	0	0	0	0	0	0	0	1	0	0	1	0	0	0	0	0	0	0	1
sulfasalazine	0	0	0	0	0	0	0	0	0	0	0	0	0	0	0	0	0	0	0	0	0	0	0	1	0	0	0	0	0	1	0	0	0	0	0	0	0	1	1	0	1	0	0	0	0	0	0	0	1
sulfathiazole	1	1	0	0	0	1	0	1	0	0	0	0	1	0	0	1	0	0	1	0	0	0	0	0	0	0	1	0	0	1	0	1	0	0	0	0	0	0	0	1	1	0	0	0	0	0	0	0	0
sulfinpyrazone	0	0	0	0	0	0	0	0	1	0	0	0	0	0	0	1	0	0	0	0	1	0	0	1	0	0	0	0	0	0	0	0	0	0	0	0	0	0	0	0	0	0	0	0	0	0	0	0	0
sulindac	0	0	0	0	1	0	0	0	0	0	0	0	0	0	0	0	0	0	0	0	0	1	0	0	0	1	0	0	0	0	0	1	1	0	0	1	0	0	0	0	0	0	0	0	0	0	0	0	0
sulindac sulfide	0	0	0	1	1	1	1	1	0	1	1	0	0	0	0	0	0	1	0	0	1	1	0	0	0	1	0	0	0	0	0	0	1	1	0	1	0	1	0	0	1	0	0	0	0	0	1	0	0
sulmazole	0	1	0	0	0	1	0	1	0	0	0	0	1	0	0	1	0	0	1	0	0	0	0	1	0	0	1	1	0	1	0	0	0	0	0	0	0	0	0	0	1	0	0	0	0	0	0	0	0
suloctidil	0	0	0	1	0	0	1	0	0	1	1	1	0	0	0	0	1	0	1	1	0	1	1	1	1	0	0	0	1	0	1	0	1	0	1	1	0	0	0	1	0	0	0	1	0	1	1	0	0
sulpiride	1	0	0	0	0	1	0	0	0	0	0	0	0	0	0	0	0	0	0	0	1	0	1	0	0	0	0	1	0	0	0	1	0	0	0	0	0	0	1	0	0	0	0	0	0	0	0	0	0
suprofen	0	1	0	0	0	1	0	1	0	0	0	0	1	0	0	1	0	0	0	1	0	0	0	0	0	1	0	0	0	1	0	0	0	0	0	0	0	0	0	1	0	1	1	0	1	0	0	0	1
suramin sodium	1	0	0	0	0	0	0	0	0	0	0	0	0	1	1	0	0	0	0	0	0	0	1	1	0	1	0	0	1	0	0	0	0	0	1	0	0	0	1	0	0	0	0	0	1	0	0	0	0
suxibuzone	0	0	0	0	0	1	0	0	1	0	0	0	0	0	0	1	0	0	0	0	0	0	0	0	0	0	1	1	0	1	0	0	0	1	0	0	0	0	0	0	0	0	0	0	0	0	0	0	0
syrosingopine	1	0	0	1	0	0	0	0	0	1	0	1	0	0	0	1	1	0	0	1	0	1	0	0	1	0	0	1	0	0	1	0	0	0	0	0	1	1	0	1	0	0	0	0	0	0	1	0	0
tacrine	0	0	0	0	0	0	0	0	1	0	0	0	0	0	0	0	0	0	0	1	0	0	0	0	0	0	0	0	0	0	0	0	1	0	0	0	0	0	0	0	0	0	0	1	0	1	0	0	0
tacrolimus	0	0	0	1	1	1	0	0	1	1	1	0	0	0	0	1	0	0	0	0	0	0	0	0	0	0	0	0	0	0	0	0	0	1	0	1	0	0	0	0	1	1	0	0	0	0	0	1	0
talampicillin	0	0	0	0	0	0	0	0	0	0	0	0	1	0	0	0	1	0	1	0	0	0	0	0	0	0	0	0	0	1	0	1	1	1	0	1	1	0	0	1	1	0	1	0	0	0	0	0	1
tamoxifen	0	0	0	1	0	0	1	0	1	1	1	1	0	0	0	1	0	0	0	1	1	1	0	0	0	0	0	1	0	0	0	0	0	1	0	1	0	1	0	1	1	0	0	0	0	1	1	1	0
tanespimycin	0	0	0	1	1	0	0	0	0	1	1	1	0	0	0	0	1	0	1	0	0	0	1	0	1	0	0	0	0	1	1	0	1	0	0	1	0	0	0	1	0	0	1	0	0	0	0	0	0
telenzepine	0	0	0	0	0	0	0	0	0	0	0	0	0	0	0	0	0	0	0	0	0	0	0	0	0	0	0	0	0	0	0	1	0	0	0	0	0	0	0	0	0	0	0	0	0	0	0	0	0
tenoxicam	0	0	0	0	1	1	1	1	0	0	0	0	0	0	0	0	0	0	0	1	1	0	0	0	0	0	0	0	0	0	0	0	0	1	0	0	0	0	0	0	0	0	0	0	0	0	0	0	0
terazosin	0	0	0	1	0	0	0	0	0	0	0	0	0	0	0	0	0	1	1	1	0	1	0	0	0	0	0	0	0	0	0	0	1	0	0	0	0	0	1	0	0	0	0	0	0	0	0	1	1
terbutaline	0	0	0	0	0	0	0	1	0	0	0	0	0	0	0	0	0	1	1	0	0	0	0	1	0	0	1	0	1	0	0	0	1	0	1	0	0	1	0	1	1	0	0	0	0	1	1	0	0
terconazole	0	0	0	1	0	0	0	0	0	0	0	0	0	0	0	1	0	0	1	0	0	0	0	1	0	0	0	0	0	1	0	0	1	1	0	0	0	0	0	1	1	0	0	0	0	0	1	0	1
terfenadine	1	1	0	1	0	0	1	0	1	1	1	1	1	0	1	0	1	1	0	1	0	1	1	1	1	0	1	0	1	0	1	0	0	0	1	1	0	0	0	0	0	0	1	1	0	1	1	1	0
terguride	0	0	0	0	0	0	0	0	0	0	0	0	0	0	0	1	0	0	1	1	0	0	0	0	0	1	0	0	0	1	0	0	1	0	0	1	0	0	1	0	0	0	0	1	0	0	0	0	1
testosterone	0	0	0	0	0	0	0	0	0	1	0	0	0	0	0	0	0	0	0	0	0	0	1	0	0	1	0	0	0	0	0	1	0	0	0	0	0	1	0	0	0	1	1	1	1	0	1	0	1
tetracaine	0	0	0	0	0	0	0	0	0	0	0	0	0	0	0	0	0	0	0	0	1	0	0	0	0	0	1	0	0	0	0	0	1	0	0	0	0	0	0	0	1	0	0	1	0	0	0	0	0
tetracycline	0	0	0	0	0	0	0	0	0	0	0	0	0	0	0	1	0	1	0	1	0	0	1	0	0	1	0	1	0	0	1	1	0	0	0	0	0	1	0	0	0	0	0	0	1	0	0	0	1
tetraethylenepentamine	0	0	0	0	0	0	1	1	0	0	0	0	0	1	0	0	1	0	1	0	1	0	0	0	0	0	1	0	1	0	0	1	1	1	1	0	1	0	1	0	0	0	0	1	1	0	0	0	0
tetrahydroalstonine	0	0	0	0	0	1	1	1	1	1	1	0	1	0	0	1	0	0	0	0	1	0	0	0	0	0	0	0	0	0	0	0	0	0	0	1	0	0	0	0	1	0	0	0	1	0	1	0	0
tetramisole	0	0	0	0	0	0	0	0	1	0	0	0	0	0	0	0	0	0	0	0	0	0	0	0	0	0	0	0	0	0	0	0	1	0	0	0	0	0	0	0	0	0	0	0	0	0	0	0	1
tetrandrine	0	0	0	1	0	1	0	0	0	1	1	1	0	0	0	0	0	1	1	0	0	0	1	0	0	1	0	0	0	1	0	0	1	0	0	1	1	0	1	0	0	1	0	0	0	0	1	0	1
tetroquinone	0	0	0	0	0	0	0	0	0	0	0	0	0	0	1	1	0	0	0	1	0	0	0	0	0	0	0	0	0	0	0	0	1	0	0	1	0	1	0	1	1	0	0	0	0	0	0	0	0
tetryzoline	1	0	0	0	0	0	0	0	0	0	0	1	0	0	1	0	0	0	0	0	1	0	1	1	0	0	1	1	0	0	0	1	0	0	0	0	0	0	0	0	0	0	0	0	0	0	1	1	0
thalidomide	0	0	0	0	0	0	0	0	1	0	0	0	0	0	1	0	0	0	0	1	0	0	0	0	0	0	0	1	0	0	0	0	0	0	0	0	0	0	0	0	0	0	0	0	1	0	0	1	0
thapsigargin	0	1	1	1	0	0	0	0	1	1	1	0	1	0	0	1	0	0	1	0	0	1	1	0	0	1	0	0	1	1	1	0	0	0	1	0	0	0	0	1	1	0	1	0	0	0	1	0	0
theobromine	1	1	0	0	0	0	0	0	0	0	0	0	1	0	0	0	0	0	0	0	0	0	0	0	0	0	0	0	0	1	0	0	0	0	0	0	0	0	1	0	0	1	0	0	1	0	0	0	1
theophylline	0	0	0	0	1	1	1	0	0	0	0	0	0	0	0	0	0	0	0	0	1	0	0	0	0	0	0	0	0	0	0	0	0	1	0	1	0	1	0	0	0	1	0	0	0	0	0	0	1
thiamazole	0	0	0	0	0	1	0	1	0	0	0	0	0	0	0	0	0	0	0	1	0	1	1	0	0	0	0	0	0	1	0	0	1	1	0	0	0	0	0	1	0	0	0	0	0	0	0	0	1
thiamine	0	0	0	0	0	0	0	0	0	0	0	0	0	0	0	0	0	0	0	1	1	0	0	0	0	1	0	1	0	0	0	0	0	0	0	0	0	1	1	0	0	0	0	0	1	0	0	0	0
thiamphenicol	0	1	0	0	0	1	0	0	0	0	0	0	1	0	0	0	0	1	0	1	0	0	0	0	0	1	0	0	0	0	0	0	0	0	0	0	0	0	1	0	0	0	0	0	0	0	0	0	1
thiethylperazine	0	0	0	1	0	1	1	1	0	0	1	1	0	0	0	0	0	1	0	0	1	1	1	0	0	0	0	1	1	0	0	1	1	0	0	0	0	1	1	0	0	1	0	0	0	0	1	0	0
thiocolchicoside	0	0	0	0	0	0	1	0	1	0	0	0	0	0	1	0	0	0	0	0	0	0	0	1	0	0	0	1	0	0	0	0	0	1	0	0	0	1	0	0	0	0	0	0	0	0	0	0	1
thioguanosine	0	0	1	0	0	0	1	1	0	1	1	1	1	1	1	1	1	0	0	0	1	1	0	1	1	0	0	0	0	0	1	0	0	0	0	0	1	1	0	0	0	0	1	0	0	1	0	0	0
thioperamide	0	0	0	0	1	1	1	1	0	0	0	0	0	0	1	0	1	0	0	1	0	0	1	0	0	1	0	0	1	1	0	0	1	0	0	0	1	0	0	0	0	1	0	1	0	0	0	0	1
thioproperazine	0	0	0	1	0	1	1	0	0	0	1	1	0	0	0	0	0	1	0	0	0	0	0	0	0	1	0	0	1	0	0	0	0	0	0	0	0	0	1	0	0	0	0	1	0	1	1	0	1
thioridazine	1	0	0	1	0	0	1	0	0	1	1	1	1	0	0	0	1	1	1	0	1	1	1	1	1	0	0	0	1	0	1	1	1	0	0	1	1	0	1	1	0	0	1	1	0	1	1	0	0
thiostrepton	0	0	1	1	1	0	0	0	1	1	1	1	0	0	1	0	1	1	0	0	0	0	0	1	1	0	1	1	0	0	1	0	0	0	0	1	0	0	0	0	0	0	0	1	0	0	0	0	0
tiabendazole	0	0	0	0	0	0	0	0	0	0	0	0	0	0	0	1	0	0	0	0	0	0	0	1	1	0	0	1	0	1	0	0	0	0	0	0	0	0	0	0	0	0	0	0	0	0	0	1	1
tiapride	1	1	0	0	0	1	0	0	1	0	0	0	0	0	1	1	0	0	1	0	1	0	0	1	0	0	0	0	0	1	0	0	0	1	0	0	0	1	0	0	1	0	0	0	0	0	0	0	0
tiaprofenic acid	0	0	0	0	0	0	0	0	0	0	0	0	0	0	1	0	0	0	0	0	0	0	0	0	0	0	1	1	1	0	0	0	1	0	0	0	0	0	0	0	0	0	1	1	0	0	0	0	0
ticarcillin	0	0	1	0	0	0	0	0	0	0	0	0	0	0	0	0	0	0	0	0	1	0	0	0	0	0	0	0	1	1	0	0	0	1	1	0	0	1	1	0	0	0	0	0	0	0	0	0	1
ticlopidine	0	0	0	0	1	0	1	1	0	1	0	0	0	0	0	0	0	0	1	1	1	1	0	1	0	0	0	1	0	0	1	0	0	1	0	1	0	0	0	0	0	1	1	0	0	1	1	0	0
tiletamine	1	0	0	0	0	0	1	0	0	0	0	0	0	0	0	0	0	0	0	0	1	0	0	0	0	0	0	0	0	0	0	0	0	0	0	0	0	1	0	0	0	0	0	0	0	0	0	0	0
timolol	0	0	0	0	1	1	1	1	0	0	0	0	0	0	1	0	0	0	0	1	0	0	1	0	0	0	0	0	1	0	0	0	1	0	0	0	0	0	1	0	0	1	0	0	0	0	0	0	1
tinidazole	0	0	0	0	0	0	1	0	0	0	0	0	0	0	0	0	0	0	0	0	1	1	0	1	0	0	0	0	0	0	0	0	0	1	0	0	0	0	1	0	0	0	0	0	0	1	0	0	0
tioguanine	1	1	1	0	0	0	0	0	0	0	0	0	0	1	1	0	1	0	0	1	1	0	1	1	1	1	0	0	1	0	0	1	0	0	1	0	1	0	0	1	0	0	1	0	1	1	0	0	0
tiratricol	0	0	0	0	1	1	1	1	0	0	0	0	0	0	1	0	0	1	0	0	0	0	0	0	0	1	0	1	0	0	0	0	1	0	0	0	0	0	0	0	1	1	0	0	1	0	0	0	1
tobramycin	1	0	1	0	0	0	0	0	0	0	0	0	0	0	1	1	0	0	0	0	0	0	1	1	1	1	1	1	1	0	0	0	0	0	0	0	0	1	1	1	1	0	1	0	1	0	0	0	0
tocainide	0	0	0	0	1	1	1	0	1	0	0	0	0	0	0	0	0	0	0	1	1	1	0	0	0	0	0	0	0	0	0	0	1	1	0	1	0	1	0	0	0	0	0	0	0	0	0	0	1
todralazine	0	0	0	0	0	1	0	0	1	0	0	0	0	0	0	0	0	0	0	0	0	0	0	0	0	0	0	1	0	0	0	1	0	0	0	0	0	0	0	1	0	0	0	0	1	0	0	0	0
tolazamide	0	0	1	0	0	0	0	0	0	0	0	0	0	0	0	1	0	0	0	1	0	1	1	0	0	1	0	0	1	1	0	0	0	0	0	0	0	0	1	0	0	0	0	0	0	0	0	0	1
tolazoline	0	0	0	0	0	1	1	1	1	0	1	0	0	0	1	0	0	0	0	1	1	1	0	0	0	0	0	0	0	0	0	0	1	0	0	0	0	1	0	0	0	0	0	0	0	0	1	0	0
tolbutamide	0	0	0	0	0	0	0	0	0	0	0	0	0	0	0	0	0	0	0	1	1	1	0	0	0	0	0	0	0	0	0	0	0	1	0	0	0	1	0	0	0	0	0	0	0	0	0	0	0
tolfenamic acid	0	0	0	0	0	0	0	0	0	0	0	0	0	1	0	0	0	0	1	0	1	0	0	1	0	0	0	1	1	0	0	1	0	0	1	0	1	1	0	0	0	0	1	0	1	0	0	0	0
tolmetin	0	0	0	0	0	0	0	1	0	0	0	0	0	0	1	0	0	0	0	1	0	0	0	0	0	0	0	1	0	0	0	0	1	0	0	0	0	1	0	1	0	1	1	0	0	0	0	0	0
tolnaftate	0	0	0	0	0	1	1	1	0	1	1	0	0	0	0	0	0	0	0	1	1	0	0	0	0	0	0	0	0	0	0	0	1	0	0	0	0	0	0	0	0	0	0	0	0	0	0	0	0
tomatidine	0	1	0	1	0	0	0	1	0	0	0	0	0	1	1	1	1	0	0	0	0	0	0	1	0	0	1	1	0	1	0	0	0	0	1	0	0	0	0	0	1	0	0	0	0	0	0	0	0
tomelukast	0	0	0	1	1	1	1	1	0	1	1	0	0	0	1	0	0	0	0	1	1	1	0	0	0	1	0	0	0	0	0	0	1	1	0	1	0	1	0	0	1	1	0	0	1	0	1	0	0
tonzonium bromide	1	0	0	1	0	0	0	0	0	1	0	1	1	0	0	1	1	0	0	0	1	1	1	0	1	0	0	1	1	1	1	0	0	0	0	0	0	0	1	1	0	0	1	1	0	1	1	0	0
topiramate	0	0	0	0	0	1	1	0	0	0	0	0	0	0	0	0	0	0	0	0	0	0	0	0	0	1	1	0	0	0	0	0	0	0	1	0	0	1	0	0	1	0	0	0	1	0	0	0	0
torasemide	0	1	0	0	0	0	0	0	0	0	0	0	1	0	1	0	0	0	1	0	0	0	1	0	0	1	0	0	0	1	0	0	0	1	0	0	1	0	1	0	0	0	0	0	1	0	0	0	1
tracazolate	1	0	0	0	0	0	0	1	0	1	0	0	0	1	0	0	0	0	1	0	0	1	0	1	0	0	0	0	1	0	1	0	0	0	1	0	1	1	0	1	1	0	1	0	1	0	1	0	1
tranexamic acid	0	0	0	0	0	1	0	1	0	0	0	0	0	0	0	0	0	0	1	0	0	0	0	0	0	0	0	1	0	0	0	0	0	0	0	0	0	1	1	0	1	0	0	0	0	0	0	0	1
tranylcypromine	1	0	0	0	0	0	0	1	1	0	0	1	1	0	0	1	0	0	0	0	0	0	0	0	0	1	0	0	1	0	0	0	0	0	0	0	1	0	1	1	1	0	0	0	0	0	0	0	0
trapidil	0	0	0	0	0	1	0	0	0	0	0	0	0	0	1	0	0	0	0	1	0	0	0	1	0	0	1	0	0	0	0	0	0	0	0	0	0	0	0	0	0	0	0	0	0	0	0	0	1
trazodone	0	0	0	1	0	0	0	0	0	0	0	0	0	1	0	0	0	0	0	0	0	0	0	1	0	0	0	1	0	0	0	1	0	0	1	0	0	0	0	1	0	0	1	1	0	1	0	1	0
tremorine	0	0	0	0	0	0	0	1	0	0	0	0	0	1	0	0	0	0	0	0	0	0	0	0	0	1	0	1	0	0	0	1	0	0	0	0	0	0	0	0	0	0	0	0	1	0	0	0	0
tretinoin	0	0	1	0	0	0	1	0	0	0	0	0	1	0	1	0	0	1	0	0	1	0	0	0	1	0	0	0	0	0	1	0	1	0	0	1	1	0	0	0	0	0	1	0	0	0	1	1	0
triamcinolone	0	0	0	0	0	0	0	1	0	0	0	0	0	0	0	1	0	0	1	0	1	0	0	0	0	0	1	0	0	1	0	0	0	0	0	0	1	1	0	0	1	1	1	0	0	0	0	0	0
triamterene	0	0	1	0	0	0	0	0	0	1	1	1	0	0	0	0	0	1	0	0	0	1	1	0	1	1	0	0	0	0	0	1	1	0	0	0	0	0	1	0	0	0	0	0	0	0	1	0	1
tribenoside	1	1	0	0	0	1	0	0	0	1	0	1	1	0	0	0	0	1	0	0	0	1	1	1	0	0	0	0	0	0	0	1	0	0	0	0	0	0	0	0	0	1	0	0	1	0	1	0	0
trichlormethiazide	0	0	0	0	0	0	0	0	0	0	0	0	0	0	1	1	0	0	0	0	0	0	0	0	0	0	0	0	1	1	0	0	0	0	0	0	0	0	1	1	0	0	0	0	0	0	0	0	1
trichostatin A	0	0	1	1	0	0	0	0	0	0	0	1	0	1	1	0	1	0	1	0	0	1	0	1	1	0	1	0	0	0	1	0	0	0	0	0	1	0	0	0	1	0	0	1	0	0	1	1	0
tridihexethyl	0	0	0	0	0	0	0	0	0	0	0	0	0	0	1	0	0	0	0	0	0	0	0	0	0	0	0	0	0	1	0	0	0	0	0	0	0	1	1	0	0	0	0	0	1	0	0	0	1
trifluoperazine	0	0	1	1	0	0	1	1	0	1	1	1	1	0	0	0	1	1	1	0	1	1	1	1	1	0	0	0	0	0	1	1	0	0	0	1	1	0	0	0	0	1	1	1	0	1	1	0	0
triflupromazine	0	0	0	1	0	0	1	0	1	0	0	0	0	0	0	0	0	0	1	1	0	1	0	0	0	0	0	1	0	0	1	0	1	1	0	0	0	1	0	1	0	0	1	0	0	0	0	0	0
trifluridine	0	0	1	0	0	0	0	0	0	0	0	1	1	0	0	0	0	0	1	0	1	0	0	0	1	0	0	1	0	0	0	0	0	0	0	1	1	1	1	0	0	0	0	0	0	0	1	1	1
triflusal	0	0	0	0	0	0	0	0	0	0	0	0	0	0	0	0	0	0	1	0	0	0	0	0	0	0	0	1	0	0	0	0	1	0	0	0	0	0	1	0	0	0	0	0	0	0	0	0	0
trihexyphenidyl	0	1	0	0	0	1	1	1	0	0	1	1	1	0	0	0	0	0	1	0	0	0	0	0	0	0	1	1	0	1	0	0	0	0	0	0	0	0	0	1	1	0	0	1	1	0	0	0	1
trimetazidine	1	0	0	0	0	0	0	0	0	0	0	0	0	1	0	0	0	0	0	0	0	0	1	1	0	1	0	0	0	0	0	0	0	0	1	0	0	1	1	1	0	0	1	0	0	0	0	0	1
trimethadione	0	0	0	0	0	0	0	0	0	0	0	0	0	1	0	0	0	1	0	0	0	0	0	0	0	1	0	0	0	0	0	1	1	0	0	0	0	0	0	0	0	0	0	0	1	0	0	0	1
trimethobenzamide	0	0	0	0	1	1	1	0	0	0	0	0	0	0	0	0	0	0	1	1	0	1	0	0	1	0	0	1	0	0	0	0	1	1	0	0	0	0	1	0	1	0	0	0	0	1	0	0	0
trimethoprim	0	0	0	0	0	0	0	0	1	0	0	0	0	0	0	1	0	0	0	0	1	1	0	0	0	0	0	0	0	1	0	0	0	1	0	0	0	1	0	0	0	0	0	0	0	0	0	0	1
trimethylcolchicinic acid	0	0	1	0	0	0	0	0	0	0	0	0	1	0	1	1	0	1	1	0	0	0	0	0	0	0	1	0	1	1	0	0	0	1	0	0	0	0	1	0	1	0	0	0	0	0	0	0	1
trimipramine	0	0	0	1	0	0	0	0	0	1	1	1	0	0	1	0	0	1	0	0	0	1	1	0	0	0	1	0	0	0	1	1	0	0	0	1	0	1	0	0	0	0	0	1	1	1	1	0	0
trioxysalen	0	0	1	0	0	0	0	0	0	0	0	0	0	1	1	1	0	0	1	0	0	0	0	1	1	0	1	0	1	0	0	0	0	0	1	0	1	0	1	1	0	0	1	0	1	0	0	0	0
triprolidine	0	0	0	0	0	1	1	1	1	0	1	0	0	0	0	0	0	0	0	0	0	0	0	0	0	1	0	1	0	0	0	0	0	1	0	0	0	0	0	0	1	1	0	0	0	0	0	0	1
troglitazone	0	0	0	1	1	0	1	1	0	0	1	0	0	0	0	0	0	0	1	0	1	1	0	0	0	0	0	0	0	1	1	0	0	1	1	1	1	1	1	1	0	0	1	0	0	0	1	0	0
troleandomycin	0	0	0	0	0	0	1	1	0	0	0	0	0	0	0	0	0	0	0	1	1	0	0	0	0	0	1	0	0	0	0	0	0	1	0	0	0	0	0	0	1	0	0	0	0	0	0	0	1
Trolox C	0	1	0	0	0	0	0	1	0	0	0	0	0	0	0	0	0	0	0	1	0	0	1	0	0	1	0	0	0	0	0	0	1	0	0	0	0	0	1	0	0	0	0	0	1	0	0	1	0
tropicamide	1	0	0	0	0	0	0	0	0	0	0	0	0	0	0	0	0	0	0	0	1	0	0	1	0	0	0	1	0	1	0	0	0	1	0	0	0	1	0	0	0	0	0	0	0	0	0	0	0
tropine	0	0	0	0	0	0	1	0	1	0	0	0	0	0	0	0	0	0	0	0	0	0	0	0	0	0	0	0	0	1	0	0	1	0	0	0	0	1	0	0	0	0	0	0	0	0	0	0	1
TTNPB	0	0	0	0	1	1	1	1	0	0	1	0	1	0	1	0	0	0	0	0	1	0	0	0	0	0	1	0	0	0	0	0	1	1	0	1	0	0	1	0	1	1	0	0	0	0	1	0	0
tubocurarine chloride	0	0	0	0	0	0	0	0	0	0	0	0	0	1	0	0	0	0	1	0	0	0	1	1	0	1	0	0	0	1	0	1	0	0	1	0	0	1	1	0	1	0	1	1	1	0	0	0	1
tyloxapol	1	1	0	1	0	0	0	0	0	0	0	1	0	0	1	1	1	0	1	0	0	0	0	0	1	1	0	1	0	1	0	0	0	0	0	0	1	0	1	1	0	0	0	1	0	0	0	0	0
tyrphostin AG-1478	0	0	1	0	0	1	0	1	0	1	1	1	0	0	1	1	0	0	0	1	0	1	1	0	1	1	0	1	0	0	1	0	0	0	1	0	1	0	1	0	0	0	1	0	0	0	1	0	0
tyrphostin AG-825	0	0	1	0	0	0	1	1	1	0	0	0	0	1	1	0	1	0	0	0	1	1	0	0	1	0	0	0	0	0	1	0	0	1	0	0	1	1	0	0	0	0	0	0	0	1	0	1	0
U0125	0	0	0	0	0	1	1	0	1	0	0	0	1	0	0	0	0	1	1	0	0	1	0	1	0	0	1	0	1	1	0	0	0	0	1	0	0	1	1	0	1	0	0	0	1	0	0	0	0
urapidil	0	0	0	0	0	0	0	1	1	0	0	0	0	0	0	1	0	0	0	1	0	0	1	0	0	0	0	0	1	0	0	0	0	0	0	0	0	0	1	1	0	0	0	0	0	0	0	0	1
ursodeoxycholic acid	0	0	0	0	0	0	0	1	0	0	0	0	0	0	0	0	0	0	0	0	0	0	0	0	0	0	1	0	0	0	0	0	0	1	0	0	0	0	0	0	1	0	0	0	0	0	0	0	0
ursolic acid	0	0	0	1	0	1	1	1	0	0	1	0	0	0	0	0	0	0	1	0	1	0	0	0	0	0	1	0	0	1	0	1	1	1	0	1	1	0	0	0	0	0	0	0	0	0	1	0	0
valdecoxib	0	0	0	0	0	0	0	0	0	0	0	0	0	0	0	0	0	0	0	0	0	0	0	0	0	0	0	0	0	0	0	0	1	1	0	0	0	0	1	0	0	0	0	0	0	1	0	0	0
valinomycin	0	1	0	0	0	0	0	0	1	1	0	0	1	0	1	0	0	1	0	0	0	1	1	0	0	0	0	0	0	1	1	0	1	0	0	0	0	0	0	1	0	0	1	0	0	0	1	0	0
valproic acid	1	0	0	0	0	0	0	0	0	0	1	1	0	1	0	1	0	0	1	0	0	0	0	1	0	0	0	0	0	0	0	0	0	0	0	0	1	0	1	0	1	0	0	1	0	0	0	1	0
vancomycin	0	0	0	0	0	0	1	0	0	0	0	0	0	0	0	0	0	1	0	1	0	0	0	0	0	0	1	0	0	0	0	0	0	0	0	0	0	0	0	0	1	0	0	0	0	0	0	0	0
vanoxerine	0	0	0	0	0	0	0	0	1	1	0	0	0	0	1	1	0	0	0	1	0	1	1	1	0	0	0	1	1	0	1	0	0	0	1	0	0	0	0	1	1	1	1	0	0	1	1	0	0
velnacrine	0	0	0	0	0	1	0	1	1	0	0	0	0	0	1	0	0	0	0	0	0	0	1	0	0	1	1	0	0	1	0	0	1	1	0	0	0	0	0	0	0	0	0	1	1	0	0	0	0
verapamil	1	1	1	1	0	0	1	1	1	0	0	1	0	1	1	1	1	0	1	0	1	0	1	0	1	1	1	1	0	0	0	1	0	0	1	0	1	0	0	0	0	0	1	1	0	1	0	0	0
verteporfin	0	0	0	0	0	0	0	0	0	1	0	0	0	0	0	0	0	1	1	0	0	1	0	1	0	0	0	0	0	0	1	0	0	0	1	0	0	1	0	0	1	0	0	0	0	1	0	0	0
vidarabine	0	0	1	0	0	0	0	0	1	0	0	0	0	0	1	1	0	1	0	0	0	0	0	0	0	0	1	0	0	0	0	0	0	0	0	0	0	0	0	0	1	0	0	0	0	0	0	1	0
vigabatrin	0	1	0	0	0	1	1	1	0	0	0	1	0	0	0	0	0	0	0	0	0	0	0	0	0	0	0	0	0	1	0	0	1	0	0	0	0	1	0	1	1	0	0	1	0	0	0	0	0
vinblastine	0	0	0	1	0	0	0	0	1	1	0	0	1	0	0	1	0	0	0	1	0	0	1	0	0	0	0	0	0	0	0	0	0	1	0	0	0	0	0	0	0	0	0	0	0	1	0	0	0
vinburnine	0	0	0	0	1	1	1	1	0	0	0	0	1	0	0	0	1	0	0	0	0	0	0	0	0	0	1	0	1	0	0	0	1	0	1	0	0	1	0	1	1	0	0	1	0	1	0	0	0
vincamine	1	0	0	0	0	1	1	1	0	0	0	0	0	0	0	0	0	0	0	1	1	0	0	0	0	0	1	0	0	0	0	0	0	0	0	0	0	1	0	0	1	0	0	0	0	0	0	0	0
vinpocetine	0	1	0	0	0	0	0	0	0	0	0	0	0	0	0	1	0	0	0	0	0	0	0	0	0	0	0	0	0	0	0	1	0	1	0	0	0	0	0	0	0	0	0	0	0	0	0	0	0
viomycin	0	0	0	0	0	1	1	0	0	0	0	0	0	0	0	0	0	1	0	0	0	0	0	0	0	0	0	0	1	0	0	0	0	0	0	0	0	1	0	0	1	0	0	0	1	0	0	0	1
vitexin	0	0	0	0	0	0	0	0	0	0	0	0	0	0	0	0	0	1	0	1	0	0	1	0	0	1	0	0	0	1	0	1	0	0	0	0	0	0	0	0	0	0	0	0	0	0	0	0	0
vorinostat	0	0	1	1	0	0	0	0	0	0	0	1	0	1	0	0	1	0	1	0	0	1	0	1	1	0	0	0	0	0	1	1	0	0	0	0	1	0	0	0	1	0	0	1	0	0	0	1	0
W-13	0	1	1	1	0	0	0	0	1	0	0	1	0	1	1	1	1	0	0	0	1	0	1	1	1	1	0	0	1	0	1	1	1	1	1	0	1	1	0	1	0	0	1	1	1	1	0	1	0
withaferin A	0	0	1	1	1	0	0	0	0	1	1	1	1	0	0	0	1	0	1	0	0	1	1	1	1	0	0	0	0	1	1	0	0	0	0	1	1	1	1	0	0	0	0	1	0	1	0	1	0
wortmannin	0	0	0	0	0	0	1	0	0	0	0	1	1	0	0	0	1	1	0	1	1	1	1	1	1	0	0	0	0	0	1	0	1	0	0	0	1	1	0	1	0	1	1	0	0	1	1	0	0
xamoterol	0	0	0	0	0	0	1	0	0	0	0	0	0	0	0	0	0	1	0	1	1	0	0	0	0	0	0	0	1	0	0	0	0	0	0	0	0	1	0	0	0	1	0	0	0	0	0	0	0
xylazine	0	0	0	0	0	0	0	0	0	0	0	0	0	1	0	0	0	0	0	0	1	0	1	1	0	0	1	1	0	0	0	1	0	0	1	0	0	0	0	0	0	0	0	0	1	1	0	0	0
xylometazoline	1	1	0	0	0	0	0	1	1	0	0	1	0	0	1	1	0	0	0	0	0	0	1	1	1	1	0	0	1	0	0	0	0	0	0	0	0	0	1	1	0	0	0	1	1	0	0	0	0
Y-27632	1	1	0	1	0	0	0	0	0	0	0	0	0	0	1	0	0	0	0	0	0	0	0	0	0	0	1	0	1	0	0	0	0	0	0	0	0	0	1	0	0	0	0	0	1	0	0	0	0
yohimbic acid	0	1	0	0	0	1	0	0	0	0	0	0	0	0	0	0	0	1	0	1	0	0	1	0	0	1	1	0	1	1	0	0	0	0	0	0	0	0	1	0	0	0	0	0	1	0	0	0	1
yohimbine	0	0	0	0	0	0	0	0	0	0	0	0	0	0	0	1	0	0	0	0	0	0	0	0	0	0	0	0	0	1	0	1	0	1	0	0	0	0	0	0	0	0	0	1	1	0	0	0	1
zalcitabine	1	1	1	0	0	1	0	1	0	0	0	0	0	0	0	1	0	0	0	1	1	0	0	0	0	0	1	0	0	0	0	0	1	0	0	0	0	0	0	0	0	0	0	1	0	0	0	0	0
zaprinast	0	0	0	1	1	1	1	1	0	0	1	0	0	0	0	0	0	0	0	0	0	0	0	0	0	0	0	0	0	0	0	0	0	0	0	0	0	0	0	0	1	0	0	0	0	0	1	0	1
zardaverine	0	1	0	0	0	1	0	1	0	0	0	1	0	0	0	1	0	0	1	1	1	1	0	0	1	0	1	0	0	0	0	0	0	0	0	0	0	0	0	0	0	0	0	0	0	0	1	1	0
zidovudine	0	0	1	0	0	1	1	1	0	0	1	0	0	0	0	0	0	1	0	0	0	0	1	0	0	1	0	0	0	0	0	1	0	0	0	0	0	0	0	0	0	1	0	1	0	1	0	0	1
zimeldine	1	0	0	0	0	0	1	0	0	0	0	0	0	1	0	0	0	0	0	1	1	0	0	1	1	0	0	0	1	0	0	0	0	1	1	0	0	1	0	0	0	0	0	1	0	1	0	0	0
zomepirac	0	1	0	0	0	0	0	0	0	0	0	0	0	0	0	0	0	1	0	0	0	0	0	0	0	1	0	0	0	0	0	1	0	1	0	0	0	0	0	1	0	0	0	0	0	0	0	0	1
zoxazolamine	1	0	0	0	0	0	0	0	0	0	0	0	0	0	0	1	0	0	0	0	0	0	1	0	1	0	0	0	0	0	0	1	0	1	0	0	0	0	0	0	0	0	0	1	1	0	0	1	1
zuclopenthixol	0	0	0	1	1	1	1	1	0	1	1	1	0	0	0	0	0	0	0	1	1	0	1	0	0	0	0	0	1	0	0	0	1	0	0	1	1	0	0	1	0	0	0	1	0	1	1	0	0
5109870	0	0	1	0	0	0	0	0	0	1	0	1	1	0	1	0	0	1	0	0	0	0	1	0	1	0	0	0	0	0	1	1	1	0	0	0	1	1	0	0	0	0	1	0	0	1	1	1	1
5114445	0	0	0	0	0	0	0	1	1	1	0	1	0	0	1	1	0	0	0	0	1	0	0	0	1	0	0	0	0	0	1	0	0	0	0	0	1	0	0	0	0	0	1	0	0	0	0	0	0
5140203	0	0	0	0	0	0	0	0	0	0	0	0	0	0	0	0	0	0	1	0	0	1	0	0	0	0	0	0	0	0	1	0	1	0	0	0	1	0	0	0	0	0	0	0	0	0	0	0	1
5149715	0	0	0	0	0	1	1	1	1	0	0	0	0	0	1	1	0	0	0	0	0	0	0	0	0	0	0	0	0	0	0	0	1	0	0	1	0	0	0	0	1	1	0	0	0	0	0	0	0
5151277	0	0	0	0	0	0	0	0	0	1	0	0	0	0	0	0	0	0	0	0	0	0	0	0	0	0	0	0	0	1	0	1	1	0	0	1	0	0	0	0	0	0	0	0	0	0	0	0	1
5152487	0	0	0	0	0	0	1	1	1	0	0	0	0	0	1	1	0	0	0	0	1	0	0	0	0	0	0	0	0	0	0	0	0	0	0	0	0	1	0	0	1	0	0	0	0	0	0	0	0
5155877	0	0	1	0	1	0	0	0	1	1	1	0	1	0	0	0	0	0	0	1	0	0	0	0	0	0	0	1	0	1	0	0	1	0	0	1	0	0	1	0	0	0	0	1	0	0	0	1	0
5162773	0	0	0	0	0	0	1	0	1	0	0	0	0	0	0	0	0	0	1	0	0	0	0	0	0	0	0	0	0	1	0	1	1	0	1	0	0	0	0	0	0	0	0	0	1	0	0	0	1
5182598	0	0	1	1	1	0	0	0	0	1	0	0	0	0	1	0	0	0	0	0	0	0	1	0	1	0	0	0	1	0	0	0	0	0	1	1	0	0	0	0	0	0	1	0	0	0	0	1	0
5186223	0	1	0	0	0	1	0	0	1	0	0	0	0	0	0	1	0	0	1	1	0	0	0	0	0	1	1	0	0	1	0	0	1	1	0	0	0	0	0	0	1	0	0	0	1	0	0	0	0
5186324	0	0	0	0	0	0	0	0	0	0	0	0	0	0	1	0	0	0	0	0	0	0	1	0	0	1	0	0	0	0	0	0	0	0	0	0	0	1	0	0	0	0	0	0	1	0	0	0	1
5194442	1	0	1	0	1	0	0	0	0	1	0	0	0	0	0	0	0	0	0	1	0	0	0	0	0	0	0	1	0	1	0	0	0	0	0	1	0	1	0	0	0	0	0	1	1	0	0	1	0
5211181	0	0	0	0	0	0	0	0	1	1	0	0	0	0	0	0	0	1	0	0	0	0	0	0	0	0	1	0	0	0	0	0	0	0	0	1	0	0	0	0	0	0	0	0	0	0	0	0	1
5213008	0	0	0	0	0	0	0	0	0	0	0	0	1	0	0	0	0	1	1	0	0	0	0	0	0	1	0	0	0	1	0	1	1	0	1	0	0	0	0	0	0	0	0	0	1	0	0	0	1
5224221	0	1	0	0	1	0	0	0	0	1	0	1	1	0	1	0	0	0	0	0	0	1	1	0	0	0	0	0	1	1	1	0	1	0	0	1	0	0	1	0	0	0	1	0	0	1	1	0	1
5230742	1	1	0	0	0	0	0	0	0	0	0	0	0	0	1	0	0	1	0	1	0	0	1	1	0	0	1	0	1	0	0	0	0	0	1	0	0	0	1	1	1	0	1	0	0	1	0	0	0
5248896	0	0	0	0	0	0	0	0	0	1	0	0	0	0	1	0	0	0	0	0	0	0	0	0	0	0	0	0	0	0	0	0	0	1	0	0	0	0	1	0	0	0	1	0	0	0	0	1	1
5252917	1	1	0	0	0	0	1	0	0	1	0	0	1	0	1	0	0	0	0	0	0	0	0	0	0	0	0	0	1	0	0	0	0	1	0	0	0	0	0	1	1	0	1	0	0	1	1	0	0
5253409	0	0	0	0	1	0	0	0	1	1	0	0	1	1	1	0	0	0	0	0	0	1	0	1	0	1	1	0	1	0	1	0	0	0	0	1	1	1	0	0	0	0	1	0	0	1	1	0	1
5255229	0	1	0	0	0	0	1	0	0	1	0	0	0	0	1	0	0	0	0	0	0	1	0	0	0	1	1	0	1	1	0	0	0	0	0	0	0	0	1	0	1	0	1	0	0	0	0	0	0
5279552	0	1	1	0	0	0	0	0	0	0	0	0	0	0	1	0	0	1	0	0	0	0	1	0	0	1	0	0	1	0	0	0	1	0	1	1	1	0	1	0	1	0	1	0	1	0	0	0	1
5286656	0	0	0	1	0	0	1	0	0	0	0	0	0	0	1	0	0	0	0	1	1	0	0	0	0	0	0	0	0	0	0	0	0	0	0	1	0	1	0	0	0	0	0	0	0	0	0	0	0
5666823	0	0	0	0	1	1	1	1	0	1	1	0	0	0	0	0	0	0	0	0	1	1	0	0	0	1	0	0	0	0	0	0	0	0	0	1	1	0	1	0	1	0	0	0	0	0	1	0	0
5707885	0	0	1	1	0	0	0	0	1	1	1	1	1	0	1	1	0	0	1	0	0	1	0	0	1	0	0	1	0	1	1	0	1	0	0	0	1	0	0	0	0	0	0	0	0	1	1	0	0
(-)-atenolol	0	0	0	0	0	0	0	0	1	0	0	0	0	0	0	1	0	0	0	1	0	0	1	0	0	0	1	1	0	0	0	0	0	1	0	0	0	0	0	0	0	0	0	0	0	0	0	0	0
(-)-catechin	0	0	0	0	0	1	1	1	1	0	0	0	0	0	0	0	0	0	0	0	0	0	0	0	0	0	0	0	0	0	0	0	0	1	0	0	0	0	0	0	0	1	0	0	0	0	0	0	1
(-)-isoprenaline	0	0	0	0	0	0	1	0	1	0	0	0	0	0	0	0	0	1	1	0	0	0	0	0	0	0	0	0	0	0	0	1	0	0	0	0	0	0	1	0	0	0	0	0	0	1	1	0	1
(-)-MK-801	1	1	0	0	0	0	0	0	0	0	0	1	0	0	1	1	0	0	0	0	0	0	0	0	1	1	1	0	0	1	0	0	0	0	0	0	0	0	0	1	0	0	0	1	1	1	0	0	0
(+)-chelidonine	0	1	0	0	1	1	1	1	1	0	0	0	1	0	0	0	0	0	0	0	0	0	1	0	0	0	1	0	0	0	0	0	0	0	0	0	0	1	0	0	0	1	0	0	0	1	1	1	0
(+)-isoprenaline	0	0	0	0	0	0	1	0	0	0	0	0	0	0	0	1	0	0	1	0	0	0	0	1	0	0	0	1	1	0	0	0	0	0	0	1	0	0	0	0	0	1	0	0	0	0	1	1	0
(+/-)-catechin	0	0	0	0	0	0	0	0	0	0	0	0	0	0	0	1	0	0	0	1	0	0	0	0	0	0	0	0	0	0	0	0	0	0	0	0	0	0	1	0	0	0	0	0	0	0	0	0	1
0173570-0000	0	0	1	0	0	0	1	0	0	1	1	0	0	1	1	0	0	1	0	1	1	0	0	1	1	0	0	0	0	0	0	0	1	0	0	0	0	0	0	0	0	0	1	0	0	0	1	1	0
0175029-0000	0	0	1	0	0	0	0	0	1	0	0	1	1	1	0	0	1	0	0	0	1	1	0	0	1	0	0	0	0	0	1	0	1	0	0	0	1	1	0	0	0	0	1	1	0	0	0	0	0
0179445-0000	0	0	1	0	0	0	1	0	0	0	0	0	0	0	0	0	1	1	1	0	0	1	0	0	1	1	0	0	0	0	1	1	1	0	0	0	1	0	1	0	1	0	1	1	0	1	0	0	0
0198306-0000	1	0	0	0	0	0	0	0	0	0	0	0	0	1	0	0	0	1	0	0	0	0	0	1	1	0	0	0	1	0	0	1	0	0	1	0	0	0	1	0	0	0	1	0	1	0	0	0	0
0225151-0000	0	0	0	1	0	0	0	0	0	0	0	1	0	1	1	0	0	0	0	0	0	0	0	0	1	0	0	0	0	0	0	1	1	0	0	0	1	0	0	0	0	0	1	0	0	0	0	0	0
0297417-0002B	0	0	1	0	0	0	0	0	0	0	0	1	0	0	0	0	1	1	1	0	0	1	1	0	1	0	0	1	0	0	1	1	1	0	0	0	1	0	1	0	0	0	1	1	0	0	1	1	0
0316684-0000	1	0	0	0	0	1	1	1	0	0	0	0	0	0	1	0	0	0	0	0	0	0	0	0	0	0	0	0	0	0	0	0	0	1	0	0	0	0	1	0	0	0	0	0	0	0	0	0	0
0317956-0000	0	0	0	0	0	0	1	0	0	0	0	1	0	0	0	0	0	0	0	0	0	1	1	0	0	0	0	1	1	1	0	1	0	0	0	1	0	0	1	0	0	0	0	0	0	0	0	1	1
1,4-chrysenequinone	0	0	1	0	1	0	0	0	0	0	0	1	1	1	0	0	1	0	1	0	0	1	1	1	1	0	1	1	1	0	1	1	1	0	1	1	1	1	0	1	1	0	0	1	0	1	1	1	0
1,5-isoquinolinediol	1	1	1	0	0	0	0	0	1	0	0	1	0	1	1	1	1	1	1	1	0	0	1	1	1	0	1	1	1	1	1	1	0	1	1	0	1	0	1	1	1	0	0	0	0	0	0	0	0
10-methoxyharmalan	0	0	0	0	0	0	0	0	1	0	0	0	0	0	0	1	0	0	0	0	0	0	0	0	0	0	1	0	0	1	0	0	0	1	0	0	0	1	0	0	1	0	0	0	0	0	0	0	0
11-deoxy-16,16-dimethylprostaglandin E2	1	0	1	0	0	0	0	0	0	0	0	0	0	1	1	0	0	0	0	0	0	0	1	1	0	1	0	0	1	0	0	1	0	0	1	0	1	0	1	1	1	0	1	1	1	0	1	0	0
12,13-EODE	0	0	0	0	0	1	1	1	0	0	0	0	0	0	0	0	0	0	0	0	0	0	0	0	0	0	0	0	0	0	0	1	1	1	0	0	0	1	0	0	0	1	0	0	0	0	1	0	1
15(S)-15-methylprostaglandin E2	0	0	0	0	0	0	0	0	1	0	0	0	0	1	1	0	0	0	0	0	0	0	1	0	0	1	0	0	1	1	0	0	1	0	1	0	1	0	1	0	0	0	0	1	0	0	1	0	0
15-delta prostaglandin J2	0	1	1	1	1	0	0	0	0	1	0	1	1	0	0	0	1	0	1	0	0	0	1	1	1	0	0	0	0	1	1	0	1	0	0	1	1	0	0	0	0	0	0	1	0	0	0	1	0
16,16-dimethylprostaglandin E2	1	0	0	0	0	0	0	0	0	0	1	0	0	0	0	0	0	0	0	0	0	0	0	0	0	0	0	0	0	1	0	0	0	1	0	0	0	0	0	0	0	0	0	1	1	0	1	0	0
16-phenyltetranorprostaglandin E2	1	0	0	0	0	0	0	0	0	0	0	0	0	1	0	0	1	1	0	0	0	0	1	1	1	1	0	1	1	0	1	1	0	0	1	0	1	0	1	0	1	0	1	1	1	1	1	0	0
2,6-dimethylpiperidine	0	0	0	0	0	0	0	0	0	0	0	0	0	1	1	0	0	0	0	0	0	0	1	0	1	0	0	1	0	0	0	0	1	1	0	0	0	0	1	0	0	0	0	1	1	1	0	0	0
2-aminobenzenesulfonamide	0	0	0	0	0	1	1	1	0	0	0	0	0	0	0	0	0	0	0	1	0	0	0	0	0	0	1	0	1	1	0	0	1	0	0	0	0	1	0	1	1	0	0	0	0	0	0	0	0
2-deoxy-D-glucose	0	1	0	0	0	1	1	1	1	1	1	1	0	0	0	0	0	0	0	0	1	0	1	0	0	0	0	0	0	0	1	1	1	1	0	0	0	0	1	1	1	1	1	0	0	0	1	1	0
3-acetamidocoumarin	0	0	0	0	1	1	1	1	1	0	0	0	0	0	1	0	0	0	0	1	0	0	0	0	0	0	0	0	0	1	0	0	1	0	0	0	0	0	0	0	1	0	0	0	0	0	0	0	1
3-acetylcoumarin	0	0	0	0	1	1	1	1	0	0	0	0	0	0	1	0	0	0	0	0	0	0	1	0	0	0	0	1	0	0	0	1	0	0	0	1	0	0	0	0	0	0	0	0	1	1	0	0	0
3-aminobenzamide	0	0	0	0	0	0	0	0	1	0	0	0	0	0	0	0	0	0	0	0	1	1	0	1	1	0	1	0	1	0	1	0	1	1	0	0	1	1	1	0	1	1	1	0	0	0	0	1	0
3-hydroxy-DL-kynurenine	1	1	0	0	0	1	1	1	0	0	0	0	0	0	0	1	0	0	0	0	0	0	1	0	0	0	0	0	0	0	0	0	0	0	0	0	0	0	0	1	0	1	0	0	0	0	0	1	0
3-nitropropionic acid	0	0	0	0	0	0	1	1	0	0	0	0	0	1	1	0	0	0	0	0	0	0	0	0	0	1	0	1	1	0	0	1	1	0	1	0	0	0	1	0	0	0	0	0	0	1	0	0	0
4,5-dianilinophthalimide	1	1	1	0	0	0	0	0	0	0	0	1	0	1	1	0	1	1	1	1	0	0	1	1	1	1	1	0	1	1	1	1	0	0	1	0	1	1	0	0	1	0	1	1	0	1	0	0	0
4-hydroxyphenazone	0	0	0	0	0	0	1	1	0	0	0	0	0	0	0	0	0	0	0	0	0	1	0	0	0	0	0	0	1	0	0	0	1	0	0	0	0	1	0	0	1	0	0	0	0	0	0	0	0
6-azathymine	1	0	0	0	0	0	0	0	1	0	0	0	0	0	1	1	0	0	0	1	1	0	0	0	0	0	1	1	0	0	0	0	0	0	0	0	0	1	0	0	0	0	0	0	0	0	0	0	1
6-benzylaminopurine	0	0	0	0	0	0	0	0	0	0	0	0	0	1	0	0	0	0	1	1	1	0	0	1	0	0	0	0	0	1	0	0	1	1	0	0	1	0	0	0	0	0	1	0	0	0	0	0	0
6-bromoindirubin-3'-oxime	1	0	1	0	0	0	0	0	0	1	0	0	0	1	0	0	0	0	0	0	0	0	1	1	1	0	0	0	1	0	0	0	0	0	1	0	0	1	1	0	0	0	0	0	1	1	0	1	0
7-aminocephalosporanic acid	0	0	0	0	0	0	0	0	1	0	0	0	1	0	0	0	0	1	1	0	0	0	0	0	0	1	0	0	0	1	0	0	0	1	0	0	0	1	0	0	1	1	0	0	0	0	0	0	1
8-azaguanine	1	0	1	0	0	0	0	0	1	0	0	0	1	1	1	1	1	1	1	0	0	1	0	1	1	0	1	0	0	0	1	1	0	0	1	0	1	1	0	1	1	0	1	1	0	1	1	0	0

## Sheet: Table S2
Table S2. Pairwise Tanimoto coefficients for the gene module profiles of 1,309 agents
	abamectin	acacetin	acebutolol	aceclofenac	acemetacin	acenocoumarol	acepromazine	acetazolamide	acetohexamide	acetylsalicylic acid	acetylsalicylsalicylic acid	aciclovir	aconitine	adenosine phosphate	adiphenine	adipiodone	adrenosterone	AG-012559	AG-013608	AG-028671	AH-23848	AH-6809	ajmaline	albendazole	alclometasone	alcuronium chloride	alexidine	alfadolone	alfaxalone	alfuzosin	alimemazine	allantoin	alpha-ergocryptine	alpha-estradiol	alpha-yohimbine	alprenolol	alprostadil	alsterpaullone	altizide	altretamine	alverine	alvespimycin	amantadine	ambroxol	amikacin	amiloride	aminocaproic acid	aminoglutethimide	aminohippuric acid
abamectin	1	0.4375	0	0	0.0588235	0	0.222222	0.0714286	0.15	0.047619	0	0.1	0.047619	0.0434783	0.111111	0.05	0	0.176471	0.208333	0.176471	0	0	0.142857	0.2	0.111111	0.157895	0.259259	0.05	0.05	0.0588235	0.277778	0	0.388889	0.16	0.0625	0	0.25	0.222222	0.0666667	0.117647	0.125	0.192308	0.05	0.0666667	0.05	0	0.0588235	0.0666667	0
acacetin	0.4375	1	0	0	0.0555556	0.0714286	0.307692	0	0.142857	0.0454545	0	0.0952381	0.0952381	0.0869565	0.05	0.157895	0	0.105263	0.25	0.105263	0	0	0.205882	0.0869565	0.05	0.0454545	0.25	0	0.047619	0.117647	0.263158	0	0.181818	0.111111	0.0588235	0	0.166667	0.277778	0.133333	0	0.037037	0.142857	0	0.1	0.1	0.0952381	0.0555556	0.0625	0.047619
acebutolol	0	0	1	0.0714286	0.272727	0.111111	0.0740741	0	0.117647	0.125	0	0.125	0.2	0	0.230769	0.133333	0.0625	0.0666667	0	0.0666667	0.133333	0.0714286	0.16129	0.0526316	0.142857	0.125	0.153846	0.133333	0.214286	0	0.0555556	0.25	0.105263	0	0	0.2	0.142857	0.125	0	0.153846	0.210526	0.125	0.307692	0.0769231	0.0625	0.2	0.272727	0.0909091	0
aceclofenac	0	0	0.0714286	1	0.0714286	0.1	0.111111	0	0	0.0555556	0.0833333	0.1875	0.117647	0.4	0.214286	0.125	0.125	0.133333	0.181818	0.133333	0.125	0.142857	0.121212	0.105263	0.214286	0.0555556	0.0333333	0.2	0	0.0714286	0	0.230769	0	0.0833333	0.166667	0.357143	0.0625	0	0	0.142857	0.142857	0.0769231	0.0588235	0.318182	0.285714	0.1875	0.0714286	0.3	0.384615
acemetacin	0.0588235	0.0555556	0.272727	0.0714286	1	0.25	0.0740741	0.1	0.1875	0.0588235	0.2	0.285714	0.285714	0.111111	0.454545	0.133333	0.0625	0.230769	0.136364	0.0666667	0.214286	0.153846	0.16129	0	0.142857	0.2	0.0714286	0.214286	0.214286	0.166667	0.117647	0.153846	0.166667	0.0869565	0.0833333	0.125	0.142857	0.0588235	0.2	0.153846	0.15	0.0384615	0.214286	0.166667	0.307692	0.125	0.166667	0.333333	0.0625
acenocoumarol	0	0.0714286	0.111111	0.1	0.25	1	0	0	0.0714286	0	0.142857	0.272727	0	0.0666667	0.2	0.0833333	0	0	0.105263	0	0.0833333	0.1	0.0322581	0	0.0909091	0	0.04	0.181818	0	0	0.0714286	0.1	0.0625	0	0.285714	0	0.2	0	0	0	0	0	0.0833333	0.0434783	0.0833333	0	0	0.142857	0
acepromazine	0.222222	0.307692	0.0740741	0.111111	0.0740741	0	1	0.0833333	0.307692	0.137931	0.08	0.0645161	0.222222	0.166667	0.0333333	0.142857	0.103448	0.24	0.333333	0.148148	0.230769	0.2	0.59375	0.25	0.107143	0.178571	0.323529	0.0666667	0.185185	0.208333	0.259259	0.111111	0.0909091	0.37931	0.037037	0.178571	0.0689655	0.269231	0.173913	0.111111	0.266667	0.3125	0.103448	0.30303	0.185185	0.137931	0.16	0.0384615	0.230769
acetazolamide	0.0714286	0	0	0	0.1	0	0.0833333	1	0.230769	0.153846	0.5	0	0	0.0625	0.181818	0.0769231	0.0769231	0.181818	0.1	0	0.166667	0.2	0.0645161	0.214286	0.0833333	0.153846	0.08	0.166667	0.166667	0.222222	0.0666667	0	0.0588235	0.157895	0.111111	0	0.0833333	0	0.285714	0.2	0.111111	0.0909091	0.0769231	0.136364	0.166667	0.0714286	0.1	0.125	0.0769231
acetohexamide	0.15	0.142857	0.117647	0	0.1875	0.0714286	0.307692	0.230769	1	0.277778	0.214286	0.210526	0.277778	0.0416667	0.166667	0.222222	0.157895	0.105263	0.153846	0.105263	0.222222	0.176471	0.28125	0.25	0.05	0.352941	0.166667	0.1	0.1	0.357143	0.263158	0.176471	0.130435	0.304348	0.0588235	0.15	0.105263	0.0454545	0.307692	0.0526316	0.166667	0.185185	0.1	0.178571	0.157895	0.0454545	0.117647	0.0625	0.1
acetylsalicylic acid	0.047619	0.0454545	0.125	0.0555556	0.0588235	0	0.137931	0.153846	0.277778	1	0.0666667	0.1	0.294118	0.142857	0.176471	0.166667	0.4	0	0.16	0	0.05	0.117647	0.212121	0.263158	0	0.375	0.0967742	0.235294	0.166667	0.285714	0.0952381	0.1875	0.0416667	0.26087	0.0625	0.294118	0.0526316	0.047619	0.0666667	0.0555556	0.227273	0.24	0.235294	0.230769	0	0.047619	0.0588235	0.0666667	0.105263
acetylsalicylsalicylic acid	0	0	0	0.0833333	0.2	0.142857	0.08	0.5	0.214286	0.0666667	1	0.142857	0.0666667	0.125	0.166667	0.153846	0.0714286	0.166667	0.15	0.0769231	0.25	0.181818	0.0967742	0.125	0.0769231	0.0666667	0.0769231	0.153846	0.153846	0.2	0.0625	0	0.0555556	0.15	0.222222	0.0666667	0	0	0.25	0.0833333	0.105263	0.0869565	0.0714286	0.238095	0.363636	0.142857	0.0909091	0.25	0.153846
aciclovir	0.1	0.0952381	0.125	0.1875	0.285714	0.272727	0.0645161	0	0.210526	0.1	0.142857	1	0.157895	0.2	0.176471	0.166667	0.105263	0.111111	0.16	0.176471	0.105263	0.0555556	0.142857	0.0434783	0.111111	0.157895	0.172414	0.166667	0	0.125	0.0952381	0.117647	0.136364	0.16	0.307692	0.222222	0.176471	0.1	0.0666667	0.0555556	0.125	0.107143	0.235294	0.230769	0.235294	0.1	0	0.142857	0.105263
aconitine	0.047619	0.0952381	0.2	0.117647	0.285714	0	0.222222	0	0.277778	0.294118	0.0666667	0.157895	1	0.142857	0.176471	0.3125	0.166667	0.111111	0.16	0.111111	0.235294	0.1875	0.333333	0.0909091	0	0.294118	0.0967742	0.105263	0.166667	0.2	0.0952381	0.117647	0.0869565	0.318182	0	0.375	0.0526316	0.047619	0.230769	0.117647	0.285714	0.148148	0.166667	0.28	0.166667	0.222222	0.125	0.142857	0.235294
adenosine phosphate	0.0434783	0.0869565	0	0.4	0.111111	0.0666667	0.166667	0.0625	0.0416667	0.142857	0.125	0.2	0.142857	1	0.1	0.0952381	0.210526	0.157895	0.347826	0.157895	0.15	0.235294	0.166667	0.130435	0.294118	0	0.125	0.210526	0.0952381	0.111111	0.136364	0.05	0.125	0.192308	0.117647	0.263158	0.1	0.0434783	0.125	0.105263	0.0740741	0.03125	0.15	0.307692	0.210526	0.142857	0.0526316	0.125	0.4375
adiphenine	0.111111	0.05	0.230769	0.214286	0.454545	0.2	0.0333333	0.181818	0.166667	0.176471	0.166667	0.176471	0.176471	0.1	1	0.117647	0.117647	0.0588235	0.08	0.0588235	0.117647	0.133333	0.117647	0.1	0.2	0.176471	0	0.357143	0.117647	0.0666667	0.105263	0.307692	0.15	0.08	0.0714286	0.176471	0.285714	0.0526316	0.0769231	0.214286	0.25	0.16	0.117647	0.153846	0.266667	0.25	0.0666667	0.4	0.117647
adipiodone	0.05	0.157895	0.133333	0.125	0.133333	0.0833333	0.142857	0.0769231	0.222222	0.166667	0.153846	0.166667	0.3125	0.0952381	0.117647	1	0.176471	0.117647	0.217391	0.357143	0.176471	0.0588235	0.181818	0.0454545	0.117647	0.235294	0.137931	0.0526316	0.25	0.214286	0.1	0.0588235	0.0909091	0.166667	0.142857	0.235294	0.117647	0.05	0.153846	0.125	0.238095	0.111111	0.176471	0.24	0.25	0.166667	0.307692	0.153846	0.25
adrenosterone	0	0	0.0625	0.125	0.0625	0	0.103448	0.0769231	0.157895	0.4	0.0714286	0.105263	0.166667	0.210526	0.117647	0.176471	1	0.117647	0.0769231	0.0555556	0.176471	0.0588235	0.181818	0.15	0.1875	0.3125	0.178571	0.176471	0.176471	0.214286	0.047619	0.384615	0.0909091	0.12	0.0666667	0.3125	0.0555556	0.05	0	0.125	0.130435	0.2	0.176471	0.24	0.111111	0.105263	0.0625	0.0714286	0.176471
AG-012559	0.176471	0.105263	0.0666667	0.133333	0.230769	0	0.24	0.181818	0.105263	0	0.166667	0.111111	0.111111	0.157895	0.0588235	0.117647	0.117647	1	0.173913	0.2	0.461538	0.214286	0.310345	0.1	0.2	0.176471	0.230769	0.117647	0.1875	0.230769	0.166667	0.133333	0.210526	0.227273	0.0714286	0.111111	0.125	0.0526316	0.272727	0.307692	0.136364	0.208333	0.1875	0.304348	0.266667	0.111111	0.230769	0.166667	0.1875
AG-013608	0.208333	0.25	0	0.181818	0.136364	0.105263	0.333333	0.1	0.153846	0.16	0.15	0.16	0.16	0.347826	0.08	0.217391	0.0769231	0.173913	1	0.173913	0.0769231	0.238095	0.342857	0.192308	0.125	0.0740741	0.322581	0.12	0.217391	0.190476	0.2	0	0.28	0.285714	0.2	0.0740741	0.08	0.208333	0.15	0.0833333	0.133333	0.117647	0.166667	0.344828	0.166667	0.16	0.190476	0.15	0.272727
AG-028671	0.176471	0.105263	0.0666667	0.133333	0.0666667	0	0.148148	0	0.105263	0	0.0769231	0.176471	0.111111	0.157895	0.0588235	0.357143	0.0555556	0.2	0.173913	1	0.117647	0.0625	0.1875	0.1	0.2	0.176471	0.185185	0	0.0555556	0.0666667	0.166667	0.0625	0.277778	0.125	0.0714286	0.111111	0.285714	0.0526316	0.0769231	0.214286	0.25	0.16	0.117647	0.153846	0.1875	0.25	0.142857	0.166667	0.1875
AH-23848	0	0	0.133333	0.125	0.214286	0.0833333	0.230769	0.166667	0.222222	0.05	0.25	0.105263	0.235294	0.15	0.117647	0.176471	0.176471	0.461538	0.0769231	0.117647	1	0.384615	0.344828	0.15	0.1875	0.166667	0.1	0.25	0.176471	0.133333	0.1	0.2	0.142857	0.272727	0	0.235294	0.117647	0	0.25	0.2	0.181818	0.2	0.176471	0.291667	0.25	0.166667	0.133333	0.0714286	0.25
AH-6809	0	0	0.0714286	0.142857	0.153846	0.1	0.2	0.2	0.176471	0.117647	0.181818	0.0555556	0.1875	0.235294	0.133333	0.0588235	0.0588235	0.214286	0.238095	0.0625	0.384615	1	0.275862	0.166667	0.133333	0.0555556	0.0689655	0.125	0.125	0.153846	0.111111	0.0666667	0.157895	0.3	0	0.117647	0.0625	0	0.3	0.142857	0.0909091	0.0769231	0.285714	0.26087	0.125	0.117647	0.0714286	0.0833333	0.285714
ajmaline	0.142857	0.205882	0.16129	0.121212	0.16129	0.0322581	0.59375	0.0645161	0.28125	0.212121	0.0967742	0.142857	0.333333	0.166667	0.117647	0.181818	0.181818	0.310345	0.342857	0.1875	0.344828	0.275862	1	0.2	0.151515	0.212121	0.405405	0.147059	0.21875	0.2	0.205882	0.233333	0.264706	0.46875	0.0606061	0.25	0.0857143	0.212121	0.172414	0.193548	0.323529	0.484848	0.181818	0.515152	0.181818	0.212121	0.16129	0.0967742	0.258065
albendazole	0.2	0.0869565	0.0526316	0.105263	0	0	0.25	0.214286	0.25	0.263158	0.125	0.0434783	0.0909091	0.130435	0.1	0.0454545	0.15	0.1	0.192308	0.1	0.15	0.166667	0.2	1	0.1	0.142857	0.241379	0.0952381	0.0952381	0.25	0.190476	0.105263	0.173913	0.148148	0.0555556	0.142857	0.1	0.0909091	0.125	0.05	0.26087	0.222222	0.15	0.214286	0.15	0.0909091	0.0526316	0.0588235	0.0454545
alclometasone	0.111111	0.05	0.142857	0.214286	0.142857	0.0909091	0.107143	0.0833333	0.05	0	0.0769231	0.111111	0	0.294118	0.2	0.117647	0.1875	0.2	0.125	0.2	0.1875	0.133333	0.151515	0.1	1	0.0526316	0.142857	0.1875	0.266667	0.0666667	0.235294	0.214286	0.210526	0.08	0	0.111111	0.2	0.0526316	0.0769231	0.214286	0.25	0.115385	0.0555556	0.2	0.1875	0.111111	0.142857	0.166667	0.1875
alcuronium chloride	0.157895	0.0454545	0.125	0.0555556	0.2	0	0.178571	0.153846	0.352941	0.375	0.0666667	0.157895	0.294118	0	0.176471	0.235294	0.3125	0.176471	0.0740741	0.176471	0.166667	0.0555556	0.212121	0.142857	0.0526316	1	0.172414	0.166667	0.166667	0.2	0.0952381	0.1875	0.0869565	0.26087	0.133333	0.157895	0.25	0	0.142857	0.266667	0.227273	0.192308	0.166667	0.142857	0.105263	0.047619	0.125	0.142857	0.05
alexidine	0.259259	0.25	0.153846	0.0333333	0.0714286	0.04	0.323529	0.08	0.166667	0.0967742	0.0769231	0.172414	0.0967742	0.125	0	0.137931	0.178571	0.230769	0.322581	0.185185	0.1	0.0689655	0.405405	0.241379	0.142857	0.172414	1	0.1	0.178571	0.111111	0.296296	0.107143	0.321429	0.171429	0.208333	0.030303	0.142857	0.214286	0.0769231	0.148148	0.21875	0.30303	0.178571	0.294118	0.137931	0.133333	0.153846	0.037037	0.1
alfadolone	0.05	0	0.133333	0.2	0.214286	0.181818	0.0666667	0.166667	0.1	0.235294	0.153846	0.166667	0.105263	0.210526	0.357143	0.0526316	0.176471	0.117647	0.12	0	0.25	0.125	0.147059	0.0952381	0.1875	0.166667	0.1	1	0.176471	0	0.157895	0.2	0.142857	0.217391	0.142857	0.105263	0.117647	0	0.0714286	0.2	0.130435	0.153846	0.0526316	0.24	0.176471	0.166667	0	0.25	0.111111
alfaxalone	0.05	0.047619	0.214286	0	0.214286	0	0.185185	0.166667	0.1	0.166667	0.153846	0	0.166667	0.0952381	0.117647	0.25	0.176471	0.1875	0.217391	0.0555556	0.176471	0.125	0.21875	0.0952381	0.266667	0.166667	0.178571	0.176471	1	0.133333	0.1	0	0.0909091	0.166667	0.0666667	0.105263	0.0555556	0.166667	0.0714286	0.2	0.3	0.153846	0.25	0.24	0.111111	0.105263	0.545455	0.0714286	0.0526316
alfuzosin	0.0588235	0.117647	0	0.0714286	0.166667	0	0.208333	0.222222	0.357143	0.285714	0.2	0.125	0.2	0.111111	0.0666667	0.214286	0.214286	0.230769	0.190476	0.0666667	0.133333	0.153846	0.2	0.25	0.0666667	0.2	0.111111	0	0.133333	1	0.1875	0.153846	0.05	0.190476	0.0833333	0.125	0	0	0.333333	0	0.15	0.173913	0.133333	0.272727	0.214286	0	0.0769231	0.0909091	0.133333
alimemazine	0.277778	0.263158	0.0555556	0	0.117647	0.0714286	0.259259	0.0666667	0.263158	0.0952381	0.0625	0.0952381	0.0952381	0.136364	0.105263	0.1	0.047619	0.166667	0.2	0.166667	0.1	0.111111	0.205882	0.190476	0.235294	0.0952381	0.296296	0.157895	0.1	0.1875	1	0.111111	0.3	0.2	0.0588235	0	0.166667	0.0952381	0.214286	0	0.217391	0.142857	0.047619	0.137931	0.1	0.0454545	0.0555556	0.0625	0.1
allantoin	0	0	0.25	0.230769	0.153846	0.1	0.111111	0	0.176471	0.1875	0	0.117647	0.117647	0.05	0.307692	0.0588235	0.384615	0.133333	0	0.0625	0.2	0.0666667	0.233333	0.105263	0.214286	0.1875	0.107143	0.2	0	0.153846	0.111111	1	0.1	0.0833333	0.0769231	0.266667	0.133333	0	0	0.142857	0.2	0.217391	0.0588235	0.208333	0.125	0.1875	0	0.181818	0.2
alpha-ergocryptine	0.388889	0.181818	0.105263	0	0.166667	0.0625	0.0909091	0.0588235	0.130435	0.0416667	0.0555556	0.136364	0.0869565	0.125	0.15	0.0909091	0.0909091	0.210526	0.28	0.277778	0.142857	0.157895	0.264706	0.173913	0.210526	0.0869565	0.321429	0.142857	0.0909091	0.05	0.3	0.1	1	0.230769	0.0526316	0	0.210526	0.0869565	0.117647	0.222222	0.111111	0.214286	0.142857	0.166667	0.0909091	0.136364	0.05	0.117647	0.0909091
alpha-estradiol	0.16	0.111111	0	0.0833333	0.0869565	0	0.37931	0.157895	0.304348	0.26087	0.15	0.16	0.318182	0.192308	0.08	0.166667	0.12	0.227273	0.285714	0.125	0.272727	0.3	0.46875	0.148148	0.08	0.26087	0.171429	0.217391	0.166667	0.190476	0.2	0.0833333	0.230769	1	0.0909091	0.16	0.08	0.0740741	0.277778	0.238095	0.259259	0.225806	0.12	0.392857	0.166667	0.16	0.0416667	0.0952381	0.272727
alpha-yohimbine	0.0625	0.0588235	0	0.166667	0.0833333	0.285714	0.037037	0.111111	0.0588235	0.0625	0.222222	0.307692	0	0.117647	0.0714286	0.142857	0.0666667	0.0714286	0.2	0.0714286	0	0	0.0606061	0.0555556	0	0.133333	0.208333	0.142857	0.0666667	0.0833333	0.0588235	0.0769231	0.0526316	0.0909091	1	0	0.153846	0	0	0.0769231	0.047619	0.04	0.142857	0.173913	0.142857	0	0.0833333	0.1	0.142857
alprenolol	0	0	0.2	0.357143	0.125	0	0.178571	0	0.15	0.294118	0.0666667	0.222222	0.375	0.263158	0.176471	0.235294	0.3125	0.111111	0.0740741	0.111111	0.235294	0.117647	0.25	0.142857	0.111111	0.157895	0.030303	0.105263	0.105263	0.125	0	0.266667	0	0.16	0	1	0	0.1	0	0.0555556	0.285714	0.24	0.166667	0.333333	0.166667	0.222222	0.125	0.0666667	0.235294
alprostadil	0.25	0.166667	0.142857	0.0625	0.142857	0.2	0.0689655	0.0833333	0.105263	0.0526316	0	0.176471	0.0526316	0.1	0.285714	0.117647	0.0555556	0.125	0.08	0.285714	0.117647	0.0625	0.0857143	0.1	0.2	0.25	0.142857	0.117647	0.0555556	0	0.166667	0.133333	0.210526	0.08	0.153846	0	1	0	0	0.307692	0.190476	0.115385	0.1875	0	0.0555556	0.111111	0.0666667	0.0769231	0.0555556
alsterpaullone	0.222222	0.277778	0.125	0	0.0588235	0	0.269231	0	0.0454545	0.047619	0	0.1	0.047619	0.0434783	0.0526316	0.05	0.05	0.0526316	0.208333	0.0526316	0	0	0.212121	0.0909091	0.0526316	0	0.214286	0	0.166667	0	0.0952381	0	0.0869565	0.0740741	0	0.1	0	1	0	0	0.125	0.192308	0.166667	0.0322581	0.05	0.222222	0.2	0	0
altizide	0.0666667	0.133333	0	0	0.2	0	0.173913	0.285714	0.307692	0.0666667	0.25	0.0666667	0.230769	0.125	0.0769231	0.153846	0	0.272727	0.15	0.0769231	0.25	0.3	0.172414	0.125	0.0769231	0.142857	0.0769231	0.0714286	0.0714286	0.333333	0.214286	0	0.117647	0.277778	0	0	0	0	1	0.0833333	0.05	0.0416667	0	0.130435	0.25	0.0666667	0	0.25	0.153846
altretamine	0.117647	0	0.153846	0.142857	0.153846	0	0.111111	0.2	0.0526316	0.0555556	0.0833333	0.0555556	0.117647	0.105263	0.214286	0.125	0.125	0.307692	0.0833333	0.214286	0.2	0.142857	0.193548	0.05	0.214286	0.266667	0.148148	0.2	0.2	0	0	0.142857	0.222222	0.238095	0.0769231	0.0555556	0.307692	0	0.0833333	1	0.2	0.166667	0.125	0.16	0.125	0.266667	0.153846	0.181818	0.2
alverine	0.125	0.037037	0.210526	0.142857	0.15	0	0.266667	0.111111	0.166667	0.227273	0.105263	0.125	0.285714	0.0740741	0.25	0.238095	0.130435	0.136364	0.133333	0.25	0.181818	0.0909091	0.323529	0.26087	0.25	0.227273	0.21875	0.130435	0.3	0.15	0.217391	0.2	0.111111	0.259259	0.047619	0.285714	0.190476	0.125	0.05	0.2	1	0.384615	0.130435	0.37037	0.181818	0.227273	0.210526	0.105263	0.130435
alvespimycin	0.192308	0.142857	0.125	0.0769231	0.0384615	0	0.3125	0.0909091	0.185185	0.24	0.0869565	0.107143	0.148148	0.03125	0.16	0.111111	0.2	0.208333	0.117647	0.16	0.2	0.0769231	0.484848	0.222222	0.115385	0.192308	0.30303	0.153846	0.153846	0.173913	0.142857	0.217391	0.214286	0.225806	0.04	0.24	0.115385	0.192308	0.0416667	0.166667	0.384615	1	0.0714286	0.322581	0.111111	0.192308	0.08	0.0416667	0.0714286
amantadine	0.05	0	0.307692	0.0588235	0.214286	0.0833333	0.103448	0.0769231	0.1	0.235294	0.0714286	0.235294	0.166667	0.15	0.117647	0.176471	0.176471	0.1875	0.166667	0.117647	0.176471	0.285714	0.181818	0.15	0.0555556	0.166667	0.178571	0.0526316	0.25	0.133333	0.047619	0.0588235	0.142857	0.12	0.142857	0.166667	0.1875	0.166667	0	0.125	0.130435	0.0714286	1	0.148148	0.0526316	0.105263	0.307692	0	0.111111
ambroxol	0.0666667	0.1	0.0769231	0.318182	0.166667	0.0434783	0.30303	0.136364	0.178571	0.230769	0.238095	0.230769	0.28	0.307692	0.153846	0.24	0.24	0.304348	0.344828	0.153846	0.291667	0.26087	0.515152	0.214286	0.2	0.142857	0.294118	0.24	0.24	0.272727	0.137931	0.208333	0.166667	0.392857	0.173913	0.333333	0	0.0322581	0.130435	0.16	0.37037	0.322581	0.148148	1	0.347826	0.185185	0.166667	0.181818	0.347826
amikacin	0.05	0.1	0.0625	0.285714	0.307692	0.0833333	0.185185	0.166667	0.157895	0	0.363636	0.235294	0.166667	0.210526	0.266667	0.25	0.111111	0.266667	0.166667	0.1875	0.25	0.125	0.181818	0.15	0.1875	0.105263	0.137931	0.176471	0.111111	0.214286	0.1	0.125	0.0909091	0.166667	0.142857	0.166667	0.0555556	0.05	0.25	0.125	0.181818	0.111111	0.0526316	0.347826	1	0.235294	0.0625	0.363636	0.333333
amiloride	0	0.0952381	0.2	0.1875	0.125	0	0.137931	0.0714286	0.0454545	0.047619	0.142857	0.1	0.222222	0.142857	0.25	0.166667	0.105263	0.111111	0.16	0.25	0.166667	0.117647	0.212121	0.0909091	0.111111	0.047619	0.133333	0.166667	0.105263	0	0.0454545	0.1875	0.136364	0.16	0	0.222222	0.111111	0.222222	0.0666667	0.266667	0.227273	0.192308	0.105263	0.185185	0.235294	1	0.0588235	0.230769	0.235294
aminocaproic acid	0.0588235	0.0555556	0.272727	0.0714286	0.166667	0	0.16	0.1	0.117647	0.0588235	0.0909091	0	0.125	0.0526316	0.0666667	0.307692	0.0625	0.230769	0.190476	0.142857	0.133333	0.0714286	0.16129	0.0526316	0.142857	0.125	0.153846	0	0.545455	0.0769231	0.0555556	0	0.05	0.0416667	0.0833333	0.125	0.0666667	0.2	0	0.153846	0.210526	0.08	0.307692	0.166667	0.0625	0.0588235	1	0	0.0625
aminoglutethimide	0.0666667	0.0625	0.0909091	0.3	0.333333	0.142857	0.0384615	0.125	0.0625	0.0666667	0.25	0.142857	0.142857	0.125	0.4	0.153846	0.0714286	0.166667	0.15	0.166667	0.0714286	0.0833333	0.0967742	0.0588235	0.166667	0.142857	0.037037	0.25	0.0714286	0.0909091	0.0625	0.181818	0.117647	0.0952381	0.1	0.0666667	0.0769231	0	0.25	0.181818	0.105263	0.0416667	0	0.181818	0.363636	0.230769	0	1	0.153846
aminohippuric acid	0	0.047619	0	0.384615	0.0625	0	0.230769	0.0769231	0.1	0.105263	0.153846	0.105263	0.235294	0.4375	0.117647	0.25	0.176471	0.1875	0.272727	0.1875	0.25	0.285714	0.258065	0.0454545	0.1875	0.05	0.1	0.111111	0.0526316	0.133333	0.1	0.2	0.0909091	0.272727	0.142857	0.235294	0.0555556	0	0.153846	0.2	0.130435	0.0714286	0.111111	0.347826	0.333333	0.235294	0.0625	0.153846	1
aminophenazone	0	0	0.0833333	0.166667	0	0	0.037037	0.25	0.125	0.214286	0.222222	0	0.0625	0	0.153846	0.142857	0.230769	0.153846	0.0434783	0.0714286	0.142857	0.0769231	0.09375	0.1875	0.0714286	0.214286	0.115385	0.230769	0.0666667	0.181818	0.125	0.272727	0.0526316	0.142857	0.0909091	0.0625	0.0714286	0	0.1	0.166667	0.157895	0.130435	0.0666667	0.173913	0.142857	0.214286	0.0833333	0.222222	0.0666667
aminophylline	0	0	0.4	0.25	0.0769231	0	0.0357143	0	0.0555556	0.125	0	0.0588235	0.125	0.0526316	0.230769	0.214286	0.214286	0.0666667	0	0.142857	0.0625	0	0.125	0.0526316	0.230769	0.125	0.111111	0.133333	0.133333	0	0	0.363636	0.105263	0.0869565	0	0.285714	0.0666667	0.0588235	0	0.25	0.277778	0.173913	0.0625	0.166667	0.133333	0.285714	0.166667	0.2	0.0625
amiodarone	0.28	0.269231	0.12	0.0740741	0.166667	0.0434783	0.387097	0.0869565	0.178571	0.142857	0.0833333	0.0666667	0.103448	0.133333	0.111111	0.107143	0.0689655	0.2	0.444444	0.153846	0.148148	0.16	0.351351	0.307692	0.2	0.142857	0.333333	0.192308	0.291667	0.12	0.32	0.0740741	0.296296	0.181818	0.0384615	0.0666667	0.111111	0.230769	0.0833333	0.0740741	0.193548	0.171429	0.192308	0.235294	0.107143	0.142857	0.217391	0.130435	0.0689655
amiprilose	0	0	0.0666667	0.307692	0.142857	0.0909091	0.0689655	0.181818	0.105263	0.111111	0.4	0.176471	0.111111	0.157895	0.285714	0.117647	0.117647	0.2	0.125	0.125	0.266667	0.133333	0.151515	0.1	0.125	0.111111	0.103448	0.461538	0.0555556	0.0666667	0.105263	0.214286	0.0952381	0.227273	0.153846	0.111111	0.0588235	0	0.166667	0.214286	0.190476	0.16	0	0.304348	0.461538	0.333333	0	0.4	0.266667
amitriptyline	0.333333	0.208333	0.142857	0.0416667	0.142857	0.0526316	0.258065	0.166667	0.16	0.0769231	0.1	0.037037	0.0769231	0.111111	0.3	0.0384615	0.08	0.130435	0.129032	0.0833333	0.173913	0.136364	0.243243	0.363636	0.181818	0.037037	0.333333	0.285714	0.125	0.0434783	0.380952	0.190476	0.347826	0.166667	0.0454545	0.0769231	0.181818	0.166667	0.1	0.136364	0.269231	0.233333	0.08	0.1875	0.173913	0.217391	0.0434783	0.1	0.08
amodiaquine	0.05	0.1	0.0625	0.0588235	0.0625	0	0.142857	0	0.047619	0.166667	0	0.235294	0.105263	0.277778	0	0.0526316	0.176471	0.0555556	0.12	0.1875	0	0.0588235	0.114286	0.0952381	0.117647	0.105263	0.222222	0.111111	0.0526316	0.0625	0.294118	0.0588235	0.142857	0.217391	0.0666667	0.105263	0.0555556	0.166667	0.0714286	0	0.130435	0.0344828	0.176471	0.148148	0.0526316	0.166667	0	0.0714286	0.111111
amoxapine	0.35	0.333333	0.0454545	0.0434783	0.0952381	0	0.461538	0.111111	0.333333	0.227273	0.05	0.08	0.125	0.115385	0.136364	0.0833333	0.181818	0.190476	0.214286	0.0869565	0.0833333	0.0909091	0.323529	0.380952	0.136364	0.173913	0.344828	0.0833333	0.130435	0.352941	0.4	0.142857	0.2	0.172414	0	0.125	0.0869565	0.125	0.166667	0.0434783	0.230769	0.384615	0.04	0.233333	0.181818	0.0384615	0.0454545	0.05	0.0833333
amoxicillin	0.105263	0.047619	0.133333	0.2	0.133333	0	0.185185	0.166667	0.157895	0.166667	0.0714286	0.105263	0.166667	0.210526	0.117647	0.333333	0.176471	0.1875	0.272727	0.266667	0.111111	0.125	0.181818	0.210526	0.117647	0.166667	0.222222	0.111111	0.176471	0.214286	0.1	0.0588235	0.2	0.12	0.142857	0.166667	0.0555556	0.105263	0.0714286	0.125	0.181818	0.153846	0.25	0.291667	0.25	0.105263	0.307692	0.0714286	0.25
amphotericin B	0.2	0.190476	0	0.05	0.0526316	0	0.296296	0.0625	0.136364	0.142857	0.0588235	0.142857	0.0909091	0.181818	0	0.0952381	0.210526	0.375	0.148148	0.1	0.15	0.05	0.272727	0.130435	0.157895	0.142857	0.241379	0.15	0.0952381	0.25	0.388889	0.166667	0.173913	0.347826	0.117647	0.0909091	0.047619	0.142857	0.2	0.105263	0.115385	0.222222	0.0952381	0.214286	0.15	0.0434783	0.0526316	0.0588235	0.15
ampicillin	0.0666667	0.0625	0.0909091	0	0	0.142857	0	0.125	0.0625	0.142857	0.111111	0.230769	0	0	0	0.153846	0.0714286	0.0769231	0.0952381	0.0769231	0	0	0.030303	0.0588235	0	0.230769	0.166667	0.0714286	0.0714286	0.0909091	0.0625	0	0.0555556	0.0952381	0.375	0	0.166667	0.0666667	0	0.0833333	0	0.0416667	0.25	0.04	0	0.0666667	0.0909091	0	0
amprolium	0.037037	0.115385	0.0909091	0.315789	0.263158	0.0526316	0.3	0.105263	0.208333	0.217391	0.222222	0.166667	0.4	0.25	0.3	0.35	0.227273	0.3	0.25	0.181818	0.35	0.25	0.4375	0.2	0.130435	0.166667	0.111111	0.227273	0.173913	0.333333	0.115385	0.25	0.107143	0.346154	0.0454545	0.4	0.04	0.037037	0.222222	0.190476	0.32	0.275862	0.125	0.583333	0.5	0.333333	0.0909091	0.294118	0.35
ampyrone	0.130435	0.08	0.157895	0.0454545	0.375	0.0588235	0.321429	0.1875	0.421053	0.238095	0.176471	0.181818	0.368421	0.12	0.263158	0.25	0.136364	0.263158	0.32	0.142857	0.315789	0.352941	0.375	0.166667	0.142857	0.3	0.151515	0.136364	0.388889	0.222222	0.125	0.0952381	0.16	0.32	0.05	0.181818	0.142857	0.130435	0.176471	0.15	0.291667	0.166667	0.388889	0.333333	0.190476	0.130435	0.375	0.111111	0.190476
amrinone	0.157895	0.352941	0	0.117647	0.0588235	0.0769231	0.269231	0.153846	0.210526	0.157895	0.0666667	0.1	0.157895	0.142857	0.111111	0.235294	0.05	0.176471	0.26087	0.176471	0.05	0.117647	0.176471	0.0909091	0.111111	0.222222	0.172414	0.105263	0.05	0.2	0.277778	0.0555556	0.0416667	0.26087	0.0625	0.047619	0.25	0.1	0.230769	0.1875	0.173913	0.148148	0	0.142857	0.166667	0.222222	0.0588235	0.142857	0.166667
amylocaine	0.263158	0.25	0.0526316	0	0.176471	0	0.346154	0.133333	0.388889	0.0909091	0.2	0.142857	0.263158	0.0833333	0.1	0.210526	0	0.294118	0.291667	0.157895	0.210526	0.235294	0.354839	0.181818	0.1	0.142857	0.16129	0.0454545	0.277778	0.25	0.25	0	0.227273	0.47619	0.0555556	0.0909091	0.047619	0.2	0.384615	0.105263	0.208333	0.178571	0.15	0.214286	0.277778	0.142857	0.176471	0.125	0.15
anabasine	0	0	0	0.333333	0.1	0.166667	0	0	0	0.0714286	0.125	0.25	0.0714286	0.214286	0.0833333	0.0769231	0.0769231	0	0.1	0	0.0769231	0	0.03125	0	0.0833333	0.0714286	0.0384615	0.272727	0.0769231	0	0	0	0	0.1	0.25	0.153846	0	0	0	0	0.111111	0.0434783	0	0.190476	0.166667	0	0	0.125	0.0769231
androsterone	0.047619	0.0454545	0.2	0.117647	0.0588235	0	0.137931	0.153846	0.210526	0.294118	0.0666667	0.1	0.157895	0.263158	0.111111	0.235294	0.3125	0.0526316	0.16	0.0526316	0.05	0.0555556	0.142857	0.0909091	0.176471	0.157895	0.259259	0.235294	0.235294	0.125	0.0952381	0.117647	0.136364	0.208333	0.133333	0.157895	0.0526316	0.047619	0.0666667	0.1875	0.173913	0.148148	0.166667	0.230769	0.105263	0.1	0.2	0	0.166667
anisomycin	0.133333	0.166667	0.153846	0.107143	0.111111	0	0.40625	0.125	0.296296	0.214286	0.12	0.0967742	0.259259	0.241379	0.103448	0.178571	0.178571	0.230769	0.171429	0.185185	0.375	0.24	0.529412	0.285714	0.142857	0.214286	0.314286	0.137931	0.178571	0.2	0.129032	0.148148	0.15625	0.322581	0	0.259259	0.142857	0.0967742	0.166667	0.24	0.3	0.387097	0.137931	0.375	0.178571	0.214286	0.111111	0.037037	0.222222
antazoline	0	0	0.142857	0.133333	0.0666667	0	0.0689655	0.0833333	0.105263	0.333333	0.0769231	0.0526316	0.176471	0.047619	0.125	0.1875	0.357143	0.125	0.08	0.125	0.1875	0	0.225806	0.222222	0.125	0.25	0.142857	0.266667	0.1875	0.230769	0.105263	0.307692	0.15	0.125	0.0714286	0.25	0	0.0526316	0	0.133333	0.25	0.318182	0.0555556	0.304348	0.0555556	0.176471	0.142857	0.0769231	0.0555556
antimycin A	0.222222	0.307692	0.16	0.0344828	0.0357143	0.0416667	0.419355	0.0833333	0.259259	0.222222	0.08	0.0645161	0.0645161	0.09375	0.0689655	0.103448	0.185185	0.107143	0.290323	0.0689655	0.103448	0.111111	0.416667	0.346154	0.148148	0.0645161	0.40625	0.142857	0.230769	0.16	0.259259	0.153846	0.241379	0.176471	0.037037	0.1	0.0333333	0.32	0.08	0.0714286	0.1875	0.354839	0.142857	0.228571	0.0666667	0.137931	0.16	0.0384615	0.0322581
apigenin	0.3	0.588235	0.157895	0.0454545	0.047619	0.0588235	0.275862	0	0.08	0.0833333	0	0.130435	0.04	0.0769231	0.0909091	0.0869565	0.0416667	0.0434783	0.222222	0.0434783	0	0.0454545	0.189189	0.12	0.0434783	0.04	0.310345	0.0416667	0.136364	0.047619	0.125	0.0454545	0.115385	0.0645161	0.105263	0.0833333	0.142857	0.368421	0	0	0.107143	0.206897	0.136364	0.125	0.136364	0.181818	0.1	0	0.0416667
apomorphine	0.318182	0.304348	0.0869565	0.04	0.136364	0.05	0.333333	0.047619	0.2	0.16	0.0454545	0.16	0.16	0.192308	0.173913	0.166667	0.12	0.125	0.285714	0.173913	0.12	0.130435	0.236842	0.107143	0.125	0.115385	0.171429	0.166667	0.166667	0.0416667	0.25	0.04	0.230769	0.241379	0	0.16	0.173913	0.318182	0.0454545	0.04	0.133333	0.151515	0.217391	0.147059	0.12	0.16	0.190476	0.0454545	0.12
apramycin	0.0384615	0.0769231	0.15	0.263158	0.15	0	0.357143	0.111111	0.166667	0.227273	0.166667	0.125	0.285714	0.208333	0.136364	0.130435	0.238095	0.388889	0.214286	0.0869565	0.444444	0.263158	0.5	0.208333	0.136364	0.173913	0.21875	0.238095	0.238095	0.210526	0.0769231	0.263158	0.0714286	0.259259	0.047619	0.421053	0.0416667	0.0384615	0.105263	0.2	0.333333	0.384615	0.130435	0.608696	0.3	0.227273	0.15	0.105263	0.3
AR-A014418	0.0588235	0.117647	0.0769231	0.25	0.0769231	0.111111	0.115385	0	0	0.0588235	0.0909091	0.2	0	0.176471	0.0666667	0.0625	0	0.0666667	0.190476	0.0666667	0.0625	0.0714286	0.0909091	0	0	0.0588235	0.153846	0.214286	0	0	0.0555556	0	0	0.0416667	0.181818	0.0588235	0	0.2	0	0	0	0.08	0.133333	0.12	0.133333	0.125	0.0769231	0.0909091	0.133333
arachidonic acid	0.0952381	0.0909091	0.117647	0.111111	0.357143	0.0714286	0.172414	0.0666667	0.2	0.210526	0.214286	0.352941	0.4375	0.136364	0.166667	0.294118	0.222222	0.166667	0.153846	0.166667	0.157895	0.0526316	0.242424	0.136364	0	0.352941	0.166667	0.1	0.222222	0.1875	0.0434783	0.0526316	0.0833333	0.2	0.2	0.352941	0.105263	0.0952381	0.0625	0.176471	0.217391	0.142857	0.294118	0.32	0.294118	0.15	0.1875	0.133333	0.1
arachidonyltrifluoromethane	0.208333	0.111111	0.0416667	0.181818	0.0869565	0.105263	0.111111	0.1	0.0714286	0.16	0.15	0.318182	0.115385	0.24	0.173913	0.166667	0.0769231	0.125	0.241379	0.125	0.12	0.0833333	0.175	0.107143	0.173913	0.16	0.171429	0.272727	0.166667	0	0.111111	0	0.230769	0.285714	0.2	0.208333	0.173913	0.0740741	0.0454545	0.238095	0.214286	0.310345	0.0769231	0.3	0.166667	0.115385	0.0869565	0.0952381	0.166667
arcaine	0.0869565	0.04	0.235294	0.222222	0.3125	0.133333	0.2	0.0588235	0.181818	0.0416667	0.1875	0.25	0.25	0.173913	0.277778	0.142857	0.142857	0.277778	0.185185	0.15	0.333333	0.222222	0.30303	0.0384615	0.210526	0.25	0.193548	0.263158	0.2	0	0.0833333	0.222222	0.166667	0.230769	0.176471	0.190476	0.210526	0.0869565	0.117647	0.375	0.2	0.172414	0.2	0.25	0.333333	0.315789	0.166667	0.1875	0.263158
arecoline	0	0.05	0.142857	0.416667	0.230769	0.2	0.148148	0.0833333	0.05	0.0526316	0.166667	0.176471	0.176471	0.294118	0.125	0.266667	0.117647	0.2	0.285714	0.0588235	0.1875	0.133333	0.117647	0.1	0.0588235	0.111111	0.142857	0.117647	0.1875	0.142857	0	0.0625	0	0.0384615	0.363636	0.25	0.125	0.0526316	0	0.133333	0.0869565	0.0357143	0.266667	0.25	0.266667	0.111111	0.333333	0.0769231	0.266667
artemisinin	0.0526316	0	0.0666667	0.0625	0.142857	0.0909091	0.0689655	0.0833333	0.166667	0.428571	0	0.25	0.176471	0.157895	0.2	0.0555556	0.266667	0	0.08	0.0588235	0.117647	0.133333	0.151515	0.157895	0.125	0.25	0.0666667	0.266667	0.0555556	0.0666667	0.166667	0.133333	0.15	0.227273	0	0.25	0.125	0.111111	0	0.0625	0.25	0.16	0.1875	0.153846	0	0.0526316	0	0	0.0555556
articaine	0.125	0.0555556	0	0.153846	0	0	0.0740741	0	0	0.2	0	0.2	0.125	0.176471	0	0.0625	0.133333	0.142857	0.136364	0.0666667	0.0625	0.0714286	0.125	0.0526316	0.0666667	0.2	0.111111	0.214286	0.133333	0	0.117647	0	0.05	0.190476	0.181818	0.2	0.0666667	0.125	0	0.153846	0.0952381	0.125	0.133333	0.166667	0.0625	0.0588235	0.0769231	0	0.133333
ascorbic acid	0.0588235	0.117647	0.0769231	0.0714286	0.0769231	0.111111	0	0	0	0.0588235	0	0.0588235	0.0588235	0.0526316	0.142857	0.214286	0.0625	0	0.0869565	0.142857	0	0	0	0.0526316	0.0666667	0.125	0.0714286	0.0625	0.0625	0	0.0555556	0.0714286	0.05	0.0416667	0.0833333	0.0588235	0.230769	0.0588235	0	0.0714286	0.0952381	0.0384615	0.0625	0	0.133333	0.2	0.0769231	0.0909091	0.0625
asiaticoside	0.0526316	0	0.0666667	0.214286	0.142857	0.0909091	0.107143	0.181818	0.166667	0.333333	0.166667	0.111111	0.176471	0.157895	0.285714	0	0.266667	0.2	0.08	0	0.1875	0.133333	0.1875	0.222222	0.0588235	0.176471	0.103448	0.357143	0	0.230769	0.105263	0.307692	0.0952381	0.227273	0.0714286	0.176471	0.0588235	0	0.0769231	0.133333	0.190476	0.26087	0.0555556	0.304348	0.1875	0.111111	0	0.166667	0.117647
astemizole	0.333333	0.269231	0.12	0	0.037037	0.0434783	0.228571	0.0869565	0.178571	0.230769	0.04	0.142857	0.0666667	0.133333	0.111111	0.107143	0.24	0.0344828	0.21875	0.111111	0	0.0357143	0.219512	0.307692	0.153846	0.142857	0.517241	0.0689655	0.148148	0.0769231	0.222222	0.0740741	0.25	0.0540541	0.08	0.103448	0.153846	0.28	0	0.0740741	0.193548	0.322581	0.148148	0.166667	0.0333333	0.0666667	0.12	0	0.0333333
atovaquone	0.173913	0.272727	0.15	0.0909091	0.15	0	0.461538	0	0.272727	0.173913	0	0.0384615	0.35	0.115385	0.0416667	0.238095	0.0833333	0.190476	0.307692	0.0869565	0.181818	0.2	0.451613	0.115385	0.0416667	0.227273	0.258065	0.04	0.3	0.15	0.166667	0.0434783	0.0714286	0.259259	0	0.227273	0.0416667	0.285714	0.166667	0.0909091	0.185185	0.241379	0.181818	0.193548	0.0833333	0.125	0.277778	0.05	0.130435
atractyloside	0.1	0.0454545	0.125	0.1875	0.2	0.272727	0.03125	0.0714286	0.0952381	0.157895	0.0666667	0.375	0.1	0.142857	0.333333	0.235294	0.166667	0.0526316	0.115385	0.111111	0.105263	0.0555556	0.0810811	0.0909091	0.111111	0.222222	0.0967742	0.3125	0.105263	0	0.0454545	0.117647	0.136364	0.115385	0.307692	0.157895	0.333333	0.1	0	0.1875	0.173913	0.148148	0.235294	0.103448	0.235294	0.1	0.0588235	0.142857	0.105263
atracurium besilate	0.0588235	0	0.166667	0	0.272727	0.111111	0.115385	0.375	0.266667	0.0588235	0.333333	0.125	0.125	0.0526316	0.333333	0.133333	0	0.142857	0.0416667	0.0666667	0.307692	0.25	0.125	0.111111	0.142857	0.0588235	0.0344828	0.214286	0.133333	0.0769231	0.117647	0.0714286	0.105263	0.190476	0	0.125	0.142857	0.0588235	0.2	0.153846	0.210526	0.173913	0.133333	0.12	0.307692	0.2	0.0769231	0.0909091	0.133333
atropine	0.26087	0.153846	0.0869565	0.04	0.25	0.05	0.37931	0.222222	0.428571	0.115385	0.210526	0.208333	0.26087	0.0689655	0.173913	0.12	0.12	0.35	0.241379	0.125	0.333333	0.238095	0.516129	0.148148	0.125	0.318182	0.28125	0.166667	0.217391	0.190476	0.153846	0.130435	0.230769	0.44	0.0909091	0.115385	0.173913	0.208333	0.210526	0.3	0.214286	0.310345	0.166667	0.3	0.166667	0.16	0.190476	0.0952381	0.12
atropine methonitrate	0.0526316	0	0.230769	0.0625	0.230769	0.0909091	0.107143	0.3	0.166667	0.25	0.166667	0.0526316	0.176471	0.047619	0.285714	0.0555556	0.117647	0.285714	0.0384615	0	0.461538	0.214286	0.225806	0.157895	0.125	0.25	0.103448	0.583333	0.1875	0.0666667	0.166667	0.214286	0.15	0.285714	0	0.111111	0.2	0	0.166667	0.307692	0.25	0.208333	0.117647	0.2	0.117647	0.176471	0.0666667	0.166667	0.0555556
atropine oxide	0.111111	0.05	0	0.133333	0.0666667	0.2	0.0689655	0.181818	0.166667	0.176471	0.272727	0.333333	0.111111	0.157895	0.125	0.1875	0.1875	0.125	0.227273	0.125	0.117647	0.0625	0.117647	0.1	0	0.176471	0.230769	0.266667	0.0555556	0.0666667	0	0.0625	0.15	0.227273	0.5	0.0526316	0.2	0	0	0.214286	0.0869565	0.16	0.1875	0.25	0.1875	0.111111	0.0666667	0.0769231	0.1875
azacitidine	0.315789	0.3	0.05	0	0.05	0.0625	0.285714	0.0588235	0.0833333	0.136364	0	0.0869565	0.0869565	0.08	0.0952381	0.0909091	0.0909091	0.0454545	0.28	0.0454545	0	0.047619	0.228571	0.227273	0.0454545	0.0416667	0.275862	0.0434783	0.142857	0	0.0833333	0	0.166667	0.142857	0.0526316	0.0869565	0.0952381	0.5625	0	0.047619	0.153846	0.172414	0.142857	0.09375	0.0909091	0.0869565	0.166667	0	0.0434783
azacyclonol	0.259259	0.206897	0.2	0.0689655	0.0344828	0	0.363636	0.0384615	0.129032	0.172414	0.037037	0.030303	0.133333	0.125	0.0666667	0.1	0.178571	0.142857	0.242424	0.142857	0.137931	0.148148	0.405405	0.333333	0.142857	0.133333	0.586207	0.1	0.222222	0.0714286	0.25	0.148148	0.275862	0.138889	0.0740741	0.0967742	0.103448	0.214286	0.037037	0.107143	0.258065	0.30303	0.222222	0.294118	0.03125	0.133333	0.2	0.037037	0.1
azaperone	0	0	0	0	0	0	0.08	0.125	0.0625	0.333333	0.111111	0	0.142857	0.0588235	0	0.0714286	0.153846	0.0769231	0.0952381	0	0.153846	0.3	0.133333	0.125	0	0.142857	0.0769231	0.153846	0.153846	0.2	0.133333	0	0.0555556	0.277778	0	0.0666667	0	0	0.111111	0	0.166667	0.136364	0.153846	0.181818	0.0714286	0	0	0	0.0714286
azapropazone	0.125	0.1875	0.272727	0	0.4	0.25	0.115385	0	0.117647	0.0588235	0	0.2	0.285714	0	0.142857	0.307692	0.0625	0.230769	0.136364	0.0666667	0.214286	0.0714286	0.16129	0	0.142857	0.2	0.153846	0.133333	0.307692	0.0769231	0.1875	0.0714286	0.105263	0.0869565	0.0833333	0.125	0.230769	0.125	0.0909091	0.0714286	0.210526	0.08	0.214286	0.12	0.133333	0.0588235	0.272727	0.0909091	0
azathioprine	0.285714	0.217391	0.0952381	0.0434783	0.0952381	0.0555556	0.151515	0	0.166667	0.08	0.05	0.285714	0.08	0.0357143	0.136364	0.130435	0.0833333	0.136364	0.172414	0.25	0.0833333	0.0434783	0.184211	0.16	0.136364	0.173913	0.258065	0.0833333	0.04	0.0454545	0.333333	0.0909091	0.363636	0.133333	0.047619	0.08	0.190476	0.227273	0.05	0.0909091	0.142857	0.285714	0.181818	0.0882353	0.130435	0.227273	0.0454545	0.105263	0.0833333
azlocillin	0.125	0.1875	0	0.0714286	0.0769231	0	0.318182	0	0.357143	0.0588235	0.0909091	0.125	0.384615	0.111111	0	0.214286	0	0.142857	0.25	0.142857	0.133333	0.153846	0.241379	0.0526316	0.0666667	0.125	0.0714286	0	0.133333	0.166667	0.1875	0	0.05	0.315789	0	0.125	0	0.125	0.333333	0.0714286	0.0952381	0.08	0	0.166667	0.133333	0.125	0.166667	0.0909091	0.214286
aztreonam	0	0	0.307692	0.125	0.214286	0.0833333	0.142857	0	0.222222	0.235294	0	0.105263	0.3125	0.0952381	0.266667	0.0526316	0.333333	0.117647	0.037037	0	0.25	0.2	0.3	0.15	0.117647	0.166667	0.137931	0.176471	0.0526316	0.133333	0.1	0.636364	0.142857	0.166667	0.0666667	0.3125	0.0555556	0.05	0.0714286	0.0588235	0.181818	0.2	0.176471	0.24	0.111111	0.166667	0.0625	0.0714286	0.176471
bacampicillin	0.05	0.047619	0.214286	0.0588235	0.133333	0.181818	0.0322581	0.166667	0.157895	0.235294	0.0714286	0.3125	0.05	0.0952381	0.1875	0.176471	0.111111	0	0.0769231	0	0.0526316	0.0588235	0.0263158	0.15	0.117647	0.166667	0.1	0.176471	0.111111	0.0625	0.1	0.0588235	0.0434783	0.12	0.142857	0.166667	0.1875	0.166667	0	0.0588235	0.130435	0.0714286	0.333333	0.0689655	0.0526316	0.105263	0.133333	0	0
bacitracin	0.0526316	0.166667	0.0666667	0.214286	0.142857	0.2	0.107143	0.0833333	0.166667	0.176471	0.166667	0.25	0.176471	0.294118	0.0588235	0.461538	0.117647	0.125	0.35	0.2	0.0555556	0.133333	0.151515	0.047619	0.125	0.111111	0.185185	0.0555556	0.117647	0.230769	0.105263	0	0.15	0.173913	0.25	0.111111	0.0588235	0	0.166667	0.0625	0.0869565	0.0357143	0.1875	0.304348	0.117647	0	0.230769	0.166667	0.1875
baclofen	0.130435	0.125	0.157895	0.0454545	0.1	0	0.37037	0.0555556	0.173913	0.04	0.111111	0.0833333	0.181818	0.0769231	0.0434783	0.0869565	0.0869565	0.263158	0.178571	0.142857	0.25	0.15	0.517241	0.0769231	0.142857	0.181818	0.310345	0.0869565	0.25	0	0.08	0.15	0.208333	0.375	0.105263	0.130435	0.0909091	0.181818	0.111111	0.352941	0.192308	0.25	0.0869565	0.285714	0.136364	0.181818	0.222222	0.0526316	0.190476
bambuterol	0.0666667	0	0.0909091	0	0.0909091	0.142857	0.125	0.285714	0.416667	0.142857	0.25	0.142857	0.0666667	0	0.166667	0.153846	0.0714286	0	0.0952381	0.0769231	0.153846	0.0833333	0.0967742	0.125	0.0769231	0.142857	0.037037	0.153846	0.153846	0.0909091	0.0625	0.0833333	0.0555556	0.15	0.1	0.0666667	0.166667	0.0666667	0	0.0833333	0.105263	0.0869565	0.153846	0.0833333	0.0714286	0.0666667	0.2	0	0.0714286
BAS-012416453	0.368421	0.227273	0	0.15	0.1	0.0588235	0.275862	0.1875	0.125	0.04	0.176471	0.130435	0	0.272727	0.142857	0	0.136364	0.333333	0.222222	0.0909091	0.190476	0.0952381	0.222222	0.272727	0.263158	0.0833333	0.310345	0.315789	0.136364	0.1	0.227273	0.0952381	0.26087	0.222222	0.166667	0.04	0.142857	0.130435	0.111111	0.210526	0.148148	0.206897	0.0416667	0.285714	0.315789	0.0833333	0.047619	0.111111	0.136364
BCB000038	0.111111	0.148148	0.181818	0.08	0.238095	0.047619	0.366667	0.0454545	0.24	0.153846	0.0909091	0.111111	0.428571	0.185185	0.12	0.318182	0.115385	0.272727	0.37037	0.166667	0.380952	0.35	0.6	0.0666667	0.166667	0.153846	0.2	0.16	0.380952	0.130435	0.148148	0.08	0.269231	0.48	0	0.2	0.0769231	0.2	0.2	0.227273	0.25	0.21875	0.26087	0.37931	0.16	0.2	0.3	0.0909091	0.26087
BCB000039	0.0714286	0.148148	0.181818	0.08	0.181818	0	0.366667	0.0952381	0.347826	0.25	0.142857	0.0714286	0.363636	0.185185	0.12	0.26087	0.16	0.166667	0.37037	0.12	0.208333	0.285714	0.5	0.142857	0.12	0.2	0.272727	0.0357143	0.380952	0.181818	0.107143	0.08	0.137931	0.275862	0.0416667	0.25	0.037037	0.2	0.142857	0.173913	0.25	0.258065	0.26087	0.333333	0.115385	0.2	0.368421	0.0434783	0.26087
BCB000040	0.0588235	0	0.166667	0	0.166667	0.111111	0.0357143	0.1	0.117647	0.285714	0.0909091	0.125	0.125	0.111111	0.142857	0.133333	0.214286	0	0.190476	0	0.0625	0.25	0.0909091	0.25	0.0666667	0.0588235	0.111111	0.0625	0.214286	0.166667	0.0555556	0.0714286	0.166667	0.0869565	0.0833333	0.125	0.0666667	0.125	0	0	0.0952381	0.0384615	0.545455	0.12	0.0625	0.0588235	0.166667	0	0.0625
beclometasone	0.190476	0.130435	0.105263	0.047619	0.166667	0	0.333333	0.2	0.368421	0.388889	0.1875	0.136364	0.315789	0.0384615	0.15	0.263158	0.333333	0.210526	0.230769	0.15	0.2	0.157895	0.34375	0.173913	0.0952381	0.470588	0.233333	0.0909091	0.263158	0.3125	0.130435	0.157895	0.12	0.333333	0.0526316	0.190476	0.15	0.0869565	0.117647	0.157895	0.428571	0.307692	0.2	0.346154	0.2	0.0869565	0.166667	0.117647	0.142857
bemegride	0.0555556	0.111111	0.0714286	0.0666667	0.25	0	0.2	0.0909091	0.25	0.117647	0.181818	0.117647	0.357143	0.105263	0.214286	0.384615	0.0588235	0.133333	0.181818	0.214286	0.2	0.230769	0.193548	0.105263	0.133333	0.1875	0.0333333	0.0588235	0.2	0.25	0.111111	0.0666667	0.1	0.3	0	0.117647	0.0625	0.0555556	0.444444	0.142857	0.2	0.0769231	0.125	0.16	0.384615	0.266667	0.0714286	0.3	0.285714
bendroflumethiazide	0.0952381	0.0909091	0.0555556	0.25	0.0555556	0.0714286	0.172414	0.142857	0.142857	0.210526	0.0625	0.210526	0.15	0.190476	0.166667	0.222222	0.047619	0.105263	0.2	0.105263	0.047619	0.176471	0.138889	0.136364	0.105263	0.210526	0.129032	0.157895	0.1	0.1875	0.142857	0.0526316	0.04	0.363636	0.2	0.15	0.235294	0.0454545	0.133333	0.25	0.272727	0.142857	0.157895	0.178571	0.222222	0.15	0.0555556	0.0625	0.222222
benfluorex	0.105263	0	0.214286	0.125	0.133333	0.181818	0.103448	0	0.1	0.05	0.153846	0.235294	0.105263	0.210526	0.117647	0.176471	0.0526316	0.0555556	0.217391	0.266667	0.176471	0.2	0.181818	0.0952381	0.1875	0	0.222222	0.111111	0.0526316	0	0.157895	0.125	0.263158	0.12	0.142857	0.105263	0.117647	0.05	0	0.0588235	0.181818	0.0714286	0.25	0.24	0.111111	0.105263	0.133333	0.0714286	0.25
benfotiamine	0.0454545	0	0.1875	0.176471	0.0555556	0	0.172414	0.0666667	0.142857	0.352941	0	0.0952381	0.277778	0.136364	0.166667	0.1	0.294118	0.05	0.153846	0.105263	0.1	0.111111	0.322581	0.136364	0.05	0.210526	0.25	0.294118	0.1	0.0555556	0.0909091	0.333333	0.181818	0.25	0.125	0.277778	0.05	0.0454545	0	0.25	0.333333	0.333333	0.047619	0.375	0.047619	0.210526	0.0555556	0.0625	0.222222
benperidol	0.137931	0.214286	0.16	0.111111	0.115385	0	0.517241	0	0.259259	0.269231	0.0384615	0.1	0.434783	0.166667	0.0689655	0.230769	0.230769	0.192308	0.290323	0.148148	0.230769	0.2	0.7	0.129032	0.107143	0.222222	0.323529	0.142857	0.28	0.16	0.133333	0.153846	0.16129	0.37931	0	0.269231	0.0333333	0.178571	0.125	0.153846	0.266667	0.354839	0.142857	0.433333	0.103448	0.137931	0.208333	0.08	0.185185
benserazide	0.0434783	0.0869565	0.111111	0.235294	0.428571	0.0666667	0.25	0.0625	0.190476	0.2	0.2	0.2	0.5	0.238095	0.294118	0.4375	0.15	0.222222	0.291667	0.222222	0.277778	0.235294	0.3125	0.04	0.1	0.263158	0.0588235	0.15	0.277778	0.25	0.0869565	0.105263	0.08	0.291667	0.0555556	0.333333	0.1	0.0434783	0.2	0.235294	0.318182	0.137931	0.210526	0.36	0.352941	0.263158	0.176471	0.285714	0.352941
benzamil	0.25	0.368421	0.05	0	0.05	0.0625	0.2	0	0.04	0.0869565	0	0.190476	0.0416667	0.125	0	0.0909091	0.0909091	0.15	0.28	0.210526	0.0434783	0	0.194444	0.227273	0.0952381	0.0869565	0.423077	0.0909091	0.0434783	0.05	0.238095	0.047619	0.217391	0.103448	0.0526316	0.0416667	0.15	0.315789	0.0555556	0.047619	0.111111	0.172414	0.0909091	0.129032	0.0909091	0.25	0.05	0.0555556	0
benzathine benzylpenicillin	0.0555556	0	0.25	0.230769	0.363636	0.222222	0.0714286	0.2	0.111111	0.1875	0.181818	0.1875	0.1875	0.166667	0.416667	0.0588235	0.0588235	0.133333	0.130435	0	0.285714	0.142857	0.15625	0.105263	0.133333	0.1875	0.0689655	0.636364	0.2	0	0.0526316	0.142857	0.1	0.130435	0.166667	0.117647	0.214286	0	0.0833333	0.230769	0.2	0.12	0.125	0.208333	0.2	0.117647	0.0714286	0.3	0.125
benzbromarone	0.105263	0.157895	0.0625	0	0.133333	0.181818	0.230769	0.0769231	0.375	0.166667	0.153846	0.3125	0.235294	0.0454545	0.0555556	0.25	0	0.1875	0.166667	0.1875	0.25	0.285714	0.258065	0.15	0.0555556	0.235294	0.137931	0.111111	0.0526316	0.307692	0.294118	0.0588235	0.142857	0.4	0.142857	0.05	0.1875	0	0.363636	0.0588235	0.130435	0.153846	0.176471	0.148148	0.176471	0.05	0	0.0714286	0.111111
benzethonium chloride	0.363636	0.347826	0.0833333	0	0.04	0.047619	0.322581	0.0952381	0.192308	0.0344828	0.142857	0.2	0.0714286	0.0666667	0	0.208333	0.0740741	0.166667	0.321429	0.272727	0.0740741	0.0384615	0.333333	0.28	0.166667	0.111111	0.68	0.0357143	0.16	0.130435	0.291667	0	0.32	0.15625	0.136364	0.0344828	0.12	0.304348	0.0909091	0.08	0.206897	0.3	0.115385	0.212121	0.16	0.153846	0.130435	0.0434783	0.0357143
benzocaine	0.105263	0.1	0.416667	0	0.214286	0.181818	0.103448	0	0.222222	0.105263	0	0.235294	0.105263	0.0454545	0.117647	0.176471	0.111111	0.117647	0.0769231	0.117647	0.111111	0.0588235	0.181818	0.0952381	0.117647	0.166667	0.222222	0.0526316	0.25	0	0.1	0.125	0.2	0.0769231	0.142857	0.166667	0.266667	0.166667	0	0.2	0.130435	0.111111	0.333333	0.0333333	0.0526316	0.05	0.307692	0	0
benzonatate	0	0	0.1	0	0.1	0	0.04	0.142857	0.0666667	0.0714286	0.125	0.0714286	0.0714286	0.0625	0.0833333	0.0769231	0.166667	0.181818	0	0	0.166667	0.0909091	0.0645161	0.133333	0	0	0.08	0.0769231	0.0769231	0.1	0.0666667	0.0909091	0.0588235	0.1	0	0.153846	0	0.153846	0.125	0.0909091	0.111111	0.0909091	0.166667	0.0869565	0.166667	0.153846	0.1	0	0
benzthiazide	0	0.0526316	0.153846	0.333333	0.153846	0	0.153846	0.0909091	0	0.0555556	0.0833333	0.0555556	0.117647	0.235294	0.133333	0.0588235	0.125	0.416667	0.0833333	0.0625	0.384615	0.142857	0.233333	0.166667	0.214286	0.0555556	0.107143	0.2	0.125	0.0714286	0	0.230769	0.1	0.130435	0	0.266667	0.0625	0	0.0833333	0.230769	0.142857	0.12	0.125	0.318182	0.2	0.1875	0.153846	0.181818	0.2
benzydamine	0.105263	0.047619	0.0625	0.2	0.0625	0.0833333	0.103448	0.272727	0.157895	0.3125	0.25	0.166667	0.05	0.210526	0.266667	0.0526316	0.176471	0.0555556	0.12	0	0.0526316	0.0588235	0.0540541	0.277778	0.0555556	0.166667	0.137931	0.428571	0.111111	0.133333	0.222222	0.0588235	0.0434783	0.12	0.230769	0.105263	0.117647	0.05	0.0714286	0.0588235	0.130435	0.153846	0.111111	0.192308	0.176471	0.05	0.0625	0.153846	0.0526316
benzylpenicillin	0.222222	0.210526	0.0588235	0	0.125	0	0.375	0.25	0.533333	0.222222	0.142857	0.047619	0.222222	0.0434783	0.0526316	0.166667	0.05	0.176471	0.208333	0.0526316	0.166667	0.1875	0.25	0.333333	0	0.294118	0.214286	0.05	0.235294	0.384615	0.210526	0	0.0869565	0.318182	0.0625	0	0.111111	0.1	0.333333	0.117647	0.173913	0.148148	0.166667	0.142857	0.105263	0	0.2	0.0666667	0.05
bephenium hydroxynaphthoate	0.2	0.117647	0	0	0.0769231	0	0.0740741	0.222222	0.357143	0.384615	0.0909091	0.125	0.2	0.111111	0.142857	0.133333	0.214286	0.0666667	0.136364	0.0666667	0	0.0714286	0.125	0.176471	0	0.285714	0.153846	0.0625	0.0625	0.272727	0.117647	0.0714286	0.166667	0.190476	0.181818	0.0588235	0.142857	0	0.0909091	0.153846	0.0952381	0.125	0.214286	0.12	0	0	0.0769231	0	0.133333
bepridil	0.259259	0.296296	0.111111	0.107143	0.0344828	0	0.551724	0.0384615	0.206897	0.133333	0.037037	0.0625	0.133333	0.2	0	0.178571	0.137931	0.142857	0.366667	0.185185	0.1	0.148148	0.444444	0.333333	0.185185	0.133333	0.533333	0.03125	0.178571	0.2	0.296296	0.107143	0.193548	0.171429	0.0740741	0.133333	0.0322581	0.259259	0.12	0.0689655	0.181818	0.264706	0.137931	0.294118	0.1	0.133333	0.153846	0.037037	0.178571
berberine	0.192308	0.230769	0.125	0.037037	0.08	0	0.5	0.0909091	0.28	0.107143	0.136364	0.0689655	0.192308	0.1	0.0740741	0.153846	0.0344828	0.16	0.266667	0.16	0.153846	0.217391	0.580645	0.222222	0.115385	0.107143	0.34375	0.0344828	0.25	0.125	0.230769	0.0769231	0.214286	0.407407	0.0833333	0.148148	0.0357143	0.291667	0.190476	0.166667	0.285714	0.333333	0.111111	0.28125	0.2	0.192308	0.173913	0.0416667	0.2
bergenin	0.0588235	0.117647	0.0769231	0.0714286	0.272727	0.111111	0.16	0.222222	0.357143	0.0588235	0.333333	0.2	0.2	0.111111	0.230769	0.307692	0.0625	0.230769	0.136364	0.230769	0.307692	0.25	0.2	0.0526316	0.230769	0.125	0.0714286	0.133333	0.0625	0.272727	0.266667	0.153846	0.166667	0.25	0	0.0588235	0.142857	0	0.5	0.153846	0.15	0.08	0.0625	0.166667	0.416667	0.2	0	0.333333	0.307692
beta-escin	0.16	0.111111	0.190476	0.0833333	0.0869565	0	0.290323	0.047619	0.111111	0.0740741	0.0454545	0.0357143	0.0740741	0.192308	0.0384615	0.0769231	0.12	0.173913	0.16129	0.125	0.217391	0.130435	0.27027	0.192308	0.227273	0.16	0.366667	0.12	0.166667	0.0416667	0.2	0.130435	0.185185	0.125	0.0434783	0.115385	0.08	0.16	0.0952381	0.130435	0.133333	0.1875	0.12	0.147059	0.0769231	0.115385	0.136364	0.0454545	0.166667
betahistine	0	0.0434783	0.0555556	0.428571	0.0555556	0	0.214286	0.0666667	0.0909091	0.277778	0.0625	0.0952381	0.277778	0.25	0.166667	0.157895	0.294118	0.166667	0.2	0.105263	0.222222	0.333333	0.322581	0.25	0.105263	0.15	0.129032	0.157895	0.1	0.266667	0.0434783	0.25	0.04	0.2	0.0588235	0.352941	0.05	0	0.0625	0.111111	0.272727	0.230769	0.157895	0.5	0.294118	0.15	0.0555556	0.133333	0.375
betamethasone	0.1	0.0952381	0.0588235	0.117647	0.0588235	0.166667	0.0645161	0.0714286	0.0952381	0.294118	0.0666667	0.157895	0.157895	0.142857	0.176471	0.3125	0.235294	0.111111	0.16	0.176471	0.105263	0.0555556	0.176471	0.0434783	0.111111	0.294118	0.172414	0.3125	0.105263	0.0588235	0.0952381	0.117647	0.190476	0.318182	0.214286	0.047619	0.25	0	0.0666667	0.357143	0.173913	0.192308	0.105263	0.185185	0.105263	0.1	0.0588235	0.142857	0.166667
betaxolol	0.192308	0.230769	0.125	0.166667	0.125	0	0.5	0.142857	0.391304	0.24	0.190476	0.0689655	0.347826	0.222222	0.115385	0.25	0.153846	0.26087	0.407407	0.115385	0.25	0.333333	0.53125	0.269231	0.115385	0.148148	0.228571	0.0714286	0.25	0.285714	0.185185	0.12	0.172414	0.407407	0.04	0.291667	0	0.192308	0.25	0.0769231	0.2	0.25	0.2	0.413793	0.25	0.192308	0.227273	0.136364	0.304348
betazole	0.105263	0.1	0.0625	0.0588235	0.133333	0	0.333333	0.166667	0.466667	0.166667	0.153846	0.166667	0.4	0.0952381	0.117647	0.25	0.0526316	0.117647	0.166667	0.266667	0.176471	0.2	0.3	0.210526	0.0555556	0.235294	0.137931	0.0526316	0.0526316	0.307692	0.222222	0.0588235	0.142857	0.333333	0	0.166667	0.0555556	0.05	0.363636	0.2	0.3	0.25	0	0.24	0.176471	0.166667	0.0625	0.0714286	0.176471
bethanechol	0.117647	0.0526316	0	0.230769	0.0714286	0.222222	0.111111	0.0909091	0.111111	0.0555556	0.181818	0.357143	0.117647	0.166667	0.133333	0.125	0	0.0625	0.181818	0.133333	0.0588235	0.0666667	0.0882353	0.05	0	0.117647	0.107143	0.2	0	0	0	0	0.1	0.181818	0.4	0.117647	0.214286	0	0	0.230769	0.0909091	0.166667	0.0588235	0.16	0.2	0.117647	0	0.0833333	0.2
betonicine	0.0588235	0.0555556	0.166667	0.0714286	0.0769231	0.111111	0.0740741	0.1	0.117647	0.2	0.0909091	0.285714	0.0588235	0.111111	0	0.133333	0.214286	0.142857	0.136364	0.0666667	0.0625	0	0.0909091	0.111111	0	0.285714	0.25	0.0625	0.133333	0.0769231	0	0.0714286	0.05	0.0416667	0.444444	0.125	0.230769	0.0588235	0	0.153846	0.0454545	0.08	0.307692	0.0769231	0.0625	0	0.166667	0	0.0625
betulin	0	0	0.25	0.142857	0.153846	0.1	0	0.0909091	0.176471	0.266667	0.0833333	0.1875	0.117647	0	0.307692	0.125	0.285714	0.0625	0.04	0.0625	0.125	0.0666667	0.121212	0.105263	0.133333	0.266667	0.107143	0.285714	0.0588235	0.153846	0.111111	0.454545	0.1	0.0833333	0.0769231	0.117647	0.133333	0.0555556	0	0.142857	0.142857	0.12	0.2	0.16	0.0588235	0.266667	0.0714286	0.181818	0.0588235
betulinic acid	0.130435	0.125	0.1	0.15	0.157895	0.2	0.0882353	0	0.0384615	0.130435	0.0526316	0.238095	0.0833333	0.217391	0.2	0.190476	0.136364	0.0909091	0.222222	0.0434783	0.136364	0.0952381	0.1	0.0769231	0.142857	0.0833333	0.151515	0.315789	0.190476	0	0.227273	0.0454545	0.16	0.0645161	0.166667	0.181818	0.142857	0.130435	0	0	0.107143	0.166667	0.190476	0.16129	0.136364	0.04	0.157895	0.0526316	0.0869565
bezafibrate	0.0434783	0.136364	0.111111	0.235294	0.111111	0	0.296296	0.0625	0.190476	0.333333	0.125	0.0909091	0.411765	0.238095	0.1	0.352941	0.15	0.157895	0.291667	0.157895	0.15	0.235294	0.3125	0.238095	0.047619	0.142857	0.125	0.0952381	0.15	0.333333	0.136364	0.105263	0.08	0.291667	0.0555556	0.333333	0	0.0434783	0.125	0.05	0.16	0.137931	0.277778	0.416667	0.277778	0.2	0.176471	0.125	0.352941
bicuculline	0	0	0	0.181818	0	0	0.08	0	0.0625	0.0666667	0.111111	0.0666667	0.142857	0.0588235	0.0769231	0.153846	0.153846	0.0769231	0.0454545	0.166667	0.153846	0.0833333	0.0967742	0	0.0769231	0.142857	0.037037	0.153846	0	0	0.0625	0.181818	0.0555556	0.210526	0	0.142857	0.0769231	0	0	0.3	0.105263	0.0869565	0	0.130435	0.153846	0.333333	0	0.111111	0.25
biotin	0.117647	0	0.153846	0.142857	0.0714286	0.1	0.0714286	0.0909091	0.111111	0.1875	0	0.117647	0.117647	0.105263	0.214286	0.125	0.125	0.0625	0.0833333	0.214286	0.0588235	0.230769	0.15625	0.05	0.214286	0.266667	0.107143	0.2	0.0588235	0	0.111111	0.142857	0.222222	0.238095	0.0769231	0.0555556	0.307692	0	0	0.454545	0.142857	0.12	0.2	0.115385	0.0588235	0.117647	0.0714286	0.0833333	0.2
biperiden	0.0588235	0.0555556	0.272727	0	0.166667	0.111111	0.115385	0	0.0555556	0.125	0	0.125	0.0588235	0.0526316	0.0666667	0.0625	0.0625	0.142857	0.0416667	0.0666667	0.133333	0.0714286	0.16129	0.0526316	0.230769	0.125	0.153846	0.133333	0.214286	0	0.266667	0.153846	0.105263	0.0869565	0.0833333	0.0588235	0.142857	0.125	0	0.153846	0.210526	0.08	0.214286	0.12	0	0	0.272727	0	0.0625
bisacodyl	0.157895	0.15	0.125	0	0.0588235	0	0.178571	0.0714286	0.0952381	0.1	0.0666667	0.047619	0	0.0909091	0.0526316	0	0.05	0.0526316	0.16	0.111111	0.05	0.0555556	0.212121	0.142857	0.111111	0.1	0.36	0.105263	0.05	0	0.277778	0.117647	0.190476	0.115385	0.0625	0.047619	0.0526316	0.294118	0.0666667	0.0555556	0.125	0.192308	0.05	0.0666667	0.05	0.222222	0	0.0666667	0.105263
bisoprolol	0.0526316	0.105263	0	0.0625	0.142857	0	0.192308	0.0833333	0.235294	0.333333	0.0769231	0.111111	0.25	0.1	0.0588235	0.1875	0.266667	0.285714	0.125	0.0588235	0.266667	0.133333	0.266667	0.157895	0.0588235	0.25	0.103448	0.1875	0.117647	0.6	0.235294	0.214286	0.0952381	0.35	0	0.176471	0	0	0.272727	0.0625	0.190476	0.26087	0.0555556	0.304348	0.1875	0.0526316	0	0.0769231	0.117647
blebbistatin	0.0434783	0.0869565	0.0526316	0.166667	0.0526316	0	0.166667	0.0625	0.0869565	0.2	0.0588235	0	0.263158	0.238095	0.1	0.210526	0.277778	0.157895	0.192308	0.1	0.277778	0.235294	0.3125	0.181818	0.222222	0.2	0.16129	0.210526	0.15	0.111111	0.0869565	0.166667	0.227273	0.347826	0	0.142857	0.047619	0	0.2	0.3125	0.115385	0.137931	0.0454545	0.307692	0.210526	0.2	0.0526316	0.125	0.352941
boldine	0.05	0.222222	0	0.2	0.0625	0.181818	0.142857	0.0769231	0.047619	0	0.153846	0.235294	0	0.210526	0.0555556	0.0526316	0.111111	0.266667	0.166667	0.117647	0.176471	0.0588235	0.181818	0.15	0.0555556	0.05	0.269231	0.176471	0	0.133333	0.047619	0.125	0.0909091	0.12	0.333333	0.05	0.1875	0.05	0.0714286	0.125	0.04	0.2	0.0526316	0.24	0.333333	0.166667	0	0.0714286	0.111111
bretylium tosilate	0.176471	0.105263	0.230769	0	0.0666667	0.0909091	0.0689655	0.0833333	0.166667	0.25	0	0.25	0.0526316	0.047619	0.125	0.117647	0.117647	0.0588235	0.0384615	0.0588235	0	0	0.0555556	0.157895	0	0.25	0.185185	0.117647	0.0555556	0	0.105263	0.0625	0.0952381	0.125	0.153846	0.176471	0.2	0.176471	0	0.133333	0.0869565	0.115385	0.266667	0	0.0555556	0.111111	0.0666667	0	0
brinzolamide	0.0526316	0.05	0.142857	0.214286	0.142857	0.0909091	0.107143	0	0.105263	0.0526316	0.166667	0.176471	0.25	0.157895	0.2	0.357143	0.117647	0.125	0.125	0.285714	0.117647	0.0625	0.1875	0	0.125	0.111111	0.103448	0.117647	0.117647	0.0666667	0.05	0.133333	0.15	0.227273	0.153846	0.176471	0.125	0.0526316	0.0769231	0.416667	0.190476	0.16	0.117647	0.2	0.266667	0.333333	0.142857	0.166667	0.266667
bromocriptine	0.25	0.130435	0.105263	0.1	0.166667	0	0.285714	0.0588235	0.181818	0.190476	0.0555556	0.0869565	0.136364	0.173913	0.15	0.2	0.263158	0.15	0.333333	0.210526	0.0909091	0.1	0.228571	0.285714	0.15	0.190476	0.233333	0.0434783	0.2	0.3125	0.238095	0.157895	0.272727	0.103448	0.0526316	0.25	0.0952381	0.136364	0.0555556	0	0.2	0.214286	0.2	0.206897	0.142857	0.0869565	0.166667	0.0555556	0.0909091
bromopride	0.117647	0.176471	0.0714286	0.0666667	0.153846	0.1	0.2	0.0909091	0.25	0.1875	0.0833333	0.117647	0.1875	0.105263	0.0625	0.2	0.0588235	0.133333	0.238095	0.0625	0.0588235	0.142857	0.193548	0.05	0.133333	0.1875	0.148148	0.125	0.125	0.25	0.428571	0.142857	0.1	0.238095	0.166667	0.0555556	0.0625	0.0555556	0.181818	0.0666667	0.0909091	0.037037	0.125	0.208333	0.0588235	0.0555556	0.153846	0.0833333	0.2
bromperidol	0.0833333	0.125	0	0.210526	0.047619	0	0.233333	0.0555556	0.173913	0.238095	0.0526316	0.130435	0.181818	0.4	0.0434783	0.136364	0.315789	0.0909091	0.269231	0.0434783	0.0869565	0.15	0.222222	0.272727	0.0909091	0.0833333	0.266667	0.0869565	0.0869565	0.222222	0.173913	0.15	0.115385	0.137931	0.166667	0.238095	0	0.04	0.0526316	0.0454545	0.0689655	0.09375	0.190476	0.333333	0.136364	0.04	0.1	0	0.388889
brompheniramine	0.166667	0.16	0.142857	0.25	0.0909091	0.111111	0.258065	0	0.115385	0.12	0.1	0.217391	0.272727	0.111111	0.181818	0.173913	0.173913	0.181818	0.206897	0.130435	0.227273	0.0869565	0.352941	0.0714286	0.0833333	0.272727	0.25	0.227273	0.125	0	0.115385	0.25	0.148148	0.296296	0.277778	0.217391	0.238095	0.0769231	0.047619	0.25	0.269231	0.275862	0.08	0.310345	0.173913	0.217391	0.0909091	0.157895	0.227273
bucladesine	0.0625	0.0588235	0.181818	0	0.181818	0.285714	0	0	0.125	0.133333	0	0.416667	0.0625	0.117647	0.153846	0.0666667	0.142857	0	0.0909091	0.0714286	0.0666667	0.0769231	0.0606061	0.117647	0.153846	0.0625	0.115385	0.0666667	0	0.0833333	0.125	0.166667	0.111111	0	0.0909091	0.133333	0.25	0.133333	0	0	0.1	0.04	0.230769	0.0384615	0	0.0625	0	0	0
budesonide	0.105263	0.222222	0.0625	0.125	0.214286	0	0.28	0.166667	0.222222	0.105263	0.25	0.105263	0.3125	0.210526	0.117647	0.428571	0.0526316	0.266667	0.333333	0.1875	0.176471	0.2	0.258065	0.0952381	0.117647	0.105263	0.137931	0.0526316	0.25	0.214286	0.157895	0	0.0909091	0.217391	0.0666667	0.235294	0	0.105263	0.25	0.125	0.130435	0.0714286	0.176471	0.347826	0.333333	0.235294	0.307692	0.153846	0.333333
bufexamac	0.176471	0.05	0.0666667	0.0625	0	0	0.24	0.3	0.166667	0.176471	0.166667	0	0.0526316	0.1	0.125	0.0555556	0.117647	0.0588235	0.173913	0.125	0.0555556	0.0625	0.151515	0.375	0.125	0.111111	0.230769	0.1875	0.117647	0.142857	0.3125	0.133333	0.15	0.173913	0.153846	0.0526316	0.125	0.111111	0.0769231	0.0625	0.315789	0.16	0.0555556	0.153846	0.0555556	0.111111	0.0666667	0.0769231	0.0555556
buflomedil	0.0434783	0.0416667	0.111111	0.166667	0.111111	0.142857	0.206897	0.0625	0.190476	0.142857	0.0588235	0.2	0.142857	0.130435	0.1	0.210526	0.0454545	0.1	0.291667	0.1	0.15	0.3125	0.235294	0.130435	0.047619	0.2	0.16129	0.15	0.210526	0.111111	0.136364	0.105263	0.08	0.291667	0.357143	0.142857	0.157895	0.0909091	0.0588235	0.105263	0.115385	0.0645161	0.352941	0.214286	0.0952381	0.0909091	0.25	0	0.210526
bumetanide	0.125	0.12	0.0952381	0.0909091	0.210526	0.117647	0.1875	0.176471	0.333333	0.173913	0.235294	0.421053	0.285714	0.0740741	0.190476	0.3	0.130435	0.136364	0.172414	0.136364	0.181818	0.0909091	0.216216	0.208333	0	0.35	0.258065	0.181818	0.130435	0.210526	0.0769231	0.0434783	0.111111	0.259259	0.294118	0.173913	0.136364	0.08	0.166667	0.0909091	0.230769	0.241379	0.181818	0.321429	0.368421	0.125	0.0952381	0.105263	0.0833333
bupivacaine	0	0	0.125	0	0.125	0	0	0.2	0.0769231	0.0833333	0.166667	0	0.0833333	0	0.1	0.2	0.0909091	0	0.0526316	0	0	0	0	0.0714286	0	0.0833333	0.0416667	0	0.2	0.125	0	0	0	0	0.142857	0.0833333	0	0.0833333	0	0	0.0588235	0	0.2	0.0454545	0.0909091	0.0833333	0.285714	0	0
bupropion	0.166667	0.294118	0.0625	0.0588235	0	0	0.391304	0	0.375	0.105263	0.0714286	0.05	0.235294	0.0952381	0	0.111111	0.0526316	0.0555556	0.166667	0.0555556	0.111111	0.125	0.258065	0.15	0.0555556	0.105263	0.137931	0	0.111111	0.0625	0.157895	0.0588235	0.0434783	0.217391	0	0.166667	0	0.166667	0.153846	0.0588235	0.0833333	0.111111	0	0.148148	0.111111	0.105263	0.133333	0	0.176471
buspirone	0.0625	0	0.0833333	0.0769231	0	0	0.12	0.25	0.2	0.214286	0.222222	0.0625	0.214286	0	0.153846	0.142857	0.142857	0.153846	0	0.0714286	0.333333	0.0769231	0.166667	0.1875	0	0.133333	0.0740741	0.333333	0.0666667	0.0833333	0.0588235	0.166667	0.0526316	0.263158	0	0.214286	0.0714286	0	0.1	0.166667	0.294118	0.3	0	0.227273	0.142857	0.214286	0	0.1	0.0666667
butacaine	0	0	0.0625	0.5	0.0625	0.0833333	0.185185	0.0769231	0.047619	0.235294	0.153846	0.105263	0.166667	0.352941	0.117647	0.111111	0.176471	0.117647	0.272727	0.0555556	0.111111	0.285714	0.21875	0.210526	0.117647	0.05	0.1	0.111111	0.111111	0.214286	0.047619	0.2	0.0434783	0.217391	0.230769	0.3125	0	0	0	0.0588235	0.181818	0.111111	0.25	0.47619	0.111111	0.105263	0.133333	0.153846	0.333333
butamben	0.190476	0.181818	0.05	0.157895	0.235294	0.133333	0.125	0.0588235	0.130435	0.0416667	0.1875	0.25	0.190476	0.285714	0.277778	0.333333	0.0909091	0.0952381	0.28	0.210526	0.0909091	0.047619	0.102564	0.08	0.277778	0.0869565	0.15625	0.142857	0.142857	0.105263	0.238095	0.047619	0.272727	0.185185	0.111111	0.136364	0.210526	0.0416667	0.1875	0.1	0.2	0.0967742	0.0434783	0.166667	0.333333	0.190476	0.05	0.266667	0.2
butein	0.266667	0.344828	0.0967742	0.129032	0.0625	0	0.53125	0.0689655	0.21875	0.151515	0.0666667	0.0857143	0.151515	0.142857	0.0588235	0.121212	0.0882353	0.241379	0.323529	0.16129	0.15625	0.129032	0.513514	0.290323	0.0909091	0.1875	0.351351	0.0277778	0.15625	0.214286	0.181818	0.09375	0.205882	0.25	0.0645161	0.151515	0.125	0.266667	0.142857	0.0606061	0.194444	0.424242	0.15625	0.263158	0.121212	0.117647	0.172414	0.0666667	0.0882353
butirosin	0.0666667	0.0625	0.0909091	0.0833333	0.0909091	0.142857	0	0	0	0.0666667	0	0.0666667	0.142857	0.0588235	0.166667	0.363636	0.153846	0	0.0952381	0.166667	0.0714286	0	0.030303	0.0588235	0.166667	0.142857	0.0769231	0.0714286	0.153846	0	0.0625	0.0833333	0.0555556	0.0454545	0.1	0.142857	0.272727	0.0666667	0	0.0833333	0.235294	0.0416667	0.0714286	0.04	0.153846	0.142857	0.0909091	0.111111	0.0714286
butoconazole	0.391304	0.375	0.0769231	0.0357143	0.037037	0	0.433333	0.0869565	0.269231	0.142857	0.0833333	0.0666667	0.0666667	0.172414	0.0344828	0.148148	0.24	0.2	0.3	0.153846	0.107143	0.0357143	0.351351	0.36	0.2	0.103448	0.466667	0.0689655	0.192308	0.217391	0.375	0.115385	0.346154	0.181818	0.0384615	0.103448	0.0714286	0.28	0.130435	0.0740741	0.15625	0.28125	0.0689655	0.235294	0.148148	0.0666667	0.166667	0.04	0.0689655
butyl hydroxybenzoate	0.115385	0.0344828	0.190476	0.3	0.136364	0.05	0.176471	0.1	0.153846	0.318182	0.0952381	0.208333	0.208333	0.24	0.285714	0.12	0.272727	0.173913	0.2	0.0384615	0.217391	0.181818	0.27027	0.24	0.08	0.16	0.205882	0.272727	0.12	0.190476	0.0714286	0.238095	0.142857	0.241379	0.0909091	0.380952	0.08	0.0740741	0.0454545	0.0833333	0.307692	0.357143	0.217391	0.444444	0.217391	0.16	0.0869565	0.0952381	0.166667
BW-B70C	0.380952	0.25	0.136364	0	0.0869565	0.05	0.212121	0.157895	0.2	0.115385	0.15	0.115385	0.0357143	0.0689655	0.173913	0.12	0.037037	0.08	0.285714	0.173913	0.12	0.0833333	0.236842	0.24	0.227273	0.115385	0.322581	0.166667	0.166667	0.0416667	0.304348	0.04	0.391304	0.16129	0.0434783	0.0357143	0.173913	0.26087	0.0454545	0.130435	0.214286	0.310345	0.12	0.147059	0.0769231	0.208333	0.136364	0.0454545	0.0769231
C-75	0.1	0.133333	0.16	0.0714286	0.0740741	0	0.294118	0.130435	0.214286	0.1	0.173913	0.1	0.137931	0.166667	0.0333333	0.103448	0.185185	0.24	0.212121	0.148148	0.230769	0.153846	0.457143	0.129032	0.107143	0.137931	0.40625	0.0666667	0.185185	0.115385	0.0967742	0.153846	0.285714	0.333333	0.12	0.137931	0.107143	0.178571	0.08	0.25	0.151515	0.354839	0.185185	0.30303	0.142857	0.269231	0.16	0.0384615	0.230769
caffeic acid	0.0416667	0.130435	0.105263	0.157895	0.3125	0	0.333333	0.0588235	0.238095	0.190476	0.117647	0.136364	0.470588	0.173913	0.210526	0.411765	0.2	0.277778	0.185185	0.210526	0.411765	0.222222	0.387097	0.173913	0.15	0.315789	0.0882353	0.0909091	0.263158	0.3125	0.0833333	0.157895	0.0769231	0.28	0	0.315789	0.0952381	0.0416667	0.266667	0.157895	0.304348	0.172414	0.2	0.346154	0.411765	0.190476	0.166667	0.1875	0.333333
calcium folinate	0.0454545	0.0434783	0.266667	0.111111	0.357143	0.25	0.030303	0	0.0909091	0.15	0.0625	0.4375	0.210526	0.0869565	0.3125	0.222222	0.222222	0.105263	0.0714286	0.105263	0.157895	0.0526316	0.138889	0.0416667	0.105263	0.277778	0.129032	0.157895	0.157895	0.0555556	0.0434783	0.176471	0.130435	0.0714286	0.2	0.210526	0.3125	0.15	0	0.176471	0.217391	0.142857	0.375	0.1	0.157895	0.15	0.117647	0.133333	0.047619
calcium pantothenate	0	0	0.272727	0.153846	0.166667	0	0.16	0.222222	0.117647	0.125	0.2	0	0.0588235	0.176471	0.0666667	0.214286	0.214286	0.333333	0.136364	0.142857	0.307692	0.153846	0.2	0.111111	0.230769	0.2	0.153846	0.0625	0.307692	0.166667	0	0.153846	0.105263	0.0416667	0.0833333	0.2	0.0666667	0	0.0909091	0.25	0.0952381	0.125	0.214286	0.217391	0.133333	0.0588235	0.4	0.0909091	0.214286
calmidazolium	0.2	0.194444	0.151515	0.0833333	0.0857143	0.030303	0.432432	0.129032	0.264706	0.235294	0.0909091	0.0769231	0.135135	0.189189	0.142857	0.108108	0.205882	0.176471	0.289474	0.111111	0.205882	0.21875	0.538462	0.375	0.212121	0.135135	0.5	0.171429	0.171429	0.1875	0.264706	0.21875	0.285714	0.225	0.0571429	0.135135	0.0810811	0.2	0.125	0.114286	0.27027	0.457143	0.171429	0.368421	0.108108	0.166667	0.117647	0.0588235	0.171429
calycanthine	0.0952381	0.0434783	0.117647	0.176471	0.1875	0.153846	0.172414	0.142857	0.2	0.15	0.133333	0.277778	0.0952381	0.190476	0.235294	0.1	0.294118	0.235294	0.111111	0.05	0.157895	0.0526316	0.171429	0.136364	0.105263	0.210526	0.25	0.294118	0.1	0.1875	0.0909091	0.25	0.0833333	0.153846	0.285714	0.210526	0.166667	0.0454545	0.0625	0.176471	0.166667	0.28	0.1	0.222222	0.294118	0.0952381	0.0555556	0.0625	0.1
camptothecin	0.210526	0.263158	0.117647	0	0.0555556	0	0.259259	0	0.0434783	0.0952381	0	0.0952381	0.0952381	0.0869565	0.05	0.047619	0.1	0.05	0.25	0.05	0	0.0526316	0.242424	0.0869565	0.05	0	0.25	0	0.157895	0	0.0909091	0	0.130435	0.111111	0	0.0952381	0	0.916667	0	0	0.12	0.185185	0.222222	0.0645161	0.047619	0.210526	0.1875	0	0.047619
canadine	0.05	0.047619	0.0625	0.2	0.214286	0.181818	0.103448	0.166667	0.157895	0.166667	0.25	0.3125	0.105263	0.15	0.1875	0.176471	0.176471	0.1875	0.217391	0.0555556	0.111111	0.125	0.147059	0.210526	0.0555556	0.166667	0.178571	0.111111	0.176471	0.416667	0.047619	0.125	0.0434783	0.12	0.454545	0.166667	0.117647	0.05	0.0714286	0.0588235	0.181818	0.2	0.25	0.291667	0.333333	0.05	0.133333	0.0714286	0.111111
canavanine	0.111111	0.192308	0.181818	0.125	0.130435	0	0.366667	0.0454545	0.291667	0.2	0.0909091	0.0714286	0.363636	0.103448	0.12	0.26087	0.16	0.217391	0.275862	0.166667	0.26087	0.173913	0.548387	0.142857	0.166667	0.25	0.272727	0.16	0.318182	0.130435	0.148148	0.173913	0.178571	0.37037	0	0.2	0.0769231	0.153846	0.2	0.285714	0.296296	0.344828	0.0740741	0.333333	0.16	0.304348	0.181818	0.2	0.208333
canrenoic acid	0.05	0.047619	0.307692	0.125	0.133333	0	0.142857	0.166667	0.157895	0.235294	0.25	0.05	0.235294	0.0952381	0.1875	0.25	0.25	0.1875	0.166667	0.1875	0.176471	0.125	0.258065	0.0952381	0.266667	0.235294	0.222222	0.111111	0.333333	0.0625	0.047619	0.2	0.142857	0.12	0.0666667	0.166667	0.117647	0.05	0.0714286	0.285714	0.3	0.2	0.176471	0.291667	0.176471	0.235294	0.307692	0.25	0.25
cantharidin	0.166667	0.318182	0.0909091	0.136364	0	0	0.444444	0	0.208333	0.12	0	0.037037	0.12	0.2	0	0.08	0.125	0.181818	0.25	0.0833333	0.173913	0.190476	0.4375	0.2	0.0833333	0.0769231	0.25	0.0384615	0.125	0.142857	0.115385	0.136364	0.107143	0.25	0	0.166667	0.04	0.272727	0.1	0.0869565	0.0645161	0.233333	0.125	0.225806	0.08	0.166667	0.142857	0	0.173913
capsaicin	0.173913	0.217391	0.0952381	0.2	0.0952381	0	0.357143	0.111111	0.272727	0.35	0.105263	0.08	0.285714	0.208333	0.136364	0.181818	0.3	0.25	0.307692	0.0869565	0.181818	0.263158	0.40625	0.208333	0.0416667	0.173913	0.181818	0.0833333	0.0833333	0.4375	0.166667	0.263158	0.2	0.307692	0.047619	0.285714	0.0416667	0.08	0.166667	0.0909091	0.142857	0.285714	0.181818	0.423077	0.130435	0.125	0.0952381	0.105263	0.238095
captopril	0	0.0384615	0.157895	0.277778	0.157895	0.125	0.121212	0.1875	0.173913	0.3	0.25	0.181818	0.238095	0.4	0.2	0.25	0.25	0.2	0.32	0.0909091	0.315789	0.352941	0.333333	0.166667	0.142857	0.0833333	0.1875	0.388889	0.190476	0.157895	0.125	0.15	0.208333	0.269231	0.166667	0.238095	0.0434783	0.04	0.176471	0.210526	0.148148	0.166667	0.25	0.5	0.190476	0.181818	0.157895	0.176471	0.315789
carbachol	0.210526	0.142857	0.0555556	0.0526316	0.117647	0	0.307692	0.0666667	0.5	0.15	0.133333	0.210526	0.277778	0.0869565	0.105263	0.222222	0.157895	0.235294	0.2	0.3125	0.157895	0.111111	0.322581	0.136364	0.166667	0.352941	0.206897	0	0.1	0.266667	0.263158	0.176471	0.130435	0.304348	0.0588235	0.15	0.166667	0.0952381	0.307692	0.111111	0.272727	0.230769	0.047619	0.178571	0.222222	0.0952381	0.117647	0.133333	0.157895
carbamazepine	0.117647	0.176471	0	0	0	0.1	0.0344828	0	0.0526316	0.266667	0	0.117647	0.117647	0.166667	0.0625	0.125	0.125	0	0.181818	0	0	0.0666667	0.0571429	0.105263	0	0.0555556	0.107143	0.0588235	0	0.0714286	0.176471	0	0.222222	0.130435	0.0769231	0.0555556	0.133333	0.0555556	0.0833333	0	0	0.0769231	0.125	0.0357143	0	0	0	0	0.125
carbarsone	0.125	0	0	0	0	0	0.16	0.222222	0.266667	0.125	0.2	0.125	0.2	0	0.0666667	0.133333	0.133333	0.230769	0	0.142857	0.416667	0.153846	0.2	0.176471	0	0.285714	0.111111	0.214286	0.0625	0.0769231	0.0555556	0.0714286	0.105263	0.388889	0.0833333	0.125	0.142857	0	0.2	0.25	0.210526	0.285714	0.0625	0.166667	0.133333	0.125	0	0	0.0625
carbenoxolone	0	0	0.1	0	0.1	0	0	0.142857	0.0666667	0.25	0.125	0	0.25	0.0625	0.0833333	0.272727	0.272727	0	0.1	0	0.0769231	0.0909091	0.0645161	0.0625	0	0.153846	0.08	0.0769231	0.272727	0.1	0	0	0.0588235	0.1	0.111111	0.153846	0	0.0714286	0	0	0.111111	0.0434783	0.272727	0.136364	0.0769231	0.0714286	0.222222	0	0.0769231
carbimazole	0.1	0	0	0.1875	0.125	0.0769231	0.1	0.153846	0.15	0.157895	0.142857	0.222222	0.1	0.0909091	0.25	0.105263	0.235294	0.176471	0.0740741	0.111111	0.166667	0.0555556	0.176471	0.0909091	0.0526316	0.294118	0.172414	0.3125	0.05	0.125	0.0952381	0.266667	0.0869565	0.26087	0.307692	0.1	0.176471	0	0.0666667	0.266667	0.285714	0.291667	0.05	0.28	0.235294	0.1	0	0.142857	0.166667
carbinoxamine	0.130435	0.173913	0.1	0.0952381	0.1	0	0.275862	0.1875	0.285714	0.238095	0.176471	0.0833333	0.3	0.0769231	0.2	0.315789	0.136364	0.263158	0.137931	0.2	0.315789	0.15	0.375	0.217391	0.2	0.3	0.1875	0.315789	0.190476	0.157895	0.227273	0.15	0.16	0.434783	0	0.130435	0.0909091	0.04	0.333333	0.277778	0.347826	0.296296	0	0.384615	0.315789	0.238095	0.1	0.25	0.190476
carcinine	0.0434783	0.190476	0.0526316	0.166667	0.111111	0	0.296296	0.0625	0.25	0.142857	0.125	0.142857	0.333333	0.238095	0.047619	0.352941	0.210526	0.294118	0.148148	0.294118	0.352941	0.166667	0.4	0.130435	0.1	0.142857	0.16129	0.0952381	0.0952381	0.333333	0.136364	0.166667	0.125	0.291667	0	0.333333	0.047619	0	0.2	0.166667	0.208333	0.269231	0.0454545	0.478261	0.277778	0.2	0.111111	0.0588235	0.277778
carisoprodol	0.047619	0.0454545	0.2	0.1875	0.125	0	0.269231	0.25	0.210526	0.157895	0.230769	0.1	0.157895	0.142857	0.176471	0.05	0.166667	0.333333	0.0740741	0.0526316	0.4	0.117647	0.290323	0.263158	0.111111	0.157895	0.214286	0.3125	0.105263	0.125	0.0454545	0.266667	0.0869565	0.208333	0.0625	0.222222	0.111111	0	0.142857	0.266667	0.227273	0.291667	0.05	0.333333	0.4	0.222222	0.0588235	0.142857	0.235294
carmustine	0.136364	0.130435	0.05	0.1	0.166667	0.133333	0.241379	0.125	0.238095	0.0416667	0.266667	0.190476	0.136364	0.173913	0.15	0.0909091	0.0434783	0.210526	0.142857	0.0952381	0.333333	0.222222	0.264706	0.227273	0.15	0.0869565	0.121212	0.142857	0.0434783	0.166667	0.130435	0.1	0.217391	0.230769	0.111111	0.0869565	0.0952381	0.0416667	0.266667	0.1	0.0714286	0.214286	0.0909091	0.206897	0.333333	0.0869565	0	0.117647	0.2
carteolol	0.0526316	0.166667	0	0.214286	0.142857	0.2	0.192308	0.0833333	0.235294	0.176471	0.272727	0.25	0.25	0.222222	0.0588235	0.461538	0.0555556	0.125	0.35	0.2	0.117647	0.133333	0.151515	0.047619	0	0.176471	0.103448	0.117647	0.0555556	0.230769	0.166667	0	0.0454545	0.227273	0.25	0.176471	0.0588235	0	0.166667	0.0625	0.0416667	0.0357143	0.117647	0.25	0.1875	0.111111	0.142857	0.166667	0.266667
CAY-10397	0	0	0	0.142857	0.0714286	0	0.2	0.0909091	0.111111	0.1875	0.0833333	0	0.117647	0.235294	0.0625	0.0588235	0.125	0.214286	0.238095	0.0625	0.285714	0.454545	0.233333	0.166667	0.133333	0.117647	0.0333333	0.125	0.2	0.153846	0.0526316	0.0666667	0.1	0.3	0	0.117647	0	0.0555556	0.181818	0.0666667	0.0434783	0.0769231	0.2	0.208333	0.125	0.0555556	0.153846	0.0833333	0.285714
cefaclor	0	0	0.333333	0.214286	0.333333	0.0909091	0.148148	0	0.105263	0.25	0	0.111111	0.333333	0.1	0.285714	0.117647	0.0555556	0.125	0.125	0.0588235	0.1875	0.307692	0.225806	0.1	0.0588235	0.176471	0.0322581	0.1875	0.1875	0.142857	0.105263	0.214286	0.0454545	0.125	0	0.333333	0.125	0.0526316	0	0.133333	0.25	0.115385	0.357143	0.2	0.0555556	0.176471	0.230769	0.0769231	0.117647
cefadroxil	0.105263	0.157895	0.133333	0.125	0.133333	0	0.28	0.0769231	0.222222	0.235294	0.153846	0.105263	0.4	0.0952381	0.117647	0.333333	0.0526316	0.117647	0.333333	0.1875	0.0526316	0.125	0.258065	0.210526	0.0555556	0.105263	0.137931	0.0526316	0.25	0.307692	0.222222	0.0588235	0.0909091	0.217391	0.0666667	0.235294	0	0.166667	0.153846	0.0588235	0.3	0.2	0.176471	0.291667	0.176471	0.3125	0.214286	0.153846	0.176471
cefalexin	0	0.05	0.230769	0.307692	0.0666667	0	0.24	0	0.105263	0.176471	0.0769231	0.0526316	0.333333	0.222222	0.125	0.357143	0.0555556	0.125	0.173913	0.2	0.1875	0.214286	0.266667	0.157895	0.125	0	0.0322581	0.0555556	0.1875	0.230769	0.05	0.133333	0.0454545	0.173913	0	0.428571	0	0.0526316	0.0769231	0.133333	0.25	0.208333	0.1875	0.304348	0.1875	0.25	0.230769	0.0769231	0.357143
cefalonium	0.0952381	0.0434783	0.0555556	0.111111	0.1875	0	0.259259	0.230769	0.263158	0.15	0.214286	0.0952381	0.352941	0.0869565	0.166667	0.222222	0.157895	0.3125	0.111111	0.166667	0.466667	0.25	0.28125	0.136364	0.105263	0.4375	0.129032	0.294118	0.157895	0.117647	0.142857	0.111111	0.130435	0.5	0	0.15	0.166667	0	0.307692	0.428571	0.272727	0.185185	0.047619	0.269231	0.294118	0.277778	0.0555556	0.214286	0.222222
cefalotin	0.0909091	0.136364	0.0526316	0.05	0.0526316	0	0.25	0.133333	0.25	0.2	0.125	0.0434783	0.2	0.130435	0	0.210526	0.210526	0.294118	0.192308	0.1	0.210526	0.166667	0.354839	0.181818	0.157895	0.2	0.333333	0.0952381	0.15	0.333333	0.315789	0.166667	0.173913	0.347826	0.117647	0.0434783	0	0.0909091	0.285714	0.105263	0.16	0.222222	0.0952381	0.36	0.15	0.0434783	0.176471	0.0588235	0.210526
cefamandole	0.047619	0.0454545	0.2	0.0555556	0.125	0.166667	0.03125	0	0.0952381	0.157895	0	0.294118	0.157895	0.0434783	0.176471	0.235294	0.235294	0.111111	0.0357143	0.111111	0.235294	0.117647	0.142857	0.0909091	0.111111	0.294118	0.133333	0.235294	0.105263	0	0.0952381	0.1875	0.136364	0.208333	0.133333	0.157895	0.25	0.157895	0.0666667	0.1875	0.125	0.107143	0.3125	0.0666667	0.105263	0.222222	0.0588235	0.0666667	0.05
cefapirin	0.125	0.0555556	0.0769231	0.0714286	0.166667	0	0.115385	0.375	0.266667	0.2	0.2	0.0588235	0.125	0	0.230769	0.307692	0.133333	0.142857	0.0869565	0.142857	0.0625	0.0714286	0.0588235	0.176471	0.0666667	0.384615	0.111111	0.133333	0.133333	0.272727	0.1875	0.0714286	0.05	0.190476	0.0833333	0.0588235	0.142857	0.0588235	0.2	0.153846	0.210526	0.08	0.133333	0.12	0.307692	0.125	0.166667	0.2	0.0625
cefazolin	0.0666667	0.0625	0.0909091	0.0833333	0.0909091	0.142857	0.0384615	0.125	0.214286	0.0666667	0.111111	0.142857	0	0.0588235	0.166667	0.0714286	0.153846	0.0769231	0	0.0769231	0.153846	0.181818	0.0625	0.2	0.166667	0.0666667	0.0769231	0.0714286	0	0.0909091	0.214286	0.181818	0.117647	0.0454545	0	0.0666667	0.166667	0.0666667	0.111111	0.0833333	0.105263	0.0416667	0.153846	0.04	0.153846	0.0666667	0	0.111111	0.0714286
cefepime	0.0588235	0	0.0769231	0.0714286	0.166667	0	0.0357143	0.1	0.117647	0.384615	0	0.2	0.285714	0.176471	0.230769	0.133333	0.307692	0	0.0869565	0	0.0625	0.0714286	0.0909091	0.111111	0	0.2	0.0714286	0.214286	0.133333	0.0769231	0	0.0714286	0.05	0.136364	0.0833333	0.285714	0.0666667	0.125	0	0.0714286	0.210526	0.125	0.214286	0.166667	0.133333	0.0588235	0.0769231	0	0.133333
cefixime	0.0526316	0.166667	0	0.214286	0.0666667	0	0.192308	0.0833333	0.166667	0.25	0.0769231	0.111111	0.111111	0.294118	0	0.266667	0.117647	0.2	0.227273	0.2	0.117647	0.133333	0.151515	0.157895	0.125	0.176471	0.0666667	0.0555556	0.117647	0.454545	0.166667	0.0625	0.0454545	0.227273	0.0714286	0.176471	0.0588235	0	0.166667	0	0.0869565	0.0740741	0.1875	0.25	0.117647	0.0526316	0.142857	0.0769231	0.1875
cefmetazole	0.105263	0.157895	0.133333	0.125	0.133333	0.181818	0.142857	0	0.222222	0	0.0714286	0.4	0.235294	0.0952381	0.117647	0.25	0.0526316	0.117647	0.12	0.357143	0.176471	0.2	0.181818	0.0454545	0.117647	0.235294	0.137931	0.0526316	0	0.0625	0.1	0.125	0.142857	0.217391	0.142857	0.105263	0.357143	0.05	0.153846	0.2	0.0833333	0.0714286	0.176471	0.107143	0.176471	0.3125	0	0.153846	0.176471
cefoperazone	0.0555556	0.0526316	0.0714286	0.230769	0.153846	0.222222	0.0344828	0.0909091	0.0526316	0.0555556	0.181818	0.1875	0.0555556	0.235294	0.214286	0.285714	0.2	0	0.238095	0.133333	0	0	0	0.105263	0.214286	0.117647	0.192308	0.2	0.2	0.0714286	0.111111	0.0666667	0.047619	0	0.4	0.0555556	0.214286	0.0555556	0	0.0666667	0.142857	0	0.125	0.115385	0.285714	0.117647	0.153846	0.181818	0.125
ceforanide	0.105263	0.1	0.0625	0.125	0.133333	0	0.28	0.0769231	0.157895	0.105263	0.0714286	0.105263	0.3125	0.0952381	0.0555556	0.176471	0.111111	0.266667	0.12	0.117647	0.25	0.285714	0.3	0.277778	0.0555556	0.235294	0.137931	0.0526316	0.176471	0.307692	0.1	0.0588235	0.0909091	0.333333	0.0666667	0.235294	0.0555556	0.05	0.25	0.125	0.181818	0.2	0.176471	0.291667	0.333333	0.105263	0.0625	0.0714286	0.111111
cefotaxime	0	0	0.0625	0.384615	0.133333	0.0833333	0.0666667	0.0769231	0.1	0.235294	0.153846	0.235294	0.166667	0.210526	0.266667	0.111111	0.428571	0.1875	0.0769231	0.0555556	0.25	0.0588235	0.181818	0.210526	0.117647	0.166667	0.1	0.333333	0.0526316	0.214286	0.047619	0.384615	0.0434783	0.12	0.142857	0.3125	0.0555556	0.05	0.0714286	0.125	0.238095	0.25	0.0526316	0.347826	0.333333	0.166667	0	0.25	0.176471
cefotetan	0.0526316	0	0.142857	0.0625	0.0666667	0.0909091	0.107143	0.181818	0.235294	0.333333	0.0769231	0.0526316	0.25	0.047619	0.2	0.0555556	0.1875	0.125	0.0384615	0	0.357143	0.307692	0.225806	0.222222	0.0588235	0.25	0.103448	0.461538	0.0555556	0.0666667	0.166667	0.214286	0.15	0.35	0	0.111111	0.125	0	0.166667	0.133333	0.190476	0.208333	0.117647	0.2	0.0555556	0.111111	0	0.0769231	0.0555556
cefotiam	0.105263	0.157895	0	0.0588235	0.214286	0.181818	0.142857	0.0769231	0.222222	0.5	0.0714286	0.3125	0.235294	0.15	0.1875	0.25	0.176471	0.0555556	0.217391	0.0555556	0.0526316	0.0588235	0.147059	0.15	0	0.3125	0.0645161	0.25	0.111111	0.307692	0.157895	0.0588235	0.0434783	0.272727	0.142857	0.166667	0.117647	0.05	0.153846	0.0588235	0.181818	0.153846	0.111111	0.192308	0.111111	0	0	0.153846	0.0526316
cefoxitin	0.0588235	0.117647	0.0769231	0.0714286	0.0769231	0.111111	0.0357143	0.1	0.0555556	0.2	0.0909091	0.2	0.0588235	0.111111	0.0666667	0.214286	0.133333	0.0666667	0.190476	0	0	0	0.0285714	0.111111	0.0666667	0.125	0.153846	0.133333	0.214286	0.0769231	0.117647	0	0	0.0416667	0.3	0.125	0.0666667	0.2	0	0	0.0952381	0.0384615	0.214286	0.12	0.133333	0.0588235	0.272727	0	0.0625
cefsulodin	0.05	0.1	0.133333	0.384615	0.133333	0	0.185185	0.0769231	0.157895	0.235294	0.0714286	0.05	0.3125	0.210526	0.1875	0.428571	0.176471	0.1875	0.217391	0.1875	0.111111	0.125	0.181818	0.15	0.117647	0.235294	0.0645161	0.111111	0.111111	0.307692	0.157895	0.2	0.0434783	0.166667	0.0666667	0.3125	0.0555556	0.05	0.153846	0.125	0.130435	0.0714286	0.176471	0.24	0.25	0.235294	0.214286	0.25	0.333333
ceftazidime	0.1	0.0454545	0.125	0.0555556	0.125	0	0.222222	0.153846	0.277778	0.222222	0.230769	0.157895	0.222222	0.0434783	0.0526316	0.166667	0.3125	0.333333	0.0740741	0.111111	0.3125	0.0555556	0.333333	0.142857	0.111111	0.375	0.259259	0.05	0.235294	0.285714	0.0952381	0.1875	0.0416667	0.16	0.133333	0.294118	0.111111	0.1	0.0666667	0.117647	0.285714	0.409091	0.166667	0.28	0.166667	0.047619	0.2	0	0.105263
cefuroxime	0.0625	0.0588235	0.0833333	0.0769231	0.3	0	0.0769231	0.25	0.125	0.133333	0.222222	0.0625	0.214286	0.0555556	0.153846	0.333333	0.230769	0.25	0.142857	0.153846	0.230769	0.0769231	0.129032	0.0555556	0.153846	0.416667	0.115385	0.142857	0.333333	0.181818	0.0588235	0.0769231	0.111111	0.142857	0.0909091	0.0625	0.153846	0	0.222222	0.272727	0.157895	0.04	0.142857	0.173913	0.230769	0.133333	0.181818	0.375	0.142857
celastrol	0.296296	0.285714	0.107143	0.0322581	0.0689655	0	0.393939	0.037037	0.2	0.09375	0.0740741	0.0606061	0.129032	0.0882353	0.0645161	0.0625	0.133333	0.178571	0.135135	0.137931	0.214286	0.103448	0.432432	0.275862	0.137931	0.129032	0.382353	0.030303	0.133333	0.148148	0.2	0.185185	0.266667	0.2	0.0344828	0.129032	0.137931	0.166667	0.0740741	0.103448	0.290323	0.466667	0.0625	0.285714	0.133333	0.09375	0.107143	0	0.0967742
celecoxib	0.190476	0.0833333	0.05	0.157895	0.166667	0.133333	0.0285714	0.125	0.130435	0.190476	0.1875	0.25	0.136364	0.173913	0.210526	0.0909091	0.0909091	0.15	0.230769	0.0952381	0.142857	0.1	0.162162	0.227273	0.0952381	0.190476	0.233333	0.333333	0.0909091	0.105263	0.181818	0.1	0.272727	0.185185	0.25	0.136364	0.15	0	0.117647	0.1	0.2	0.214286	0.0434783	0.25	0.2	0.0869565	0	0.1875	0.0909091
cephaeline	0.0967742	0.166667	0.25	0.148148	0.153846	0.04	0.40625	0.125	0.346154	0.259259	0.12	0.133333	0.307692	0.2	0.185185	0.178571	0.178571	0.230769	0.138889	0.142857	0.434783	0.291667	0.575758	0.285714	0.142857	0.214286	0.243243	0.222222	0.178571	0.2	0.129032	0.24	0.15625	0.322581	0	0.307692	0.142857	0.0625	0.166667	0.24	0.3	0.387097	0.178571	0.419355	0.178571	0.259259	0.111111	0.0769231	0.222222
cetirizine	0.0588235	0.117647	0	0.25	0.0769231	0	0.26087	0	0.1875	0.125	0.0909091	0.125	0.384615	0.333333	0	0.307692	0.133333	0.230769	0.25	0.230769	0.214286	0.25	0.241379	0.0526316	0.0666667	0.0588235	0.0714286	0	0	0.272727	0.117647	0.0714286	0.105263	0.25	0	0.285714	0	0	0.2	0.0714286	0.0454545	0.08	0.133333	0.272727	0.214286	0.125	0.0769231	0.0909091	0.545455
chenodeoxycholic acid	0.0588235	0.117647	0	0.153846	0.0769231	0.25	0.0740741	0.1	0.117647	0.0588235	0.333333	0.285714	0.125	0.176471	0.142857	0.133333	0.0625	0.0666667	0.190476	0.0666667	0.133333	0.153846	0.0909091	0.0526316	0	0	0.153846	0.133333	0	0.0769231	0.117647	0	0.105263	0.136364	0.3	0.0588235	0.142857	0	0.0909091	0	0.0952381	0.125	0.0625	0.217391	0.307692	0.0588235	0	0.0909091	0.214286
Chicago Sky Blue 6B	0.0952381	0.0909091	0.266667	0.25	0.117647	0.0714286	0.259259	0	0.0909091	0.0952381	0.133333	0.0952381	0.210526	0.0869565	0.166667	0.157895	0.157895	0.166667	0.153846	0.166667	0.157895	0.0526316	0.322581	0.0416667	0.166667	0.15	0.206897	0.157895	0.157895	0	0.0909091	0.333333	0.130435	0.2	0.125	0.210526	0.105263	0.0952381	0	0.333333	0.333333	0.230769	0.047619	0.32	0.157895	0.277778	0.1875	0.214286	0.222222
chlorambucil	0.0769231	0.0740741	0.0909091	0.315789	0.0909091	0.111111	0.181818	0.166667	0.115385	0.333333	0.157895	0.166667	0.166667	0.25	0.181818	0.227273	0.173913	0.130435	0.25	0.04	0.173913	0.190476	0.179487	0.25	0.0833333	0.166667	0.142857	0.285714	0.173913	0.2	0.0740741	0.0869565	0.0333333	0.25	0.210526	0.272727	0.0833333	0.0769231	0.047619	0.0416667	0.269231	0.233333	0.227273	0.407407	0.227273	0.0769231	0.142857	0.1	0.173913
chloramphenicol	0.0833333	0.0384615	0.222222	0.210526	0.1	0.0588235	0.15625	0	0.173913	0.181818	0.0526316	0.238095	0.181818	0.12	0.2	0.136364	0.315789	0.2	0.1	0.263158	0.190476	0.0952381	0.419355	0.12	0.333333	0.181818	0.266667	0.136364	0.0869565	0.1	0.125	0.4375	0.26087	0.178571	0.05	0.3	0.142857	0.130435	0	0.210526	0.347826	0.458333	0.136364	0.333333	0.136364	0.238095	0.1	0.111111	0.190476
chlorcyclizine	0.434783	0.259259	0.16	0.0344828	0.115385	0.0416667	0.294118	0.130435	0.214286	0.1	0.08	0.137931	0.03125	0.09375	0.192308	0.142857	0.185185	0.192308	0.25	0.24	0.103448	0.0714286	0.307692	0.206897	0.291667	0.222222	0.551724	0.185185	0.185185	0.0740741	0.36	0.2	0.44	0.176471	0.12	0.03125	0.24	0.222222	0.08	0.25	0.225806	0.3125	0.142857	0.194444	0.103448	0.222222	0.115385	0.125	0.103448
chlorhexidine	0.185185	0.178571	0.217391	0.16	0.166667	0.0434783	0.433333	0.0416667	0.137931	0.103448	0.0833333	0.103448	0.230769	0.172414	0.111111	0.148148	0.148148	0.304348	0.344828	0.2	0.291667	0.208333	0.666667	0.133333	0.2	0.103448	0.419355	0.148148	0.148148	0.0769231	0.178571	0.26087	0.346154	0.258065	0.0384615	0.230769	0.0714286	0.230769	0.0833333	0.208333	0.233333	0.366667	0.148148	0.4	0.148148	0.28	0.166667	0.130435	0.291667
chlormezanone	0.0555556	0	0.0714286	0.0666667	0.153846	0	0.153846	0.333333	0.25	0.0555556	0.3	0.0555556	0.1875	0.05	0.307692	0.2	0.125	0.214286	0.04	0.133333	0.384615	0.230769	0.15625	0.166667	0.133333	0.1875	0.0689655	0.2	0.125	0.0714286	0.0526316	0.142857	0.1	0.3	0	0.117647	0.133333	0.0555556	0.3	0.333333	0.263158	0.166667	0.0588235	0.16	0.384615	0.357143	0.0714286	0.181818	0.2
chlorogenic acid	0.05	0.1	0.133333	0.285714	0.214286	0.181818	0.0666667	0.0769231	0.047619	0.105263	0.153846	0.166667	0.235294	0.15	0.266667	0.333333	0.176471	0.0555556	0.217391	0.0555556	0.111111	0.0588235	0.0833333	0.0454545	0.0555556	0.235294	0.137931	0.176471	0.25	0.0625	0.047619	0.0588235	0.0434783	0.0769231	0.333333	0.166667	0.266667	0.05	0	0.2	0.181818	0.0714286	0.176471	0.192308	0.25	0.166667	0.214286	0.153846	0.176471
chloropyramine	0.157895	0.277778	0.0588235	0.0555556	0	0	0.178571	0	0.0952381	0.1	0	0	0.047619	0.0909091	0.111111	0.166667	0.166667	0.111111	0.0740741	0.111111	0.05	0	0.176471	0.0909091	0.25	0.1	0.259259	0.166667	0.166667	0.0588235	0.4375	0.1875	0.190476	0.16	0.0625	0	0.111111	0.047619	0.0666667	0.1875	0.173913	0.148148	0	0.185185	0.105263	0.1	0.125	0.0666667	0.166667
chloropyrazine	0.15	0.0909091	0.117647	0.111111	0.357143	0.25	0.0967742	0.333333	0.263158	0.0952381	0.307692	0.277778	0.0952381	0.0869565	0.4	0.294118	0.1	0.235294	0.2	0.166667	0.157895	0.176471	0.138889	0.136364	0.166667	0.277778	0.166667	0.222222	0.157895	0.1875	0.142857	0.111111	0.238095	0.2	0.285714	0.0454545	0.3125	0.0454545	0.214286	0.25	0.166667	0.142857	0.222222	0.178571	0.375	0.15	0.117647	0.307692	0.1
chloroquine	0.0666667	0	0.2	0.181818	0.2	0.333333	0.0384615	0.125	0.133333	0.230769	0.111111	0.142857	0.142857	0.125	0.4	0	0.0714286	0	0.0952381	0	0.0714286	0.181818	0.0967742	0.125	0.0769231	0.0666667	0.037037	0.363636	0	0	0.0625	0.181818	0.117647	0.0952381	0.1	0.0666667	0.166667	0	0	0.0833333	0.105263	0.0869565	0.153846	0.130435	0.0714286	0.0666667	0	0.25	0.0714286
chlorphenamine	0.0555556	0.111111	0	0.142857	0	0.1	0	0	0	0.266667	0	0.1875	0.117647	0.166667	0.133333	0.2	0.285714	0	0.130435	0.0625	0.0588235	0.0666667	0.0571429	0.05	0.0625	0.1875	0.107143	0.2	0.0588235	0	0.111111	0.0666667	0.1	0.130435	0.166667	0.117647	0.214286	0.0555556	0	0.0666667	0.0909091	0.0769231	0.125	0.115385	0.125	0.0555556	0	0.0833333	0.2
chlorphenesin	0.153846	0.24	0.130435	0.125	0.0833333	0	0.518519	0.0454545	0.291667	0.153846	0.0909091	0.0714286	0.304348	0.103448	0.037037	0.26087	0.0357143	0.166667	0.423077	0.217391	0.16	0.173913	0.548387	0.230769	0.0769231	0.153846	0.3125	0.0357143	0.26087	0.181818	0.24	0.08	0.178571	0.321429	0.0869565	0.153846	0.037037	0.25	0.142857	0.125	0.296296	0.258065	0.16	0.333333	0.0740741	0.2	0.3	0.0909091	0.208333
chlorpromazine	0.333333	0.375	0.037037	0	0.037037	0.0434783	0.387097	0.0869565	0.137931	0.103448	0.130435	0.103448	0.103448	0.133333	0.0714286	0.148148	0.107143	0.2	0.3	0.153846	0.148148	0.16	0.428571	0.214286	0.153846	0.0322581	0.466667	0.107143	0.192308	0.12	0.32	0.0740741	0.4	0.344828	0.125	0.0322581	0.111111	0.185185	0.130435	0.16	0.233333	0.322581	0.107143	0.3125	0.148148	0.142857	0.0769231	0.04	0.192308
chlorpropamide	0.0555556	0.111111	0.25	0.0666667	0.153846	0.1	0.111111	0	0.111111	0.0555556	0.0833333	0.117647	0.1875	0.105263	0.133333	0.384615	0.0588235	0.133333	0.0833333	0.307692	0.285714	0.142857	0.193548	0	0.214286	0.0555556	0.0689655	0.125	0.285714	0	0.111111	0.0666667	0.1	0.0833333	0	0.266667	0.133333	0.117647	0	0.0666667	0.263158	0.166667	0.2	0.208333	0.125	0.1875	0.363636	0	0.125
chlorprothixene	0.333333	0.178571	0.166667	0.0740741	0.0769231	0.0434783	0.264706	0.136364	0.178571	0.103448	0.130435	0.142857	0.103448	0.133333	0.2	0.107143	0.107143	0.153846	0.21875	0.2	0.148148	0.115385	0.351351	0.307692	0.25	0.103448	0.466667	0.24	0.192308	0.037037	0.32	0.16	0.4	0.21875	0.125	0.103448	0.2	0.142857	0.04	0.26087	0.275862	0.322581	0.148148	0.3125	0.107143	0.28	0.12	0.0833333	0.148148
chlortalidone	0.0588235	0	0.0769231	0.153846	0.272727	0.111111	0.0357143	0.222222	0.1875	0.285714	0.2	0.2	0.2	0.111111	0.333333	0.214286	0.214286	0	0.0869565	0	0.0625	0	0.0588235	0.111111	0.0666667	0.285714	0.0344828	0.214286	0.214286	0.166667	0	0.0714286	0	0.136364	0.181818	0.285714	0.0666667	0.0588235	0	0.0714286	0.277778	0.125	0.133333	0.217391	0.133333	0.0588235	0.166667	0.0909091	0
chlortetracycline	0.0909091	0.193548	0.185185	0.137931	0.185185	0	0.516129	0.0357143	0.233333	0.241379	0.0714286	0.0909091	0.44	0.1875	0.133333	0.25	0.206897	0.259259	0.30303	0.133333	0.296296	0.222222	0.741935	0.151515	0.133333	0.2	0.297297	0.129032	0.296296	0.185185	0.121212	0.222222	0.147059	0.387097	0.0333333	0.333333	0.030303	0.2	0.153846	0.178571	0.322581	0.363636	0.166667	0.533333	0.206897	0.241379	0.230769	0.111111	0.296296
chlorzoxazone	0.225806	0.258065	0.0967742	0.0606061	0.133333	0	0.580645	0.107143	0.344828	0.1875	0.142857	0.117647	0.266667	0.111111	0.0588235	0.193548	0.193548	0.285714	0.285714	0.16129	0.275862	0.166667	0.75	0.25	0.125	0.266667	0.428571	0.0882353	0.275862	0.259259	0.21875	0.166667	0.242424	0.451613	0.1	0.1875	0.0588235	0.225806	0.185185	0.206897	0.30303	0.424242	0.121212	0.454545	0.193548	0.151515	0.172414	0.0666667	0.193548
chrysin	0.333333	0.611111	0.142857	0.0416667	0.0909091	0.0526316	0.258065	0	0.115385	0.12	0	0.217391	0.12	0.153846	0.0833333	0.125	0.125	0.0833333	0.25	0.0833333	0	0.0416667	0.210526	0.111111	0.04	0.0769231	0.37931	0.0384615	0.08	0.0434783	0.16	0.0416667	0.192308	0.09375	0.0952381	0.12	0.130435	0.4	0.047619	0	0.0645161	0.15625	0.173913	0.151515	0.173913	0.166667	0.0909091	0.047619	0.08
ciclacillin	0	0	0.333333	0.214286	0.230769	0.0909091	0.148148	0.181818	0.105263	0.0526316	0.166667	0.0526316	0.176471	0.157895	0.2	0.0555556	0.117647	0.384615	0.08	0.0588235	0.461538	0.307692	0.310345	0.157895	0.285714	0.0526316	0.142857	0.266667	0.1875	0.142857	0.105263	0.307692	0.210526	0.173913	0	0.176471	0.125	0	0.166667	0.416667	0.190476	0.208333	0.117647	0.304348	0.1875	0.25	0.142857	0.166667	0.1875
cicloheximide	0.12	0.16	0.142857	0.0416667	0.0434783	0.0526316	0.3	0.105263	0.26087	0.166667	0.1	0.12	0.166667	0.153846	0.0833333	0.173913	0.125	0.130435	0.09375	0.181818	0.35	0.190476	0.393939	0.304348	0.181818	0.12	0.25	0.173913	0.125	0.2	0.16	0.136364	0.148148	0.296296	0	0.12	0.181818	0.12	0.157895	0.136364	0.269231	0.37037	0.125	0.266667	0.173913	0.166667	0.0434783	0	0.125
ciclopirox	0.363636	0.291667	0.0833333	0	0.130435	0	0.322581	0	0.192308	0.111111	0	0.153846	0.153846	0.185185	0.037037	0.115385	0.115385	0.12	0.233333	0.272727	0.0357143	0	0.333333	0.185185	0.12	0.153846	0.4	0.0357143	0.16	0.130435	0.291667	0.08	0.32	0.193548	0.0869565	0.0714286	0.166667	0.304348	0.0909091	0.125	0.206897	0.181818	0.115385	0.111111	0.0357143	0.0714286	0.130435	0.0434783	0.0740741
ciclosporin	0.35	0.333333	0.210526	0.0434783	0.15	0.0555556	0.310345	0	0.166667	0.125	0	0.08	0.173913	0.0357143	0.190476	0.0833333	0.130435	0.136364	0.133333	0.0416667	0.130435	0.0909091	0.285714	0.16	0.136364	0.173913	0.258065	0.238095	0.130435	0.0454545	0.272727	0.2	0.25	0.172414	0	0.125	0.0869565	0.227273	0.105263	0.0434783	0.103448	0.2	0.0833333	0.15625	0.130435	0.125	0.0952381	0.105263	0
cimetidine	0	0	0.1875	0.176471	0.117647	0.0714286	0.172414	0.142857	0.263158	0.4375	0.133333	0.0952381	0.15	0.136364	0.166667	0.1	0.375	0.235294	0.153846	0.05	0.294118	0.333333	0.322581	0.25	0.105263	0.210526	0.166667	0.222222	0.1	0.357143	0.142857	0.428571	0.130435	0.2	0.0588235	0.277778	0.05	0	0.0625	0.0526316	0.166667	0.28	0.294118	0.375	0.1	0.0952381	0.117647	0.0625	0.157895
cinchocaine	0.176471	0.105263	0.0666667	0	0.0666667	0	0.107143	0	0.105263	0.176471	0	0.0526316	0.111111	0.222222	0.0588235	0.117647	0.117647	0	0.173913	0.0588235	0	0.0625	0.0555556	0.294118	0.125	0	0.142857	0.0555556	0.1875	0.142857	0.235294	0	0.15	0.08	0	0.111111	0.0588235	0.111111	0.0769231	0	0.136364	0.0740741	0.1875	0.0344828	0.0555556	0.0526316	0.0666667	0	0.0555556
cinchonidine	0.0416667	0	0.166667	0.1	0.235294	0.0625	0.16129	0.2	0.181818	0.25	0.117647	0.136364	0.190476	0.08	0.352941	0.0909091	0.263158	0.210526	0.0666667	0.0952381	0.333333	0.157895	0.30303	0.227273	0.15	0.25	0.15625	0.333333	0.142857	0.105263	0.181818	0.375	0.166667	0.230769	0.0526316	0.190476	0.210526	0.0869565	0.117647	0.294118	0.428571	0.307692	0.142857	0.25	0.142857	0.25	0.05	0.1875	0.142857
cinchonine	0.0416667	0.04	0.05	0.222222	0.105263	0.0625	0.2	0.2	0.238095	0.25	0.266667	0.190476	0.190476	0.125	0.210526	0.142857	0.263158	0.15	0.142857	0.0952381	0.263158	0.047619	0.264706	0.35	0.0454545	0.190476	0.193548	0.333333	0.0909091	0.235294	0.0833333	0.222222	0.0769231	0.185185	0.176471	0.25	0.0454545	0.0416667	0.0555556	0.1	0.304348	0.416667	0.0434783	0.458333	0.333333	0.190476	0.05	0.117647	0.142857
cinnarizine	0.105263	0.1	0.0625	0.0588235	0	0	0.142857	0.166667	0.157895	0.235294	0.25	0.105263	0.166667	0	0.0555556	0.176471	0.176471	0.266667	0.0769231	0.117647	0.25	0.0588235	0.258065	0.210526	0.0555556	0.235294	0.222222	0.25	0.176471	0.133333	0.157895	0.125	0.0909091	0.272727	0.142857	0.166667	0.0555556	0.05	0.0714286	0.125	0.238095	0.304348	0.111111	0.347826	0.176471	0.166667	0.133333	0.0714286	0.0526316
cinoxacin	0	0	0.214286	0.285714	0.133333	0	0.230769	0	0.157895	0.3125	0.0714286	0.105263	0.3125	0.15	0.1875	0.176471	0.333333	0.1875	0.12	0.1875	0.25	0.2	0.3	0.15	0.117647	0.235294	0.1	0.0526316	0.111111	0.214286	0	0.384615	0.0434783	0.12	0	0.4	0.117647	0	0	0.125	0.3	0.25	0.25	0.291667	0.176471	0.166667	0.133333	0.153846	0.333333
ciprofibrate	0.0526316	0	0.142857	0.307692	0.230769	0.2	0.148148	0.3	0.235294	0.111111	0.4	0.176471	0.176471	0.157895	0.5	0.117647	0.0555556	0.125	0.125	0.125	0.266667	0.307692	0.1875	0.157895	0.2	0.111111	0.0322581	0.357143	0.0555556	0.0666667	0.105263	0.214286	0.0952381	0.227273	0.0714286	0.176471	0.2	0	0.166667	0.307692	0.25	0.16	0.0555556	0.25	0.357143	0.333333	0	0.4	0.266667
ciprofloxacin	0.0625	0	0.181818	0	0.0833333	0.125	0.037037	0	0.125	0.0625	0.1	0.416667	0.0625	0.0555556	0.0714286	0.0666667	0.142857	0.153846	0	0.153846	0.230769	0.0769231	0.129032	0.0555556	0.0714286	0.0625	0.115385	0.142857	0	0	0.0588235	0.166667	0.176471	0.142857	0.0909091	0.133333	0.153846	0.133333	0	0.166667	0.047619	0.130435	0.333333	0.08	0.0666667	0.214286	0	0	0.0666667
cisapride	0.217391	0.16	0.0909091	0.136364	0.263158	0.111111	0.181818	0.105263	0.0740741	0.12	0.157895	0.217391	0.166667	0.25	0.238095	0.227273	0.173913	0.181818	0.346154	0.130435	0.173913	0.136364	0.179487	0.2	0.181818	0.166667	0.25	0.227273	0.285714	0.142857	0.208333	0.0416667	0.24	0.206897	0.15	0.12	0.238095	0.12	0.157895	0.136364	0.269231	0.121212	0.173913	0.225806	0.35	0.12	0.0909091	0.222222	0.125
citalopram	0.176471	0.105263	0.142857	0	0.0666667	0.2	0.0689655	0.0833333	0.166667	0.25	0	0.333333	0	0.047619	0.125	0.0555556	0.0555556	0.0588235	0.08	0.0588235	0.0555556	0.133333	0.0857143	0.222222	0.0588235	0.176471	0.142857	0.1875	0.0555556	0.0666667	0.166667	0.0625	0.15	0.173913	0.153846	0.0526316	0.285714	0.111111	0	0.133333	0.0869565	0.115385	0.357143	0.0344828	0	0.0526316	0	0	0
citiolone	0.0625	0.0588235	0	0	0	0.125	0.037037	0.25	0.125	0.416667	0.1	0.133333	0.0625	0.117647	0.0714286	0.142857	0.230769	0	0.142857	0	0	0.0769231	0.0294118	0.1875	0	0.214286	0.115385	0.142857	0.0666667	0.0833333	0.0588235	0	0.0526316	0.142857	0.2	0.0625	0.153846	0.0625	0	0.0769231	0.047619	0.04	0.230769	0.08	0	0	0.0833333	0	0.0666667
clebopride	0	0	0.153846	0.6	0.153846	0.1	0.0344828	0	0	0.117647	0.0833333	0.1875	0.117647	0.235294	0.307692	0.2	0.0588235	0.0625	0.130435	0.133333	0.0588235	0.0666667	0.0571429	0.05	0.133333	0.117647	0.0333333	0.285714	0.0588235	0	0.0526316	0.142857	0	0.0833333	0.166667	0.266667	0.0625	0.0555556	0	0.0666667	0.2	0.037037	0.125	0.208333	0.285714	0.1875	0.153846	0.3	0.2
clemastine	0.315789	0.181818	0.105263	0.047619	0.3125	0.133333	0.2	0	0.181818	0.0869565	0.0555556	0.315789	0.136364	0.125	0.210526	0.0434783	0.142857	0.15	0.142857	0.15	0.0909091	0.047619	0.228571	0.173913	0.0952381	0.190476	0.321429	0.142857	0.0909091	0.105263	0.368421	0.157895	0.333333	0.103448	0.176471	0.0869565	0.210526	0.136364	0.0555556	0.1	0.153846	0.172414	0.2	0.129032	0.0909091	0.0416667	0.05	0.117647	0.0434783
clemizole	0.263158	0.136364	0.176471	0.105263	0	0	0.129032	0.0625	0.136364	0.2	0	0.0434783	0.0909091	0.130435	0.157895	0.0454545	0.15	0.047619	0.24	0.157895	0.0454545	0.05	0.2	0.3	0.1	0.0909091	0.384615	0.210526	0.0454545	0	0.190476	0.166667	0.421053	0.107143	0.0555556	0.0909091	0.157895	0.0909091	0	0.166667	0.208333	0.32	0.0454545	0.172414	0.0454545	0.2	0.0526316	0.0588235	0.0952381
clenbuterol	0.0555556	0.0526316	0.0714286	0.142857	0.0714286	0	0.111111	0.0909091	0.0526316	0.0555556	0.0833333	0.0555556	0.0555556	0.3125	0.133333	0.2	0.125	0.0625	0.130435	0.214286	0.0588235	0.0666667	0.121212	0.05	0.545455	0.0555556	0.148148	0.125	0.2	0.0714286	0.25	0.142857	0.157895	0.181818	0.0769231	0.0555556	0.133333	0	0.181818	0.230769	0.263158	0.037037	0	0.16	0.125	0.117647	0.0714286	0.181818	0.285714
clidinium bromide	0	0.0588235	0.0833333	0.0769231	0.0833333	0.285714	0.037037	0.111111	0.125	0.133333	0.1	0.307692	0	0.117647	0.0714286	0.0666667	0.0666667	0.0714286	0.0434783	0	0.142857	0.166667	0.0606061	0.117647	0.153846	0.0625	0.0740741	0.142857	0	0.0833333	0.2	0.0769231	0.0526316	0.142857	0.0909091	0.133333	0.153846	0.0625	0.1	0	0.1	0.04	0.142857	0.08	0.0666667	0	0	0	0
clindamycin	0.0833333	0.125	0.157895	0.0952381	0.047619	0	0.275862	0.0555556	0.227273	0.3	0.0526316	0.04	0.238095	0.0769231	0.0909091	0.136364	0.25	0.2	0.1	0.0434783	0.25	0.0952381	0.466667	0.166667	0.142857	0.238095	0.225806	0.190476	0.136364	0.222222	0.227273	0.352941	0.115385	0.32	0.05	0.238095	0	0.130435	0.176471	0.0952381	0.291667	0.4	0	0.333333	0.0869565	0.0833333	0.1	0.0526316	0.136364
clioquinol	0.137931	0.133333	0.26087	0.111111	0.115385	0.0416667	0.294118	0.04	0.172414	0.222222	0.0384615	0.1	0.269231	0.09375	0.107143	0.103448	0.28	0.148148	0.176471	0.0689655	0.230769	0.153846	0.5	0.25	0.148148	0.222222	0.40625	0.142857	0.185185	0.115385	0.0967742	0.25	0.2	0.142857	0.037037	0.222222	0.0689655	0.222222	0.0384615	0.153846	0.225806	0.4	0.185185	0.34375	0.0666667	0.178571	0.16	0.0384615	0.103448
clobetasol	0.111111	0.166667	0.0666667	0.0625	0.333333	0	0.291667	0.181818	0.235294	0.111111	0.166667	0.111111	0.25	0.222222	0.125	0.1875	0.117647	0.5	0.227273	0.125	0.266667	0.214286	0.266667	0.047619	0.2	0.176471	0.185185	0.117647	0.266667	0.333333	0.3125	0.0625	0.0952381	0.173913	0	0.111111	0.0588235	0.0526316	0.4	0.133333	0.190476	0.115385	0.117647	0.25	0.1875	0.0526316	0.230769	0.166667	0.1875
clofazimine	0.333333	0.208333	0.0909091	0.0416667	0.142857	0.0526316	0.21875	0	0.208333	0.037037	0.047619	0.217391	0.12	0.0714286	0.130435	0.125	0.08	0.181818	0.206897	0.3	0.125	0.0416667	0.352941	0.2	0.238095	0.12	0.37931	0.0384615	0.08	0.142857	0.380952	0.190476	0.409091	0.129032	0.0952381	0.12	0.181818	0.166667	0.047619	0.0869565	0.269231	0.423077	0.08	0.225806	0.125	0.12	0.0909091	0.047619	0.125
clofibrate	0.307692	0.296296	0.111111	0.107143	0.111111	0	0.5	0.0384615	0.296296	0.214286	0.037037	0.172414	0.36	0.125	0.103448	0.178571	0.137931	0.185185	0.242424	0.185185	0.178571	0.0689655	0.575758	0.241379	0.103448	0.259259	0.277778	0.1	0.178571	0.153846	0.166667	0.107143	0.193548	0.322581	0.0357143	0.259259	0.103448	0.36	0.12	0.192308	0.3	0.433333	0.1	0.257143	0.1	0.172414	0.153846	0.0769231	0.137931
clofilium tosylate	0.315789	0.3	0.05	0.047619	0	0	0.333333	0	0.0833333	0	0.0555556	0.0416667	0.0416667	0.08	0	0.0909091	0.0909091	0.15	0.230769	0.210526	0.142857	0	0.34375	0.285714	0.210526	0	0.423077	0.0434783	0.0909091	0.05	0.238095	0.157895	0.333333	0.142857	0.0526316	0.0869565	0.0454545	0.25	0	0.1	0.25	0.307692	0	0.25	0.142857	0.190476	0.105263	0	0.142857
clomifene	0.259259	0.25	0.111111	0.148148	0.0344828	0	0.5	0.08	0.206897	0.172414	0.0769231	0.0967742	0.214286	0.241379	0.0666667	0.178571	0.1	0.185185	0.366667	0.230769	0.137931	0.192308	0.485714	0.384615	0.185185	0.0625	0.483871	0.1	0.137931	0.2	0.296296	0.0689655	0.233333	0.242424	0	0.172414	0.0666667	0.214286	0.12	0.107143	0.3	0.387097	0.137931	0.375	0.178571	0.214286	0.111111	0.0769231	0.222222
clomipramine	0.321429	0.357143	0.137931	0.030303	0.0645161	0.0740741	0.411765	0.0344828	0.225806	0.121212	0.0689655	0.193548	0.0882353	0.147059	0.0606061	0.16129	0.125	0.09375	0.333333	0.166667	0.0909091	0.030303	0.410256	0.21875	0.166667	0.121212	0.580645	0.0909091	0.2	0.0645161	0.310345	0.0967742	0.290323	0.157895	0.185185	0.0882353	0.206897	0.321429	0.0333333	0.0967742	0.2	0.277778	0.16129	0.175	0.0909091	0.0882353	0.178571	0	0.125
clonidine	0.0526316	0.105263	0.0666667	0.307692	0.142857	0.2	0.0689655	0	0.05	0.111111	0.0769231	0.25	0.111111	0.294118	0.2	0.0555556	0.117647	0.0588235	0.227273	0.2	0.0555556	0	0.117647	0.222222	0.125	0.0526316	0.142857	0.1875	0	0.142857	0.105263	0.214286	0.0952381	0	0.25	0.176471	0.2	0.0526316	0	0	0.190476	0.16	0	0.2	0.1875	0.176471	0	0.166667	0.117647
clopamide	0.0740741	0.0714286	0.190476	0.181818	0.136364	0	0.333333	0.1	0.2	0.208333	0.15	0.115385	0.318182	0.192308	0.125	0.12	0.166667	0.285714	0.285714	0.125	0.333333	0.368421	0.566667	0.148148	0.125	0.16	0.28125	0.166667	0.217391	0.136364	0.0714286	0.181818	0.185185	0.333333	0.0434783	0.26087	0.0384615	0.115385	0.15	0.238095	0.307692	0.357143	0.166667	0.5	0.166667	0.208333	0.190476	0.0952381	0.272727
cloperastine	0.36	0.296296	0.2	0.0689655	0.0714286	0	0.40625	0.08	0.166667	0.172414	0.037037	0.0625	0.0967742	0.0588235	0.103448	0.1	0.1	0.142857	0.242424	0.142857	0.0645161	0.0333333	0.368421	0.384615	0.142857	0.172414	0.533333	0.0645161	0.178571	0.153846	0.25	0.148148	0.233333	0.108108	0.0740741	0.0967742	0.142857	0.259259	0.037037	0.107143	0.3	0.433333	0.137931	0.257143	0.1	0.133333	0.153846	0.0769231	0.0645161
clorgiline	0.157895	0.210526	0.125	0.0555556	0.0588235	0.0769231	0.1	0	0.0952381	0.157895	0	0.157895	0.1	0.263158	0.0526316	0.235294	0.05	0.0526316	0.26087	0.176471	0.05	0.117647	0.0810811	0.263158	0.0526316	0	0.172414	0	0.105263	0.125	0.15	0	0.136364	0.0740741	0.0625	0.157895	0.176471	0.157895	0.0666667	0	0.125	0.0333333	0.3125	0.0666667	0.05	0.157895	0.125	0	0.105263
clorsulon	0.0555556	0	0.153846	0.230769	0.153846	0.222222	0.0344828	0	0.111111	0.117647	0.181818	0.357143	0.1875	0.166667	0.214286	0.0588235	0.125	0.133333	0.130435	0.133333	0.2	0.142857	0.193548	0.05	0.0625	0.0555556	0.148148	0.384615	0	0	0.0526316	0.230769	0.222222	0.181818	0.272727	0.117647	0.133333	0	0	0.142857	0.0909091	0.166667	0.2	0.26087	0.2	0.1875	0	0.181818	0.2
clotrimazole	0.380952	0.304348	0.190476	0.130435	0	0	0.290323	0.047619	0.153846	0.16	0.0454545	0.0357143	0.115385	0.148148	0.08	0.12	0.166667	0.125	0.241379	0.125	0.12	0.130435	0.305556	0.347826	0.173913	0.115385	0.366667	0.037037	0.12	0.0869565	0.153846	0.130435	0.28	0.0909091	0.0434783	0.16	0.08	0.208333	0.0454545	0.04	0.133333	0.225806	0.166667	0.258065	0.0769231	0.0740741	0.190476	0.0454545	0.12
cloxacillin	0	0.125	0.0833333	0	0.0833333	0.125	0.0769231	0	0.0588235	0.214286	0	0.133333	0.133333	0.117647	0.0714286	0.230769	0.0666667	0	0.142857	0	0	0.0769231	0.0606061	0.117647	0	0	0.0357143	0	0.142857	0.181818	0.0588235	0	0	0.0909091	0.0909091	0.133333	0.0714286	0.133333	0.1	0	0.1	0.0833333	0.230769	0.0384615	0.0666667	0.0625	0.0833333	0	0.0666667
clozapine	0.0833333	0.125	0.222222	0.15	0.047619	0.0588235	0.193548	0.0555556	0.173913	0.130435	0.0526316	0.130435	0.04	0.217391	0.142857	0.0416667	0.25	0.142857	0.0645161	0.142857	0.190476	0.0952381	0.257143	0.272727	0.2	0.04	0.310345	0.25	0.0869565	0.1	0.35	0.352941	0.26087	0.1	0.105263	0.181818	0.142857	0.0833333	0.0526316	0.0952381	0.192308	0.296296	0.0869565	0.241379	0.136364	0.181818	0.047619	0.0526316	0.136364
cobalt chloride	0.0869565	0.130435	0.05	0.157895	0.05	0.133333	0.0588235	0	0	0.0869565	0.0555556	0.315789	0.0416667	0.285714	0.0952381	0.142857	0.142857	0.0454545	0.142857	0.210526	0.0434783	0	0.102564	0.08	0.15	0.0869565	0.193548	0.2	0.142857	0	0.130435	0	0.217391	0.103448	0.25	0.136364	0.210526	0.0869565	0	0.1	0.153846	0.259259	0.0909091	0.166667	0.0909091	0.0869565	0.05	0.0555556	0.0434783
co-dergocrine mesilate	0.125	0.272727	0.210526	0.0434783	0.210526	0.117647	0.1875	0	0.166667	0.173913	0	0.227273	0.227273	0.208333	0.190476	0.181818	0.181818	0.136364	0.214286	0.25	0.130435	0.0434783	0.285714	0.16	0.190476	0.125	0.3	0.181818	0.130435	0.15	0.333333	0.2	0.304348	0.0967742	0.047619	0.125	0.315789	0.125	0.105263	0.142857	0.230769	0.241379	0.130435	0.15625	0.04	0.227273	0.0952381	0.105263	0.04
colchicine	0.107143	0.185185	0.173913	0.166667	0.125	0.0454545	0.272727	0	0.142857	0.148148	0	0.0689655	0.24	0.137931	0.16	0.25	0.153846	0.16	0.225806	0.16	0.2	0.12	0.4	0.32	0.16	0.148148	0.34375	0.0714286	0.153846	0.173913	0.142857	0.272727	0.172414	0.151515	0.0833333	0.192308	0.16	0.107143	0.0869565	0.166667	0.333333	0.25	0.153846	0.28125	0.153846	0.192308	0.173913	0.0869565	0.2
colecalciferol	0.0689655	0.103448	0.125	0.12	0.173913	0.0454545	0.3125	0.0434783	0.185185	0.192308	0.136364	0.192308	0.347826	0.222222	0.115385	0.153846	0.2	0.16	0.310345	0.16	0.25	0.166667	0.580645	0.0645161	0.0740741	0.24	0.34375	0.2	0.153846	0.08	0.103448	0.166667	0.259259	0.407407	0.181818	0.192308	0.0740741	0.148148	0.136364	0.272727	0.241379	0.333333	0.111111	0.366667	0.153846	0.24	0.08	0.0869565	0.304348
colforsin	0.263158	0.315789	0.0526316	0.05	0.111111	0.0666667	0.25	0	0.136364	0.142857	0	0.2	0.263158	0.238095	0.047619	0.15	0.0952381	0.157895	0.409091	0.157895	0.0454545	0.105263	0.272727	0.0833333	0.047619	0.142857	0.241379	0	0.0952381	0.111111	0.190476	0	0.285714	0.291667	0.117647	0.0909091	0.294118	0.2	0.125	0.166667	0.0740741	0.1	0.210526	0.0967742	0.0454545	0.0909091	0.111111	0.0588235	0.15
colistin	0.0625	0	0.181818	0.272727	0.0833333	0.125	0.037037	0	0.0588235	0.133333	0	0.214286	0.133333	0.117647	0.25	0.0666667	0.142857	0.0714286	0.0434783	0.153846	0.0666667	0.166667	0.129032	0.117647	0.153846	0.133333	0.0357143	0.142857	0	0	0.0588235	0.272727	0.111111	0.0909091	0.0909091	0.214286	0.25	0.0625	0	0.272727	0.1	0.0833333	0.230769	0.08	0.0666667	0.214286	0	0.222222	0.142857
conessine	0.0526316	0	0.142857	0.133333	0.0666667	0.0909091	0.0689655	0.0833333	0.105263	0.176471	0.0769231	0.176471	0.0526316	0.222222	0.125	0.1875	0.461538	0.125	0.08	0.2	0.117647	0.133333	0.151515	0.157895	0.384615	0.176471	0.185185	0.117647	0.1875	0.142857	0.105263	0.214286	0.210526	0.08	0.153846	0.111111	0.2	0.0526316	0	0.214286	0.0869565	0.115385	0.357143	0.153846	0.117647	0.0526316	0.142857	0.0769231	0.1875
convolamine	0.1	0.0454545	0.2	0.0555556	0.2	0.0769231	0.178571	0.0714286	0.210526	0.047619	0.142857	0.157895	0.294118	0	0.176471	0.235294	0.166667	0.25	0.0357143	0.176471	0.5	0.1875	0.290323	0.0909091	0.111111	0.294118	0.133333	0.166667	0.166667	0.0588235	0.0952381	0.1875	0.190476	0.318182	0.0625	0.157895	0.25	0.1	0.142857	0.266667	0.285714	0.192308	0.235294	0.142857	0.235294	0.222222	0.125	0.0666667	0.105263
copper sulfate	0.136364	0	0.105263	0.047619	0.3125	0.133333	0.0909091	0.125	0.181818	0.25	0.117647	0.25	0.190476	0.173913	0.277778	0	0.142857	0.15	0.142857	0.0454545	0.2	0.222222	0.194444	0.173913	0.0952381	0.315789	0.121212	0.263158	0.0909091	0.05	0.0833333	0.1	0.272727	0.230769	0.111111	0.0869565	0.210526	0.0416667	0.117647	0.222222	0.111111	0.172414	0.263158	0.129032	0.0909091	0.0416667	0.05	0.117647	0.0909091
coralyne	0.0434783	0.0416667	0.111111	0.235294	0.176471	0.0666667	0.206897	0.133333	0.25	0.2	0.2	0.2	0.2	0.3	0.222222	0.210526	0.277778	0.1	0.192308	0.157895	0.15	0.105263	0.166667	0.0833333	0.047619	0.2	0.16129	0.277778	0.15	0.111111	0.0416667	0.166667	0.0384615	0.148148	0.1875	0.333333	0.1	0.0434783	0	0.166667	0.16	0.178571	0.15	0.307692	0.210526	0.263158	0.176471	0.0588235	0.210526
corbadrine	0.1	0.0952381	0.125	0.266667	0.0588235	0	0.269231	0	0.210526	0.1	0.0666667	0.1	0.375	0.2	0.111111	0.3125	0.105263	0.111111	0.208333	0.428571	0.166667	0.117647	0.290323	0.263158	0.25	0.157895	0.133333	0.05	0.05	0.2	0.210526	0.1875	0.190476	0.208333	0	0.222222	0.111111	0.047619	0.230769	0.1875	0.285714	0.192308	0	0.230769	0.235294	0.294118	0.0588235	0.230769	0.3125
corticosterone	0.0869565	0.0833333	0.105263	0.1	0.166667	0.214286	0.125	0.125	0.238095	0.388889	0.117647	0.190476	0.25	0.227273	0.277778	0.142857	0.2	0.0454545	0.185185	0.0454545	0.142857	0.157895	0.194444	0.173913	0.15	0.190476	0.15625	0.411765	0.0909091	0.166667	0.3	0.157895	0.12	0.230769	0.111111	0.136364	0.210526	0	0.117647	0.047619	0.25	0.214286	0.0909091	0.206897	0.0909091	0.0416667	0	0.117647	0.0909091
cortisone	0.111111	0.105263	0.0666667	0	0.0666667	0.0909091	0.24	0.181818	0.4	0.333333	0.0769231	0.0526316	0.111111	0.047619	0.125	0.117647	0.0555556	0.0588235	0.227273	0	0.117647	0.214286	0.1875	0.222222	0.125	0.25	0.0666667	0.1875	0.266667	0.230769	0.235294	0.0625	0.0454545	0.285714	0.0714286	0	0.125	0.111111	0.166667	0.0625	0.136364	0.115385	0.1875	0.111111	0	0	0.230769	0	0.0555556
corynanthine	0.0416667	0.04	0	0.222222	0.105263	0.133333	0.0909091	0.0588235	0.0833333	0.315789	0.0555556	0.25	0.136364	0.285714	0.210526	0.142857	0.5	0.0952381	0.142857	0.0454545	0.142857	0.047619	0.131579	0.125	0.15	0.25	0.15625	0.411765	0.0909091	0.105263	0.0833333	0.222222	0.0769231	0.185185	0.176471	0.190476	0.15	0.0416667	0	0.157895	0.153846	0.214286	0.0909091	0.25	0.2	0.0869565	0	0.117647	0.2
cotinine	0.0526316	0.166667	0.0666667	0.0625	0.142857	0.0909091	0.24	0	0.3125	0.176471	0.0769231	0.176471	0.333333	0.157895	0.0588235	0.357143	0.0555556	0.125	0.173913	0.285714	0.357143	0.307692	0.266667	0.1	0.0588235	0.176471	0.0322581	0.117647	0.117647	0.230769	0.166667	0.0625	0.0952381	0.285714	0	0.176471	0.125	0	0.272727	0	0.136364	0.115385	0.1875	0.2	0.117647	0.111111	0.0666667	0.0769231	0.1875
CP-319743	0.26087	0.2	0.0869565	0.04	0.0416667	0	0.37931	0.1	0.25	0.16	0.0952381	0.0357143	0.208333	0.192308	0.125	0.12	0.0769231	0.08	0.44	0.173913	0.12	0.181818	0.424242	0.192308	0.173913	0.115385	0.28125	0.0769231	0.166667	0.0416667	0.2	0.04	0.333333	0.333333	0	0.115385	0.125	0.26087	0.15	0.181818	0.214286	0.310345	0.037037	0.181818	0.0769231	0.208333	0.136364	0.0454545	0.217391
CP-320650-01	0.16	0.153846	0.315789	0.130435	0.315789	0.105263	0.176471	0.047619	0.111111	0.0357143	0.0952381	0.26087	0.115385	0.192308	0.227273	0.166667	0.12	0.227273	0.285714	0.35	0.166667	0.0833333	0.305556	0.0689655	0.227273	0.208333	0.366667	0.217391	0.166667	0.0416667	0.153846	0.181818	0.391304	0.16129	0.142857	0.0740741	0.285714	0.208333	0.0952381	0.3	0.214286	0.1875	0.217391	0.181818	0.272727	0.380952	0.136364	0.210526	0.12
CP-645525-01	0.241379	0.233333	0.103448	0.03125	0.142857	0	0.516129	0.115385	0.321429	0.16129	0.111111	0.125	0.241379	0.117647	0.0967742	0.129032	0.206897	0.214286	0.30303	0.172414	0.166667	0.137931	0.636364	0.1875	0.133333	0.285714	0.548387	0.129032	0.25	0.103448	0.193548	0.137931	0.3	0.387097	0.107143	0.125	0.0967742	0.241379	0.111111	0.269231	0.242424	0.363636	0.129032	0.352941	0.129032	0.2	0.185185	0.0714286	0.166667
CP-690334-01	0.16	0.25	0.136364	0.04	0.190476	0.166667	0.142857	0.1	0.2	0.16	0.15	0.318182	0.115385	0.148148	0.227273	0.166667	0.217391	0.08	0.2	0.125	0.12	0.0833333	0.205128	0.192308	0.08	0.16	0.28125	0.166667	0.166667	0.136364	0.25	0.0833333	0.230769	0.125	0.2	0.16	0.227273	0.26087	0.0454545	0.04	0.172414	0.225806	0.272727	0.147059	0.12	0.208333	0.0869565	0.0454545	0
CP-863187	0.115385	0.2	0.190476	0.0833333	0.25	0.05	0.37931	0.1	0.25	0.115385	0.15	0.115385	0.318182	0.192308	0.125	0.272727	0.0769231	0.227273	0.44	0.227273	0.272727	0.368421	0.46875	0.107143	0.173913	0.16	0.205882	0.0769231	0.4	0.136364	0.111111	0.04	0.230769	0.333333	0.0434783	0.16	0.125	0.208333	0.15	0.181818	0.214286	0.151515	0.333333	0.344828	0.166667	0.26087	0.388889	0.0952381	0.217391
CP-944629	0.0769231	0.208333	0.142857	0.0869565	0.142857	0	0.444444	0.05	0.16	0.12	0.1	0.037037	0.333333	0.25	0.0833333	0.227273	0.0384615	0.181818	0.458333	0.238095	0.227273	0.315789	0.483871	0.111111	0.130435	0.0769231	0.176471	0.0384615	0.35	0.0909091	0.115385	0	0.192308	0.346154	0	0.166667	0.0833333	0.272727	0.157895	0.190476	0.269231	0.193548	0.227273	0.266667	0.125	0.333333	0.333333	0.047619	0.285714
cromoglicic acid	0.0526316	0.105263	0.142857	0.133333	0.142857	0.0909091	0.192308	0.0833333	0.05	0	0.166667	0.176471	0.111111	0.157895	0.0588235	0.266667	0	0.2	0.173913	0.2	0.266667	0.133333	0.1875	0	0.125	0.0526316	0.185185	0.117647	0.1875	0	0.05	0.0625	0.0952381	0.125	0.25	0.111111	0.125	0.0526316	0.0769231	0.214286	0.190476	0.0740741	0.117647	0.25	0.1875	0.111111	0.230769	0.0769231	0.357143
crotamiton	0	0	0.0625	0.2	0.0625	0	0.142857	0.0769231	0.157895	0.5	0.0714286	0.166667	0.105263	0.277778	0.0555556	0.111111	0.428571	0.117647	0.166667	0.0555556	0.111111	0.2	0.181818	0.210526	0.117647	0.235294	0.1	0.0526316	0.111111	0.307692	0.047619	0.2	0.0434783	0.166667	0.0666667	0.4	0	0.05	0	0	0.130435	0.153846	0.333333	0.291667	0.0526316	0	0.133333	0	0.176471
cyanocobalamin	0.0588235	0	0.166667	0.153846	0.0769231	0	0.0740741	0.1	0.0555556	0.384615	0	0.0588235	0.2	0.111111	0.230769	0.0625	0.0625	0	0.0869565	0	0	0.153846	0.0909091	0.176471	0.0666667	0.125	0.0344828	0.214286	0.133333	0.0769231	0.0555556	0.0714286	0.05	0.25	0	0.2	0.0666667	0.0588235	0	0.0714286	0.277778	0.125	0.214286	0.166667	0.0625	0.125	0.0769231	0.0909091	0.0625
cyclic adenosine monophosphate	0.0526316	0.05	0.0666667	0.214286	0.142857	0.2	0.0689655	0	0.05	0.0526316	0.166667	0.333333	0.25	0.222222	0.125	0.1875	0.0555556	0.0588235	0.227273	0.125	0.0555556	0.133333	0.117647	0	0	0.0526316	0.142857	0.117647	0.0555556	0	0	0	0.15	0.173913	0.363636	0.176471	0.125	0.0526316	0	0.133333	0.0869565	0.115385	0.1875	0.2	0.266667	0.176471	0.0666667	0.0769231	0.266667
cyclizine	0.166667	0.157895	0.0625	0	0.133333	0.0833333	0.103448	0	0.222222	0.166667	0.0714286	0.235294	0.235294	0	0.1875	0.25	0.111111	0.0555556	0.12	0.117647	0.111111	0.0588235	0.181818	0.0952381	0	0.166667	0.1	0.0526316	0.25	0.133333	0.1	0.0588235	0.142857	0.217391	0.142857	0.235294	0.1875	0.105263	0	0.0588235	0.238095	0.25	0.176471	0.148148	0.111111	0.105263	0.133333	0	0.0526316
cyclobenzaprine	0.2	0.136364	0.0526316	0.166667	0.25	0.142857	0.166667	0.0625	0.136364	0	0.2	0.263158	0.0909091	0.238095	0.294118	0.15	0.0952381	0.1	0.192308	0.222222	0.15	0.105263	0.166667	0.130435	0.375	0.0909091	0.2	0.210526	0.0952381	0.0526316	0.315789	0.166667	0.285714	0.192308	0.117647	0.0909091	0.222222	0	0.125	0.105263	0.208333	0.0645161	0.0454545	0.259259	0.352941	0.142857	0	0.285714	0.210526
cyclopenthiazide	0.05	0.1	0.133333	0.125	0.133333	0.181818	0.0666667	0.0769231	0.157895	0.235294	0	0.3125	0.105263	0.277778	0.1875	0.176471	0.176471	0.0555556	0.166667	0.1875	0.111111	0.2	0.147059	0.0952381	0.117647	0.105263	0.137931	0.176471	0.0526316	0.0625	0.047619	0.125	0.142857	0.0769231	0.142857	0.166667	0.266667	0.05	0	0.125	0.130435	0.111111	0.25	0.192308	0.0526316	0.05	0.133333	0	0.176471
cyclopentolate	0.0625	0.125	0	0.0769231	0.0833333	0	0.166667	0.25	0.285714	0.214286	0.222222	0.0625	0.214286	0.117647	0	0.230769	0.0666667	0.153846	0.2	0.0714286	0.0666667	0.166667	0.129032	0.117647	0	0.214286	0.115385	0.0666667	0.0666667	0.444444	0.285714	0	0.0526316	0.263158	0.0909091	0.0625	0	0	0.375	0.0769231	0.047619	0.04	0.0666667	0.173913	0.142857	0.0625	0.0833333	0.1	0.142857
cycloserine	0.157895	0.0952381	0.2	0.0555556	0.125	0	0.269231	0.0714286	0.277778	0.222222	0	0	0.222222	0	0.176471	0.166667	0.166667	0.111111	0.115385	0.0526316	0.166667	0.117647	0.212121	0.2	0.111111	0.375	0.133333	0.105263	0.4	0.0588235	0.0952381	0.117647	0.0416667	0.208333	0	0.157895	0.176471	0.157895	0.0666667	0.1875	0.35	0.192308	0.166667	0.103448	0.105263	0.1	0.285714	0.0666667	0.05
cyproheptadine	0.238095	0.125	0.157895	0.0454545	0.1	0	0.275862	0.117647	0.125	0.130435	0.0526316	0.04	0.04	0.217391	0.142857	0.0869565	0.136364	0.142857	0.178571	0.2	0.136364	0.0952381	0.222222	0.333333	0.2	0.130435	0.357143	0.136364	0.190476	0	0.285714	0.0952381	0.318182	0.1	0.05	0.130435	0.2	0.0833333	0.0526316	0.210526	0.24	0.166667	0.136364	0.16129	0.0869565	0.0833333	0.157895	0.0526316	0.136364
cyproterone	0.190476	0.0833333	0.105263	0.1	0.05	0	0.16129	0.125	0.238095	0.5625	0.0555556	0.0416667	0.190476	0.125	0.210526	0.142857	0.333333	0.0454545	0.185185	0.0454545	0.0909091	0.157895	0.194444	0.285714	0.0454545	0.315789	0.193548	0.263158	0.2	0.166667	0.181818	0.157895	0.166667	0.185185	0.0526316	0.25	0.0952381	0	0	0.047619	0.2	0.259259	0.2	0.25	0	0.0416667	0.105263	0.0555556	0.0909091
cytisine	0.0526316	0	0.230769	0.214286	0.333333	0.2	0.0333333	0.0833333	0.166667	0.25	0.0769231	0.25	0.25	0.1	0.5	0.117647	0.117647	0	0.08	0	0.117647	0.0625	0.117647	0.1	0.0588235	0.176471	0.0322581	0.461538	0.117647	0.0666667	0.05	0.214286	0.0454545	0.08	0.153846	0.25	0.125	0.0526316	0	0.0625	0.25	0.208333	0.117647	0.2	0.1875	0.111111	0.0666667	0.166667	0.0555556
cytochalasin B	0.333333	0.25	0.0526316	0	0.0526316	0.0666667	0.129032	0.0625	0.0869565	0.0909091	0.0588235	0.142857	0.0434783	0.0833333	0.047619	0.15	0.0952381	0.1	0.24	0.157895	0	0	0.135135	0.368421	0.1	0.0909091	0.384615	0	0.15	0.0526316	0.190476	0	0.227273	0.0333333	0.1875	0.0909091	0.157895	0.263158	0	0.05	0.16	0.178571	0.210526	0.0967742	0.0952381	0.0909091	0.176471	0	0
dacarbazine	0	0.0588235	0.0833333	0.272727	0	0	0.166667	0.111111	0.0588235	0.214286	0.1	0	0.133333	0.117647	0.0714286	0.142857	0.0666667	0.0714286	0.2	0.0714286	0.0666667	0.272727	0.166667	0.266667	0	0.0625	0.0740741	0.0666667	0.142857	0.181818	0	0.0769231	0	0.0909091	0.0909091	0.214286	0	0	0	0.0769231	0.1	0.0833333	0.230769	0.285714	0.0666667	0.133333	0.181818	0.1	0.142857
danazol	0.36	0.206897	0.111111	0.107143	0.111111	0.04	0.363636	0.0384615	0.206897	0.0625	0.0769231	0.172414	0.172414	0.2	0.103448	0.137931	0.1	0.230769	0.322581	0.230769	0.222222	0.24	0.529412	0.0909091	0.230769	0.133333	0.352941	0.1	0.137931	0.0344828	0.206897	0.148148	0.423077	0.413793	0.0740741	0.172414	0.142857	0.214286	0.12	0.192308	0.181818	0.264706	0.137931	0.333333	0.1	0.133333	0.153846	0.0769231	0.222222
dantrolene	0.0588235	0.0555556	0.272727	0	0.4	0.111111	0.0357143	0.222222	0.117647	0.125	0.2	0.125	0.125	0.111111	0.333333	0.133333	0.133333	0.142857	0.0869565	0	0.214286	0.153846	0.0909091	0.111111	0.142857	0.125	0.0714286	0.133333	0.307692	0.0769231	0.117647	0.0714286	0.166667	0.0416667	0.0833333	0.125	0.230769	0.125	0.0909091	0.153846	0.0952381	0.0384615	0.416667	0.0769231	0.133333	0.125	0.272727	0.0909091	0.0625
dapsone	0.0666667	0	0.2	0.0833333	0.5	0.333333	0.08	0.125	0.214286	0.142857	0.111111	0.230769	0.142857	0.0588235	0.4	0	0.0714286	0.0769231	0.0454545	0	0.153846	0.0833333	0.0967742	0.0588235	0.0769231	0.230769	0.037037	0.25	0.0714286	0.0909091	0.0625	0.181818	0.0555556	0.0454545	0.1	0.0666667	0.272727	0	0	0.181818	0.166667	0.0869565	0.153846	0.0833333	0.0714286	0	0.0909091	0.111111	0
daunorubicin	0.217391	0.318182	0.142857	0	0.142857	0	0.444444	0	0.208333	0.12	0.047619	0.0769231	0.217391	0.0714286	0.04	0.125	0.08	0.0833333	0.25	0.181818	0.08	0.0869565	0.393939	0.111111	0	0.12	0.333333	0	0.173913	0.0909091	0.16	0.0869565	0.192308	0.25	0.0454545	0.12	0.0833333	0.4	0.047619	0.0416667	0.222222	0.233333	0.173913	0.151515	0.125	0.217391	0.142857	0.047619	0.125
debrisoquine	0.117647	0	0.363636	0.0666667	0.25	0.1	0.0344828	0.0909091	0.176471	0.266667	0	0.1875	0.266667	0.05	0.416667	0.125	0.125	0.0625	0.04	0.133333	0.0588235	0.142857	0.193548	0.105263	0.133333	0.1875	0.107143	0.2	0.125	0.0714286	0.0526316	0.230769	0.222222	0.130435	0.0769231	0.1875	0.214286	0.0555556	0	0.230769	0.263158	0.217391	0.285714	0.16	0.0588235	0.117647	0.153846	0.0833333	0.0588235
decamethonium bromide	0.0869565	0.130435	0.105263	0.1	0.166667	0.133333	0.2	0.2	0.238095	0.0869565	0.1875	0.190476	0.136364	0.173913	0.15	0.2	0.0434783	0.210526	0.333333	0.0454545	0.142857	0.222222	0.264706	0.08	0.15	0.0869565	0.233333	0.142857	0.263158	0.166667	0.238095	0.1	0.166667	0.28	0.333333	0.0869565	0.15	0.136364	0.1875	0.157895	0.153846	0.133333	0.2	0.25	0.2	0.136364	0.235294	0.0555556	0.263158
decitabine	0.0588235	0	0.272727	0.153846	0.4	0.25	0.0357143	0.1	0.1875	0.125	0.2	0.285714	0.2	0.0526316	0.454545	0.0625	0.0625	0.142857	0.0416667	0.0666667	0.133333	0.153846	0.16129	0.111111	0.0666667	0.125	0.0714286	0.214286	0.0625	0.166667	0.117647	0.25	0.105263	0.0869565	0.181818	0.2	0.142857	0.0588235	0.0909091	0.0714286	0.210526	0.173913	0.214286	0.166667	0.214286	0.125	0.0769231	0.2	0
deferoxamine	0.214286	0.296296	0.0714286	0.0689655	0.0714286	0	0.5	0.125	0.296296	0.172414	0.166667	0.0967742	0.214286	0.0909091	0.0666667	0.178571	0.03125	0.185185	0.366667	0.185185	0.137931	0.192308	0.575758	0.285714	0.103448	0.172414	0.352941	0.1	0.222222	0.2	0.296296	0.0689655	0.233333	0.464286	0.115385	0.0967742	0.0322581	0.259259	0.217391	0.148148	0.258065	0.30303	0.1	0.375	0.178571	0.214286	0.153846	0.12	0.178571
dehydrocholic acid	0	0	0.0909091	0.3	0.0909091	0.142857	0.125	0	0.0625	0.0666667	0	0.142857	0.0666667	0.2	0.0769231	0.0714286	0	0.0769231	0.210526	0.0769231	0.153846	0.444444	0.133333	0.0588235	0.0769231	0	0.037037	0.153846	0.0714286	0.0909091	0.0625	0.0833333	0.0555556	0.0952381	0.1	0.142857	0.0769231	0	0	0.0833333	0.05	0.0416667	0.25	0.181818	0.0714286	0.0666667	0.0909091	0	0.25
delsoline	0.230769	0.133333	0.0909091	0	0.2	0.142857	0.125	0.125	0.307692	0.142857	0	0.230769	0.142857	0.0588235	0.166667	0.153846	0	0.166667	0.0952381	0.166667	0.0714286	0.0833333	0.133333	0.0588235	0.0769231	0.230769	0.0769231	0.153846	0	0.2	0.214286	0.0833333	0.1875	0.210526	0.1	0	0.272727	0	0.25	0.181818	0.05	0.0869565	0.153846	0.04	0.0714286	0	0	0.111111	0.0714286
demecarium bromide	0.0555556	0.0526316	0.153846	0.0666667	0.25	0.1	0.153846	0.0909091	0.111111	0	0.181818	0.1875	0.117647	0.166667	0.133333	0.0588235	0.0588235	0.307692	0.04	0.214286	0.384615	0.142857	0.233333	0.05	0.214286	0.117647	0.107143	0.125	0.125	0.0714286	0.111111	0.230769	0.157895	0.181818	0.166667	0.117647	0.307692	0	0.0833333	0.230769	0.142857	0.12	0.2	0.16	0.2	0.1875	0.0714286	0.0833333	0.285714
demeclocycline	0.0526316	0	0.0666667	0.133333	0.0666667	0	0.107143	0.181818	0.166667	0.666667	0.0769231	0.0526316	0.25	0.1	0.2	0.117647	0.357143	0.0588235	0.125	0	0.117647	0.133333	0.1875	0.294118	0.0588235	0.333333	0.0666667	0.266667	0.1875	0.333333	0.05	0.214286	0.0454545	0.227273	0.0714286	0.25	0.0588235	0	0	0.0625	0.25	0.26087	0.1875	0.304348	0.0555556	0.0526316	0.0666667	0.0769231	0.117647
demecolcine	0.0833333	0.125	0.047619	0.277778	0.047619	0.125	0.121212	0.0555556	0.0384615	0.181818	0.0526316	0.181818	0.04	0.272727	0.2	0.136364	0.136364	0.0434783	0.178571	0.142857	0.0416667	0.0454545	0.0731707	0.217391	0.0909091	0.130435	0.151515	0.315789	0.0416667	0	0.08	0.0952381	0.0740741	0.0645161	0.166667	0.130435	0.2	0.04	0	0.0952381	0.107143	0.129032	0.0869565	0.16129	0.190476	0.130435	0.047619	0.176471	0.136364
denatonium benzoate	0.0625	0.0588235	0.0833333	0	0.0833333	0	0.037037	0.111111	0.125	0.214286	0.1	0	0.133333	0	0.0714286	0.230769	0.230769	0.0714286	0.0909091	0	0.142857	0.0769231	0.09375	0.1875	0	0.133333	0.115385	0.142857	0.333333	0.181818	0.0588235	0.0769231	0.111111	0.142857	0.0909091	0.133333	0	0.0625	0	0.0769231	0.157895	0.130435	0.230769	0.173913	0.0666667	0.133333	0.181818	0	0
deptropine	0.28	0.375	0.0769231	0.0357143	0.217391	0	0.482759	0.0416667	0.178571	0.103448	0.04	0.0666667	0.185185	0.133333	0.153846	0.148148	0.0689655	0.2	0.344828	0.111111	0.107143	0.115385	0.428571	0.172414	0.111111	0.103448	0.375	0.0689655	0.291667	0.166667	0.32	0.0740741	0.206897	0.181818	0.0384615	0.103448	0.0714286	0.333333	0.130435	0.0740741	0.233333	0.242424	0.148148	0.235294	0.148148	0.142857	0.217391	0.0833333	0.148148
depudecin	0.0555556	0.111111	0.0714286	0	0.25	0.1	0.111111	0.0909091	0.111111	0.1875	0.0833333	0.1875	0.1875	0.105263	0.133333	0.125	0.2	0.133333	0.181818	0	0.2	0.0666667	0.193548	0.05	0.0625	0.1875	0.0689655	0.125	0.285714	0.0714286	0	0.0666667	0.1	0.181818	0.0769231	0.1875	0.133333	0.1875	0.0833333	0.142857	0.142857	0.0769231	0.125	0.115385	0.0588235	0.0555556	0.153846	0.0833333	0.0588235
dequalinium chloride	0.173913	0.217391	0.15	0.142857	0	0	0.310345	0	0.12	0.125	0.05	0.08	0.08	0.0740741	0.0416667	0.130435	0.0833333	0.136364	0.259259	0.190476	0.130435	0.0909091	0.40625	0.26087	0.0869565	0.0384615	0.444444	0.130435	0.130435	0.0454545	0.12	0.142857	0.2	0.0967742	0.047619	0.173913	0	0.227273	0	0.0909091	0.230769	0.44	0.0833333	0.321429	0.130435	0.227273	0.15	0.05	0.130435
desipramine	0.318182	0.2	0	0.0833333	0.0869565	0.105263	0.212121	0.1	0.153846	0.115385	0.0952381	0.26087	0.0357143	0.192308	0.125	0.0769231	0.12	0.173913	0.241379	0.173913	0.0769231	0.04	0.175	0.347826	0.08	0.16	0.464286	0.272727	0.037037	0.0869565	0.428571	0.0833333	0.333333	0.241379	0.263158	0.0357143	0.227273	0.0740741	0.0952381	0.130435	0.172414	0.1875	0.0769231	0.21875	0.217391	0.0740741	0	0.0952381	0.0769231
desoxycortone	0.173913	0.217391	0.0454545	0.2	0.0952381	0	0.407407	0.0526316	0.217391	0.125	0.105263	0.125	0.35	0.26087	0.0869565	0.3	0.0833333	0.190476	0.416667	0.25	0.181818	0.333333	0.363636	0.208333	0.136364	0.125	0.21875	0.04	0.130435	0.210526	0.217391	0.0434783	0.153846	0.36	0.047619	0.173913	0.0869565	0.125	0.235294	0.0909091	0.28	0.125	0.181818	0.37037	0.368421	0.173913	0.15	0.105263	0.368421
dexamethasone	0.2	0.190476	0.176471	0.05	0.111111	0	0.346154	0.0625	0.190476	0.263158	0	0.0434783	0.142857	0.130435	0.157895	0.15	0.210526	0.1	0.148148	0.047619	0.0454545	0	0.166667	0.0833333	0.157895	0.263158	0.125	0.15	0.277778	0.0526316	0.190476	0.105263	0.0384615	0.192308	0	0.142857	0.157895	0.333333	0.0588235	0.166667	0.208333	0.1	0.15	0.030303	0.0952381	0.0909091	0.25	0.0588235	0.0952381
dexibuprofen	0	0	0.125	0.357143	0.2	0.0769231	0.178571	0.153846	0.0952381	0.157895	0.333333	0.157895	0.294118	0.333333	0.25	0.105263	0.105263	0.176471	0.26087	0.0526316	0.235294	0.357143	0.25	0.2	0.111111	0	0.0967742	0.235294	0.166667	0.2	0.0454545	0.117647	0.0869565	0.26087	0.133333	0.294118	0	0.047619	0.142857	0.117647	0.227273	0.192308	0.166667	0.454545	0.5	0.294118	0.0588235	0.230769	0.4
dexpanthenol	0.133333	0.0588235	0	0	0.181818	0	0.166667	0.666667	0.384615	0.133333	0.571429	0.133333	0.133333	0.0555556	0.153846	0.230769	0.0666667	0.25	0.142857	0.153846	0.230769	0.166667	0.129032	0.1875	0.0714286	0.214286	0.115385	0.142857	0.142857	0.3	0.125	0	0.111111	0.263158	0.0909091	0.0625	0.0714286	0	0.375	0.166667	0.157895	0.130435	0.0666667	0.227273	0.333333	0.133333	0.0833333	0.222222	0.142857
dexpropranolol	0.05	0.1	0.0625	0.2	0.0625	0	0.185185	0.272727	0.1	0.235294	0.153846	0	0.105263	0.277778	0.1875	0.111111	0.176471	0.1875	0.217391	0.1875	0.176471	0.2	0.21875	0.352941	0.117647	0.105263	0.137931	0.176471	0.111111	0.133333	0.047619	0.125	0.142857	0.12	0.0666667	0.166667	0.117647	0.05	0.0714286	0.125	0.130435	0.153846	0.176471	0.291667	0.176471	0.235294	0.133333	0.153846	0.25
dextromethorphan	0.166667	0.222222	0.133333	0.0588235	0.0625	0	0.28	0.0769231	0.157895	0.166667	0.0714286	0	0.05	0.0454545	0.0555556	0.111111	0.111111	0.1875	0.272727	0.117647	0.111111	0.125	0.21875	0.210526	0.0555556	0.166667	0.269231	0	0.25	0.133333	0.222222	0.0588235	0.142857	0.037037	0.0666667	0.105263	0.117647	0.166667	0	0.0588235	0.181818	0.25	0.25	0.148148	0	0.105263	0.307692	0	0.0526316
dexverapamil	0.205882	0.272727	0.121212	0.0857143	0.121212	0	0.575758	0.0967742	0.3125	0.242424	0.129032	0.108108	0.28125	0.131579	0.0833333	0.212121	0.212121	0.3	0.333333	0.181818	0.290323	0.1875	0.84375	0.264706	0.114286	0.242424	0.472222	0.111111	0.25	0.233333	0.2	0.1875	0.257143	0.411765	0.0909091	0.205882	0.0540541	0.242424	0.166667	0.151515	0.314286	0.470588	0.176471	0.5	0.176471	0.171429	0.193548	0.09375	0.212121
diazoxide	0	0.0526316	0	0.142857	0.153846	0.222222	0.0344828	0.0909091	0.111111	0.1875	0.181818	0.357143	0.0555556	0.166667	0.133333	0.0588235	0.2	0.133333	0.130435	0	0.125	0.0666667	0.0882353	0.105263	0	0.117647	0.148148	0.285714	0	0.153846	0.111111	0.142857	0.047619	0.130435	0.272727	0.117647	0.0625	0.0555556	0.0833333	0.0666667	0.0909091	0.12	0.0588235	0.208333	0.2	0.0555556	0	0.0833333	0.0588235
diclofenac	0.111111	0.148148	0.238095	0.08	0.130435	0.047619	0.413793	0.0952381	0.291667	0.2	0.142857	0.0714286	0.304348	0.142857	0.12	0.115385	0.115385	0.217391	0.275862	0.0769231	0.318182	0.35	0.6	0.142857	0.166667	0.111111	0.235294	0.16	0.26087	0.130435	0.148148	0.173913	0.222222	0.423077	0	0.153846	0.0769231	0.2	0.2	0.227273	0.25	0.3	0.16	0.333333	0.115385	0.2	0.181818	0.0909091	0.208333
diclofenamide	0.111111	0.05	0.0666667	0.133333	0.142857	0.333333	0.0333333	0.0833333	0.105263	0.25	0.0769231	0.428571	0.0526316	0.222222	0.2	0.0555556	0.117647	0.0588235	0.173913	0.0588235	0.0555556	0.133333	0.0857143	0.1	0.0588235	0.176471	0.142857	0.357143	0	0	0.105263	0.0625	0.15	0.173913	0.363636	0.0526316	0.285714	0.0526316	0	0.133333	0.0416667	0.0740741	0.266667	0.111111	0.117647	0	0	0.0769231	0.117647
dicloxacillin	0.130435	0.08	0.294118	0.15	0.222222	0.0588235	0.193548	0.0555556	0.125	0.130435	0.0526316	0.181818	0.181818	0.12	0.2	0.0416667	0.136364	0.263158	0.178571	0.0909091	0.190476	0.15	0.466667	0.037037	0.2	0.181818	0.310345	0.25	0.190476	0.047619	0.125	0.352941	0.26087	0.222222	0.166667	0.181818	0.142857	0.130435	0.0526316	0.352941	0.24	0.296296	0.136364	0.333333	0.0869565	0.181818	0.157895	0.111111	0.190476
dicoumarol	0.176471	0.105263	0.142857	0	0.0666667	0.0909091	0.107143	0.181818	0.105263	0.176471	0.0769231	0.111111	0.111111	0.047619	0.0588235	0.1875	0.1875	0.2	0.173913	0.125	0.117647	0.0625	0.1875	0.1	0.0588235	0.25	0.28	0.117647	0.1875	0.0666667	0	0.0625	0.277778	0.227273	0.25	0	0.285714	0.0526316	0	0.416667	0.136364	0.16	0.266667	0.153846	0	0.0526316	0.230769	0	0.0555556
dicycloverine	0.227273	0.12	0.0952381	0.2	0.0952381	0.0555556	0.151515	0.0526316	0.037037	0	0.166667	0.285714	0.08	0.26087	0.136364	0.0833333	0.04	0.190476	0.259259	0.190476	0.130435	0.0909091	0.25	0.115385	0.25	0.0384615	0.344828	0.181818	0.130435	0	0.166667	0.0909091	0.304348	0.259259	0.222222	0.125	0.136364	0.08	0.05	0.263158	0.230769	0.2	0.0833333	0.423077	0.238095	0.227273	0.0952381	0.105263	0.238095
dienestrol	0.125	0.12	0.0952381	0.2	0.0454545	0.0555556	0.117647	0.0526316	0.0769231	0.35	0.105263	0.125	0.173913	0.26087	0.136364	0.130435	0.181818	0.0416667	0.259259	0.0416667	0.0833333	0.0909091	0.184211	0.318182	0.136364	0.125	0.181818	0.181818	0.130435	0.210526	0.166667	0.0909091	0.2	0.214286	0.1	0.173913	0.0869565	0.0384615	0.05	0	0.185185	0.2	0.181818	0.321429	0.130435	0.08	0.0454545	0.105263	0.130435
diethylcarbamazine	0	0	0.181818	0.272727	0.181818	0.125	0.037037	0.111111	0.2	0.214286	0.1	0.133333	0.133333	0.0555556	0.363636	0.230769	0.230769	0.0714286	0.0909091	0.153846	0.142857	0.166667	0.129032	0.117647	0.153846	0.214286	0.0357143	0.142857	0.0666667	0.181818	0.0588235	0.4	0.0526316	0	0.0909091	0.214286	0.153846	0	0	0.0769231	0.157895	0.0833333	0.230769	0.173913	0.0666667	0.133333	0.181818	0.222222	0.142857
diethylstilbestrol	0.178571	0.214286	0.115385	0.2	0.0740741	0.136364	0.128205	0.04	0.0625	0.1	0.08	0.269231	0.03125	0.25	0.192308	0.0666667	0.142857	0.0689655	0.176471	0.107143	0.103448	0.0714286	0.159091	0.206897	0.192308	0.0645161	0.285714	0.28	0.0322581	0.0357143	0.214286	0.153846	0.241379	0.142857	0.12	0.1	0.24	0.137931	0.0384615	0.0714286	0.151515	0.2	0.103448	0.194444	0.185185	0.178571	0	0.125	0.0666667
difenidol	0.05	0.1	0.0625	0.2	0.307692	0.181818	0.0666667	0.0769231	0.157895	0.235294	0.153846	0.3125	0.235294	0.15	0.1875	0.428571	0.176471	0.117647	0.272727	0.117647	0.111111	0.0588235	0.114286	0.0454545	0	0.3125	0.137931	0.25	0.176471	0.214286	0.1	0.0588235	0.0434783	0.12	0.333333	0.235294	0.0555556	0.05	0.0714286	0	0.130435	0.0714286	0.176471	0.291667	0.25	0.05	0.214286	0.153846	0.111111
diflorasone	0.125	0.166667	0.0952381	0.142857	0.15	0.117647	0.266667	0.0526316	0.166667	0.08	0.166667	0.285714	0.285714	0.115385	0.0869565	0.181818	0.130435	0.25	0.214286	0.136364	0.3	0.142857	0.40625	0.115385	0.0869565	0.227273	0.3	0.181818	0.181818	0.0952381	0.0769231	0.0909091	0.153846	0.307692	0.222222	0.173913	0.136364	0.08	0.105263	0.263158	0.28	0.285714	0.0833333	0.423077	0.238095	0.125	0.15	0.05	0.130435
diflunisal	0.0555556	0.111111	0	0.333333	0.25	0.222222	0.111111	0.2	0.111111	0	0.3	0.357143	0.0555556	0.3125	0.133333	0.125	0.0588235	0.307692	0.238095	0.0625	0.2	0.142857	0.121212	0.105263	0.214286	0.0555556	0.148148	0.2	0.0588235	0.25	0.111111	0.0666667	0.1	0.181818	0.272727	0.117647	0.0625	0	0.3	0.0666667	0.0909091	0.0769231	0	0.318182	0.5	0.0555556	0	0.3	0.2
digitoxigenin	0.190476	0.181818	0.166667	0.047619	0.05	0	0.2	0	0.0833333	0.0869565	0	0.0869565	0.0869565	0.125	0.0454545	0.0434783	0.0434783	0.0454545	0.142857	0.210526	0	0.047619	0.228571	0.125	0.0454545	0.136364	0.37037	0.0434783	0.0434783	0	0.238095	0.1	0.166667	0.142857	0.111111	0.136364	0.15	0.315789	0	0.1	0.153846	0.214286	0.142857	0.0606061	0.0434783	0.315789	0.05	0	0.0909091
digoxigenin	0.181818	0.125	0.222222	0.0454545	0.222222	0.0588235	0.193548	0.0555556	0.08	0.0833333	0.111111	0.130435	0.0833333	0.12	0.142857	0.0416667	0.0416667	0.142857	0.178571	0.142857	0.0869565	0.0454545	0.257143	0.12	0.0909091	0.181818	0.407407	0.136364	0.136364	0	0.227273	0.0952381	0.208333	0.137931	0.166667	0.0833333	0.142857	0.3	0.0526316	0.15	0.192308	0.206897	0.190476	0.0909091	0.136364	0.238095	0.1	0.111111	0.0869565
digoxin	0.173913	0.166667	0.210526	0.0434783	0.0952381	0.0555556	0.266667	0.0526316	0.272727	0.227273	0	0.125	0.125	0.115385	0.136364	0.0833333	0.0833333	0	0.172414	0.136364	0.04	0.0909091	0.323529	0.16	0.136364	0.173913	0.344828	0.130435	0.04	0.0952381	0.333333	0.2	0.2	0.172414	0.047619	0.125	0.136364	0.227273	0.05	0.142857	0.230769	0.285714	0.0833333	0.121212	0	0.173913	0.0454545	0	0.130435
dihydroergocristine	0.153846	0.148148	0.181818	0.0384615	0.181818	0.047619	0.28125	0.0952381	0.192308	0.111111	0.0909091	0.111111	0.111111	0.230769	0.166667	0.0740741	0.208333	0.272727	0.15625	0.217391	0.26087	0.125	0.454545	0.142857	0.272727	0.153846	0.354839	0.16	0.16	0.181818	0.347826	0.285714	0.375	0.233333	0.0869565	0.111111	0.272727	0.111111	0.142857	0.227273	0.25	0.344828	0.115385	0.212121	0.115385	0.153846	0.0833333	0.0434783	0.16
dihydroergotamine	0.148148	0.230769	0.08	0.037037	0.125	0	0.5	0.2	0.333333	0.148148	0.190476	0.0333333	0.192308	0.222222	0.115385	0.2	0.0714286	0.16	0.310345	0.208333	0.25	0.217391	0.361111	0.375	0.115385	0.148148	0.30303	0.111111	0.304348	0.173913	0.230769	0	0.133333	0.266667	0.04	0.107143	0.16	0.192308	0.190476	0.12	0.285714	0.212121	0.2	0.205882	0.2	0.24	0.227273	0.0416667	0.153846
dihydrostreptomycin	0	0	0.2	0.117647	0.2	0	0.137931	0.25	0.15	0.1	0.333333	0.1	0.222222	0.0909091	0.176471	0.4	0.166667	0.176471	0.115385	0.176471	0.3125	0.117647	0.212121	0.0909091	0.176471	0.222222	0.214286	0.166667	0.4	0.125	0.0952381	0.117647	0.0869565	0.208333	0.214286	0.157895	0.111111	0.047619	0.142857	0.266667	0.421053	0.148148	0.166667	0.333333	0.4	0.222222	0.285714	0.142857	0.3125
dilazep	0.136364	0.181818	0.105263	0	0.105263	0	0.2	0.0588235	0.130435	0.315789	0	0.136364	0.136364	0.125	0.15	0.0909091	0.2	0	0.142857	0.0952381	0.0434783	0.047619	0.162162	0.227273	0.0454545	0.190476	0.15625	0.2	0.2	0.105263	0.181818	0.047619	0.12	0.185185	0	0.190476	0.0952381	0.315789	0	0.047619	0.25	0.214286	0.2	0.09375	0.0434783	0.25	0.05	0	0
diloxanide	0.238095	0.227273	0.1	0	0.157895	0.125	0.121212	0.0555556	0.35	0.238095	0	0.368421	0.130435	0.0769231	0.2	0.136364	0.0869565	0.0909091	0.137931	0.0909091	0.0416667	0.0454545	0.157895	0.12	0.0434783	0.238095	0.151515	0.136364	0.0416667	0.157895	0.285714	0.0952381	0.26087	0.222222	0.105263	0.0833333	0.263158	0.130435	0.111111	0.0952381	0.0689655	0.206897	0.190476	0.0588235	0.0416667	0.04	0.047619	0.0526316	0.0416667
diltiazem	0.157895	0.0952381	0.0588235	0.1875	0.125	0	0.32	0.0714286	0.210526	0.1	0.142857	0.1	0.157895	0.263158	0.0526316	0.166667	0.105263	0.25	0.26087	0.25	0.235294	0.266667	0.290323	0.2	0.176471	0.1	0.172414	0.05	0.105263	0.2	0.210526	0.1875	0.190476	0.26087	0.0625	0.294118	0.0526316	0	0.142857	0.117647	0.173913	0.148148	0.105263	0.333333	0.235294	0.157895	0.0588235	0.142857	0.4
dimenhydrinate	0	0	0.2	0.181818	0.333333	0.333333	0.0384615	0.125	0.133333	0	0.25	0.142857	0.0666667	0.0588235	0.4	0.153846	0.0714286	0.0769231	0.0454545	0.0769231	0.153846	0.181818	0.0625	0.0588235	0.166667	0.0666667	0.037037	0.153846	0.0714286	0.0909091	0.133333	0.181818	0.0555556	0.0454545	0.1	0.0666667	0.166667	0.0666667	0.111111	0.0833333	0.166667	0.0416667	0.153846	0.0833333	0.363636	0.142857	0.0909091	0.25	0.0714286
dimethadione	0	0.0555556	0	0.25	0	0	0.16	0.1	0.117647	0.285714	0.0909091	0.125	0.0588235	0.333333	0	0.214286	0.214286	0.142857	0.190476	0.0666667	0.133333	0.153846	0.125	0.25	0.142857	0.0588235	0.0344828	0	0.133333	0.4	0.0555556	0.0714286	0	0.136364	0.0833333	0.285714	0	0.0588235	0.0909091	0	0.0952381	0.08	0.307692	0.217391	0.0625	0	0.166667	0	0.214286
dimethyloxalylglycine	0.115385	0.25	0.0869565	0.0833333	0.190476	0.105263	0.290323	0	0.153846	0.0740741	0.0952381	0.45	0.16	0.148148	0.08	0.12	0.0769231	0.125	0.241379	0.227273	0.0769231	0	0.342857	0.107143	0	0.16	0.413793	0.0769231	0.0769231	0.0869565	0.111111	0.0833333	0.103448	0.16129	0.263158	0.115385	0.173913	0.318182	0.0454545	0.0833333	0.172414	0.225806	0.166667	0.21875	0.217391	0.208333	0.0869565	0.0952381	0.12
dinoprost	0.125	0.037037	0.0454545	0.263158	0.0952381	0.0555556	0.225806	0.0526316	0.217391	0.125	0.166667	0.227273	0.227273	0.208333	0.190476	0.130435	0.3	0.190476	0.133333	0.190476	0.3	0.142857	0.323529	0.16	0.136364	0.285714	0.21875	0.181818	0.04	0.15	0.166667	0.333333	0.153846	0.307692	0.222222	0.285714	0.190476	0	0.105263	0.2	0.28	0.333333	0.04	0.37037	0.3	0.173913	0	0.105263	0.3
dinoprostone	0.157895	0.0952381	0.2	0.117647	0.2	0.0769231	0.222222	0.0714286	0.0952381	0	0.0666667	0.047619	0.1	0.2	0.176471	0.105263	0	0.176471	0.26087	0.176471	0.235294	0.266667	0.290323	0.0434783	0.25	0.047619	0.133333	0.105263	0.235294	0	0.210526	0.117647	0.315789	0.208333	0.0625	0.1	0.25	0.1	0.0666667	0.266667	0.173913	0.0689655	0.166667	0.185185	0.05	0.1	0.285714	0.0666667	0.235294
dioxybenzone	0.0909091	0.0869565	0.25	0.3125	0.111111	0	0.206897	0	0.136364	0.2	0	0.142857	0.333333	0.181818	0.157895	0.0952381	0.210526	0.1	0.192308	0.1	0.0952381	0.166667	0.3125	0.0833333	0.222222	0.263158	0.2	0.0952381	0.15	0.0526316	0.0416667	0.235294	0.125	0.192308	0.0555556	0.263158	0.1	0.0909091	0.0588235	0.235294	0.318182	0.178571	0.0952381	0.307692	0.0952381	0.142857	0.176471	0.125	0.210526
diperodon	0.105263	0.047619	0	0.125	0.0625	0.181818	0.103448	0.0769231	0.047619	0.05	0.153846	0.235294	0	0.210526	0.0555556	0.0526316	0.111111	0.1875	0.217391	0.1875	0.111111	0.0588235	0.114286	0.15	0.117647	0.105263	0.32	0.333333	0.0526316	0.0625	0.294118	0.0588235	0.2	0.166667	0.333333	0	0.1875	0.05	0.0714286	0.125	0.130435	0.153846	0.0526316	0.148148	0.176471	0.105263	0	0.0714286	0.0526316
diphemanil metilsulfate	0.142857	0.0869565	0.0526316	0.166667	0.111111	0.142857	0.0606061	0.214286	0.136364	0.0909091	0.285714	0.263158	0.0434783	0.130435	0.294118	0.277778	0.15	0.157895	0.192308	0.222222	0.15	0.05	0.135135	0.0833333	0.157895	0.2	0.2	0.277778	0.15	0.0526316	0.0416667	0.105263	0.285714	0.192308	0.357143	0.0434783	0.294118	0	0.0588235	0.4	0.16	0.269231	0.0952381	0.259259	0.277778	0.2	0.111111	0.2	0.210526
diphenhydramine	0.111111	0.05	0.230769	0.214286	0.230769	0.2	0.0689655	0.0833333	0.105263	0.0526316	0.0769231	0.25	0.0526316	0.1	0.5	0.117647	0.0555556	0	0.08	0.125	0.0555556	0.0625	0.0555556	0.1	0.2	0.111111	0.0666667	0.1875	0.0555556	0	0.166667	0.133333	0.15	0.08	0.0714286	0.111111	0.285714	0.176471	0	0.133333	0.25	0.115385	0.1875	0.0714286	0.1875	0.25	0.0666667	0.166667	0.0555556
diphenylpyraline	0.190476	0.181818	0	0.047619	0.105263	0.0625	0.125	0.0588235	0.181818	0.190476	0.0555556	0.25	0.136364	0.125	0.0952381	0.2	0.263158	0.0454545	0.185185	0.0952381	0.0434783	0	0.131579	0.227273	0.0952381	0.190476	0.275862	0.0909091	0.142857	0.166667	0.3	0.1	0.217391	0.142857	0.176471	0.190476	0.0952381	0.0869565	0.0555556	0	0.2	0.172414	0.0909091	0.206897	0.0434783	0.0416667	0.05	0.0555556	0.0434783
dipivefrine	0.103448	0.1	0.166667	0.208333	0.0769231	0	0.30303	0.0869565	0.178571	0.333333	0.0833333	0.103448	0.230769	0.259259	0.2	0.24	0.347826	0.111111	0.21875	0.304348	0.192308	0.115385	0.351351	0.259259	0.25	0.28	0.257143	0.148148	0.24	0.166667	0.137931	0.208333	0.166667	0.181818	0.0384615	0.333333	0.25	0.0666667	0	0.16	0.48	0.413793	0.192308	0.354839	0.107143	0.230769	0.166667	0.0833333	0.192308
diprophylline	0.125	0.117647	0.0769231	0	0.0769231	0.25	0.0740741	0	0.0555556	0.125	0	0.285714	0	0.0526316	0.0666667	0.0625	0.0625	0.142857	0.0869565	0.0666667	0.0625	0.0714286	0.125	0.0526316	0.142857	0.125	0.153846	0.133333	0.0625	0	0.266667	0.153846	0.105263	0.136364	0.3	0.0588235	0.230769	0.125	0	0.0714286	0.0952381	0.08	0.214286	0.0769231	0	0	0.0769231	0	0.0625
dipyridamole	0.185185	0.222222	0.217391	0.0357143	0.166667	0.0434783	0.387097	0.0416667	0.269231	0.230769	0.04	0.0666667	0.28	0.172414	0.111111	0.148148	0.148148	0.0344828	0.392857	0.153846	0.107143	0.208333	0.428571	0.214286	0.111111	0.185185	0.294118	0.0333333	0.24	0.166667	0.137931	0.115385	0.25	0.21875	0.0384615	0.142857	0.153846	0.28	0.0833333	0.115385	0.233333	0.205882	0.24	0.166667	0.0333333	0.185185	0.217391	0	0.107143
dirithromycin	0.172414	0.166667	0.2	0.148148	0.153846	0.04	0.5	0.08	0.346154	0.172414	0.0769231	0.133333	0.259259	0.125	0.103448	0.178571	0.178571	0.333333	0.28125	0.185185	0.269231	0.192308	0.733333	0.2	0.142857	0.259259	0.393939	0.1	0.178571	0.25	0.25	0.291667	0.233333	0.322581	0.115385	0.214286	0.103448	0.214286	0.166667	0.192308	0.258065	0.387097	0.178571	0.375	0.1	0.133333	0.25	0.0769231	0.178571
disopyramide	0	0	0.2	0.181818	0.333333	0	0.08	0	0.0625	0.0666667	0	0.142857	0.230769	0.125	0.166667	0.153846	0.0714286	0.166667	0.0952381	0.0769231	0.153846	0.0833333	0.0967742	0	0	0.142857	0.0769231	0.0714286	0.153846	0.0909091	0	0.0833333	0	0	0.1	0.230769	0.0769231	0.0666667	0	0.0833333	0.166667	0.0416667	0.25	0.130435	0.153846	0.0666667	0.333333	0	0.153846
disulfiram	0.173913	0.217391	0.0952381	0.2	0.0952381	0.0555556	0.117647	0.0526316	0.037037	0.0384615	0.105263	0.0384615	0.0384615	0.16	0.25	0.0833333	0.130435	0.136364	0.133333	0.190476	0.130435	0.0434783	0.216216	0.26087	0.190476	0.0384615	0.21875	0.181818	0.0833333	0.0454545	0.12	0.2	0.363636	0.0625	0.047619	0.08	0.136364	0.08	0.05	0.2	0.142857	0.333333	0	0.233333	0.238095	0.285714	0.0454545	0.235294	0.130435
dizocilpine	0.0555556	0.111111	0.25	0.230769	0	0	0.25	0.0909091	0.176471	0.266667	0	0	0.1875	0.166667	0.133333	0.2	0.0588235	0.0625	0.130435	0.133333	0.0588235	0.142857	0.233333	0.166667	0.0625	0.117647	0.107143	0.125	0.0588235	0.0714286	0.0526316	0.142857	0.047619	0.130435	0	0.266667	0.0625	0	0.0833333	0.230769	0.142857	0.166667	0.0588235	0.208333	0.0588235	0.117647	0.153846	0.0833333	0.2
dl-alpha tocopherol	0	0.0454545	0.285714	0.266667	0.125	0	0.178571	0.153846	0.0952381	0.157895	0.142857	0.047619	0.157895	0.263158	0.111111	0.166667	0.105263	0.176471	0.16	0.176471	0.166667	0.1875	0.25	0.0909091	0.176471	0.157895	0.172414	0.105263	0.235294	0.0588235	0.0454545	0.1875	0.0869565	0.16	0.133333	0.294118	0.111111	0	0.0666667	0.266667	0.227273	0.107143	0.166667	0.333333	0.05	0.222222	0.285714	0.142857	0.235294
DL-PPMP	0.15	0.0909091	0.117647	0.176471	0.117647	0.153846	0.133333	0.0666667	0.0909091	0.0952381	0.0625	0.277778	0.15	0.315789	0.166667	0.157895	0.047619	0.05	0.25	0.105263	0	0.0526316	0.0789474	0.0869565	0.105263	0.0952381	0.206897	0.222222	0.1	0.0555556	0.142857	0	0.0833333	0.153846	0.285714	0.0952381	0.235294	0.0952381	0.0625	0.176471	0.12	0.103448	0.157895	0.1	0.157895	0.15	0.0555556	0.0625	0.157895
DL-thiorphan	0.0588235	0	0.0769231	0.153846	0	0	0.208333	0.375	0.266667	0.2	0.2	0.0588235	0	0.111111	0.0666667	0.0625	0.214286	0.142857	0.0869565	0	0.133333	0.0714286	0.125	0.25	0.0666667	0.2	0.2	0.133333	0.0625	0.272727	0.117647	0.25	0	0.136364	0.3	0.125	0.0666667	0	0.0909091	0.0714286	0.15	0.173913	0.0625	0.217391	0.214286	0	0.0769231	0	0.214286
dobutamine	0.0909091	0.0416667	0.25	0.235294	0.111111	0	0.166667	0	0.0869565	0.263158	0	0.142857	0.2	0.3	0.157895	0.0952381	0.277778	0.157895	0.148148	0.222222	0.15	0.105263	0.272727	0.238095	0.222222	0.142857	0.2	0.0454545	0.0952381	0.111111	0.136364	0.235294	0.227273	0.0689655	0	0.411765	0.157895	0.0909091	0	0.105263	0.318182	0.269231	0.210526	0.259259	0.0454545	0.0909091	0.176471	0.0588235	0.15
docosahexaenoic acid ethyl ester	0.263158	0.190476	0	0.05	0.176471	0.142857	0.129032	0.133333	0.190476	0.142857	0.125	0.263158	0.142857	0.0833333	0.157895	0.15	0.0952381	0.157895	0.148148	0.157895	0.0952381	0.05	0.135135	0.130435	0	0.263158	0.16129	0.15	0.0454545	0.176471	0.0869565	0.05	0.173913	0.192308	0.1875	0.0909091	0.222222	0.0434783	0.125	0.105263	0.16	0.269231	0.0454545	0.172414	0.15	0.0434783	0	0.125	0
domperidone	0.142857	0.0869565	0.111111	0.235294	0.111111	0.0666667	0.129032	0.0625	0.136364	0.333333	0.0588235	0.2	0.2	0.238095	0.294118	0.0454545	0.277778	0	0.148148	0	0.0454545	0.05	0.166667	0.181818	0.1	0.2	0.2	0.352941	0.0952381	0.0526316	0.0869565	0.166667	0.125	0.148148	0.117647	0.263158	0.1	0	0	0.05	0.208333	0.222222	0.0454545	0.307692	0.15	0.0434783	0	0.125	0.0952381
dopamine	0.25	0.192308	0.04	0.125	0.0833333	0.047619	0.28125	0.210526	0.24	0.363636	0.142857	0.2	0.304348	0.28	0.12	0.208333	0.16	0.217391	0.48	0.12	0.16	0.285714	0.371429	0.333333	0.12	0.25	0.272727	0.208333	0.208333	0.238095	0.192308	0.0384615	0.222222	0.48	0.190476	0.153846	0.166667	0.111111	0.263158	0.173913	0.25	0.21875	0.208333	0.37931	0.16	0.111111	0.0833333	0.142857	0.208333
dorzolamide	0.111111	0.05	0.0666667	0.133333	0.142857	0.0909091	0.107143	0.181818	0.3125	0.333333	0.0769231	0.176471	0.176471	0.1	0.285714	0.1875	0.1875	0.0588235	0.125	0.125	0.0555556	0.133333	0.151515	0.1	0.125	0.428571	0.0666667	0.1875	0.0555556	0.230769	0.166667	0.214286	0.0952381	0.227273	0.153846	0.111111	0.285714	0	0.0769231	0.307692	0.136364	0.115385	0.1875	0.111111	0.0555556	0.111111	0.0666667	0.0769231	0.1875
dosulepin	0.181818	0.08	0.047619	0.0952381	0.1	0.125	0.121212	0.0555556	0.0384615	0.181818	0.0526316	0.181818	0.0833333	0.272727	0.2	0.0869565	0.136364	0	0.269231	0.0909091	0	0.0454545	0.0731707	0.217391	0.0909091	0.0833333	0.266667	0.25	0.0869565	0	0.285714	0.0454545	0.208333	0.137931	0.235294	0.0833333	0.2	0.130435	0	0.0454545	0.192308	0.129032	0.136364	0.125	0.136364	0.0833333	0.047619	0.0526316	0.136364
doxazosin	0.0869565	0.181818	0	0.1	0.105263	0	0.384615	0.125	0.444444	0.25	0.1875	0.136364	0.315789	0.125	0.0952381	0.333333	0.2	0.210526	0.230769	0.15	0.333333	0.222222	0.387097	0.285714	0.0454545	0.25	0.121212	0.0434783	0.2	0.5	0.181818	0.1	0.0769231	0.333333	0.0526316	0.25	0.0454545	0.0416667	0.266667	0	0.2	0.259259	0.142857	0.4	0.263158	0.0416667	0.166667	0.0555556	0.2
doxepin	0.0952381	0.142857	0.0555556	0.111111	0.117647	0	0.214286	0.230769	0.2	0.0952381	0.307692	0.0952381	0.15	0.0416667	0.235294	0.222222	0.157895	0.235294	0.153846	0.235294	0.222222	0.111111	0.28125	0.25	0.105263	0.15	0.25	0.157895	0.1	0.1875	0.263158	0.25	0.238095	0.25	0.125	0.0952381	0.105263	0.0454545	0.214286	0.176471	0.272727	0.230769	0.047619	0.375	0.375	0.352941	0.0555556	0.307692	0.222222
doxorubicin	0.210526	0.263158	0.0555556	0	0.0555556	0.0714286	0.259259	0.0666667	0.0909091	0.15	0	0.0952381	0.0454545	0.0416667	0.105263	0.1	0.047619	0.05	0.25	0.05	0	0	0.171429	0.136364	0.05	0.0952381	0.166667	0.1	0.157895	0	0.142857	0	0.0833333	0.153846	0.0588235	0.0952381	0.105263	0.642857	0	0.0526316	0.166667	0.185185	0.1	0.03125	0.047619	0.15	0.1875	0	0
doxycycline	0	0.111111	0	0.230769	0.0714286	0.222222	0	0	0	0.1875	0.0833333	0.357143	0.0555556	0.4	0.0625	0.0588235	0.125	0	0.181818	0.0625	0	0.0666667	0.0277778	0.05	0.0625	0.0555556	0.107143	0.2	0	0	0.0526316	0	0.047619	0.130435	0.272727	0.117647	0.133333	0.0555556	0	0	0.0434783	0	0.125	0.16	0.125	0.0555556	0	0.0833333	0.125
doxylamine	0.0416667	0.130435	0.05	0.466667	0.166667	0.0625	0.285714	0.125	0.181818	0.0869565	0.266667	0.190476	0.25	0.35	0.210526	0.263158	0.142857	0.352941	0.28	0.210526	0.333333	0.222222	0.34375	0.173913	0.15	0.0869565	0.15625	0.263158	0.0434783	0.235294	0.130435	0.222222	0.12	0.28	0.111111	0.25	0.0454545	0	0.266667	0.222222	0.153846	0.172414	0.0434783	0.521739	0.6	0.315789	0.05	0.357143	0.5
drofenine	0.08	0.166667	0.0952381	0.263158	0	0	0.266667	0.0526316	0.166667	0.285714	0.105263	0.08	0.173913	0.16	0.0869565	0.368421	0.181818	0.136364	0.172414	0.190476	0.181818	0.0909091	0.323529	0.26087	0.25	0.173913	0.181818	0.130435	0.238095	0.210526	0.217391	0.2	0.0714286	0.259259	0.1	0.285714	0.0416667	0.0384615	0.05	0.0909091	0.391304	0.241379	0.130435	0.48	0.181818	0.125	0.210526	0.105263	0.3
droperidol	0.263158	0.25	0	0	0.0526316	0.0666667	0.346154	0.133333	0.388889	0.0909091	0.0588235	0.142857	0.142857	0.0833333	0.047619	0.15	0.0952381	0.222222	0.148148	0.1	0.15	0.105263	0.272727	0.181818	0.047619	0.2	0.333333	0.15	0.0952381	0.176471	0.315789	0.105263	0.173913	0.409091	0.1875	0	0.157895	0.0909091	0.285714	0.166667	0.115385	0.178571	0.0454545	0.133333	0.0952381	0.0434783	0.0526316	0.0588235	0.0952381
dropropizine	0	0.0714286	0	0	0	0	0.0416667	0	0.0714286	0.166667	0	0	0.0769231	0.0666667	0	0.0833333	0.0833333	0.0909091	0.05	0	0.0833333	0	0.0666667	0	0	0.0769231	0.04	0.181818	0	0.111111	0.153846	0.1	0.0625	0.166667	0	0	0	0	0.142857	0.1	0	0.0454545	0	0.0434783	0	0.0769231	0	0	0.0833333
dyclonine	0.157895	0.0454545	0	0.117647	0.125	0.166667	0.1	0.0714286	0.15	0.1	0.142857	0.375	0.1	0.142857	0.176471	0.105263	0.105263	0.0526316	0.16	0.111111	0.05	0	0.0810811	0.0909091	0.0526316	0.157895	0.172414	0.235294	0.05	0.0588235	0.0454545	0.0555556	0.136364	0.115385	0.307692	0.1	0.176471	0	0	0.117647	0.125	0.24	0.05	0.142857	0.166667	0.047619	0	0.0666667	0.105263
dydrogesterone	0.25	0.3	0.105263	0.157895	0.235294	0.214286	0.0909091	0	0.181818	0.0869565	0.0555556	0.25	0.190476	0.173913	0.277778	0.333333	0.0909091	0.0454545	0.28	0.15	0.0909091	0.047619	0.131579	0.08	0.15	0.136364	0.15625	0.2	0.0909091	0.105263	0.3	0.1	0.272727	0.142857	0.176471	0.0869565	0.277778	0.0869565	0.117647	0.047619	0.153846	0.0967742	0.0909091	0.129032	0.263158	0.0869565	0.05	0.1875	0.142857
ebselen	0.2	0.24	0.04	0.08	0.04	0	0.464286	0	0.24	0.0714286	0.0434783	0.0714286	0.153846	0.185185	0	0.208333	0.0740741	0.12	0.275862	0.217391	0.16	0.125	0.371429	0.28	0.166667	0.0714286	0.3125	0.0357143	0.16	0.181818	0.24	0.08	0.222222	0.233333	0.0416667	0.111111	0.037037	0.111111	0.142857	0.0384615	0.166667	0.258065	0.0740741	0.25	0.16	0.0714286	0.130435	0.0434783	0.208333
econazole	0.388889	0.3	0.166667	0	0.05	0.0625	0.2	0	0.0833333	0.0869565	0	0.0869565	0.0416667	0.125	0.0952381	0.0434783	0.0909091	0.0454545	0.185185	0.0952381	0.0434783	0.157895	0.194444	0.227273	0.277778	0	0.37037	0.0909091	0.2	0.05	0.3	0.047619	0.333333	0.0666667	0	0	0.15	0.190476	0	0.047619	0.153846	0.172414	0.2	0.166667	0.0434783	0.0416667	0.105263	0	0.0434783
edrophonium chloride	0.0555556	0.176471	0.0714286	0.0666667	0.153846	0.1	0.153846	0	0.25	0.1875	0.0833333	0.266667	0.266667	0.235294	0.0625	0.2	0.0588235	0.0625	0.130435	0.214286	0.125	0.142857	0.15625	0.05	0.0625	0.117647	0.0333333	0.125	0	0.153846	0.25	0.0666667	0.1	0.238095	0	0.1875	0.133333	0.0555556	0.181818	0.0666667	0.0434783	0.037037	0.125	0.115385	0.125	0.1875	0	0.0833333	0.2
eldeline	0.05	0.047619	0.0625	0.125	0.0625	0.0833333	0.103448	0.166667	0.1	0.4	0.0714286	0.166667	0.166667	0.210526	0.117647	0.176471	0.176471	0	0.272727	0	0	0.2	0.0833333	0.210526	0	0.166667	0.137931	0.176471	0.176471	0.133333	0.047619	0	0.0434783	0.217391	0.230769	0.166667	0.117647	0.105263	0	0.125	0.130435	0.0714286	0.333333	0.192308	0.111111	0.105263	0.133333	0	0.176471
ellipticine	0.227273	0.217391	0.0952381	0.0909091	0.0952381	0.117647	0.225806	0.0526316	0.0769231	0.08	0.05	0.173913	0.0384615	0.16	0.136364	0.0833333	0	0	0.259259	0.136364	0	0	0.153846	0.115385	0.0416667	0.08	0.258065	0.181818	0.0833333	0	0.166667	0.0434783	0.111111	0.172414	0.222222	0.0384615	0.190476	0.421053	0	0.0434783	0.185185	0.125	0.0833333	0.0882353	0.130435	0.173913	0.0952381	0.05	0.0833333
emetine	0.129032	0.2	0.148148	0.103448	0.148148	0	0.4375	0.166667	0.384615	0.296296	0.16	0.129032	0.346154	0.233333	0.1	0.259259	0.259259	0.269231	0.235294	0.178571	0.36	0.28	0.558824	0.275862	0.1	0.296296	0.342857	0.133333	0.214286	0.291667	0.125	0.142857	0.1875	0.4	0.0344828	0.25	0.1	0.0606061	0.208333	0.230769	0.25	0.333333	0.214286	0.5	0.214286	0.206897	0.148148	0.0740741	0.259259
enalapril	0.0588235	0.0555556	0.166667	0.153846	0.166667	0.25	0	0	0	0.0588235	0.0909091	0.384615	0.125	0.111111	0.142857	0.214286	0.0625	0.0666667	0.136364	0.0666667	0.0625	0	0.0588235	0	0	0.125	0.153846	0.214286	0.133333	0	0	0	0.05	0.0869565	0.444444	0.125	0.142857	0.125	0	0.0714286	0.0952381	0.08	0.214286	0.12	0.214286	0.125	0.0769231	0.0909091	0.0625
enilconazole	0.222222	0.0952381	0.285714	0.0555556	0.125	0.0769231	0.222222	0	0.15	0.157895	0	0.047619	0.157895	0.0909091	0.111111	0.05	0.166667	0.111111	0.208333	0.0526316	0.166667	0.0555556	0.25	0.142857	0.25	0.157895	0.214286	0.235294	0.3125	0	0.210526	0.1875	0.190476	0.115385	0	0.157895	0.176471	0.157895	0	0.0555556	0.227273	0.148148	0.105263	0.103448	0	0.047619	0.2	0.0666667	0
enoxacin	0	0.0588235	0.0833333	0.4	0	0.125	0.0769231	0.111111	0.0588235	0.0625	0.1	0.214286	0.0625	0.1875	0.0714286	0.0666667	0.0666667	0.153846	0.0909091	0	0.142857	0.0769231	0.09375	0.1875	0.153846	0	0.115385	0.142857	0	0.181818	0.0588235	0.166667	0	0.0909091	0.2	0.214286	0.0714286	0	0.1	0	0.157895	0.130435	0	0.227273	0.230769	0.0625	0	0.1	0.142857
epiandrosterone	0.315789	0.181818	0.166667	0.1	0.105263	0	0.16129	0	0.130435	0.0869565	0	0.136364	0.0869565	0.173913	0.0454545	0.142857	0.142857	0.15	0.142857	0.352941	0.0434783	0	0.162162	0.125	0.277778	0.315789	0.321429	0.0909091	0.142857	0.05	0.238095	0.1	0.333333	0.185185	0.0526316	0.0869565	0.277778	0.0416667	0.0555556	0.222222	0.2	0.0967742	0.0909091	0.09375	0.0909091	0.0869565	0.105263	0.117647	0.0434783
epirizole	0.125	0.0555556	0	0.153846	0.166667	0	0.16	0.222222	0.1875	0	0.333333	0.2	0.2	0.111111	0.142857	0.214286	0.0625	0.333333	0.136364	0.333333	0.214286	0.25	0.2	0.0526316	0.142857	0.2	0.111111	0.0625	0.0625	0.166667	0.117647	0.0714286	0.166667	0.315789	0.0833333	0.125	0.142857	0	0.333333	0.363636	0.15	0.125	0.0625	0.217391	0.416667	0.285714	0	0.333333	0.307692
epitiostanol	0.136364	0.04	0.05	0.222222	0.166667	0.0625	0.125	0.125	0.130435	0.190476	0.117647	0.190476	0.136364	0.227273	0.352941	0.142857	0.411765	0.15	0.0666667	0.0454545	0.2	0.047619	0.131579	0.227273	0.210526	0.190476	0.121212	0.263158	0.142857	0.166667	0.130435	0.222222	0.12	0.185185	0.0526316	0.315789	0.15	0.0869565	0.0555556	0.157895	0.304348	0.259259	0.0909091	0.25	0.263158	0.136364	0.05	0.117647	0.0909091
epivincamine	0.115385	0.2	0.136364	0.0833333	0.0869565	0	0.6	0.047619	0.25	0.208333	0.0952381	0.0357143	0.380952	0.148148	0.0384615	0.217391	0.12	0.173913	0.241379	0.08	0.272727	0.3	0.516129	0.148148	0.0384615	0.16	0.242424	0.037037	0.272727	0.136364	0.153846	0.0833333	0.0322581	0.384615	0.0434783	0.26087	0.0384615	0.208333	0.15	0.0833333	0.307692	0.225806	0.217391	0.344828	0.166667	0.115385	0.25	0	0.272727
equilin	0.2	0.192308	0.0833333	0.125	0.0833333	0.1	0.138889	0	0.107143	0.153846	0.0909091	0.304348	0.153846	0.230769	0.12	0.16	0.208333	0.037037	0.193548	0.166667	0.0740741	0.0384615	0.2	0.0322581	0.12	0.153846	0.235294	0.16	0.115385	0.04	0.0689655	0.08	0.269231	0.193548	0.190476	0.2	0.166667	0.0714286	0	0.08	0.166667	0.3	0.0740741	0.25	0.115385	0.0714286	0.04	0.0434783	0.115385
erastin	0.409091	0.28	0.125	0.037037	0.125	0	0.4	0.0909091	0.185185	0.148148	0.0869565	0.0333333	0.107143	0.178571	0.0740741	0.153846	0.153846	0.208333	0.461538	0.208333	0.111111	0.166667	0.361111	0.222222	0.208333	0.148148	0.433333	0.0714286	0.363636	0.125	0.28	0.037037	0.416667	0.1875	0.04	0.0689655	0.115385	0.24	0.0869565	0.12	0.2	0.212121	0.2	0.242424	0.0714286	0.0689655	0.285714	0.0869565	0.111111
ergocalciferol	0.047619	0.0454545	0.0588235	0.0555556	0.125	0	0.222222	0.153846	0.15	0.157895	0.230769	0.047619	0.222222	0.0434783	0.111111	0.166667	0.166667	0.25	0.115385	0.111111	0.5	0.266667	0.290323	0.142857	0.111111	0.294118	0.0967742	0.235294	0.235294	0.125	0.0952381	0.117647	0.136364	0.45	0	0.1	0.111111	0.047619	0.230769	0.266667	0.285714	0.192308	0.105263	0.230769	0.235294	0.222222	0.0588235	0.142857	0.166667
erythromycin	0.0555556	0.0526316	0.25	0.142857	0.0714286	0.1	0.111111	0.0909091	0.25	0.266667	0.0833333	0.1875	0.1875	0.105263	0.214286	0.2	0	0	0.04	0.133333	0.125	0.0666667	0.15625	0.105263	0.214286	0.117647	0.0333333	0.285714	0.0588235	0.0714286	0.176471	0.142857	0.1	0.238095	0	0.1875	0.133333	0	0.0833333	0.142857	0.263158	0.166667	0.0588235	0.16	0.0588235	0.117647	0.0714286	0.0833333	0.125
esculetin	0.142857	0.0869565	0.176471	0.235294	0.176471	0.142857	0.0606061	0	0.0869565	0.2	0.0588235	0.142857	0.2	0.130435	0.375	0.15	0.352941	0.1	0.107143	0.1	0.210526	0.105263	0.235294	0.130435	0.222222	0.142857	0.125	0.277778	0.0952381	0.111111	0.0869565	0.4	0.285714	0.107143	0.0555556	0.2	0.157895	0.0434783	0	0.166667	0.208333	0.269231	0.0952381	0.307692	0.15	0.142857	0.0526316	0.2	0.15
esculin	0.105263	0.157895	0.0625	0.0588235	0.0625	0.0833333	0.185185	0.0769231	0.294118	0.105263	0.0714286	0.105263	0.166667	0.0454545	0.117647	0.25	0.0526316	0.117647	0.166667	0.117647	0.111111	0.2	0.181818	0.210526	0.0555556	0.166667	0.137931	0	0.176471	0.214286	0.157895	0.0588235	0.0909091	0.272727	0.142857	0.05	0.1875	0.105263	0.25	0.125	0.181818	0.111111	0.176471	0.0689655	0.176471	0.105263	0.133333	0.0714286	0.111111
estradiol	0.0869565	0.0833333	0.05	0.294118	0.05	0.133333	0.0909091	0.125	0.0833333	0.25	0.117647	0.25	0.0869565	0.227273	0.277778	0.142857	0.2	0.0454545	0.103448	0.0454545	0.0909091	0.047619	0.075	0.173913	0.15	0.190476	0.121212	0.411765	0.0909091	0.05	0.181818	0.1	0.0769231	0.185185	0.176471	0.190476	0.210526	0.0416667	0.0555556	0.1	0.25	0.214286	0.0434783	0.206897	0.2	0.0869565	0	0.1875	0.0909091
estriol	0.181818	0.227273	0.1	0.15	0	0	0.321429	0.0555556	0.173913	0.181818	0.0526316	0.04	0.130435	0.0769231	0.0909091	0.0416667	0.190476	0.2	0.1	0	0.25	0.0952381	0.333333	0.217391	0.142857	0.181818	0.151515	0.190476	0.136364	0.1	0.173913	0.210526	0.115385	0.32	0	0.238095	0.0434783	0.181818	0.111111	0.0454545	0.192308	0.296296	0	0.285714	0.136364	0.0833333	0.1	0.0526316	0.0416667
estrone	0.15	0.142857	0.0555556	0.25	0	0	0.133333	0.0666667	0.0909091	0.210526	0.0625	0.0454545	0.210526	0.25	0.105263	0.157895	0.222222	0.105263	0.2	0.05	0.157895	0.0526316	0.205882	0.315789	0.166667	0.0952381	0.166667	0.157895	0.1	0.1875	0.142857	0.176471	0.181818	0.2	0.0588235	0.277778	0.105263	0	0.0625	0.111111	0.166667	0.185185	0.047619	0.32	0.1	0.15	0.0555556	0.0625	0.157895
estropipate	0	0.0416667	0.0526316	0.166667	0.176471	0.142857	0.0606061	0.0625	0.136364	0.333333	0.2	0.333333	0.263158	0.181818	0.157895	0.277778	0.277778	0.047619	0.24	0.047619	0.15	0.105263	0.166667	0.0833333	0.047619	0.2	0.16129	0.277778	0.210526	0.176471	0.0416667	0.105263	0.08	0.291667	0.266667	0.263158	0.047619	0.0434783	0	0.05	0.26087	0.178571	0.210526	0.416667	0.210526	0.142857	0.111111	0.0588235	0.15
etacrynic acid	0.153846	0.291667	0.181818	0.08	0.130435	0.047619	0.322581	0.0952381	0.148148	0.0344828	0.142857	0.0714286	0.111111	0.103448	0.12	0.0740741	0.0357143	0.217391	0.121212	0.166667	0.26087	0.125	0.411765	0.230769	0.217391	0.0344828	0.3125	0.115385	0.16	0.0833333	0.192308	0.125	0.222222	0.0882353	0	0.111111	0.12	0.25	0.0909091	0.125	0.25	0.444444	0.0740741	0.25	0.208333	0.25	0.130435	0.0909091	0.115385
etamivan	0.117647	0.0526316	0.0714286	0.0666667	0.153846	0.1	0.2	0.0909091	0.25	0.117647	0.0833333	0.1875	0.266667	0.105263	0.133333	0.125	0.125	0.133333	0.130435	0.133333	0.2	0.230769	0.233333	0.05	0.0625	0.117647	0.148148	0.2	0	0.0714286	0.176471	0.230769	0.222222	0.368421	0.0769231	0.117647	0.133333	0	0.0833333	0.230769	0.142857	0.12	0.125	0.26087	0.125	0.1875	0	0.0833333	0.285714
etamsylate	0.117647	0.111111	0	0	0	0	0.2	0.2	0.25	0.461538	0.0833333	0	0.117647	0.105263	0.0625	0.125	0.125	0.0625	0.3	0	0	0.142857	0.15625	0.166667	0.0625	0.1875	0.107143	0.125	0.285714	0.25	0.176471	0	0.047619	0.3	0.0769231	0	0.0625	0.117647	0.0833333	0.0666667	0.142857	0.12	0.2	0.16	0	0	0.25	0	0.125
etanidazole	0.0555556	0.111111	0.0714286	0.142857	0.153846	0	0.2	0.2	0.25	0.0555556	0.3	0.117647	0.266667	0.166667	0.133333	0.384615	0.0588235	0.214286	0.181818	0.307692	0.2	0.230769	0.233333	0.05	0.214286	0.117647	0.107143	0.0588235	0.125	0.25	0.176471	0.0666667	0.157895	0.3	0	0.117647	0.0625	0	0.444444	0.333333	0.2	0.12	0	0.26087	0.384615	0.266667	0.0714286	0.3	0.384615
ethambutol	0	0.05	0.230769	0.214286	0.142857	0	0.192308	0.0833333	0.105263	0.176471	0.0769231	0	0.25	0.1	0.285714	0.117647	0.117647	0.0588235	0.173913	0.0588235	0.117647	0.307692	0.225806	0.157895	0.125	0.176471	0.0666667	0.117647	0.1875	0.0666667	0	0.214286	0.0454545	0.173913	0	0.25	0.0588235	0.111111	0.166667	0.214286	0.190476	0.16	0.117647	0.153846	0.1875	0.428571	0.0666667	0.272727	0.1875
ethaverine	0.210526	0.142857	0.266667	0.0526316	0.117647	0	0.307692	0	0.2	0.15	0.0625	0.0952381	0.210526	0.0416667	0.05	0.157895	0.047619	0.166667	0.25	0.3125	0.1	0	0.322581	0.136364	0.166667	0.210526	0.25	0.1	0.222222	0.0555556	0.263158	0.111111	0.238095	0.2	0	0.15	0.105263	0.210526	0.0625	0.111111	0.333333	0.230769	0.047619	0.178571	0.1	0.15	0.266667	0.133333	0.047619
ethionamide	0.0769231	0	0.111111	0	0.111111	0.2	0	0	0.0714286	0	0	0.166667	0	0	0.0909091	0	0.0833333	0.2	0	0.0909091	0.181818	0.1	0.103448	0	0.0909091	0.0769231	0.0833333	0.181818	0	0	0.0714286	0.222222	0.214286	0.105263	0.125	0	0.2	0	0	0.222222	0	0.0952381	0.181818	0.0434783	0	0.0769231	0	0	0
ethisterone	0.153846	0.192308	0.130435	0.125	0.238095	0.047619	0.464286	0.0454545	0.291667	0.153846	0.0434783	0.2	0.363636	0.185185	0.12	0.208333	0.115385	0.217391	0.193548	0.12	0.26087	0.285714	0.454545	0.142857	0.12	0.25	0.2	0.115385	0.26087	0.238095	0.192308	0.08	0.1	0.37037	0.0416667	0.25	0.12	0.153846	0.2	0.125	0.25	0.181818	0.26087	0.290323	0.16	0.0714286	0.181818	0.0434783	0.115385
ethosuximide	0.16129	0.275862	0.103448	0.1	0.142857	0	0.740741	0.0740741	0.275862	0.125	0.111111	0.0909091	0.241379	0.151515	0.0625	0.166667	0.129032	0.307692	0.34375	0.172414	0.296296	0.222222	0.8	0.1875	0.133333	0.16129	0.371429	0.0606061	0.206897	0.230769	0.193548	0.178571	0.181818	0.387097	0.0333333	0.2	0.030303	0.285714	0.2	0.178571	0.28125	0.40625	0.09375	0.4375	0.206897	0.2	0.185185	0.0714286	0.25
ethotoin	0.04	0.227273	0.157895	0.15	0.1	0.0588235	0.275862	0.0555556	0.227273	0.130435	0.0526316	0.130435	0.238095	0.272727	0.0434783	0.190476	0.0869565	0.142857	0.32	0.0909091	0.25	0.210526	0.294118	0.0769231	0.0434783	0.181818	0.225806	0.136364	0.190476	0.047619	0.08	0.0454545	0.0740741	0.222222	0.105263	0.181818	0.142857	0.130435	0.176471	0.15	0.0689655	0.09375	0.136364	0.16129	0.0869565	0.238095	0.157895	0.0526316	0.25
ethoxyquin	0.222222	0.0952381	0.125	0.0555556	0.0588235	0	0.0645161	0.0714286	0.15	0.157895	0.0666667	0.1	0.1	0	0.111111	0.105263	0.166667	0.111111	0.115385	0.176471	0.05	0	0.176471	0.263158	0.0526316	0.157895	0.259259	0.105263	0.105263	0.125	0.0952381	0.1875	0.315789	0.0740741	0.133333	0.1	0.0526316	0.1	0	0.1875	0.173913	0.291667	0.105263	0.185185	0	0.157895	0.125	0.0666667	0
eticlopride	0.2	0.0869565	0.176471	0.05	0.176471	0.0666667	0.09375	0.133333	0.315789	0.333333	0.0588235	0.333333	0.142857	0.04	0.222222	0.0952381	0.210526	0.157895	0.107143	0.157895	0.0952381	0.05	0.2	0.3	0.047619	0.333333	0.241379	0.277778	0.0454545	0.176471	0.25	0.235294	0.285714	0.192308	0.117647	0.142857	0.157895	0.142857	0.0588235	0.166667	0.16	0.222222	0.277778	0.172414	0.0454545	0.2	0.0526316	0.125	0
etidronic acid	0.047619	0	0.125	0.1875	0.125	0.0769231	0.137931	0.25	0.15	0.466667	0.230769	0.1	0.157895	0.2	0.25	0.105263	0.235294	0.111111	0.16	0	0.105263	0.1875	0.142857	0.411765	0.0526316	0.157895	0.0967742	0.235294	0.166667	0.285714	0.0952381	0.117647	0.0416667	0.208333	0.133333	0.222222	0.0526316	0.1	0.0666667	0.0555556	0.227273	0.192308	0.3125	0.28	0.235294	0.1	0.125	0.142857	0.105263
etifenin	0.0434783	0.0416667	0.176471	0.3125	0.176471	0.230769	0.0606061	0.133333	0.136364	0.333333	0.125	0.333333	0.142857	0.3	0.294118	0.210526	0.15	0.047619	0.24	0.047619	0.0952381	0.166667	0.105263	0.181818	0.1	0.142857	0.125	0.352941	0.0952381	0.0526316	0.0869565	0.105263	0.08	0.148148	0.266667	0.263158	0.157895	0.0909091	0	0.05	0.16	0.0645161	0.352941	0.259259	0.15	0.0909091	0.176471	0.125	0.15
etilefrine	0.05	0	0.307692	0.285714	0.307692	0.181818	0.0322581	0	0.1	0.105263	0.0714286	0.235294	0.166667	0.15	0.357143	0.111111	0.176471	0.117647	0.12	0.1875	0.176471	0.0588235	0.181818	0.0952381	0.266667	0.166667	0.178571	0.333333	0.111111	0.0625	0.1	0.384615	0.2	0.037037	0.142857	0.105263	0.266667	0	0	0.285714	0.3	0.153846	0.111111	0.24	0.176471	0.166667	0.133333	0.25	0.111111
etiocholanolone	0.181818	0.08	0.222222	0.15	0.375	0.125	0.193548	0.117647	0.285714	0.238095	0.111111	0.238095	0.238095	0.217391	0.333333	0.25	0.25	0.142857	0.178571	0.142857	0.190476	0.0952381	0.189189	0.12	0.2	0.368421	0.1875	0.25	0.25	0.157895	0.227273	0.15	0.16	0.137931	0.105263	0.3	0.263158	0.04	0.0526316	0.0952381	0.291667	0.166667	0.25	0.241379	0.136364	0.04	0.222222	0.111111	0.0416667
etodolac	0.1875	0.111111	0	0.230769	0.0714286	0.222222	0.0714286	0.0909091	0.0526316	0.0555556	0.0833333	0.266667	0	0.3125	0.133333	0.125	0	0.133333	0.238095	0.307692	0.0588235	0.0666667	0.0571429	0.105263	0.0625	0.117647	0.148148	0.2	0	0	0.0526316	0	0.1	0.0833333	0.4	0.0555556	0.416667	0	0	0.142857	0.0909091	0.0769231	0.125	0.115385	0.125	0.0555556	0.0714286	0.0833333	0.125
etofenamate	0.15	0.0909091	0.0555556	0.333333	0.0555556	0	0.214286	0.0666667	0.0434783	0.15	0.133333	0.0952381	0.277778	0.388889	0.105263	0.157895	0.157895	0.235294	0.363636	0.166667	0.294118	0.25	0.322581	0.136364	0.235294	0.0454545	0.129032	0.222222	0.157895	0.0555556	0.0909091	0.111111	0.181818	0.25	0.0588235	0.352941	0.05	0.0952381	0.0625	0.111111	0.217391	0.185185	0.1	0.434783	0.222222	0.210526	0.117647	0.133333	0.466667
etofylline	0.105263	0.157895	0.0625	0.125	0.0625	0	0.28	0	0.157895	0.166667	0.0714286	0.166667	0.235294	0.210526	0	0.25	0.176471	0.266667	0.217391	0.1875	0.176471	0.125	0.3	0.15	0.1875	0.05	0.137931	0.0526316	0.176471	0.307692	0.157895	0.125	0.142857	0.272727	0	0.235294	0	0.105263	0.153846	0.2	0.181818	0.25	0.111111	0.347826	0.176471	0.166667	0.133333	0.0714286	0.25
etomidate	0.117647	0.0526316	0.0714286	0.0666667	0.0714286	0	0.2	0.0909091	0.25	0.266667	0	0.0555556	0.117647	0.05	0.133333	0	0.2	0.133333	0.130435	0	0.0588235	0.0666667	0.193548	0.05	0.0625	0.266667	0.107143	0.2	0.125	0.0714286	0.111111	0.230769	0.047619	0.238095	0	0.1875	0.0625	0.117647	0	0.230769	0.142857	0.217391	0	0.16	0	0.117647	0.153846	0	0.0588235
etoposide	0.25	0.291667	0.238095	0	0.3	0.1	0.171429	0.0454545	0.148148	0.0344828	0.0434783	0.25	0.153846	0.103448	0.166667	0.16	0.0357143	0.166667	0.193548	0.272727	0.115385	0.08	0.297297	0.103448	0.166667	0.153846	0.4	0.0740741	0.16	0.0833333	0.192308	0.08	0.32	0.0882353	0.0869565	0.0714286	0.272727	0.304348	0.0909091	0.173913	0.206897	0.258065	0.208333	0.111111	0.115385	0.25	0.130435	0.0909091	0.0357143
etynodiol	0.166667	0.115385	0.0909091	0.25	0.142857	0.0526316	0.3	0.05	0.208333	0.12	0.1	0.217391	0.217391	0.2	0.181818	0.125	0.227273	0.130435	0.206897	0.0833333	0.125	0.136364	0.314286	0.0714286	0.181818	0.272727	0.212121	0.173913	0.227273	0.0909091	0.115385	0.136364	0.0689655	0.296296	0.15	0.272727	0.0833333	0.217391	0.1	0.136364	0.269231	0.233333	0.08	0.266667	0.227273	0.12	0.142857	0.1	0.125
eucatropine	0	0	0.0909091	0.3	0	0	0.125	0	0	0.230769	0	0	0.142857	0.125	0.0769231	0.0714286	0	0.0769231	0.15	0.0769231	0.0714286	0.3	0.133333	0.125	0	0.0666667	0	0.153846	0.0714286	0.0909091	0.0625	0.0833333	0	0.15	0	0.230769	0	0	0	0.0833333	0.105263	0.0869565	0.153846	0.181818	0	0.142857	0.0909091	0.111111	0.153846
exemestane	0.241379	0.275862	0.103448	0.0645161	0.142857	0.037037	0.46875	0.0740741	0.321429	0.241379	0.0714286	0.125	0.285714	0.0857143	0.0967742	0.166667	0.166667	0.259259	0.34375	0.133333	0.25	0.222222	0.6875	0.225806	0.0625	0.241379	0.411765	0.129032	0.206897	0.230769	0.275862	0.178571	0.258065	0.387097	0.107143	0.125	0.0967742	0.285714	0.153846	0.1	0.28125	0.363636	0.25	0.352941	0.0606061	0.125	0.185185	0.0714286	0.129032
exisulind	0.117647	0	0.153846	0.230769	0.0714286	0	0.153846	0.0909091	0.111111	0.1875	0.0833333	0.1875	0.1875	0.166667	0.133333	0.0588235	0.125	0.133333	0.04	0.0625	0.2	0	0.121212	0.3125	0.133333	0.117647	0.0689655	0.125	0.0588235	0.0714286	0	0.142857	0.047619	0.130435	0	0.357143	0.133333	0.0555556	0	0.142857	0.263158	0.166667	0.125	0.16	0.125	0.117647	0.0714286	0.0833333	0.125
F0447-0125	0.16	0.111111	0.0869565	0	0.0869565	0	0.212121	0.222222	0.153846	0.16	0.210526	0.115385	0.16	0.107143	0.08	0.12	0.12	0.173913	0.125	0.125	0.217391	0.130435	0.305556	0.192308	0.0384615	0.208333	0.366667	0.12	0.166667	0.0869565	0.0714286	0.04	0.185185	0.285714	0.142857	0.0740741	0.173913	0.115385	0.0952381	0.181818	0.214286	0.310345	0.217391	0.258065	0.166667	0.16	0.0869565	0.0454545	0.166667
famotidine	0.157895	0.210526	0.0588235	0	0.125	0.166667	0.178571	0	0.4375	0.157895	0.0666667	0.375	0.222222	0.0909091	0.0526316	0.235294	0.05	0.111111	0.16	0.176471	0.166667	0.117647	0.212121	0.142857	0.0526316	0.222222	0.133333	0.105263	0.05	0.125	0.277778	0.0555556	0.190476	0.318182	0.133333	0.1	0.176471	0.1	0.230769	0.0555556	0.0384615	0.0689655	0.166667	0.0666667	0.105263	0.047619	0.0588235	0.0666667	0.105263
famprofazone	0.269231	0.307692	0.0740741	0.111111	0.0740741	0	0.375	0.0833333	0.133333	0.178571	0.08	0.03125	0.178571	0.206897	0.107143	0.185185	0.103448	0.148148	0.428571	0.148148	0.0666667	0.2	0.416667	0.206897	0.148148	0.0645161	0.40625	0.103448	0.230769	0.16	0.307692	0.0714286	0.285714	0.212121	0.0769231	0.1	0.0333333	0.222222	0.125	0.111111	0.1875	0.3125	0.142857	0.34375	0.0666667	0.178571	0.16	0.125	0.230769
fasudil	0.181818	0.35	0	0.0454545	0.1	0.125	0.37037	0.1875	0.125	0.130435	0.176471	0.0833333	0.0833333	0.166667	0.142857	0.136364	0.136364	0.2	0.222222	0	0.190476	0.0952381	0.294118	0.12	0.142857	0.0833333	0.310345	0.315789	0.190476	0.1	0.227273	0.0952381	0.0740741	0.269231	0.166667	0.04	0.0909091	0.181818	0.176471	0.15	0.192308	0.25	0	0.285714	0.190476	0.130435	0.047619	0.111111	0.136364
felbinac	0.047619	0	0.125	0.1875	0.2	0.166667	0.03125	0.153846	0.210526	0.466667	0.142857	0.294118	0.157895	0.2	0.333333	0.05	0.235294	0	0.115385	0	0.05	0.117647	0.111111	0.2	0.111111	0.222222	0.0625	0.3125	0.05	0.125	0.0952381	0.1875	0.136364	0.16	0.133333	0.222222	0.111111	0.047619	0	0.0555556	0.173913	0.148148	0.235294	0.230769	0.05	0.047619	0.0588235	0.142857	0.05
felodipine	0.409091	0.230769	0.173913	0	0.08	0.0454545	0.3125	0.0909091	0.185185	0.148148	0.0869565	0.148148	0.148148	0.1	0.0740741	0.111111	0.0714286	0.16	0.266667	0.16	0.153846	0.166667	0.361111	0.222222	0.16	0.192308	0.433333	0.0714286	0.2	0.0384615	0.103448	0.037037	0.307692	0.266667	0.0833333	0.0689655	0.208333	0.24	0.0869565	0.217391	0.241379	0.290323	0.2	0.171429	0.0714286	0.107143	0.125	0.0416667	0.111111
fenbendazole	0.2	0.148148	0.238095	0.08	0.130435	0.047619	0.28125	0.0952381	0.192308	0.111111	0.0909091	0.0714286	0.111111	0.142857	0.217391	0.115385	0.0740741	0.12	0.193548	0.217391	0.208333	0.125	0.333333	0.28	0.217391	0.111111	0.354839	0.208333	0.16	0	0.24	0.125	0.375	0.0882353	0	0.153846	0.217391	0.111111	0.0434783	0.173913	0.25	0.344828	0.115385	0.176471	0.115385	0.2	0.130435	0.0909091	0.115385
fenbufen	0.117647	0	0.25	0.0666667	0.153846	0	0.111111	0.0909091	0.176471	0.461538	0	0.0555556	0.266667	0.05	0.307692	0.125	0.2	0	0.0833333	0.0625	0.0588235	0.0666667	0.15625	0.235294	0.0625	0.266667	0.0689655	0.2	0.2	0.153846	0.0526316	0.230769	0.047619	0.130435	0	0.357143	0.133333	0.0555556	0	0.0666667	0.411765	0.272727	0.125	0.16	0.0588235	0.117647	0.0714286	0.0833333	0
fendiline	0.16	0.111111	0.25	0	0.0869565	0.05	0.37931	0.047619	0.25	0.0740741	0.0952381	0.115385	0.115385	0.0689655	0.0384615	0.0769231	0.12	0.125	0.125	0.173913	0.272727	0.181818	0.382353	0.347826	0.173913	0.115385	0.518519	0.12	0.166667	0.0869565	0.304348	0.181818	0.28	0.2	0.0434783	0.0740741	0.125	0.115385	0.0952381	0.130435	0.307692	0.266667	0.166667	0.21875	0.12	0.16	0.0869565	0	0.0769231
fenofibrate	0.2	0.0555556	0.0769231	0.0714286	0.166667	0.25	0.0740741	0.1	0.1875	0.125	0.0909091	0.125	0.0588235	0.111111	0.230769	0	0.0625	0	0.190476	0.0666667	0.0625	0.153846	0.0909091	0.25	0.0666667	0.0588235	0.153846	0.214286	0	0	0.1875	0.0714286	0.3125	0.0869565	0.0833333	0	0.142857	0.0588235	0	0.0714286	0.0952381	0.08	0.133333	0.0769231	0.0625	0.0588235	0	0.0909091	0.0625
fenoprofen	0.105263	0.1	0.0625	0.125	0.0625	0.181818	0.103448	0.166667	0.222222	0.3125	0.0714286	0.166667	0.05	0.15	0.117647	0.176471	0.111111	0.0555556	0.272727	0.0555556	0.111111	0.285714	0.114286	0.210526	0.0555556	0.166667	0.178571	0.25	0.111111	0.133333	0.157895	0.0588235	0.142857	0.166667	0.230769	0.05	0.1875	0	0	0.0588235	0.0833333	0.0714286	0.333333	0.192308	0.0526316	0	0.133333	0	0.176471
fenoterol	0.130435	0.173913	0.1	0.15	0.047619	0	0.15625	0.1875	0.173913	0.3	0.111111	0	0.130435	0.217391	0.2	0.25	0.190476	0.0909091	0.222222	0.263158	0.136364	0.0454545	0.222222	0.333333	0.263158	0.238095	0.1875	0.25	0.190476	0.157895	0.227273	0.15	0.208333	0.178571	0.05	0.130435	0.2	0.0833333	0.111111	0.210526	0.291667	0.25	0.0416667	0.2	0.136364	0.3	0.1	0.176471	0.190476
fenspiride	0	0.1	0.133333	0.125	0.133333	0.181818	0.333333	0	0.222222	0.105263	0.0714286	0.166667	0.235294	0.15	0.0555556	0.25	0	0.117647	0.272727	0.117647	0.25	0.285714	0.3	0.0454545	0.0555556	0.05	0.1	0.0526316	0.176471	0.133333	0.157895	0.125	0.0434783	0.272727	0.142857	0.166667	0.1875	0.05	0.0714286	0.125	0.181818	0.0714286	0.25	0.192308	0.0526316	0.105263	0.214286	0	0.333333
finasteride	0.142857	0.0869565	0.176471	0.166667	0.176471	0.230769	0.0294118	0	0.0416667	0.0909091	0.0588235	0.333333	0.142857	0.238095	0.222222	0.15	0.0952381	0	0.24	0.047619	0.0952381	0.105263	0.0769231	0.130435	0.1	0.0434783	0.16129	0.210526	0.0952381	0	0.136364	0.05	0.173913	0.0689655	0.1875	0.2	0.222222	0.142857	0	0.05	0.115385	0.1	0.210526	0.133333	0.15	0.142857	0.0526316	0.0588235	0.0952381
fipexide	0.222222	0.15	0	0	0	0	0.269231	0.25	0.352941	0.222222	0.142857	0	0.047619	0	0.0526316	0.05	0.105263	0.176471	0.208333	0	0.166667	0.1875	0.212121	0.333333	0.0526316	0.222222	0.172414	0.166667	0.235294	0.2	0.210526	0.0555556	0.136364	0.380952	0.0625	0	0.0526316	0.157895	0.142857	0.117647	0.173913	0.192308	0.105263	0.185185	0.05	0.047619	0.2	0	0
fisetin	0.285714	0.272727	0.0952381	0	0.15	0.117647	0.266667	0.0526316	0.166667	0.173913	0	0.173913	0.125	0.0357143	0.190476	0.0833333	0.0833333	0.0869565	0.259259	0.0869565	0.04	0.0909091	0.323529	0.0740741	0.0869565	0.173913	0.258065	0.130435	0.130435	0.0454545	0.166667	0.0909091	0.2	0.214286	0.1	0.08	0.190476	0.5	0	0.0909091	0.185185	0.285714	0.181818	0.0882353	0.04	0.125	0.15	0	0.04
flavoxate	0	0	0.0833333	0	0.181818	0	0.037037	0.111111	0.125	0.307692	0.1	0.133333	0.214286	0.0555556	0.153846	0.230769	0.333333	0	0.0909091	0.0714286	0.0666667	0	0.09375	0.1875	0	0.214286	0.0740741	0.0666667	0.230769	0.181818	0.0588235	0.0769231	0.0526316	0.0434783	0.0909091	0.307692	0	0.214286	0	0	0.222222	0.130435	0.230769	0.125	0.0666667	0.133333	0.181818	0	0
flecainide	0.08	0.037037	0.15	0.2	0.15	0.117647	0.151515	0.176471	0.217391	0.35	0.166667	0.227273	0.173913	0.115385	0.25	0.181818	0.368421	0.190476	0.133333	0.0869565	0.181818	0.0434783	0.216216	0.16	0.0869565	0.5	0.3	0.444444	0.181818	0.15	0.12	0.263158	0.0714286	0.214286	0.294118	0.173913	0.25	0	0.05	0.263158	0.28	0.285714	0.130435	0.275862	0.181818	0.125	0.0952381	0.166667	0.0833333
florfenicol	0	0	0.333333	0.307692	0.0666667	0	0.148148	0	0.05	0.111111	0	0.0526316	0.176471	0.1	0.125	0.117647	0.117647	0.0588235	0.08	0.125	0.0555556	0.0625	0.225806	0.047619	0.125	0.176471	0.230769	0.117647	0.117647	0	0.05	0.307692	0.0454545	0.08	0.153846	0.176471	0.125	0.0526316	0	0.307692	0.25	0.16	0.0555556	0.2	0.117647	0.176471	0.142857	0.166667	0.266667
flucloxacillin	0.0555556	0.0526316	0.153846	0.142857	0.153846	0.1	0.111111	0	0.0526316	0.0555556	0.0833333	0.1875	0.357143	0.05	0.133333	0.384615	0.125	0.133333	0.0833333	0.214286	0.2	0.0666667	0.15625	0	0.0625	0.266667	0.107143	0.0588235	0.2	0	0	0.0666667	0.047619	0.181818	0.166667	0.266667	0.307692	0.0555556	0	0.333333	0.263158	0.12	0.2	0.115385	0.2	0.266667	0.153846	0.0833333	0.2
flucytosine	0.1875	0.111111	0.0714286	0.0666667	0.0714286	0.1	0.0714286	0.0909091	0.176471	0.117647	0.0833333	0.1875	0	0.05	0.133333	0.125	0.2	0.133333	0.0833333	0.133333	0.0588235	0.0666667	0.121212	0.166667	0.214286	0.1875	0.192308	0.0588235	0.125	0.0714286	0.25	0.230769	0.157895	0.0833333	0.272727	0.0555556	0.214286	0.117647	0	0.142857	0.142857	0.0769231	0.285714	0.115385	0.0588235	0.0555556	0.153846	0.0833333	0.125
fludrocortisone	0	0.0526316	0.153846	0.230769	0.25	0.375	0.0344828	0	0.0526316	0.0555556	0.0833333	0.461538	0.0555556	0.3125	0.214286	0.125	0.125	0	0.130435	0	0.0588235	0.0666667	0.0277778	0.05	0.214286	0	0.107143	0.285714	0.125	0	0.111111	0.0666667	0.047619	0.04	0.272727	0.1875	0.133333	0.117647	0	0	0.0909091	0	0.2	0.115385	0.2	0.0555556	0.0714286	0.0833333	0.0588235
fludroxycortide	0.0526316	0	0.142857	0.307692	0.0666667	0	0.148148	0.181818	0.235294	0.333333	0.0769231	0.176471	0.176471	0.157895	0.2	0.0555556	0.266667	0.125	0.0384615	0	0.1875	0.0625	0.1875	0.222222	0.125	0.25	0.103448	0.266667	0.0555556	0.230769	0.05	0.307692	0	0.173913	0.0714286	0.428571	0.0588235	0	0.0769231	0.0625	0.315789	0.318182	0	0.304348	0.1875	0.0526316	0	0.0769231	0.117647
flufenamic acid	0.148148	0.230769	0.125	0.12	0.08	0	0.5	0.0434783	0.28	0.24	0.0416667	0.0689655	0.291667	0.1	0.0740741	0.153846	0.2	0.208333	0.225806	0.0740741	0.2	0.166667	0.633333	0.222222	0.115385	0.192308	0.264706	0.111111	0.2	0.285714	0.185185	0.272727	0.133333	0.407407	0.04	0.24	0	0.192308	0.190476	0.12	0.285714	0.37931	0.0344828	0.464286	0.153846	0.107143	0.125	0.0869565	0.153846
flumequine	0	0	0.25	0.0666667	0.25	0.1	0.0714286	0	0.111111	0.266667	0	0.117647	0.266667	0.105263	0.307692	0.0588235	0.285714	0.0625	0.0833333	0	0.125	0.230769	0.193548	0.105263	0.133333	0.0555556	0.107143	0.285714	0.2	0.153846	0.111111	0.333333	0.157895	0.130435	0	0.1875	0.0625	0.0555556	0	0.0666667	0.2	0.166667	0.285714	0.208333	0.0588235	0.1875	0.0714286	0.0833333	0.0588235
flumetasone	0.105263	0.1	0.0625	0.0588235	0.0625	0	0.185185	0.166667	0.1	0.166667	0.25	0.05	0.105263	0.15	0.117647	0.25	0.25	0.117647	0.272727	0.1875	0.111111	0.2	0.21875	0.0952381	0.357143	0.105263	0.178571	0.111111	0.428571	0.133333	0.1	0.0588235	0.2	0.217391	0.0666667	0.05	0.0555556	0.105263	0.0714286	0.2	0.238095	0.153846	0.176471	0.291667	0.176471	0.166667	0.214286	0.153846	0.25
flunarizine	0.0666667	0	0.0909091	0.3	0	0	0	0	0	0.142857	0	0.0666667	0.0666667	0.0588235	0.166667	0.0714286	0.0714286	0	0.0454545	0.0769231	0	0	0.030303	0.125	0.166667	0.142857	0.037037	0.153846	0	0	0.0625	0.181818	0.0555556	0.0952381	0	0.142857	0.0769231	0	0	0.0833333	0.166667	0.0416667	0	0.0833333	0.0714286	0.142857	0	0.25	0.0714286
flunisolide	0.0434783	0.0416667	0.0526316	0.235294	0.0526316	0	0.206897	0.133333	0.190476	0.6	0.0588235	0.142857	0.333333	0.3	0.157895	0.0952381	0.277778	0.1	0.192308	0	0.15	0.235294	0.272727	0.3	0.047619	0.2	0.0909091	0.277778	0.0952381	0.333333	0.136364	0.166667	0.0384615	0.347826	0.0555556	0.333333	0.047619	0.0434783	0.125	0.105263	0.26087	0.269231	0.15	0.36	0.15	0.0909091	0	0.0588235	0.277778
flunixin	0.2	0.0869565	0	0.05	0.0526316	0	0.25	0.214286	0.25	0.2	0.125	0.0434783	0.142857	0.130435	0.1	0.0454545	0.0952381	0.1	0.291667	0.047619	0.0952381	0.3125	0.3125	0.238095	0.047619	0.2	0.2	0.0952381	0.210526	0.111111	0.0869565	0.05	0.227273	0.47619	0.1875	0.0434783	0.1	0.142857	0.125	0.235294	0.115385	0.137931	0.210526	0.214286	0.0454545	0.0909091	0.111111	0.0588235	0.210526
fluocinonide	0.157895	0.15	0	0.1875	0.0588235	0	0.222222	0.25	0.15	0.294118	0.142857	0.047619	0.047619	0.2	0.176471	0.166667	0.166667	0.176471	0.208333	0.0526316	0.105263	0.117647	0.142857	0.2	0.333333	0.222222	0.0625	0.166667	0.235294	0.285714	0.15	0.117647	0.0416667	0.26087	0.0625	0.1	0.111111	0.1	0.142857	0.1875	0.227273	0.148148	0.105263	0.230769	0.166667	0.1	0.125	0.142857	0.235294
fluorocurarine	0	0	0.222222	0.0909091	0.222222	0	0.0833333	0	0.142857	0.153846	0	0.0714286	0.153846	0	0.181818	0.0769231	0.272727	0.0833333	0	0.0833333	0.0769231	0	0.1	0	0.0833333	0.363636	0.08	0	0.0769231	0.1	0	0.333333	0	0	0	0.153846	0.181818	0	0	0.2	0.176471	0.0909091	0.0769231	0.0416667	0.0769231	0.0714286	0.1	0.125	0.0769231
fluorometholone	0.136364	0.181818	0.105263	0	0	0.0625	0.241379	0.125	0.238095	0.136364	0.117647	0.136364	0.0869565	0.08	0	0.2	0.0909091	0.15	0.230769	0.0952381	0.0909091	0.1	0.228571	0.125	0.15	0.190476	0.275862	0.0909091	0.263158	0.166667	0.238095	0	0.12	0.28	0.176471	0	0.0952381	0.190476	0.1875	0.1	0.111111	0.172414	0.142857	0.129032	0.0434783	0.0416667	0.235294	0	0.0434783
fluoxetine	0.291667	0.333333	0.0384615	0.0769231	0.125	0	0.354839	0.0434783	0.103448	0.107143	0.0416667	0.0689655	0.107143	0.222222	0.115385	0.153846	0.0344828	0.16	0.357143	0.16	0.0714286	0.12	0.289474	0.222222	0.208333	0.0689655	0.34375	0.111111	0.2	0.125	0.454545	0.037037	0.259259	0.225806	0.04	0.107143	0.0740741	0.192308	0.136364	0.037037	0.241379	0.212121	0.111111	0.242424	0.153846	0.148148	0.125	0.0869565	0.153846
flupentixol	0.25	0.24	0.0833333	0.08	0.0833333	0.047619	0.205882	0.0952381	0.148148	0.25	0.0434783	0.111111	0.153846	0.142857	0.217391	0.208333	0.208333	0.037037	0.321429	0.166667	0	0.08	0.170732	0.454545	0.12	0.153846	0.354839	0.115385	0.16	0.130435	0.24	0.08	0.269231	0.121212	0.0869565	0.111111	0.217391	0.153846	0.0434783	0.08	0.25	0.21875	0.208333	0.176471	0.16	0.2	0.0833333	0.142857	0.0740741
fluphenazine	0.357143	0.392857	0.0967742	0.0294118	0.0625	0.0714286	0.361111	0.0333333	0.147059	0.0857143	0.0322581	0.225806	0.0555556	0.142857	0.0588235	0.121212	0.0882353	0.16129	0.285714	0.16129	0.0882353	0.09375	0.4	0.25	0.2	0.0555556	0.5625	0.0882353	0.121212	0.133333	0.392857	0.09375	0.366667	0.25	0.1	0.0555556	0.16129	0.310345	0.103448	0.09375	0.228571	0.342857	0.15625	0.230769	0.0882353	0.117647	0.0625	0.0322581	0.0571429
flurbiprofen	0.05	0	0.416667	0.125	0.214286	0.0833333	0.103448	0.166667	0.294118	0.4	0.0714286	0.166667	0.235294	0.0952381	0.266667	0.111111	0.25	0.0555556	0.0769231	0.0555556	0.111111	0.125	0.21875	0.15	0.1875	0.3125	0.178571	0.176471	0.176471	0.133333	0.047619	0.285714	0.142857	0.12	0.0666667	0.235294	0.1875	0	0	0.2	0.3	0.2	0.25	0.24	0	0.05	0.214286	0.0714286	0.0526316
fluspirilene	0.347826	0.391304	0.08	0	0.0384615	0.0454545	0.272727	0	0.103448	0.107143	0	0.148148	0.0689655	0.137931	0.0357143	0.153846	0.111111	0.115385	0.225806	0.16	0.0344828	0	0.25641	0.222222	0.16	0.0689655	0.535714	0.111111	0.111111	0.08	0.454545	0.0769231	0.307692	0.151515	0.0833333	0.0333333	0.115385	0.291667	0.0869565	0.0769231	0.16129	0.212121	0.0714286	0.171429	0.0714286	0.107143	0.08	0.0416667	0.0714286
flutamide	0.235294	0.1	0.133333	0.0588235	0.133333	0.0833333	0.142857	0.166667	0.222222	0.3125	0.0714286	0.166667	0.166667	0.0952381	0.266667	0.0526316	0.176471	0.0555556	0.0769231	0.0555556	0.176471	0.125	0.181818	0.277778	0.117647	0.166667	0.0645161	0.25	0.0526316	0.133333	0.157895	0.2	0.142857	0.166667	0	0.235294	0.1875	0.166667	0.0714286	0.0588235	0.3	0.2	0.111111	0.148148	0.0526316	0.05	0	0.0714286	0
fluticasone	0.130435	0.08	0.1	0.15	0.157895	0.2	0.0277778	0	0.0384615	0.130435	0.0526316	0.368421	0.0833333	0.333333	0.2	0.0869565	0.136364	0.0434783	0.178571	0.0909091	0.0416667	0.0952381	0.0731707	0.0769231	0.2	0.0833333	0.1875	0.25	0.0869565	0	0.227273	0.0454545	0.26087	0.137931	0.235294	0.130435	0.263158	0.0833333	0	0.0454545	0.107143	0.129032	0.25	0.125	0.136364	0.04	0.047619	0.0526316	0.0869565
fluvastatin	0.130435	0.0384615	0.157895	0.15	0.1	0.0588235	0.15625	0.0555556	0.173913	0.130435	0.0526316	0.368421	0.0833333	0.333333	0.0434783	0.190476	0.190476	0.142857	0.32	0.333333	0.0869565	0.15	0.222222	0.166667	0.263158	0.130435	0.357143	0.136364	0.190476	0.1	0.227273	0.0454545	0.318182	0.178571	0.166667	0.130435	0.142857	0.181818	0.0526316	0.0952381	0.148148	0.09375	0.388889	0.241379	0.0869565	0.0833333	0.222222	0.0526316	0.136364
fluvoxamine	0.190476	0.130435	0	0.157895	0.05	0.133333	0.125	0	0.04	0.136364	0.0555556	0.25	0.0869565	0.35	0.0952381	0.142857	0.2	0.0952381	0.28	0.210526	0.0909091	0.1	0.162162	0.173913	0.0952381	0.0869565	0.321429	0.2	0.0909091	0	0.3	0.047619	0.272727	0.142857	0.333333	0.136364	0.210526	0.0869565	0	0.047619	0.153846	0.133333	0.2	0.206897	0.0909091	0.0416667	0.05	0.0555556	0.2
folic acid	0.0526316	0.05	0.230769	0.214286	0.333333	0.333333	0.0689655	0.0833333	0.105263	0	0.166667	0.428571	0.111111	0.157895	0.2	0.117647	0	0.2	0.125	0.0588235	0.1875	0.133333	0.117647	0.047619	0.125	0.111111	0.185185	0.1875	0.117647	0.0666667	0.105263	0.0625	0.0952381	0.125	0.363636	0.111111	0.285714	0.0526316	0.0769231	0.133333	0.190476	0.0740741	0.266667	0.153846	0.266667	0.0526316	0.142857	0.0769231	0.0555556
foliosidine	0	0.0555556	0	0.25	0.0769231	0.25	0.0357143	0.1	0.0555556	0.0588235	0.2	0.2	0	0.111111	0.142857	0.133333	0.133333	0.142857	0.136364	0.0666667	0.133333	0.0714286	0.0588235	0.0526316	0.0666667	0.125	0.153846	0.307692	0	0.0769231	0.117647	0.153846	0.05	0.136364	0.3	0	0.142857	0	0.0909091	0.153846	0.0952381	0.08	0	0.166667	0.307692	0.125	0	0.2	0.133333
fosfosal	0.0588235	0.117647	0	0.153846	0.0769231	0	0.16	0	0.1875	0.125	0.0909091	0.125	0.285714	0.111111	0.0666667	0.307692	0.133333	0.142857	0.136364	0.230769	0.133333	0.0714286	0.16129	0	0.0666667	0.2	0.0714286	0.133333	0	0.166667	0.1875	0.153846	0.105263	0.315789	0	0.125	0.0666667	0	0.2	0.25	0.0952381	0.08	0	0.166667	0.214286	0.285714	0	0.2	0.307692
fulvestrant	0.0434783	0.0416667	0.0526316	0.166667	0.111111	0.0666667	0.129032	0.0625	0	0.0909091	0.125	0.2	0.0434783	0.444444	0.1	0.0454545	0.15	0.1	0.347826	0.157895	0.0952381	0.166667	0.166667	0.130435	0.157895	0	0.285714	0.210526	0.0952381	0	0.136364	0	0.173913	0.0689655	0.117647	0.0909091	0.047619	0.263158	0.0588235	0.05	0.0740741	0.137931	0.210526	0.172414	0.15	0.2	0.0526316	0.125	0.210526
furaltadone	0	0.047619	0.0625	0.2	0.0625	0	0.142857	0.0769231	0.1	0.235294	0.0714286	0.105263	0.166667	0.210526	0.117647	0.176471	0.111111	0.0555556	0.166667	0.0555556	0.0526316	0.2	0.114286	0.15	0.0555556	0.105263	0.0645161	0.111111	0.111111	0.214286	0.157895	0.0588235	0	0.217391	0.0666667	0.166667	0.0555556	0.105263	0.153846	0.125	0.181818	0.111111	0.176471	0.148148	0.25	0.166667	0.0625	0.0714286	0.25
furazolidone	0.190476	0.0833333	0.105263	0.047619	0.235294	0.133333	0.2	0.2	0.368421	0.190476	0.1875	0.190476	0.190476	0.0384615	0.277778	0.142857	0.142857	0.15	0.142857	0.0454545	0.2	0.157895	0.264706	0.173913	0.0952381	0.315789	0.15625	0.2	0.263158	0.166667	0.130435	0.1	0.0769231	0.230769	0.176471	0.136364	0.15	0.190476	0.117647	0.1	0.25	0.307692	0.2	0.206897	0.142857	0.0416667	0.235294	0.0555556	0
furosemide	0	0.125	0	0.272727	0.0833333	0.285714	0.0769231	0.111111	0.0588235	0	0.222222	0.307692	0	0.1875	0.0714286	0.0666667	0	0.0714286	0.142857	0	0.0666667	0.0769231	0.0606061	0.117647	0.0714286	0	0.16	0.142857	0	0.0833333	0.0588235	0	0	0.0909091	0.333333	0.0625	0.0714286	0	0.1	0	0.1	0.04	0	0.227273	0.333333	0	0	0.1	0.0666667
fursultiamine	0.0454545	0.0909091	0.1875	0.333333	0.117647	0	0.259259	0.0666667	0.0909091	0.210526	0.0625	0.0454545	0.210526	0.25	0.235294	0.222222	0.1	0.166667	0.304348	0.105263	0.1	0.25	0.28125	0.0869565	0.166667	0.0952381	0.129032	0.157895	0.222222	0.117647	0.142857	0.25	0.04	0.2	0.125	0.277778	0.05	0.0952381	0.133333	0.176471	0.272727	0.142857	0.157895	0.32	0.222222	0.277778	0.1875	0.214286	0.466667
fusaric acid	0	0.05	0.230769	0.307692	0.0666667	0	0.24	0	0.105263	0.0526316	0.0769231	0.111111	0.111111	0.157895	0.0588235	0.266667	0.1875	0.2	0.08	0.285714	0.266667	0.0625	0.225806	0.047619	0.285714	0.176471	0.142857	0	0.117647	0.0666667	0	0.214286	0.0454545	0.08	0	0.333333	0.125	0.0526316	0	0.214286	0.25	0.208333	0.117647	0.2	0.1875	0.176471	0.230769	0.0769231	0.266667
fusidic acid	0	0.047619	0.0625	0.285714	0.133333	0.0833333	0.142857	0.0769231	0.1	0.235294	0.153846	0.166667	0.166667	0.15	0.1875	0.0526316	0.176471	0.117647	0.12	0	0.176471	0.125	0.21875	0.277778	0.0555556	0.105263	0.1	0.25	0.111111	0.307692	0.047619	0.2	0	0.12	0.142857	0.235294	0	0	0.0714286	0	0.238095	0.304348	0.0526316	0.409091	0.333333	0.05	0	0.153846	0.111111
gabapentin	0.111111	0.105263	0.142857	0.133333	0.142857	0.0909091	0.148148	0	0.235294	0.111111	0.0769231	0.176471	0.25	0.157895	0.125	0.357143	0.0555556	0.0588235	0.173913	0.384615	0.117647	0.133333	0.1875	0.047619	0.285714	0.176471	0.103448	0.117647	0.0555556	0.142857	0.3125	0.133333	0.210526	0.227273	0	0.111111	0.2	0	0.166667	0.214286	0.190476	0.0740741	0.0555556	0.153846	0.1875	0.176471	0.0666667	0.166667	0.266667
gabexate	0.111111	0.05	0.142857	0.214286	0.230769	0.333333	0.107143	0.0833333	0.105263	0.0526316	0.0769231	0.333333	0.111111	0.157895	0.285714	0.117647	0	0.0588235	0.173913	0.0588235	0.0555556	0.133333	0.117647	0.047619	0.0588235	0.111111	0.142857	0.266667	0.0555556	0	0.105263	0.133333	0.0952381	0.173913	0.5	0.111111	0.285714	0.0526316	0	0.214286	0.136364	0.0740741	0.1875	0.153846	0.1875	0.111111	0.0666667	0.0769231	0.1875
galantamine	0	0	0.133333	0.125	0.133333	0	0.103448	0.0769231	0.157895	0.4	0.0714286	0.05	0.235294	0.0952381	0.1875	0.333333	0.538462	0.117647	0.166667	0.117647	0.176471	0.2	0.21875	0.0952381	0.0555556	0.3125	0.137931	0.111111	0.25	0.214286	0	0.285714	0.0909091	0.166667	0.0666667	0.3125	0.0555556	0.05	0	0.125	0.238095	0.2	0.333333	0.291667	0.111111	0.166667	0.214286	0.0714286	0.176471
gallamine triethiodide	0.117647	0.111111	0	0	0	0.1	0.153846	0.2	0.25	0.1875	0.181818	0.1875	0.1875	0.05	0.0625	0.285714	0.125	0.214286	0.0833333	0.133333	0.285714	0.0666667	0.193548	0.105263	0	0.1875	0.148148	0.2	0.0588235	0.153846	0.111111	0.0666667	0.1	0.368421	0.166667	0.117647	0.214286	0	0.181818	0.230769	0.2	0.272727	0.0588235	0.16	0.125	0.117647	0	0	0.125
ganciclovir	0.0625	0.0588235	0	0.0769231	0	0	0.12	0.25	0.2	0.416667	0.1	0	0.133333	0.117647	0.153846	0.230769	0.230769	0	0.2	0.0714286	0	0.166667	0.09375	0.1875	0.0714286	0.214286	0.0740741	0.0666667	0.142857	0.3	0.0588235	0.0769231	0.0526316	0.2	0.0909091	0	0.153846	0	0.1	0.166667	0.157895	0.0833333	0.230769	0.125	0.0666667	0.0625	0.0833333	0.1	0.230769
gefitinib	0.2	0.228571	0.117647	0.114286	0.117647	0	0.606061	0.129032	0.30303	0.3125	0.125	0.0769231	0.3125	0.157895	0.111111	0.205882	0.205882	0.25	0.4	0.142857	0.28125	0.21875	0.764706	0.294118	0.111111	0.272727	0.384615	0.171429	0.242424	0.225806	0.162162	0.147059	0.216216	0.441176	0.0277778	0.235294	0.0526316	0.235294	0.16129	0.181818	0.305556	0.457143	0.138889	0.485714	0.171429	0.2	0.1875	0.0909091	0.205882
geldanamycin	0.3	0.173913	0.047619	0	0	0	0.233333	0.117647	0.08	0.04	0.0526316	0.04	0	0.037037	0.0909091	0.0416667	0.0869565	0.2	0.137931	0.142857	0.0869565	0.0454545	0.257143	0.166667	0.142857	0.0833333	0.407407	0.136364	0.136364	0.047619	0.227273	0.0454545	0.318182	0.137931	0.05	0	0.142857	0.238095	0.0526316	0.210526	0.192308	0.590909	0.0416667	0.125	0.0416667	0.130435	0.1	0	0
gelsemine	0.0434783	0.0869565	0.111111	0.166667	0.25	0.142857	0.129032	0.133333	0.0869565	0.0909091	0.285714	0.263158	0.263158	0.181818	0.157895	0.277778	0.15	0.222222	0.24	0.1	0.277778	0.105263	0.235294	0.0833333	0.047619	0.2	0.241379	0.277778	0.277778	0.0526316	0	0.05	0.125	0.24	0.357143	0.2	0.157895	0.0434783	0.0588235	0.3125	0.16	0.137931	0.210526	0.36	0.352941	0.263158	0.176471	0.125	0.210526
gemfibrozil	0	0	0.0714286	0.454545	0.0714286	0	0.153846	0	0.0526316	0.1875	0	0.117647	0.1875	0.235294	0.133333	0.0588235	0.2	0.214286	0.130435	0.0625	0.2	0.230769	0.233333	0.166667	0.133333	0.0555556	0.0333333	0.125	0.0588235	0.25	0	0.333333	0.047619	0.181818	0	0.461538	0	0	0	0.142857	0.2	0.217391	0.125	0.380952	0.0588235	0.1875	0.0714286	0.0833333	0.2
genistein	0.130435	0.227273	0.047619	0.15	0.1	0.125	0.121212	0.0555556	0.0384615	0.0833333	0.111111	0.238095	0.0833333	0.333333	0.142857	0.136364	0.136364	0.0434783	0.222222	0.0909091	0.0869565	0.0454545	0.1	0.12	0.142857	0.04	0.1875	0.190476	0.136364	0.047619	0.173913	0	0.115385	0.137931	0.166667	0.181818	0.2	0.181818	0.0526316	0	0.192308	0.166667	0.0869565	0.16129	0.190476	0.130435	0.047619	0.0526316	0.0416667
gentamicin	0	0	0.142857	0.214286	0.333333	0.2	0.0689655	0.0833333	0.05	0.176471	0.166667	0.176471	0.111111	0.222222	0.285714	0.0555556	0.117647	0.125	0.173913	0.0588235	0.1875	0.307692	0.151515	0.047619	0.285714	0.176471	0.0666667	0.266667	0.1875	0.0666667	0.105263	0.133333	0.15	0.227273	0.0714286	0.0526316	0.2	0	0.0769231	0.214286	0.190476	0.0357143	0.266667	0.2	0.1875	0.111111	0.0666667	0.272727	0.1875
gibberellic acid	0	0.0526316	0.25	0.230769	0.25	0.375	0	0	0.111111	0.1875	0.0833333	0.357143	0.1875	0.166667	0.307692	0.125	0.125	0	0.181818	0.0625	0.0588235	0.142857	0.15625	0.05	0.133333	0.0555556	0.148148	0.285714	0.0588235	0.0714286	0.0526316	0.230769	0.157895	0.04	0.272727	0.117647	0.133333	0	0	0.0666667	0.142857	0.12	0.125	0.26087	0.125	0.0555556	0.0714286	0.181818	0.125
ginkgolide A	0.0416667	0.0833333	0.235294	0.157895	0.105263	0	0.44	0	0.181818	0.0869565	0.0555556	0.0869565	0.25	0.125	0.0454545	0.2	0.0434783	0.15	0.28	0.15	0.2	0.222222	0.387097	0.08	0.0952381	0.136364	0.233333	0.0434783	0.333333	0.05	0.0833333	0.1	0.037037	0.230769	0.111111	0.25	0.0454545	0.190476	0.0555556	0.157895	0.304348	0.214286	0.2	0.296296	0.142857	0.190476	0.4	0	0.263158
glafenine	0.111111	0.105263	0.0666667	0.214286	0.0666667	0	0.0689655	0	0.05	0.0526316	0	0.25	0.0526316	0.294118	0.0588235	0.0555556	0.0555556	0.0588235	0.227273	0.2	0.0555556	0.0625	0.0857143	0.1	0.125	0.0526316	0.185185	0.0555556	0	0.0666667	0.05	0.0625	0.0952381	0.0384615	0.0714286	0.176471	0.125	0.111111	0	0	0.136364	0.0740741	0.117647	0.153846	0.0555556	0.176471	0.0666667	0	0.117647
glibenclamide	0.275862	0.225806	0.137931	0.0967742	0.1	0.0357143	0.5	0.111111	0.461538	0.275862	0.107143	0.15625	0.275862	0.0833333	0.129032	0.2	0.2	0.206897	0.222222	0.129032	0.241379	0.172414	0.666667	0.258065	0.129032	0.275862	0.324324	0.16129	0.2	0.269231	0.225806	0.259259	0.212121	0.466667	0.103448	0.233333	0.09375	0.193548	0.148148	0.172414	0.3125	0.483871	0.125	0.424242	0.125	0.121212	0.137931	0.0689655	0.16129
gliclazide	0.15	0.2	0.0555556	0	0.0555556	0.0714286	0.214286	0.142857	0.333333	0.352941	0.0625	0.0454545	0.277778	0.0869565	0.105263	0.294118	0.157895	0.05	0.304348	0	0.1	0.176471	0.205882	0.25	0.05	0.210526	0.166667	0.1	0.375	0.1875	0.142857	0	0.0833333	0.304348	0.125	0.0952381	0.105263	0.15	0.133333	0.0526316	0.217391	0.142857	0.222222	0.178571	0.047619	0.0454545	0.266667	0	0.1
glimepiride	0.05	0.047619	0.0625	0.0588235	0.133333	0	0.28	0.272727	0.222222	0.105263	0.25	0	0.105263	0.0454545	0.117647	0.111111	0.111111	0.266667	0.217391	0.0555556	0.25	0.285714	0.258065	0.210526	0.1875	0.235294	0.178571	0.0526316	0.428571	0.214286	0.157895	0.125	0.0434783	0.272727	0.142857	0	0.117647	0.105263	0.25	0.2	0.3	0.111111	0.176471	0.24	0.176471	0.105263	0.307692	0.153846	0.176471
glipizide	0.0454545	0.0909091	0.0555556	0.176471	0.1875	0.153846	0.133333	0	0.0909091	0.277778	0.133333	0.352941	0.277778	0.25	0.105263	0.375	0.157895	0.105263	0.25	0.166667	0.157895	0.176471	0.171429	0.0869565	0.05	0.15	0.09375	0.157895	0.157895	0.117647	0.0909091	0	0.0833333	0.304348	0.125	0.352941	0.05	0.0952381	0.0625	0	0.217391	0.103448	0.294118	0.32	0.222222	0.0952381	0.117647	0.133333	0.157895
gliquidone	0.166667	0.1	0.133333	0.0588235	0.307692	0.181818	0.103448	0	0.222222	0.05	0	0.3125	0.3125	0.0952381	0.1875	0.176471	0.0526316	0.117647	0.166667	0.1875	0.111111	0.2	0.181818	0.0952381	0.117647	0.235294	0.137931	0.0526316	0.0526316	0.133333	0.157895	0.125	0.263158	0.166667	0.142857	0.166667	0.266667	0.05	0.153846	0.125	0.130435	0.111111	0.176471	0.107143	0.111111	0.105263	0.0625	0.0714286	0.0526316
glycocholic acid	0.0526316	0.05	0.0666667	0.214286	0.230769	0	0.24	0.181818	0.166667	0.111111	0.272727	0.111111	0.25	0.222222	0.125	0.357143	0.117647	0.285714	0.285714	0.2	0.266667	0.307692	0.225806	0.157895	0.125	0.111111	0.0666667	0.0555556	0.266667	0.333333	0.05	0.0625	0.0952381	0.227273	0.0714286	0.333333	0	0.0526316	0.166667	0.133333	0.136364	0.115385	0.266667	0.363636	0.357143	0.25	0.230769	0.166667	0.357143
glycopyrronium bromide	0.0588235	0	0.166667	0.0714286	0.0769231	0.111111	0.0357143	0	0.117647	0.0588235	0	0.2	0.0588235	0	0.142857	0.0625	0.133333	0.142857	0	0.142857	0.214286	0.153846	0.125	0.0526316	0.142857	0.285714	0.111111	0.214286	0	0	0.117647	0.25	0.166667	0.190476	0.0833333	0	0.230769	0.0588235	0.0909091	0.25	0.0454545	0.08	0.214286	0.037037	0.0625	0.2	0	0.0909091	0.0625
Gly-His-Lys	0.1875	0.111111	0.0714286	0	0.0714286	0.222222	0.0344828	0.0909091	0.111111	0.1875	0	0.266667	0	0.05	0.214286	0.0588235	0.0588235	0.0625	0.04	0.0625	0.0588235	0.0666667	0.0571429	0.105263	0.0625	0.1875	0.0689655	0.2	0	0	0.176471	0.0666667	0.222222	0.130435	0.166667	0.0555556	0.416667	0.0555556	0	0.142857	0.0434783	0.166667	0.2	0	0	0	0	0	0
gossypol	0.391304	0.375	0.12	0.0357143	0.0769231	0.0909091	0.387097	0.0869565	0.269231	0.0666667	0.0833333	0.185185	0.103448	0.133333	0.0344828	0.192308	0.107143	0.2	0.3	0.2	0.148148	0.115385	0.351351	0.36	0.25	0.142857	0.517241	0.0689655	0.148148	0.217391	0.375	0.0740741	0.346154	0.181818	0.125	0.0322581	0.153846	0.230769	0.181818	0.0740741	0.15625	0.205882	0.148148	0.2	0.148148	0.0666667	0.12	0.04	0.0689655
gramine	0.047619	0	0.125	0.357143	0.0588235	0.0769231	0.178571	0.25	0.210526	0.294118	0.230769	0.1	0.157895	0.2	0.176471	0.105263	0.3125	0.176471	0.16	0	0.235294	0.117647	0.212121	0.263158	0.0526316	0.222222	0.172414	0.4	0.105263	0.2	0.0454545	0.266667	0.0416667	0.208333	0.214286	0.294118	0.0526316	0	0.0666667	0.1875	0.173913	0.291667	0.05	0.391304	0.235294	0.157895	0.0588235	0.142857	0.166667
griseofulvin	0.047619	0.0454545	0.125	0.1875	0.0588235	0	0.178571	0	0.0952381	0.294118	0	0.1	0.1	0.263158	0.111111	0.05	0.235294	0.111111	0.115385	0.176471	0.105263	0.117647	0.25	0.263158	0.111111	0.1	0.133333	0.05	0.05	0.2	0.0952381	0.357143	0.0416667	0.0740741	0.0625	0.375	0.111111	0.1	0	0	0.227273	0.24	0.166667	0.230769	0.05	0.1	0.0588235	0.0666667	0.166667
guaifenesin	0.0952381	0.142857	0.1875	0.0526316	0.117647	0.153846	0.133333	0	0.263158	0.15	0	0.210526	0.15	0.0416667	0.166667	0.222222	0.047619	0.05	0.153846	0.105263	0.1	0.176471	0.171429	0.136364	0.105263	0.210526	0.129032	0.1	0.157895	0.117647	0.2	0.111111	0.130435	0.25	0.125	0.0454545	0.235294	0.15	0.133333	0.111111	0.12	0.0666667	0.294118	0.03125	0.1	0.15	0.117647	0.0625	0.1
guanabenz	0.136364	0.0833333	0.105263	0.222222	0.105263	0.133333	0.0285714	0	0	0.0869565	0.0555556	0.388889	0.0416667	0.227273	0.210526	0.142857	0.142857	0.0454545	0.142857	0.0952381	0	0	0.0238095	0.08	0.15	0.136364	0.193548	0.2	0.0909091	0	0.130435	0.047619	0.166667	0.103448	0.25	0.136364	0.210526	0.136364	0	0.1	0.111111	0.0967742	0.2	0.09375	0.2	0.136364	0.05	0.117647	0.0909091
guanadrel	0	0	0.0909091	0.0833333	0.0909091	0.142857	0	0	0.0625	0.142857	0	0.142857	0	0.0588235	0.166667	0.0714286	0.153846	0	0	0.0769231	0.0714286	0.0833333	0.030303	0.0588235	0.166667	0.142857	0	0.153846	0	0	0.133333	0.181818	0.117647	0.0454545	0	0.0666667	0.166667	0.0666667	0	0.0833333	0.05	0.0416667	0.153846	0	0.0714286	0.0666667	0	0.111111	0.0714286
guanethidine	0	0	0	0.222222	0	0	0.0869565	0	0	0.0769231	0	0	0.0769231	0.142857	0	0.0833333	0	0.0909091	0.105263	0.0909091	0.0833333	0.222222	0.0666667	0	0	0.0769231	0	0.0833333	0	0	0.0714286	0	0	0.105263	0	0.166667	0	0	0	0.1	0	0	0.0833333	0.0909091	0	0.0769231	0.111111	0	0.181818
guanfacine	0.0555556	0	0.0714286	0.142857	0.0714286	0	0.153846	0.0909091	0.0526316	0.1875	0	0	0.117647	0.105263	0.214286	0.125	0.2	0.0625	0.0833333	0.0625	0.0588235	0.142857	0.0882353	0.105263	0.133333	0.1875	0.0689655	0.285714	0.2	0.0714286	0.111111	0.142857	0.047619	0.238095	0	0.117647	0.133333	0.0555556	0	0.333333	0.2	0.12	0.125	0.115385	0.125	0.266667	0.0714286	0.0833333	0.125
GW-8510	0.263158	0.25	0.111111	0	0.0526316	0	0.296296	0.0625	0.0869565	0.142857	0	0.0909091	0.0434783	0.04	0.1	0.0454545	0.0454545	0.047619	0.192308	0.047619	0	0	0.2	0.130435	0.047619	0.0909091	0.2	0.0952381	0.15	0	0.136364	0	0.08	0.148148	0	0.0909091	0.047619	0.846154	0	0.05	0.16	0.222222	0.15	0.030303	0.0454545	0.2	0.176471	0	0
H-7	0.235294	0.222222	0.0625	0	0.0625	0	0.28	0.0769231	0.1	0.105263	0	0.05	0.05	0.0454545	0.117647	0.0526316	0.0526316	0.0555556	0.217391	0.0555556	0	0	0.181818	0.15	0.0555556	0.05	0.137931	0.0526316	0.176471	0	0.1	0	0.0909091	0.12	0	0.105263	0.0555556	0.75	0	0.0588235	0.181818	0.2	0.111111	0.0333333	0.0526316	0.166667	0.214286	0	0
H-89	0	0	0.0714286	0.230769	0.153846	0.1	0.153846	0.2	0.176471	0	0.3	0.117647	0.0555556	0.166667	0.214286	0.2	0.2	0.416667	0.0833333	0.214286	0.636364	0.333333	0.233333	0.105263	0.307692	0.0555556	0.0689655	0.2	0.0588235	0.153846	0.111111	0.333333	0.157895	0.181818	0	0.1875	0.133333	0	0.181818	0.230769	0.142857	0.166667	0.125	0.26087	0.384615	0.266667	0.0714286	0.181818	0.384615
halcinonide	0.0666667	0.0625	0	0.0833333	0	0	0.173913	0.125	0.0625	0	0.111111	0	0	0.125	0	0	0.25	0.4	0.0454545	0	0.25	0.0833333	0.133333	0.125	0.272727	0	0.166667	0.153846	0.153846	0.2	0.214286	0.181818	0.0555556	0.0952381	0	0.0666667	0	0.0666667	0.111111	0.0833333	0.105263	0.190476	0	0.181818	0.153846	0.0666667	0.0909091	0	0.0714286
halofantrine	0.0416667	0.0833333	0.166667	0.157895	0.166667	0.133333	0.0909091	0	0.130435	0.190476	0.0555556	0.136364	0.136364	0.125	0.277778	0.0909091	0.2	0	0.142857	0.15	0.0434783	0.1	0.194444	0.125	0.210526	0.136364	0.193548	0.263158	0.0909091	0.05	0.238095	0.222222	0.272727	0.0666667	0.0526316	0.0869565	0.0952381	0.0869565	0	0.1	0.2	0.259259	0.0909091	0.166667	0.0909091	0.190476	0.05	0.1875	0.0909091
haloperidol	0.12	0.16	0.0909091	0.190476	0.0434783	0.111111	0.181818	0.05	0.115385	0.166667	0.1	0.217391	0.037037	0.2	0.130435	0.0384615	0.125	0.04	0.166667	0.04	0.0384615	0.0416667	0.15	0.304348	0.0833333	0.0769231	0.333333	0.227273	0.0384615	0.0434783	0.318182	0.136364	0.148148	0.129032	0.210526	0.166667	0.0833333	0.0769231	0.047619	0	0.178571	0.193548	0.0384615	0.225806	0.173913	0.0769231	0	0.1	0.08
harmaline	0.0384615	0.12	0.15	0.5	0.0952381	0.0555556	0.225806	0.0526316	0.0769231	0.125	0.105263	0.125	0.173913	0.380952	0.190476	0.130435	0.238095	0.25	0.214286	0.136364	0.181818	0.2	0.285714	0.16	0.190476	0.08	0.21875	0.181818	0.0833333	0.0952381	0.0769231	0.263158	0.0714286	0.172414	0.1	0.35	0.0869565	0.08	0.05	0.142857	0.230769	0.2	0.130435	0.48	0.368421	0.285714	0.15	0.166667	0.3
harmalol	0	0.0555556	0.0769231	0.25	0.166667	0.111111	0.0357143	0.1	0.0555556	0.0588235	0.2	0.125	0.0588235	0.25	0.142857	0.214286	0.133333	0.142857	0.190476	0.142857	0.133333	0.0714286	0.0588235	0.0526316	0	0.0588235	0.111111	0.214286	0.133333	0.0769231	0	0.0714286	0.05	0.0416667	0.3	0.125	0.0666667	0.0588235	0	0.0714286	0.0454545	0.0384615	0.214286	0.217391	0.214286	0.2	0.272727	0.0909091	0.133333
harman	0.111111	0.3125	0	0.133333	0.0666667	0.0909091	0.107143	0	0.05	0	0	0.25	0.0526316	0.1	0.0588235	0.1875	0.117647	0.2	0.173913	0.285714	0.0555556	0	0.151515	0.047619	0.0588235	0.176471	0.28	0.117647	0	0.0666667	0.05	0.133333	0.15	0.125	0.25	0	0.285714	0.0526316	0.0769231	0.214286	0.0416667	0.115385	0.0555556	0.153846	0.266667	0.25	0	0.166667	0.117647
harmine	0.210526	0.411765	0.117647	0.0526316	0.0555556	0.0714286	0.259259	0	0.0434783	0	0	0.15	0.0454545	0.0869565	0.05	0.1	0	0.05	0.25	0.05	0	0	0.171429	0	0.05	0	0.25	0.047619	0.157895	0	0.0909091	0.0526316	0.04	0.111111	0.2	0.0454545	0.105263	0.533333	0	0	0.12	0.103448	0.1	0.1	0.1	0.210526	0.1875	0	0.1
harmol	0.2	0.315789	0.111111	0.05	0.111111	0.0666667	0.206897	0	0.0869565	0.0434783	0	0.333333	0.142857	0.130435	0.047619	0.15	0.0454545	0.157895	0.192308	0.157895	0.0454545	0.05	0.2	0.0833333	0.047619	0.142857	0.333333	0.0454545	0.0952381	0.0526316	0.136364	0.05	0.08	0.148148	0.266667	0.0909091	0.157895	0.333333	0.125	0.05	0.115385	0.137931	0.210526	0.133333	0.15	0.2	0.111111	0.0588235	0.0952381
harpagoside	0.05	0.047619	0.133333	0.285714	0.214286	0.181818	0.142857	0.0769231	0.157895	0.235294	0.0714286	0.3125	0.166667	0.210526	0.266667	0.111111	0.25	0.0555556	0.166667	0.0555556	0.0526316	0.0588235	0.114286	0.0952381	0.0555556	0.3125	0.137931	0.176471	0.0526316	0.0625	0	0.2	0	0.0769231	0.230769	0.235294	0.266667	0.05	0	0.285714	0.181818	0.111111	0.111111	0.148148	0.176471	0.105263	0.0625	0.153846	0.176471
HC toxin	0.12	0.208333	0.0434783	0.0416667	0.0434783	0	0.3	0.05	0.16	0.12	0.047619	0.12	0.12	0.111111	0.0833333	0.125	0.173913	0.0833333	0.166667	0.181818	0.08	0.0416667	0.352941	0.0714286	0.0833333	0.166667	0.290323	0.08	0.125	0.142857	0.208333	0.136364	0.148148	0.25	0.0952381	0.0769231	0.130435	0.333333	0.1	0.0869565	0.222222	0.321429	0.08	0.117647	0.08	0.217391	0.0434783	0.047619	0.125
hecogenin	0	0	0.181818	0.272727	0.0833333	0.125	0.0769231	0	0.0588235	0.214286	0	0.0625	0.214286	0.1875	0.153846	0.0666667	0.0666667	0.0714286	0.142857	0.0714286	0.142857	0.4	0.166667	0.0555556	0.0714286	0.0625	0.0357143	0.230769	0	0	0.125	0.166667	0.111111	0.142857	0	0.214286	0.0714286	0	0	0.0769231	0.047619	0.04	0.230769	0.173913	0	0.133333	0.0833333	0.1	0.230769
heliotrine	0.0588235	0.0555556	0.166667	0.153846	0.166667	0	0.16	0.222222	0.1875	0.2	0.2	0.0588235	0.125	0.111111	0.142857	0.0625	0.133333	0.333333	0.0869565	0.0666667	0.214286	0.153846	0.2	0.176471	0.142857	0.2	0.111111	0.214286	0.0625	0.272727	0.1875	0.25	0.105263	0.190476	0	0.2	0	0	0.333333	0.0714286	0.0952381	0.173913	0	0.217391	0.307692	0.125	0	0.333333	0.133333
helveticoside	0.25	0.130435	0.166667	0	0.105263	0	0.241379	0.125	0.130435	0.136364	0.0555556	0.0869565	0.0416667	0.08	0.0952381	0	0.0434783	0.15	0.142857	0.15	0.0909091	0.047619	0.264706	0.173913	0.0952381	0.25	0.423077	0.142857	0.0909091	0	0.238095	0.1	0.217391	0.185185	0.111111	0.0416667	0.210526	0.25	0.0555556	0.222222	0.2	0.259259	0.142857	0.0606061	0.0434783	0.190476	0.05	0.0555556	0.0909091
hemicholinium	0.0454545	0.0909091	0.0555556	0.176471	0.117647	0	0.214286	0	0.2	0.210526	0.0625	0.15	0.4375	0.190476	0.105263	0.466667	0.294118	0.166667	0.2	0.3125	0.222222	0.176471	0.366667	0	0.105263	0.210526	0.166667	0.1	0.1	0.1875	0.142857	0.25	0.181818	0.363636	0.0588235	0.277778	0.05	0	0.133333	0.25	0.272727	0.185185	0.1	0.434783	0.157895	0.210526	0.117647	0.133333	0.466667
heptaminol	0.0526316	0.105263	0.0666667	0.307692	0.230769	0.0909091	0.148148	0.0833333	0.105263	0.0526316	0.272727	0.176471	0.25	0.157895	0.285714	0.1875	0.117647	0.2	0.173913	0.2	0.1875	0.133333	0.225806	0.1	0.125	0.111111	0.103448	0.266667	0.0555556	0.0666667	0.05	0.214286	0.15	0.227273	0.0714286	0.176471	0.0588235	0	0.166667	0.307692	0.136364	0.115385	0	0.363636	0.461538	0.428571	0	0.555556	0.266667
hesperetin	0.115385	0.2	0.0869565	0.130435	0.136364	0	0.290323	0.1	0.2	0.318182	0.15	0.16	0.26087	0.347826	0.08	0.272727	0.272727	0.227273	0.333333	0.173913	0.272727	0.181818	0.342857	0.192308	0.125	0.208333	0.205882	0.0769231	0.217391	0.25	0.111111	0.0833333	0.185185	0.285714	0.0434783	0.318182	0.125	0.0740741	0.15	0.0833333	0.172414	0.225806	0.272727	0.344828	0.166667	0.16	0.136364	0.0952381	0.272727
hesperidin	0.1	0.15	0	0.1875	0.125	0.0769231	0.269231	0.153846	0.277778	0.157895	0.333333	0.294118	0.157895	0.2	0.0526316	0.235294	0.105263	0.25	0.26087	0.176471	0.166667	0.117647	0.25	0.263158	0.0526316	0.157895	0.214286	0.105263	0.105263	0.5	0.15	0.0555556	0.0869565	0.26087	0.307692	0.1	0.0526316	0	0.230769	0.0555556	0.125	0.192308	0.166667	0.391304	0.5	0.047619	0.0588235	0.142857	0.235294
hexamethonium bromide	0	0.0526316	0.153846	0.142857	0.0714286	0	0.0344828	0.0909091	0.0526316	0.266667	0.0833333	0.117647	0.117647	0.3125	0.133333	0	0.285714	0.133333	0.130435	0.0625	0.125	0.142857	0.15625	0.105263	0.0625	0.0555556	0.148148	0.285714	0.0588235	0	0	0.230769	0.157895	0.130435	0.0769231	0.1875	0.0625	0.0555556	0.0833333	0.142857	0.0434783	0.12	0.125	0.208333	0.125	0.266667	0	0.181818	0.2
hexestrol	0.32	0.259259	0.16	0.0714286	0.0740741	0	0.294118	0.04	0.214286	0.178571	0.0384615	0.1	0.178571	0.09375	0.107143	0.185185	0.142857	0.107143	0.25	0.107143	0.103448	0.0714286	0.307692	0.25	0.148148	0.269231	0.323529	0.0322581	0.28	0.115385	0.172414	0.0714286	0.241379	0.25	0.0769231	0.137931	0.192308	0.222222	0.08	0.111111	0.266667	0.235294	0.230769	0.162162	0.103448	0.1	0.208333	0.0384615	0.0666667
hexetidine	0.28	0.137931	0.166667	0.115385	0.166667	0.142857	0.194444	0.0869565	0.222222	0.142857	0.0833333	0.28	0.0666667	0.172414	0.25	0.107143	0.192308	0.0714286	0.21875	0.111111	0.0689655	0.0357143	0.190476	0.259259	0.153846	0.185185	0.419355	0.192308	0.107143	0.12	0.269231	0.208333	0.25	0.0833333	0.285714	0.142857	0.25	0.142857	0	0.0740741	0.193548	0.28125	0.192308	0.166667	0.148148	0.103448	0.0769231	0.04	0.107143
hexylcaine	0.0434783	0.0416667	0.0526316	0.166667	0.176471	0.142857	0.0294118	0.0625	0.0869565	0.333333	0.125	0.411765	0.2	0.238095	0.157895	0.210526	0.277778	0.047619	0.192308	0.047619	0.0454545	0.05	0.135135	0.0833333	0.047619	0.263158	0.2	0.210526	0.15	0.111111	0.0869565	0.105263	0.08	0.24	0.461538	0.263158	0.1	0.0909091	0	0.05	0.208333	0.1	0.277778	0.307692	0.15	0.0434783	0.111111	0.0588235	0.15
HNMPA-(AM)3	0.222222	0.216216	0.176471	0.108108	0.176471	0.0285714	0.571429	0.121212	0.363636	0.222222	0.117647	0.128205	0.294118	0.15	0.166667	0.194444	0.162162	0.272727	0.342105	0.166667	0.264706	0.242424	0.771429	0.314286	0.135135	0.222222	0.473684	0.131579	0.228571	0.212121	0.216216	0.205882	0.27027	0.378378	0.0833333	0.222222	0.105263	0.222222	0.151515	0.205882	0.324324	0.432432	0.228571	0.459459	0.194444	0.222222	0.212121	0.0857143	0.228571
homatropine	0	0.0526316	0.153846	0.142857	0.25	0.222222	0.0344828	0.0909091	0.176471	0.1875	0.0833333	0.1875	0.266667	0.105263	0.307692	0.285714	0.285714	0	0.181818	0.0625	0.0588235	0.230769	0.121212	0.05	0.133333	0.1875	0.107143	0.0588235	0.125	0.153846	0.0526316	0.230769	0.1	0.0833333	0.166667	0.1875	0.214286	0.0555556	0	0.142857	0.142857	0.037037	0.285714	0.16	0.125	0.1875	0.153846	0.0833333	0.2
homochlorcyclizine	0.25	0.3	0	0.1	0.05	0.133333	0.2	0	0.04	0	0.0555556	0.136364	0	0.173913	0.0952381	0.0434783	0.0434783	0	0.28	0.0952381	0	0	0.131579	0.227273	0.0952381	0	0.423077	0.142857	0.0434783	0	0.3	0.047619	0.217391	0.0322581	0.25	0	0.15	0.136364	0	0	0.111111	0.172414	0	0.129032	0.142857	0.0869565	0	0.0555556	0.0909091
homosalate	0	0	0.0625	0.5	0.0625	0.0833333	0.142857	0.166667	0.1	0.235294	0.25	0.105263	0.105263	0.210526	0.1875	0.111111	0.176471	0.117647	0.217391	0.0555556	0.111111	0.2	0.147059	0.277778	0.117647	0.166667	0.1	0.25	0.111111	0.307692	0.1	0.2	0	0.166667	0.230769	0.166667	0.0555556	0	0.0714286	0.125	0.181818	0.153846	0.111111	0.347826	0.333333	0.166667	0.0625	0.25	0.25
hycanthone	0.15	0.333333	0.117647	0.111111	0.266667	0.25	0.259259	0	0.0909091	0	0.0625	0.210526	0.0952381	0.136364	0.166667	0.222222	0	0.105263	0.25	0.235294	0.1	0.111111	0.205882	0.0416667	0.05	0.0454545	0.206897	0.1	0.047619	0.0555556	0.2	0.111111	0.130435	0.0714286	0.2	0.0952381	0.166667	0.277778	0.0625	0	0.12	0.103448	0.157895	0.137931	0.157895	0.210526	0.117647	0.133333	0.1
hydralazine	0.0526316	0.05	0.333333	0.133333	0.333333	0.0909091	0.0689655	0.0833333	0.05	0.176471	0.0769231	0.0526316	0.333333	0.1	0.384615	0.1875	0.1875	0.125	0.08	0.0588235	0.266667	0.214286	0.1875	0.047619	0.2	0.176471	0.0666667	0.266667	0.266667	0	0.05	0.214286	0.15	0.125	0	0.176471	0.2	0.111111	0.0769231	0.214286	0.25	0.0740741	0.266667	0.153846	0.1875	0.25	0.142857	0.272727	0.1875
hydrastine hydrochloride	0.1	0.0454545	0.2	0.117647	0.125	0	0.222222	0.0714286	0.210526	0.157895	0.0666667	0.1	0.222222	0.0434783	0.111111	0	0.235294	0.333333	0.0357143	0.0526316	0.3125	0.117647	0.37931	0.2	0.0526316	0.294118	0.214286	0.105263	0.05	0.2	0.0454545	0.357143	0.136364	0.208333	0.0625	0.222222	0.111111	0.1	0.142857	0.1875	0.173913	0.347826	0.105263	0.185185	0.105263	0.1	0.0588235	0.0666667	0.05
hydrastinine	0.0555556	0.111111	0	0.230769	0.0714286	0	0.25	0.0909091	0.176471	0.1875	0.0833333	0.117647	0.117647	0.235294	0.0625	0.125	0.125	0.307692	0.181818	0.0625	0.2	0.230769	0.233333	0.166667	0.214286	0.0555556	0.0689655	0	0.125	0.5	0.176471	0.142857	0	0.181818	0	0.266667	0	0.0555556	0.181818	0	0.263158	0.217391	0.125	0.318182	0.125	0	0.153846	0	0.2
hydrochlorothiazide	0	0.0434783	0.117647	0.176471	0.1875	0.153846	0	0.142857	0.0909091	0.210526	0.214286	0.210526	0.0454545	0.315789	0.235294	0.157895	0.294118	0.105263	0.2	0.166667	0.157895	0.176471	0.138889	0.0869565	0.235294	0.15	0.166667	0.375	0.157895	0.0555556	0.0909091	0.176471	0.238095	0.153846	0.2	0.0454545	0.166667	0.0454545	0.0625	0.25	0.0769231	0.0666667	0.222222	0.269231	0.222222	0.210526	0.117647	0.214286	0.222222
hydrocortisone	0.142857	0	0.0909091	0.0833333	0.0909091	0.142857	0.0384615	0.125	0.133333	0.142857	0	0.230769	0.0666667	0.125	0.166667	0	0.0714286	0.0769231	0.0952381	0.0769231	0.0714286	0.181818	0.0967742	0.0588235	0.0769231	0.142857	0.12	0.25	0	0	0.0625	0.0833333	0.1875	0.15	0.222222	0	0.272727	0	0	0.181818	0.05	0.0869565	0.25	0.0833333	0.0714286	0	0	0	0.153846
hydrocotarnine	0.0434783	0.0869565	0.111111	0.166667	0.0526316	0	0.4	0.0625	0.25	0.142857	0.125	0.0909091	0.263158	0.130435	0.047619	0.210526	0.0952381	0.157895	0.24	0.1	0.277778	0.3125	0.354839	0.181818	0.047619	0.142857	0.16129	0.0952381	0.277778	0.111111	0.0869565	0.05	0	0.291667	0.0555556	0.333333	0	0.142857	0.125	0.05	0.26087	0.222222	0.15	0.36	0.277778	0.142857	0.25	0	0.210526
hydroflumethiazide	0.0555556	0.176471	0.0714286	0	0.153846	0	0.2	0	0.176471	0.117647	0.0833333	0.266667	0.266667	0	0.0625	0.2	0.125	0.0625	0.130435	0.214286	0.125	0	0.233333	0.105263	0	0.1875	0.192308	0.0588235	0.0588235	0.153846	0.111111	0.0666667	0.1	0.130435	0	0.1875	0	0.1875	0.0833333	0	0.2	0.217391	0.0588235	0.208333	0.2	0.266667	0	0.0833333	0.0588235
hydroquinine	0.0555556	0.0526316	0.153846	0.0666667	0.0714286	0.1	0.0714286	0	0.111111	0	0.181818	0.1875	0.0555556	0.05	0.0625	0.125	0.0588235	0.0625	0.04	0.133333	0.125	0	0.121212	0.05	0.0625	0	0.192308	0.125	0.0588235	0	0.111111	0.142857	0.157895	0.130435	0.166667	0.0555556	0	0.0555556	0	0.142857	0.142857	0.166667	0.0588235	0.208333	0.125	0.1875	0.0714286	0.0833333	0.125
hydroxyachillin	0.0526316	0.105263	0.333333	0.0625	0.142857	0.2	0.0689655	0	0.166667	0.176471	0	0.25	0.111111	0.1	0.125	0.117647	0.117647	0	0.173913	0	0.0555556	0.214286	0.117647	0.1	0.0588235	0.0526316	0.230769	0.117647	0.117647	0.0666667	0.105263	0.133333	0.15	0.08	0.153846	0.111111	0.125	0.111111	0	0	0.0869565	0.0740741	0.357143	0.111111	0.117647	0.111111	0.0666667	0	0.117647
hydroxyzine	0	0	0.1875	0.25	0.117647	0.0714286	0.172414	0.0666667	0.142857	0.15	0.133333	0.15	0.15	0.136364	0.235294	0.1	0.157895	0.105263	0.153846	0.166667	0.222222	0.176471	0.28125	0.0869565	0.166667	0.15	0.166667	0.375	0.047619	0	0.2	0.428571	0.181818	0.25	0.125	0.210526	0.105263	0.0454545	0.0625	0.25	0.217391	0.185185	0.047619	0.269231	0.222222	0.4375	0	0.214286	0.375
hymecromone	0.153846	0.333333	0	0	0.1	0	0.0833333	0	0.142857	0.0714286	0	0.0714286	0.153846	0.133333	0.0833333	0.166667	0	0.0833333	0.1	0.181818	0	0	0.0645161	0	0	0.0714286	0.0384615	0	0	0.222222	0.230769	0	0.125	0.1	0	0	0.181818	0	0.285714	0	0	0.0434783	0	0.0416667	0.0769231	0.0714286	0	0.125	0.0769231
hyoscyamine	0.0740741	0.0714286	0.0869565	0.130435	0.0416667	0	0.333333	0.1	0.304348	0.26087	0.0952381	0.16	0.318182	0.192308	0.08	0.166667	0.272727	0.173913	0.125	0.125	0.272727	0.181818	0.516129	0.192308	0.08	0.26087	0.322581	0.166667	0.0769231	0.190476	0.111111	0.238095	0.142857	0.44	0.142857	0.26087	0.08	0.0357143	0.15	0.238095	0.259259	0.407407	0.0769231	0.444444	0.217391	0.115385	0.0416667	0	0.333333
IC-86621	0.125	0	0.166667	0.0714286	0.166667	0.111111	0.0357143	0.222222	0.117647	0.285714	0.0909091	0.125	0.125	0.111111	0.333333	0	0.0625	0.142857	0.0869565	0.0666667	0.133333	0.25	0.16129	0.111111	0.142857	0.2	0.0714286	0.416667	0.0625	0	0.117647	0.153846	0.235294	0.25	0.0833333	0.0588235	0.230769	0	0.0909091	0.25	0.0952381	0.125	0.214286	0.12	0.0625	0.125	0	0.2	0.133333
idazoxan	0.05	0.157895	0	0.0588235	0.133333	0	0.185185	0.0769231	0.1	0.05	0.153846	0.105263	0.105263	0.0454545	0.117647	0.176471	0.111111	0.1875	0.166667	0.1875	0.176471	0.125	0.21875	0.0952381	0.117647	0.105263	0.137931	0.111111	0.111111	0.133333	0.047619	0.125	0.2	0.217391	0	0.05	0.0555556	0.05	0.153846	0.2	0.130435	0.25	0.0526316	0.24	0.333333	0.3125	0	0.25	0.176471
idoxuridine	0.130435	0.125	0.047619	0.210526	0.047619	0	0.233333	0.1875	0.125	0.3	0.111111	0.0833333	0.130435	0.272727	0.2	0.0869565	0.25	0.2	0.178571	0.0909091	0.190476	0.15	0.257143	0.272727	0.2	0.130435	0.117647	0.25	0.0416667	0.157895	0.173913	0.210526	0.208333	0.375	0	0.181818	0.0909091	0.181818	0.176471	0.210526	0.24	0.206897	0.0869565	0.241379	0.190476	0.238095	0	0.176471	0.25
ifenprodil	0.0434783	0.0416667	0.25	0.166667	0.111111	0	0.25	0.0625	0.190476	0.333333	0.0588235	0.0434783	0.2	0.130435	0.1	0.15	0.277778	0.157895	0.192308	0.157895	0.15	0.166667	0.354839	0.3	0.1	0.2	0.285714	0.0454545	0.210526	0.25	0.136364	0.3125	0.173913	0.107143	0.117647	0.263158	0.047619	0.0434783	0	0.105263	0.318182	0.269231	0.277778	0.36	0.0454545	0.0909091	0.25	0.0588235	0.210526
ifosfamide	0.05	0.047619	0.0625	0.2	0.214286	0.181818	0.103448	0.0769231	0.1	0.105263	0.153846	0.3125	0.166667	0.15	0.117647	0.111111	0.176471	0.1875	0.217391	0.0555556	0.111111	0.0588235	0.181818	0.0454545	0	0.235294	0.269231	0.176471	0.111111	0.133333	0.047619	0.2	0.0909091	0.166667	0.6	0.105263	0.1875	0	0	0.285714	0.130435	0.111111	0.176471	0.291667	0.111111	0.105263	0.133333	0.0714286	0.176471
ikarugamycin	0.0588235	0.0555556	0.0769231	0.153846	0.272727	0.25	0.0357143	0	0.0555556	0.0588235	0.0909091	0.285714	0.125	0.25	0.230769	0.133333	0.133333	0	0.190476	0.0666667	0	0	0.0285714	0.0526316	0.142857	0.0588235	0.153846	0.214286	0.133333	0.0769231	0.117647	0.0714286	0.05	0	0.3	0.125	0.142857	0.0588235	0	0	0.15	0.0384615	0.0625	0.12	0.214286	0.0588235	0.0769231	0.0909091	0.0625
iloprost	0.12	0.115385	0.0909091	0.136364	0.142857	0.176471	0.0263158	0.05	0.0357143	0.12	0.1	0.333333	0.037037	0.363636	0.181818	0.08	0.125	0.04	0.206897	0.0833333	0.125	0.0869565	0.0697674	0.111111	0.238095	0.0769231	0.176471	0.35	0.125	0	0.208333	0.0416667	0.24	0.129032	0.15	0.12	0.238095	0.0769231	0.047619	0.0416667	0.1	0.121212	0.125	0.151515	0.125	0.12	0	0.1	0.08
imatinib	0.173913	0.166667	0.0952381	0.2	0.210526	0.1875	0.0857143	0	0.0769231	0.0384615	0.05	0.285714	0.125	0.318182	0.190476	0.238095	0.0833333	0.0869565	0.259259	0.190476	0.130435	0.0909091	0.097561	0.0740741	0.190476	0.08	0.181818	0.238095	0.130435	0.0454545	0.217391	0.0434783	0.25	0.0967742	0.157895	0.173913	0.25	0.0384615	0.05	0	0.142857	0.125	0.130435	0.193548	0.181818	0.08	0.0952381	0.105263	0.0833333
imidurea	0.0869565	0.130435	0.166667	0.222222	0.105263	0	0.384615	0.125	0.130435	0.136364	0.1875	0.0416667	0.190476	0.125	0.15	0.0909091	0.2	0.352941	0.185185	0.0952381	0.333333	0.222222	0.433333	0.227273	0.210526	0.136364	0.193548	0.142857	0.2	0.166667	0.0833333	0.294118	0.12	0.28	0	0.25	0.0952381	0.0869565	0.117647	0.294118	0.304348	0.307692	0.0909091	0.4	0.333333	0.315789	0.105263	0.1875	0.263158
imipenem	0.0555556	0	0.0714286	0.142857	0.0714286	0	0.111111	0.2	0.111111	0.117647	0.181818	0.0555556	0.1875	0.166667	0.214286	0.2	0.2	0.133333	0.130435	0.214286	0.2	0.230769	0.193548	0.05	0.214286	0.117647	0.107143	0.2	0.125	0	0	0.142857	0.222222	0.3	0	0.117647	0.133333	0	0.0833333	0.6	0.2	0.166667	0.0588235	0.26087	0.2	0.357143	0.0714286	0.181818	0.384615
imipramine	0.235294	0.047619	0.0625	0.0588235	0	0	0.185185	0.166667	0.1	0.105263	0.0714286	0	0.05	0.0952381	0.1875	0	0.111111	0.117647	0.12	0.117647	0.111111	0.0588235	0.147059	0.352941	0.117647	0.05	0.269231	0.25	0.0526316	0.0625	0.375	0.2	0.263158	0.166667	0.0666667	0.05	0.1875	0.05	0.0714286	0.125	0.3	0.25	0	0.148148	0.0526316	0.166667	0	0.0714286	0.0526316
indapamide	0.0909091	0.0869565	0.111111	0.166667	0.111111	0.142857	0.206897	0.0625	0.136364	0.142857	0.125	0.2	0.2	0.130435	0.1	0.15	0.15	0.157895	0.192308	0.047619	0.210526	0.235294	0.272727	0.130435	0	0.2	0.241379	0.210526	0.15	0.111111	0.0416667	0.105263	0.08	0.291667	0.266667	0.2	0.1	0.0909091	0.125	0.166667	0.16	0.269231	0.15	0.259259	0.210526	0.142857	0.0526316	0.0588235	0.0952381
indometacin	0.1	0.0952381	0.0588235	0.1875	0	0	0.03125	0	0	0.222222	0	0.1	0.1	0.2	0.176471	0.105263	0.235294	0	0.0740741	0.111111	0.05	0	0.0526316	0.142857	0.111111	0.157895	0.0967742	0.3125	0.105263	0	0.15	0.117647	0.136364	0.0740741	0.0625	0.157895	0.176471	0.047619	0	0.0555556	0.125	0.148148	0.05	0.103448	0.105263	0.157895	0	0.142857	0.105263
indoprofen	0	0.0555556	0.0769231	0.0714286	0	0.111111	0	0	0	0.0588235	0	0.125	0	0	0.0666667	0.133333	0.133333	0.0666667	0.0416667	0.0666667	0.0625	0	0.0285714	0	0.0666667	0.125	0.111111	0.133333	0	0	0.0555556	0.153846	0.105263	0.0869565	0.0833333	0	0.142857	0.0588235	0	0.153846	0.0454545	0.125	0.0625	0.037037	0.0625	0.2	0	0.0909091	0.0625
iobenguane	0	0	0.3	0.166667	0.181818	0.125	0.037037	0	0.125	0.133333	0	0.133333	0.133333	0.0555556	0.25	0.0666667	0.230769	0.153846	0	0.0714286	0.230769	0.0769231	0.206897	0.117647	0.25	0.0625	0.0740741	0.230769	0.0666667	0.181818	0.0588235	0.555556	0.176471	0.0434783	0	0.214286	0.0714286	0	0	0.166667	0.157895	0.238095	0.0666667	0.227273	0.0666667	0.133333	0.0833333	0.1	0.0666667
iocetamic acid	0.05	0	0.307692	0.125	0.307692	0.181818	0.0666667	0	0.157895	0.166667	0.0714286	0.3125	0.166667	0.0454545	0.266667	0.111111	0.25	0.117647	0.037037	0.117647	0.176471	0.0588235	0.181818	0	0.117647	0.4	0.137931	0.176471	0.111111	0.0625	0.047619	0.285714	0.142857	0.0769231	0.142857	0.166667	0.266667	0.05	0	0.2	0.181818	0.2	0.25	0.107143	0.111111	0.105263	0.0625	0.153846	0.0526316
iodixanol	0.0555556	0.0526316	0.25	0.142857	0.363636	0.375	0.0344828	0.0909091	0.0526316	0	0.181818	0.461538	0.0555556	0.166667	0.214286	0.0588235	0	0.214286	0.181818	0.0625	0.2	0.142857	0.121212	0	0.133333	0.117647	0.192308	0.285714	0.125	0	0.0526316	0.0666667	0.157895	0.0833333	0.4	0	0.307692	0.0555556	0.0833333	0.230769	0.0434783	0.037037	0.285714	0.115385	0.2	0.117647	0.0714286	0.181818	0.125
iohexol	0	0.0416667	0.333333	0.235294	0.333333	0.230769	0.09375	0	0.136364	0.2	0.0588235	0.411765	0.2	0.3	0.222222	0.210526	0.210526	0.1	0.192308	0.1	0.15	0.166667	0.2	0.04	0.157895	0.142857	0.2	0.15	0.15	0.0526316	0.0416667	0.166667	0.125	0.0689655	0.1875	0.333333	0.157895	0.0909091	0	0.105263	0.208333	0.1	0.352941	0.259259	0.15	0.0434783	0.25	0.0588235	0.15
ionomycin	0.307692	0.206897	0.153846	0.107143	0.0344828	0	0.551724	0.0384615	0.166667	0.133333	0.0769231	0.0625	0.172414	0.16129	0.0666667	0.1	0.137931	0.230769	0.242424	0.185185	0.222222	0.192308	0.529412	0.285714	0.185185	0.133333	0.393939	0.0645161	0.222222	0.111111	0.206897	0.148148	0.233333	0.28125	0.0740741	0.172414	0.142857	0.172414	0.0769231	0.107143	0.3	0.34375	0.178571	0.333333	0.137931	0.0625	0.2	0.037037	0.178571
iopamidol	0.047619	0.0952381	0	0.1875	0.0588235	0.166667	0.1	0.0714286	0.0952381	0.047619	0.230769	0.294118	0.1	0.0909091	0.111111	0.235294	0.166667	0.176471	0.115385	0.176471	0.235294	0.0555556	0.176471	0.0909091	0.0526316	0.157895	0.214286	0.235294	0.05	0.0588235	0.0454545	0.117647	0.136364	0.208333	0.307692	0.1	0.176471	0	0.0666667	0.1875	0.173913	0.24	0.05	0.28	0.4	0.157895	0	0.142857	0.166667
iopanoic acid	0	0.08	0.1	0.210526	0.157895	0	0.275862	0.0555556	0.125	0.0833333	0.111111	0.130435	0.181818	0.217391	0.142857	0.25	0.190476	0.263158	0.178571	0.263158	0.315789	0.0952381	0.419355	0.12	0.2	0.130435	0.266667	0.136364	0.136364	0.157895	0.125	0.277778	0.16	0.178571	0.105263	0.181818	0.0909091	0.0833333	0.111111	0.277778	0.291667	0.25	0.0869565	0.384615	0.315789	0.238095	0.157895	0.111111	0.470588
iopromide	0	0.0625	0	0.181818	0.0909091	0.142857	0	0	0.0625	0.142857	0	0.333333	0.0666667	0.125	0.0769231	0.0714286	0.0714286	0	0.0952381	0	0	0	0.030303	0	0.0769231	0.142857	0.0769231	0.153846	0	0.0909091	0.0625	0.0833333	0	0.0952381	0.222222	0.142857	0.0769231	0	0	0	0.105263	0.0416667	0	0.130435	0.0714286	0	0	0	0.0714286
ioversol	0.0588235	0.0555556	0.0769231	0.0714286	0.0769231	0.111111	0.0357143	0	0.117647	0.285714	0	0.384615	0.0588235	0.111111	0.0666667	0.0625	0.214286	0.0666667	0.0869565	0.0666667	0	0	0.0909091	0.0526316	0	0.285714	0.153846	0.133333	0	0.0769231	0.0555556	0.153846	0.05	0.0869565	0.3	0.2	0.142857	0.0588235	0	0.0714286	0.0454545	0.125	0.133333	0.0769231	0.0625	0	0	0	0.0625
ioxaglic acid	0.125	0.0555556	0.272727	0	0.272727	0.111111	0.115385	0.1	0.266667	0.285714	0	0.125	0.125	0	0.333333	0.0625	0.133333	0.0666667	0.0416667	0	0.0625	0.0714286	0.125	0.0526316	0.142857	0.285714	0.0714286	0.214286	0.133333	0.0769231	0.1875	0.25	0.05	0.0869565	0	0.2	0.142857	0.125	0	0.0714286	0.210526	0.173913	0.133333	0.0769231	0.0625	0.0588235	0.166667	0	0
ipratropium bromide	0.130435	0.227273	0.1	0.0952381	0.1	0	0.541667	0	0.227273	0.181818	0	0.04	0.238095	0.12	0.0434783	0.0869565	0.0869565	0.142857	0.269231	0.0434783	0.136364	0.210526	0.466667	0.12	0.0434783	0.181818	0.1875	0	0.190476	0.157895	0.125	0.15	0.0357143	0.269231	0.05	0.181818	0.0434783	0.238095	0.111111	0.0952381	0.192308	0.166667	0.136364	0.241379	0.0416667	0.04	0.222222	0	0.190476
iproniazid	0.133333	0.125	0	0	0.0833333	0.125	0.166667	0.428571	0.285714	0.214286	0.222222	0.133333	0.0625	0	0.0714286	0.230769	0.0666667	0.153846	0.2	0.0714286	0.0666667	0.166667	0.09375	0.266667	0	0.214286	0.16	0.0666667	0.142857	0.444444	0.125	0	0.0526316	0.2	0.2	0	0.153846	0	0.222222	0.0769231	0.157895	0.130435	0.142857	0.173913	0.142857	0	0.0833333	0.1	0
irinotecan	0.2	0.347826	0.181818	0	0.130435	0	0.464286	0	0.291667	0.2	0.0434783	0.111111	0.304348	0.103448	0.0769231	0.115385	0.115385	0.0769231	0.233333	0.0769231	0.115385	0.125	0.411765	0.103448	0.037037	0.153846	0.272727	0	0.208333	0.130435	0.148148	0.125	0.1	0.275862	0.0416667	0.153846	0.0769231	0.363636	0.0909091	0.0384615	0.25	0.21875	0.208333	0.176471	0.0740741	0.2	0.181818	0	0.16
isocarboxazid	0.125	0	0.166667	0.0714286	0.0769231	0.111111	0.0740741	0.222222	0.1875	0.125	0.0909091	0.285714	0	0.0526316	0.230769	0.0625	0.133333	0.142857	0	0.142857	0.133333	0.153846	0.0909091	0.176471	0.142857	0.2	0.111111	0.133333	0	0.0769231	0.117647	0.153846	0.105263	0.136364	0.0833333	0.0588235	0.333333	0.125	0.0909091	0.25	0.15	0.125	0.307692	0.037037	0.133333	0.125	0	0.0909091	0.0625
isoconazole	0.444444	0.285714	0.047619	0	0	0.0588235	0.15625	0.0555556	0.08	0.130435	0	0.130435	0.04	0.12	0.0909091	0.0869565	0.136364	0.0434783	0.137931	0.0434783	0.0416667	0	0.0731707	0.217391	0.142857	0.0833333	0.266667	0.136364	0.136364	0	0.227273	0	0.208333	0.0645161	0.05	0.0833333	0.2	0.238095	0	0.0454545	0.148148	0.25	0.0869565	0.0588235	0	0.04	0.047619	0	0
isocorydine	0.1	0.15	0	0.1875	0.125	0.166667	0.137931	0	0.0952381	0.222222	0.0666667	0.294118	0.222222	0.263158	0.111111	0.235294	0.166667	0.176471	0.318182	0.111111	0.105263	0.117647	0.25	0	0.0526316	0.157895	0.214286	0.166667	0.105263	0.125	0.15	0.117647	0.0869565	0.208333	0.416667	0.157895	0.111111	0.047619	0.0666667	0.0555556	0.173913	0.148148	0.166667	0.333333	0.105263	0	0.125	0.0666667	0.3125
isoetarine	0.0588235	0	0.166667	0.153846	0.0769231	0	0.0357143	0.1	0	0.0588235	0.0909091	0	0.0588235	0.111111	0.230769	0.133333	0.133333	0.142857	0.136364	0.333333	0.133333	0.0714286	0.16129	0.176471	0.333333	0.0588235	0.153846	0.214286	0.133333	0	0.117647	0.25	0.3125	0.0869565	0	0.0588235	0.142857	0.0588235	0.0909091	0.363636	0.277778	0.173913	0	0.166667	0.133333	0.384615	0.0769231	0.333333	0.133333
isoflupredone	0.0588235	0	0.272727	0.0714286	0.555556	0.25	0.115385	0.222222	0.117647	0.0588235	0.2	0.125	0.125	0.176471	0.454545	0.0625	0.0625	0.142857	0.0869565	0	0.214286	0.153846	0.0909091	0.0526316	0.230769	0.125	0.0714286	0.416667	0.307692	0	0.117647	0.0714286	0.105263	0.0869565	0.0833333	0.0588235	0.230769	0.0588235	0.0909091	0.25	0.15	0.0384615	0.214286	0.0769231	0.214286	0.125	0.166667	0.2	0.0625
isometheptene	0.0555556	0.0526316	0.25	0.142857	0.363636	0.375	0.0714286	0.0909091	0.111111	0.117647	0.0833333	0.357143	0.117647	0.166667	0.307692	0.125	0.0588235	0.0625	0.130435	0	0.125	0.0666667	0.0571429	0.105263	0.0625	0.117647	0.107143	0.285714	0.125	0	0.0526316	0.0666667	0.047619	0.04	0.272727	0.117647	0.307692	0.117647	0	0.142857	0.142857	0.037037	0.285714	0.0740741	0.2	0.0555556	0.153846	0.0833333	0.0588235
isoniazid	0.047619	0.15	0.0588235	0.1875	0.2	0.166667	0.1	0.0714286	0.15	0.222222	0.142857	0.294118	0.222222	0.263158	0.25	0.3125	0.166667	0.111111	0.208333	0.0526316	0.166667	0.117647	0.142857	0.0909091	0	0.1	0.0967742	0.166667	0.105263	0.2	0.15	0.0555556	0.0416667	0.115385	0.214286	0.294118	0.111111	0.1	0.142857	0	0.173913	0.148148	0.166667	0.230769	0.235294	0.047619	0.125	0.0666667	0.166667
isopropamide iodide	0	0	0	0.0909091	0	0	0.0833333	0.142857	0.0666667	0.0714286	0.125	0	0	0	0.0833333	0.0769231	0.166667	0.181818	0.047619	0.0833333	0.166667	0.2	0.1	0.133333	0.0833333	0.0714286	0.08	0.0769231	0.0769231	0.222222	0.0666667	0.2	0.0588235	0.157895	0	0	0.0833333	0	0.125	0.2	0.176471	0.142857	0.0769231	0.136364	0.166667	0.153846	0	0.125	0.0769231
isosorbide	0.0434783	0	0.111111	0.235294	0.25	0.0666667	0.09375	0.133333	0.0869565	0.142857	0.2	0.2	0.2	0.238095	0.222222	0.15	0.277778	0.222222	0.24	0.157895	0.15	0.166667	0.272727	0.04	0.157895	0.263158	0.285714	0.210526	0.210526	0.111111	0.0416667	0.235294	0.227273	0.24	0.357143	0.0909091	0.157895	0	0.0588235	0.5	0.208333	0.137931	0.210526	0.416667	0.210526	0.2	0.176471	0.2	0.352941
isotretinoin	0.25	0.3	0.05	0	0.166667	0.0625	0.2	0.0588235	0.130435	0.136364	0.0555556	0.136364	0.25	0.125	0.0454545	0.142857	0.142857	0.15	0.185185	0.15	0.142857	0.1	0.228571	0.173913	0.0454545	0.190476	0.321429	0.0434783	0.0909091	0.166667	0.130435	0.047619	0.166667	0.142857	0.0526316	0.0869565	0.210526	0.0869565	0.117647	0.047619	0.2	0.172414	0.0909091	0.206897	0.142857	0.0416667	0.05	0.0555556	0.0434783
isoxicam	0.1	0.0454545	0.125	0.1875	0.2	0.166667	0.1	0.25	0.15	0.047619	0.333333	0.375	0.1	0.142857	0.333333	0.235294	0.05	0.176471	0.16	0.176471	0.166667	0.117647	0.111111	0.0909091	0.111111	0.157895	0.172414	0.235294	0.105263	0.0588235	0.0454545	0.0555556	0.0869565	0.208333	0.307692	0.1	0.25	0.1	0.142857	0.266667	0.227273	0.148148	0.166667	0.185185	0.5	0.294118	0.0588235	0.230769	0.235294
isoxsuprine	0.1	0.0952381	0.285714	0.0555556	0.2	0	0.137931	0.0714286	0.0952381	0.1	0.0666667	0	0.157895	0.142857	0.176471	0.235294	0.166667	0.25	0.16	0.176471	0.166667	0.0555556	0.25	0.0434783	0.333333	0.157895	0.259259	0.105263	0.3125	0.0588235	0.15	0.1875	0.190476	0.115385	0	0.1	0.176471	0.157895	0.142857	0.357143	0.285714	0.192308	0.105263	0.142857	0.166667	0.222222	0.285714	0.142857	0.166667
isradipine	0.125	0.217391	0	0.2	0.0454545	0.0555556	0.310345	0.0526316	0.166667	0.125	0.105263	0.125	0.227273	0.208333	0.136364	0.238095	0.130435	0.0869565	0.36	0.0869565	0.238095	0.2	0.323529	0.208333	0.136364	0.125	0.114286	0.130435	0.181818	0.15	0.0769231	0.0909091	0.153846	0.36	0.1	0.173913	0.136364	0.08	0.166667	0.142857	0.142857	0.16129	0.04	0.275862	0.3	0.173913	0.0454545	0.105263	0.368421
ivermectin	0.375	0.307692	0.0357143	0.111111	0.0357143	0.0869565	0.222222	0.130435	0.133333	0.178571	0.125	0.222222	0.03125	0.206897	0.107143	0.0666667	0.103448	0.0689655	0.333333	0.0689655	0.0322581	0.0714286	0.159091	0.346154	0.107143	0.1	0.40625	0.142857	0.0666667	0.0740741	0.259259	0	0.241379	0.176471	0.166667	0.0645161	0.148148	0.269231	0.0384615	0.0344828	0.1875	0.2	0.142857	0.228571	0.142857	0.0645161	0.0740741	0.0384615	0.0666667
josamycin	0.25	0.181818	0.3125	0.047619	0.166667	0.0625	0.285714	0	0.3	0.0869565	0	0.136364	0.190476	0.0384615	0.0952381	0.0909091	0.142857	0.277778	0.142857	0.15	0.2	0.1	0.387097	0.125	0.210526	0.25	0.321429	0.2	0.263158	0.05	0.238095	0.222222	0.333333	0.230769	0.0526316	0.0869565	0.15	0.136364	0.117647	0.222222	0.153846	0.214286	0.142857	0.166667	0.0434783	0.0869565	0.235294	0.117647	0
kaempferol	0.285714	0.272727	0	0.0909091	0.0454545	0	0.151515	0.111111	0.12	0.285714	0.05	0.125	0.125	0.16	0.136364	0.181818	0.238095	0.0416667	0.214286	0.136364	0.04	0.0434783	0.125	0.16	0.0869565	0.285714	0.147059	0.130435	0.0833333	0.0952381	0.12	0.0434783	0.2	0.259259	0.047619	0.125	0.190476	0.173913	0.05	0.0909091	0.142857	0.16129	0.130435	0.15625	0.0833333	0.125	0.0454545	0.105263	0.0833333
kanamycin	0.111111	0.105263	0.142857	0.0625	0.230769	0	0.24	0	0.4	0.176471	0	0.111111	0.25	0	0.125	0.117647	0.1875	0.125	0.125	0.125	0.117647	0.133333	0.225806	0.157895	0.0588235	0.428571	0.142857	0	0.1875	0.230769	0.105263	0.214286	0.0952381	0.173913	0	0.111111	0.125	0.0526316	0.166667	0.133333	0.190476	0.115385	0.117647	0.111111	0.117647	0.0526316	0.142857	0.166667	0.0555556
karakoline	0.0869565	0.0833333	0.05	0.157895	0.105263	0.133333	0.0909091	0.125	0.0833333	0.190476	0.117647	0.315789	0.0869565	0.285714	0.210526	0.142857	0.2	0.15	0.230769	0.0952381	0.0909091	0.1	0.162162	0.08	0.0952381	0.136364	0.233333	0.263158	0.0434783	0.05	0.0833333	0.157895	0.217391	0.28	0.333333	0.0416667	0.210526	0.0869565	0.117647	0.294118	0.111111	0.133333	0.2	0.206897	0.2	0.190476	0	0.1875	0.333333
kawain	0.0625	0.0588235	0	0.0769231	0	0	0.0769231	0.111111	0.125	0.307692	0	0	0.133333	0.117647	0.153846	0.142857	0.230769	0.0714286	0.0909091	0.0714286	0.0666667	0.0769231	0.09375	0.0555556	0.0714286	0.214286	0.0740741	0.230769	0	0.0833333	0.125	0.166667	0.111111	0.263158	0	0	0.153846	0	0.1	0.272727	0.1	0.0833333	0.0666667	0.08	0.0666667	0.133333	0	0.1	0.230769
ketanserin	0.0384615	0.166667	0.15	0.263158	0.0952381	0.0555556	0.310345	0.0526316	0.0769231	0.173913	0.05	0.08	0.173913	0.45	0.136364	0.130435	0.130435	0.136364	0.307692	0.190476	0.181818	0.333333	0.363636	0.16	0.315789	0	0.147059	0.181818	0.181818	0.15	0.166667	0.142857	0.2	0.214286	0	0.227273	0.0869565	0.125	0.105263	0.142857	0.185185	0.2	0.181818	0.321429	0.0833333	0.285714	0.0952381	0.105263	0.3
ketoconazole	0.166667	0.047619	0.214286	0.0588235	0.0625	0	0.185185	0.166667	0.222222	0.235294	0.0714286	0	0.166667	0.0952381	0.1875	0.111111	0.25	0.0555556	0.12	0.0555556	0.111111	0.0588235	0.147059	0.277778	0.117647	0.235294	0.178571	0.25	0.176471	0.0625	0.1	0.2	0.142857	0.166667	0.0666667	0.166667	0.117647	0.105263	0.0714286	0.125	0.181818	0.153846	0.111111	0.107143	0.0526316	0.166667	0.133333	0.0714286	0
ketoprofen	0.0666667	0.133333	0	0	0.0909091	0	0.08	0	0.133333	0.230769	0	0.142857	0.142857	0.125	0	0.153846	0.153846	0.166667	0.0952381	0.0769231	0.0714286	0	0.0967742	0.0588235	0	0.142857	0.0769231	0.153846	0	0.2	0.214286	0.0833333	0.117647	0.210526	0	0.0666667	0	0.0666667	0.25	0.0833333	0	0.0416667	0.0714286	0.0833333	0.0714286	0.0666667	0	0.111111	0.0714286
ketorolac	0.0625	0	0.0833333	0.166667	0.0833333	0.125	0.037037	0.111111	0.125	0.0625	0.1	0.214286	0.0625	0.117647	0.0714286	0.0666667	0.142857	0.153846	0.0909091	0.0714286	0.142857	0.166667	0.129032	0.0555556	0.153846	0.133333	0.115385	0.142857	0.0666667	0.0833333	0.0588235	0.166667	0.176471	0.2	0.2	0.133333	0.153846	0	0	0.272727	0.047619	0.0833333	0.230769	0.173913	0	0.133333	0.0833333	0	0.0666667
ketotifen	0.05	0.1	0.133333	0.0588235	0.307692	0.181818	0.0666667	0.272727	0.157895	0.105263	0.363636	0.105263	0.05	0.0952381	0.357143	0.111111	0.0526316	0.117647	0.12	0	0.176471	0.2	0.114286	0.15	0.117647	0.105263	0.1	0.25	0.176471	0.133333	0.222222	0.0588235	0.142857	0.12	0.142857	0.05	0.117647	0.05	0.153846	0.0588235	0.0833333	0.111111	0.176471	0.192308	0.333333	0.105263	0.133333	0.153846	0.0526316
khellin	0.1	0.0454545	0.5	0.0555556	0.285714	0.0769231	0.137931	0	0.210526	0.1	0	0.222222	0.222222	0	0.25	0.166667	0.166667	0.176471	0.0357143	0.176471	0.166667	0.117647	0.25	0.0434783	0.25	0.375	0.214286	0.05	0.235294	0.0588235	0.0952381	0.266667	0.136364	0.0740741	0.0625	0.157895	0.25	0.157895	0.0666667	0.266667	0.285714	0.192308	0.3125	0.103448	0.105263	0.157895	0.285714	0.0666667	0.05
kinetin	0	0.142857	0.1875	0.176471	0.0555556	0	0.172414	0.142857	0.0909091	0.210526	0.133333	0.0454545	0.15	0.315789	0.105263	0.222222	0.157895	0.166667	0.25	0.166667	0.157895	0.176471	0.28125	0.136364	0.166667	0.0454545	0.206897	0.1	0.157895	0.1875	0.0909091	0.176471	0.130435	0.153846	0.125	0.15	0.05	0.0952381	0.133333	0.111111	0.12	0.142857	0.222222	0.32	0.1	0.277778	0.1875	0.133333	0.375
labetalol	0.142857	0.0869565	0	0	0.0526316	0	0.206897	0.133333	0.25	0.411765	0.0588235	0.0909091	0.142857	0.238095	0.1	0.0454545	0.277778	0.1	0.192308	0.1	0.0952381	0.166667	0.2	0.368421	0.1	0.142857	0.241379	0.210526	0.0952381	0.25	0.388889	0.105263	0.227273	0.291667	0	0.0909091	0.1	0.0909091	0.125	0.105263	0.26087	0.222222	0.15	0.172414	0.0454545	0.0909091	0	0	0.0952381
lactobionic acid	0.0588235	0.0555556	0.0769231	0.25	0	0	0.16	0.1	0.0555556	0.0588235	0.0909091	0.0588235	0	0.176471	0	0.133333	0.0625	0.333333	0.0869565	0.142857	0.214286	0.153846	0.16129	0.111111	0.333333	0.0588235	0.111111	0.0625	0.133333	0.166667	0.1875	0.0714286	0.05	0.136364	0	0.2	0	0.0588235	0.0909091	0.0714286	0.210526	0.173913	0.0625	0.272727	0.133333	0	0.272727	0	0.133333
lanatoside C	0.181818	0.173913	0.157895	0.0454545	0.1	0	0.275862	0.117647	0.125	0.130435	0.0526316	0.04	0.0833333	0.166667	0.0909091	0	0.0416667	0.0909091	0.178571	0.142857	0.0869565	0.0952381	0.257143	0.166667	0.0909091	0.181818	0.357143	0.136364	0.0869565	0	0.227273	0.0952381	0.16	0.178571	0.05	0.0833333	0.2	0.238095	0.0526316	0.210526	0.192308	0.206897	0.0869565	0.0909091	0.0416667	0.3	0.047619	0.0526316	0.136364
lansoprazole	0	0	0.0833333	0.272727	0.3	0.285714	0.037037	0.111111	0.0588235	0	0.222222	0.133333	0.0625	0.1875	0.363636	0.0666667	0.0666667	0.0714286	0.142857	0.0714286	0.142857	0.272727	0.09375	0	0.25	0.0625	0	0.230769	0.0666667	0	0.0588235	0.166667	0.111111	0.0909091	0.0909091	0.0625	0.153846	0	0.1	0.272727	0.047619	0.04	0.0666667	0.125	0.230769	0.214286	0	0.375	0.230769
lasalocid	0.304348	0.24	0.130435	0.125	0.130435	0.157895	0.205882	0.0454545	0.148148	0.111111	0.0909091	0.304348	0.0344828	0.230769	0.12	0.0740741	0.16	0.12	0.275862	0.0769231	0.0740741	0.0384615	0.2	0.185185	0.217391	0.153846	0.5	0.16	0.16	0.04	0.291667	0.125	0.222222	0.0882353	0.315789	0.111111	0.272727	0.153846	0	0.08	0.166667	0.181818	0.208333	0.176471	0.0740741	0.0344828	0.130435	0.0434783	0.0740741
latamoxef	0.24	0.333333	0.0384615	0.0769231	0.0384615	0	0.5	0.0909091	0.28	0.148148	0.0869565	0.107143	0.148148	0.137931	0	0.153846	0.111111	0.26087	0.407407	0.16	0.153846	0.217391	0.53125	0.32	0.0740741	0.148148	0.433333	0	0.153846	0.285714	0.230769	0.037037	0.214286	0.310345	0.0833333	0.0689655	0.0357143	0.347826	0.190476	0.037037	0.125	0.290323	0.25	0.28125	0.153846	0.107143	0.173913	0.0416667	0.153846
laudanosine	0.133333	0.166667	0.111111	0.107143	0.111111	0	0.551724	0.08	0.206897	0.172414	0.12	0.0967742	0.259259	0.2	0.0666667	0.137931	0.178571	0.333333	0.28125	0.185185	0.32	0.291667	0.733333	0.2	0.142857	0.172414	0.352941	0.0645161	0.178571	0.2	0.166667	0.192308	0.233333	0.413793	0.0740741	0.214286	0.0666667	0.172414	0.166667	0.24	0.3	0.387097	0.178571	0.466667	0.178571	0.172414	0.153846	0.037037	0.32
leflunomide	0.105263	0	0.307692	0	0.214286	0.0833333	0.103448	0	0.157895	0.235294	0	0.3125	0.166667	0.0952381	0.117647	0.0526316	0.25	0.117647	0.0769231	0.1875	0.176471	0.0588235	0.21875	0.15	0.117647	0.3125	0.222222	0.111111	0.111111	0.0625	0.157895	0.2	0.2	0.0769231	0.0666667	0.235294	0.266667	0.166667	0	0.125	0.238095	0.2	0.333333	0.0689655	0	0.105263	0.0625	0	0
letrozole	0.05	0.047619	0	0.285714	0.0625	0.181818	0.0322581	0.0769231	0.047619	0.166667	0.0714286	0.235294	0.05	0.15	0.1875	0.176471	0.176471	0.0555556	0.12	0.0555556	0.111111	0	0.0540541	0.0454545	0.117647	0.235294	0.1	0.428571	0.0526316	0	0.047619	0.125	0.0434783	0.217391	0.230769	0.105263	0.1875	0	0	0.2	0.181818	0.153846	0	0.192308	0.176471	0.105263	0	0.153846	0.111111
levamisole	0.166667	0.222222	0	0	0.0625	0	0.28	0	0.375	0.235294	0.0714286	0.105263	0.3125	0.0952381	0	0.176471	0.0526316	0.117647	0.272727	0.117647	0.111111	0.2	0.258065	0.15	0.0555556	0.166667	0.137931	0.0526316	0.176471	0.214286	0.294118	0	0.142857	0.4	0	0.05	0	0.105263	0.25	0	0.130435	0.111111	0.111111	0.192308	0.111111	0.05	0.133333	0.0714286	0.176471
levcycloserine	0.047619	0.0454545	0.125	0.357143	0.125	0.0769231	0.222222	0.0714286	0.15	0.294118	0.142857	0.157895	0.157895	0.2	0.176471	0	0.166667	0.111111	0.208333	0	0.105263	0.1875	0.25	0.2	0.0526316	0.157895	0.0967742	0.235294	0.05	0.285714	0.0952381	0.266667	0.0416667	0.208333	0.133333	0.294118	0	0.047619	0.0666667	0.0555556	0.173913	0.24	0.05	0.333333	0.235294	0.1	0	0.142857	0.166667
levobunolol	0	0	0.0666667	0.214286	0.230769	0.2	0.0333333	0.0833333	0.105263	0.111111	0.272727	0.25	0.176471	0.222222	0.285714	0.1875	0.266667	0.125	0.173913	0.125	0.357143	0.214286	0.1875	0	0.2	0.111111	0.103448	0.461538	0.117647	0	0.05	0.214286	0.210526	0.227273	0.153846	0.111111	0.125	0	0.0769231	0.214286	0.136364	0.115385	0.117647	0.304348	0.357143	0.25	0	0.272727	0.357143
levocabastine	0	0.05	0.0666667	0.307692	0.0666667	0	0.107143	0.181818	0.05	0.111111	0.166667	0.0526316	0.111111	0.157895	0.2	0.117647	0.266667	0.285714	0.08	0.0588235	0.357143	0.133333	0.225806	0.222222	0.2	0.111111	0.142857	0.357143	0.117647	0.142857	0.05	0.307692	0.0952381	0.173913	0.0714286	0.176471	0.0588235	0	0.166667	0.214286	0.190476	0.208333	0	0.363636	0.461538	0.25	0	0.272727	0.266667
levodopa	0	0.0909091	0.117647	0.333333	0.117647	0.0714286	0.172414	0.0666667	0.142857	0.15	0.214286	0.210526	0.210526	0.5625	0.105263	0.222222	0.1	0.105263	0.304348	0.235294	0.157895	0.25	0.242424	0	0.166667	0.0454545	0.129032	0.157895	0.1	0.0555556	0.0434783	0.0526316	0.130435	0.25	0.125	0.277778	0.05	0	0.133333	0.176471	0.12	0.103448	0.1	0.375	0.222222	0.210526	0.117647	0.133333	0.466667
levomepromazine	0.384615	0.233333	0.103448	0.1	0.185185	0.0769231	0.342857	0.0740741	0.233333	0.16129	0.0714286	0.241379	0.125	0.151515	0.214286	0.09375	0.206897	0.133333	0.194444	0.172414	0.129032	0.0645161	0.317073	0.266667	0.133333	0.285714	0.411765	0.206897	0.09375	0.103448	0.321429	0.178571	0.3	0.194444	0.148148	0.125	0.259259	0.16129	0.0714286	0.137931	0.28125	0.285714	0.129032	0.210526	0.206897	0.0588235	0.0322581	0.111111	0.09375
levonorgestrel	0.26087	0.111111	0.0416667	0.181818	0.0416667	0.05	0.25	0.1	0.111111	0.208333	0.0454545	0.16	0.115385	0.291667	0.08	0.166667	0.217391	0.173913	0.384615	0.125	0.166667	0.130435	0.236842	0.24	0.173913	0.208333	0.28125	0.166667	0.272727	0.136364	0.111111	0.04	0.230769	0.285714	0.2	0.16	0.285714	0.0740741	0	0.130435	0.214286	0.1875	0.272727	0.258065	0.0769231	0	0.190476	0	0.166667
levopropoxyphene	0.0555556	0.0526316	0.25	0.230769	0.363636	0.375	0.0714286	0	0.0526316	0	0.0833333	0.357143	0.1875	0.166667	0.214286	0.125	0	0.133333	0.181818	0.0625	0.125	0.142857	0.121212	0	0.0625	0.117647	0.148148	0.2	0.125	0	0.0526316	0.0666667	0.1	0.0833333	0.4	0.117647	0.307692	0.0555556	0	0.230769	0.0909091	0.037037	0.285714	0.115385	0.2	0.117647	0.153846	0.0833333	0.125
levothyroxine sodium	0	0.0526316	0.153846	0.142857	0.0714286	0.1	0.111111	0.2	0.25	0.266667	0.181818	0.0555556	0.1875	0.105263	0.133333	0.125	0.125	0.133333	0.130435	0	0.2	0.230769	0.193548	0.166667	0.0625	0.117647	0.107143	0.285714	0.0588235	0.25	0.25	0.230769	0.1	0.238095	0.0769231	0.117647	0.0625	0	0.181818	0.142857	0.0909091	0.12	0.125	0.208333	0.0588235	0.1875	0.0714286	0.0833333	0.125
lidocaine	0	0.05	0.142857	0.307692	0.142857	0.0909091	0.0333333	0.0833333	0.05	0.111111	0.166667	0.176471	0.111111	0.294118	0.125	0.1875	0.0555556	0	0.173913	0.125	0	0.0625	0.0555556	0.047619	0.125	0.111111	0.103448	0.1875	0.1875	0.0666667	0.05	0	0.0454545	0.125	0.25	0.176471	0.0588235	0.0526316	0	0.133333	0.136364	0.0357143	0.117647	0.25	0.1875	0.176471	0.230769	0.0769231	0.117647
lidoflazine	0.157895	0.0454545	0.2	0	0.2	0	0.178571	0	0.210526	0.157895	0	0.157895	0.222222	0.142857	0.176471	0.05	0.235294	0.111111	0.0740741	0.111111	0.105263	0.0555556	0.176471	0.142857	0.111111	0.294118	0.172414	0.05	0.235294	0.0588235	0.15	0.117647	0.136364	0.115385	0.0625	0.222222	0.25	0.157895	0.0666667	0.117647	0.173913	0.148148	0.235294	0.0322581	0.05	0.047619	0.2	0	0
lincomycin	0	0	0.1	0.333333	0.1	0.166667	0	0	0	0.153846	0.125	0.153846	0.153846	0.133333	0.181818	0.0769231	0.0769231	0	0.1	0	0.0769231	0	0.0645161	0.0625	0	0.0714286	0.0384615	0.4	0.0769231	0	0	0.0909091	0	0.047619	0.25	0.153846	0	0	0	0	0.111111	0.0909091	0	0.190476	0.166667	0.0714286	0	0.285714	0.0769231
liothyronine	0	0.0909091	0.117647	0.25	0.0555556	0	0.172414	0.0666667	0.142857	0.277778	0.0625	0.0952381	0.15	0.190476	0.105263	0.1	0.294118	0.235294	0.0714286	0.105263	0.294118	0.111111	0.28125	0.190476	0.05	0.210526	0.166667	0.294118	0.047619	0.1875	0.0909091	0.333333	0.04	0.153846	0.0588235	0.352941	0.05	0	0.0625	0.0526316	0.166667	0.28	0.047619	0.375	0.222222	0.15	0.0555556	0.0625	0.157895
lisinopril	0.142857	0.0625	0	0	0.2	0	0.08	0.285714	0.307692	0.333333	0.111111	0.142857	0.230769	0	0.166667	0.25	0.25	0.0769231	0.0952381	0.0769231	0.0714286	0	0.0967742	0.125	0	0.454545	0.0769231	0.153846	0.153846	0.333333	0.0625	0.0833333	0.0555556	0.15	0.1	0.142857	0.0769231	0	0.111111	0.0833333	0.166667	0.136364	0.0714286	0.181818	0.0714286	0	0.0909091	0.111111	0
lisuride	0.105263	0.1	0.133333	0.125	0.133333	0.3	0.0322581	0	0.047619	0.05	0.0714286	0.3125	0	0.15	0.1875	0.111111	0.0526316	0.0555556	0.12	0.117647	0.0526316	0.0588235	0.0833333	0	0.1875	0.105263	0.178571	0.333333	0.111111	0	0.222222	0.0588235	0.2	0.0769231	0.333333	0	0.266667	0	0	0.125	0.04	0.153846	0.111111	0.107143	0.111111	0	0.0625	0.0714286	0.0526316
lithocholic acid	0.05	0.047619	0.214286	0.285714	0.133333	0.3	0.0322581	0.0769231	0.1	0.166667	0.0714286	0.235294	0.05	0.0952381	0.357143	0.176471	0.111111	0.0555556	0.12	0.117647	0.111111	0.0588235	0.114286	0.0952381	0.1875	0.166667	0.137931	0.538462	0.0526316	0	0.1	0.285714	0.142857	0.12	0.230769	0.05	0.266667	0	0	0.285714	0.181818	0.153846	0.0526316	0.192308	0.176471	0.166667	0.0625	0.25	0.111111
LM-1685	0.3	0.290323	0.129032	0.0285714	0.09375	0	0.470588	0.103448	0.333333	0.3	0.1	0.181818	0.21875	0.108108	0.121212	0.117647	0.117647	0.15625	0.314286	0.15625	0.117647	0.16129	0.583333	0.322581	0.0882353	0.21875	0.416667	0.117647	0.151515	0.166667	0.212121	0.0909091	0.272727	0.393939	0.030303	0.147059	0.0571429	0.344828	0.178571	0.125	0.257143	0.411765	0.151515	0.289474	0.151515	0.181818	0.09375	0.1	0.117647
L-methionine sulfoximine	0	0.05	0.230769	0.214286	0.0666667	0.0909091	0.0689655	0.0833333	0.235294	0.25	0.166667	0.176471	0.25	0.157895	0.2	0.357143	0.1875	0	0.125	0.2	0.117647	0.133333	0.1875	0.1	0.285714	0.111111	0.103448	0.117647	0.117647	0.142857	0.105263	0.214286	0.15	0.173913	0.0714286	0.176471	0.125	0	0.0769231	0.133333	0.25	0.115385	0.1875	0.25	0.117647	0.176471	0.142857	0.166667	0.266667
lobelanidine	0.047619	0.0454545	0.125	0.266667	0.125	0	0.269231	0	0.15	0.157895	0	0.1	0.294118	0.2	0.111111	0.166667	0.235294	0.176471	0.16	0.0526316	0.235294	0.1875	0.290323	0.0909091	0.111111	0.222222	0.133333	0.105263	0.166667	0.125	0.0952381	0.266667	0	0.16	0.133333	0.466667	0	0.1	0.0666667	0.0555556	0.227273	0.192308	0.105263	0.333333	0.166667	0.1	0.2	0	0.3125
lobeline	0.206897	0.16129	0.148148	0.0322581	0.192308	0.0384615	0.393939	0.12	0.384615	0.166667	0.16	0.166667	0.25	0.0882353	0.1	0.172414	0.259259	0.32	0.235294	0.178571	0.36	0.185185	0.709677	0.193548	0.178571	0.296296	0.46875	0.133333	0.259259	0.192308	0.241379	0.230769	0.357143	0.4	0.111111	0.166667	0.1	0.206897	0.16	0.185185	0.290323	0.419355	0.172414	0.40625	0.172414	0.129032	0.192308	0.0740741	0.172414
lomefloxacin	0.0666667	0.133333	0.0909091	0.0833333	0.2	0	0.08	0	0.133333	0.142857	0	0.142857	0.230769	0.125	0.166667	0.363636	0.153846	0.0769231	0.0952381	0.166667	0	0	0.0625	0.0588235	0.0769231	0.142857	0.037037	0	0.0714286	0.2	0.133333	0.0833333	0.0555556	0.0952381	0	0.142857	0.0769231	0.142857	0.25	0.0833333	0.105263	0	0.153846	0.04	0.25	0.142857	0.0909091	0.25	0.153846
lomustine	0.178571	0.259259	0.0357143	0.0714286	0.115385	0	0.419355	0.0833333	0.172414	0.1	0.125	0.0645161	0.222222	0.206897	0.0333333	0.142857	0.185185	0.291667	0.212121	0.148148	0.391304	0.25	0.416667	0.25	0.107143	0.137931	0.323529	0.142857	0.185185	0.16	0.133333	0.0714286	0.241379	0.290323	0	0.137931	0.0689655	0.1	0.173913	0.111111	0.151515	0.3125	0.142857	0.34375	0.230769	0.178571	0.0740741	0.08	0.185185
loperamide	0.310345	0.344828	0.172414	0	0.133333	0.0344828	0.4	0.0333333	0.181818	0.117647	0.0666667	0.151515	0.151515	0.111111	0.0909091	0.121212	0.121212	0.2	0.25	0.16129	0.15625	0.09375	0.513514	0.111111	0.16129	0.151515	0.5625	0.15625	0.15625	0.0625	0.344828	0.129032	0.413793	0.285714	0.0645161	0.0555556	0.125	0.266667	0.103448	0.166667	0.162162	0.342857	0.15625	0.230769	0.121212	0.1875	0.0967742	0.0666667	0.15625
loracarbef	0	0	0.0833333	0.272727	0.0833333	0	0.0769231	0.111111	0	0.133333	0.1	0	0.214286	0.266667	0.153846	0.0666667	0.142857	0.25	0.2	0.0714286	0.230769	0.4	0.206897	0.0555556	0.0714286	0	0.0740741	0.230769	0.0666667	0	0	0.166667	0.176471	0.2	0	0.214286	0	0	0.1	0.272727	0.047619	0.0833333	0.142857	0.285714	0.0666667	0.307692	0.0833333	0.222222	0.333333
lorglumide	0.047619	0.0952381	0.0588235	0.1875	0.0588235	0	0.375	0	0.277778	0.1	0.0666667	0.157895	0.294118	0.2	0	0.3125	0	0.111111	0.26087	0.25	0.166667	0.266667	0.333333	0.0909091	0.111111	0.1	0.0967742	0	0.166667	0.2	0.15	0.0555556	0.0869565	0.45	0.0625	0.222222	0	0.047619	0.230769	0.117647	0.227273	0.107143	0.105263	0.333333	0.105263	0.1	0.2	0.0666667	0.3125
lovastatin	0.173913	0.12	0.277778	0.142857	0.352941	0.117647	0.1875	0	0.12	0.173913	0.05	0.35	0.227273	0.208333	0.315789	0.0833333	0.130435	0.136364	0.214286	0.136364	0.0833333	0.0909091	0.216216	0.208333	0.25	0.125	0.21875	0.181818	0.238095	0.15	0.333333	0.142857	0.2	0.0967742	0.047619	0.227273	0.190476	0.227273	0.05	0.0434783	0.391304	0.2	0.3	0.233333	0.130435	0.173913	0.15	0.166667	0
[truncated: 670 more rows]
[truncated: 1,260 more columns]

## Sheet: Table S3
Table S3. Target enrichment of approved drugs
Drugs	Number of Original Targets	Number of Enriched Targets	Enriched Targets	P-val	Q-val
amitriptyline	20	14	P28223	8.65062e-12	3.51e-10
[truncated: 351 more rows]

## Sheet: Table S4
Table S4. Predicted similar drugs and associated targets of 20 polyphenols
[truncated: 112 more rows]
